# Supplementary material for: INTACT vs. FANS for Cell-Type-Specific Nuclei Sorting: A Comprehensive Qualitative and Quantitative Comparison
Source: MDPI journal article supplement (doi:10.3390/ijms22105335), 2021-05-19
Supplement: s1 [file s1]

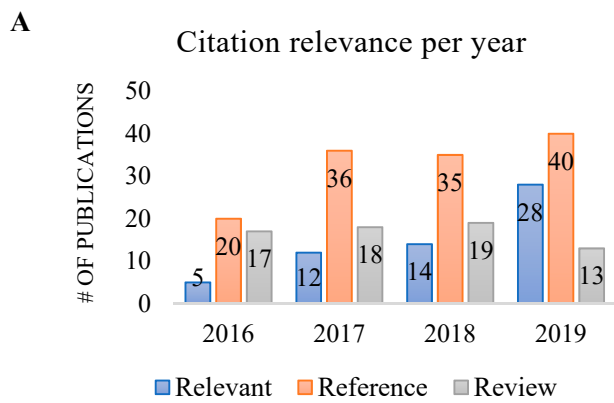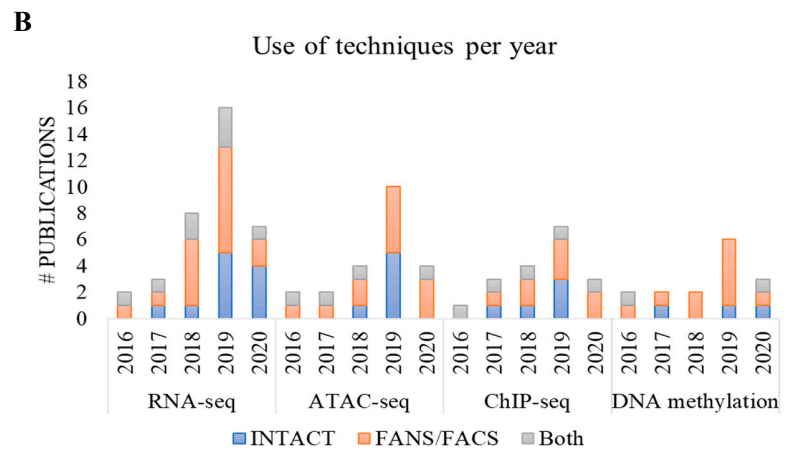

**C** Distribution of all tissues used across all relevant citations

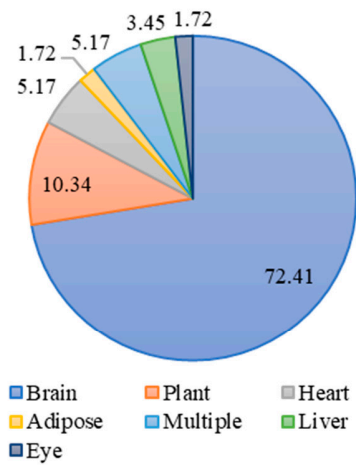

**D** Tissue used per technique

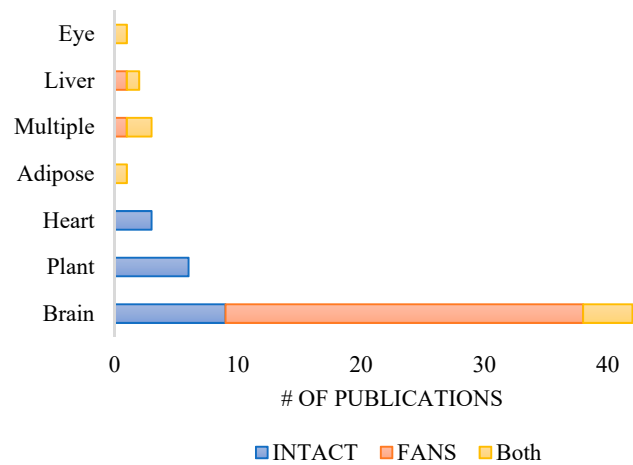

**F** Distribution of all organisms used across all relevant citations

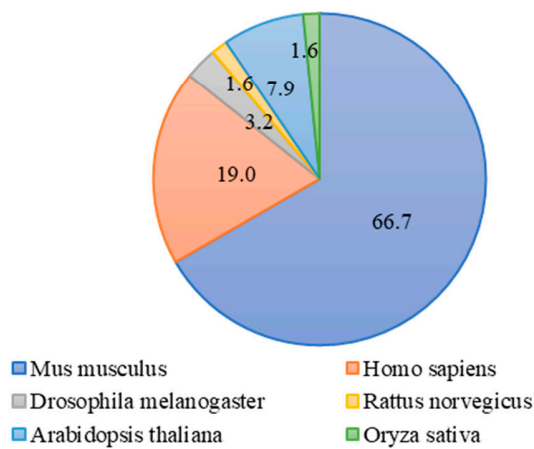

**G** Organism used per technique

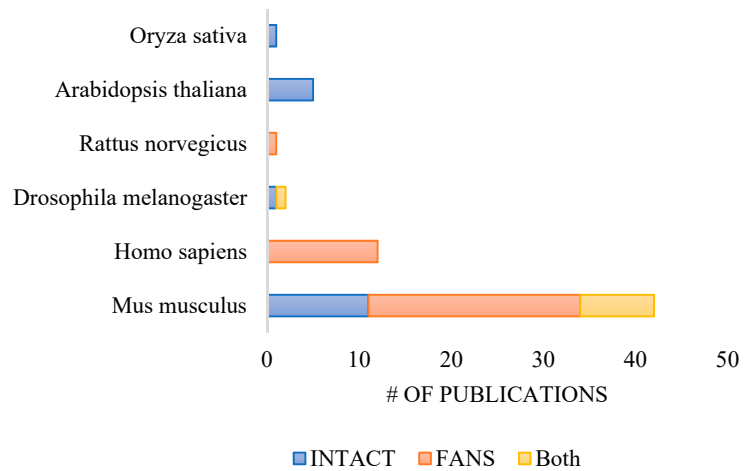

**Supplementary Figure S1.** Literature review of Mo et al. (2015) citations. **A.** Classification of “relevant”, and “non-relevant” (“reference” and “review”) publications per year. **B.** Number of publications using the selected techniques per year. **C.** Distribution of all tissues across all relevant publications irrespective of technique. **D.** Classification of tissue used per technique **E.** Distribution of all organism across all relevant publications irrespective of technique. **F.** Classification of organisms used per technique.

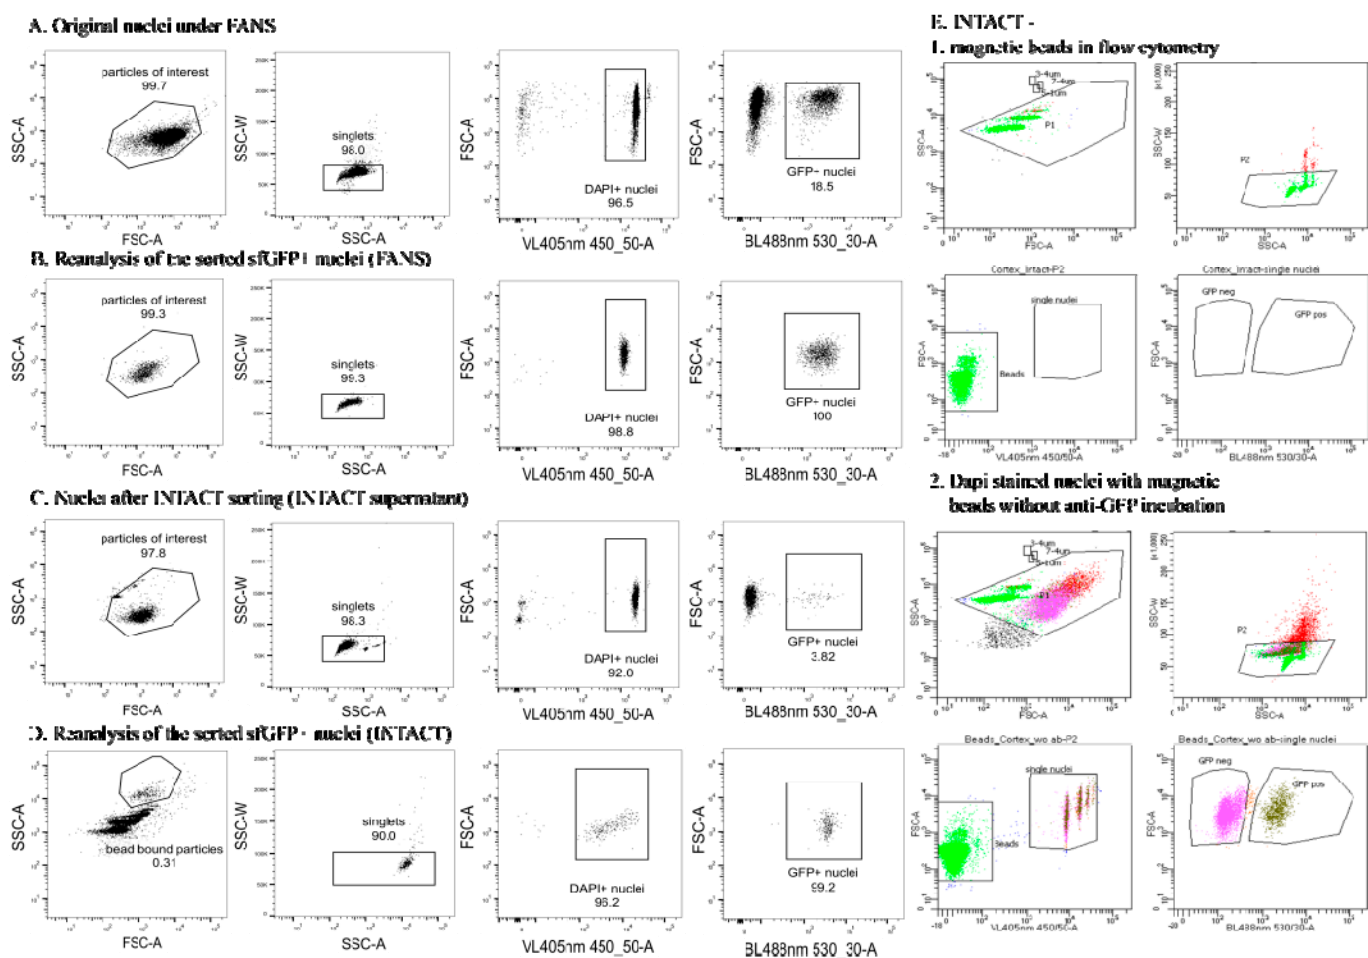

**Supplementary Figure S2.** Steps leading to the purity analysis of sorted nuclei using flow cytometry. **A.** Input nuclei undergoing FANS sorting. **B.** Reanalysis of the FANS sorted sfGFP+ nuclei. **C.** Analysis of supernatant remaining after INTACT bead purification. **D.** Reanalysis of the INTACT sorted sfGFP+ nuclei (anti-GFP incubated nuclei). **E.** Establishing flow cytometry sorting for samples with magnetic beads.

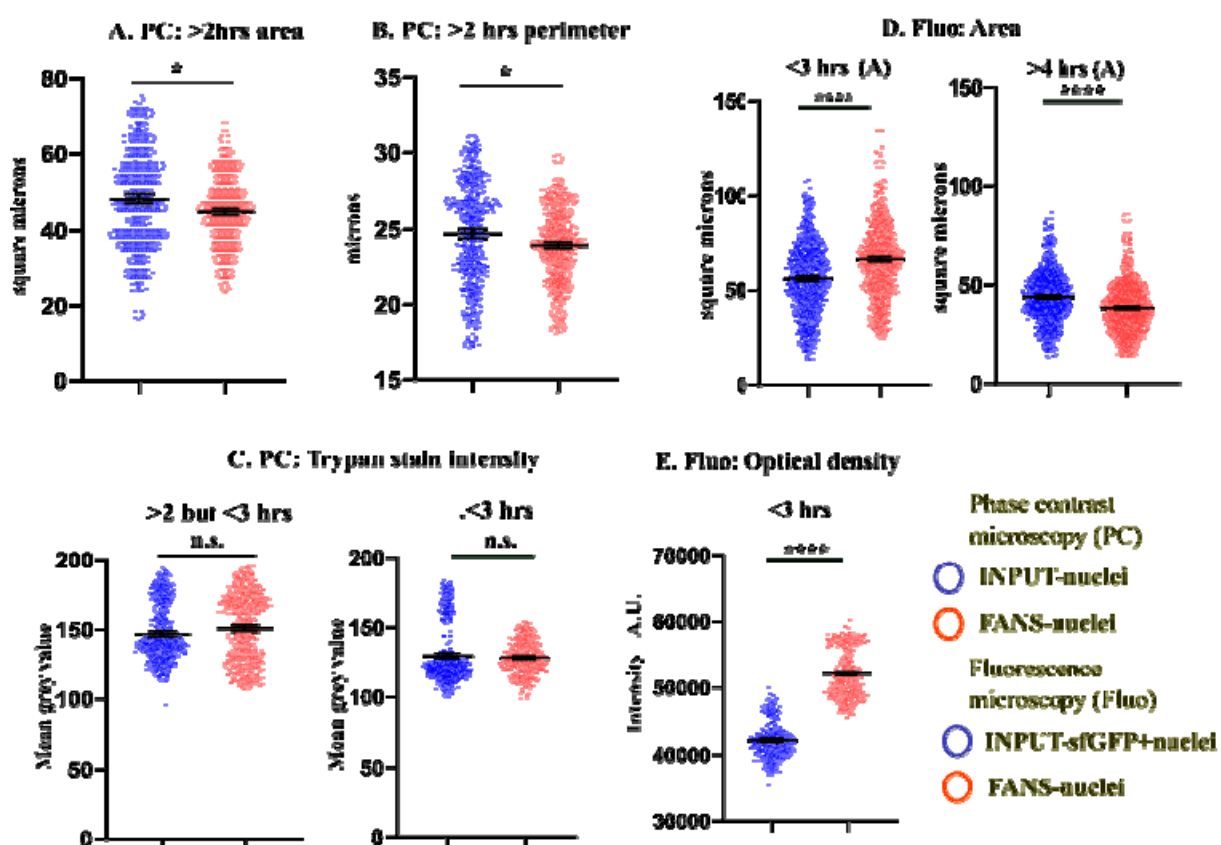

**Supplementary Figure S3.** Additional parameter changes in FANS nuclei as compared to INPUT nuclei at different time points after sorting PC: Phase Contrast Microscopy, Fluo: Fluorescence Microscopy **A.** Area of nuclei observed within 2 hours ( $p < 0.05$ ) **B.** Perimeter of nuclei observed within 2 hours ( $p < 0.05$ ) **C.** Trypan staining intensity observed within 3 hours (n.s., n.s.) **D.** Automated area calculations for nuclei embedded in the IBIDI chamber at different time points after the sorting ( $p < 0.0001$ ,  $p < 0.0001$ ) **E.** Optical density of sorted nuclei ( $p < 0.0001$ )

A

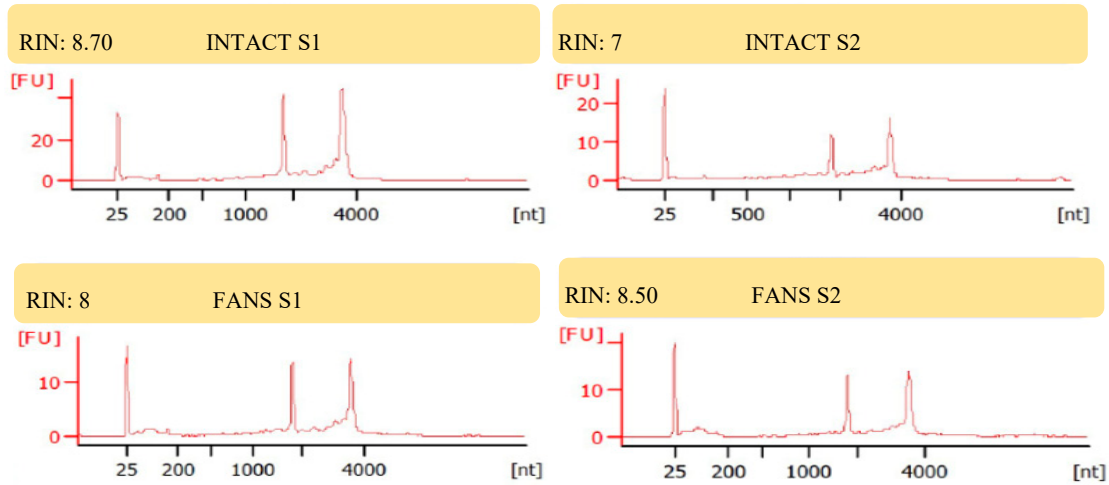

B

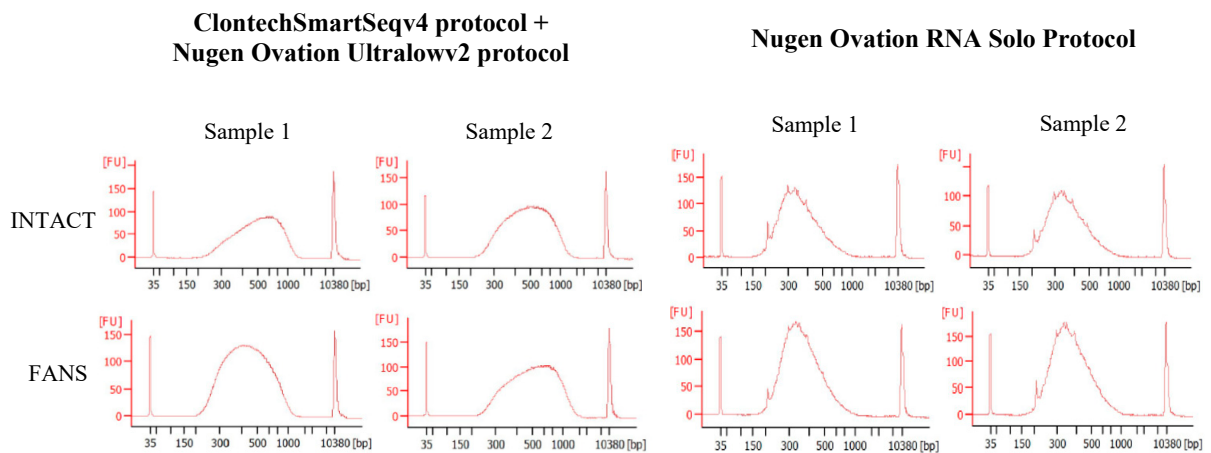

C

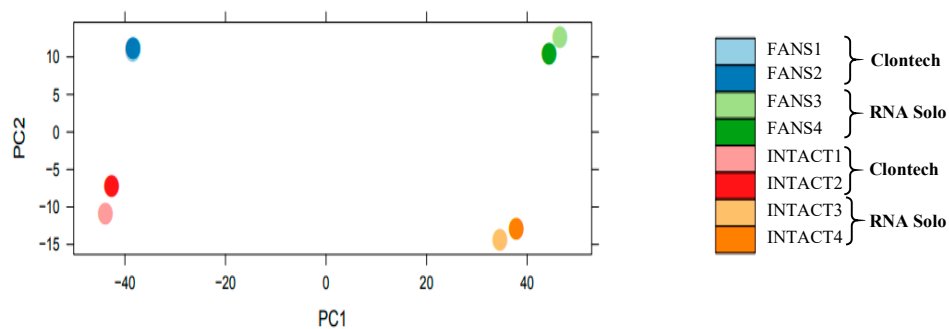

**Supplementary Figure S4.** Selection of RNA library preparation strategy. **A.** Bioanalyzer profile of hippocampus nuclei RNA ( $n=2$  INTACT and  $n=2$  FANS *per* library preparation). **B.** Bioanalyzer profile of amplified libraries using either Clontech Smartseq v4 protocol (Clontech)

in combination with Nugen Ovation ultralow2 (Nugen) or Nugen ovation RNA solo protocol.  
**C.** PCA clustering analysis of FANS and INTACT samples based on library preparation.

A

| Group 1              |     | Group 2              |     | Group 3              |     |
|----------------------|-----|----------------------|-----|----------------------|-----|
| Sample               | RIN | Sample               | RIN | Sample               | RIN |
| FANS 1               | 9.9 | FANS 1               | 4.2 | FANS 1               | 5.1 |
| FANS 2               | 9.9 | FANS 2               | 4.0 | FANS 2               | 5.7 |
| FANS 3               | 9.7 | FANS 3               | 6.1 | FANS 3               | 4.1 |
| FANS 4               | 8.0 | FANS 4               | 5.9 | FANS 4               | 5.2 |
| INTACT 1             | 7.6 | FANS 5               | 4.9 | FANS 5               | 5.3 |
| INTACT 2             | 8.6 | FANS 6               | 5.9 | FANS 6               | 4.9 |
| INTACT 3             | 7.4 | FANS 7               | 6.6 | FANS 7               | 6.1 |
| INTACT 4             | 6.3 | INTACT 1             | 7.5 | INTACT 1             | 4.4 |
|                      |     | INTACT 2             | 7   | INTACT 2             | 5.6 |
|                      |     | INTACT 3             | 5.9 | INTACT 3             | 6.1 |
|                      |     | INTACT 4             | 5.2 | INTACT 4             | 6.4 |
|                      |     | INTACT 5             | 6.7 | INTACT 5             | 5.8 |
| RIN Range: 6.3 - 9.9 |     | RIN Range: 4.0 - 7.5 |     | RIN Range: 4.1 - 6.4 |     |

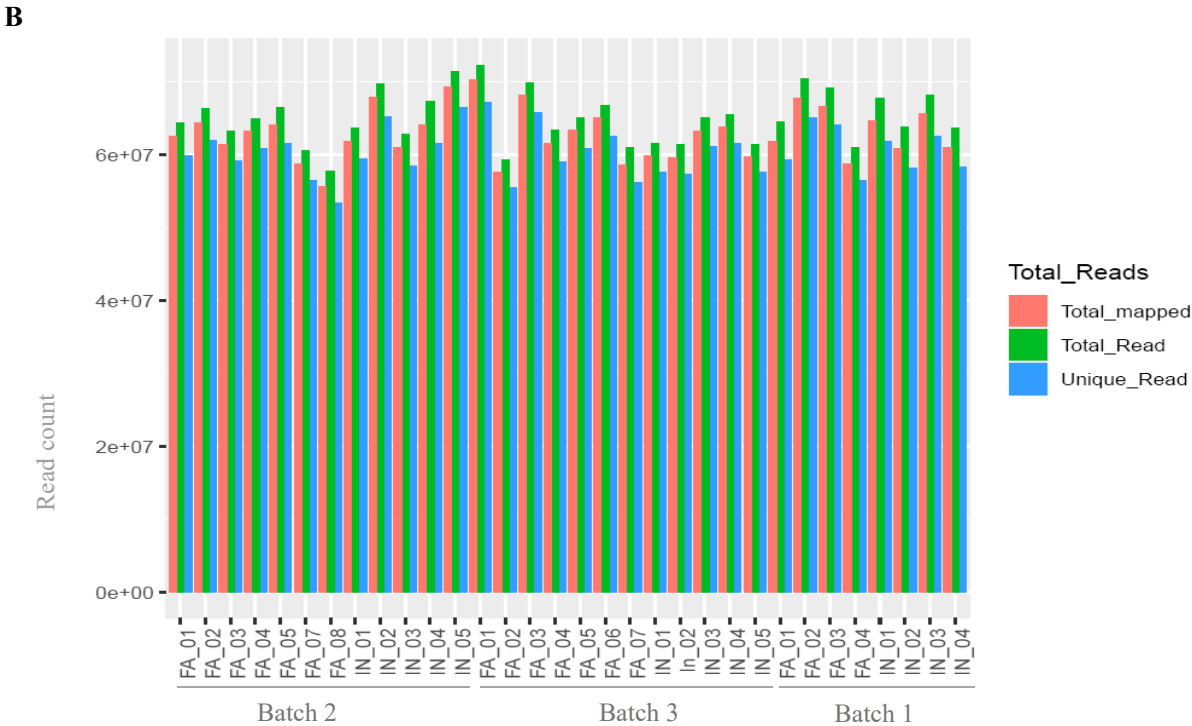

**Supplementary Figure S5.** Sequencing statistics of three batches with distinct RIN values. **A.** Individual RIN values of the sequenced samples and the total range of RIN values. **B.** Read count all of the samples including total reads, mapped reads and unique reads.

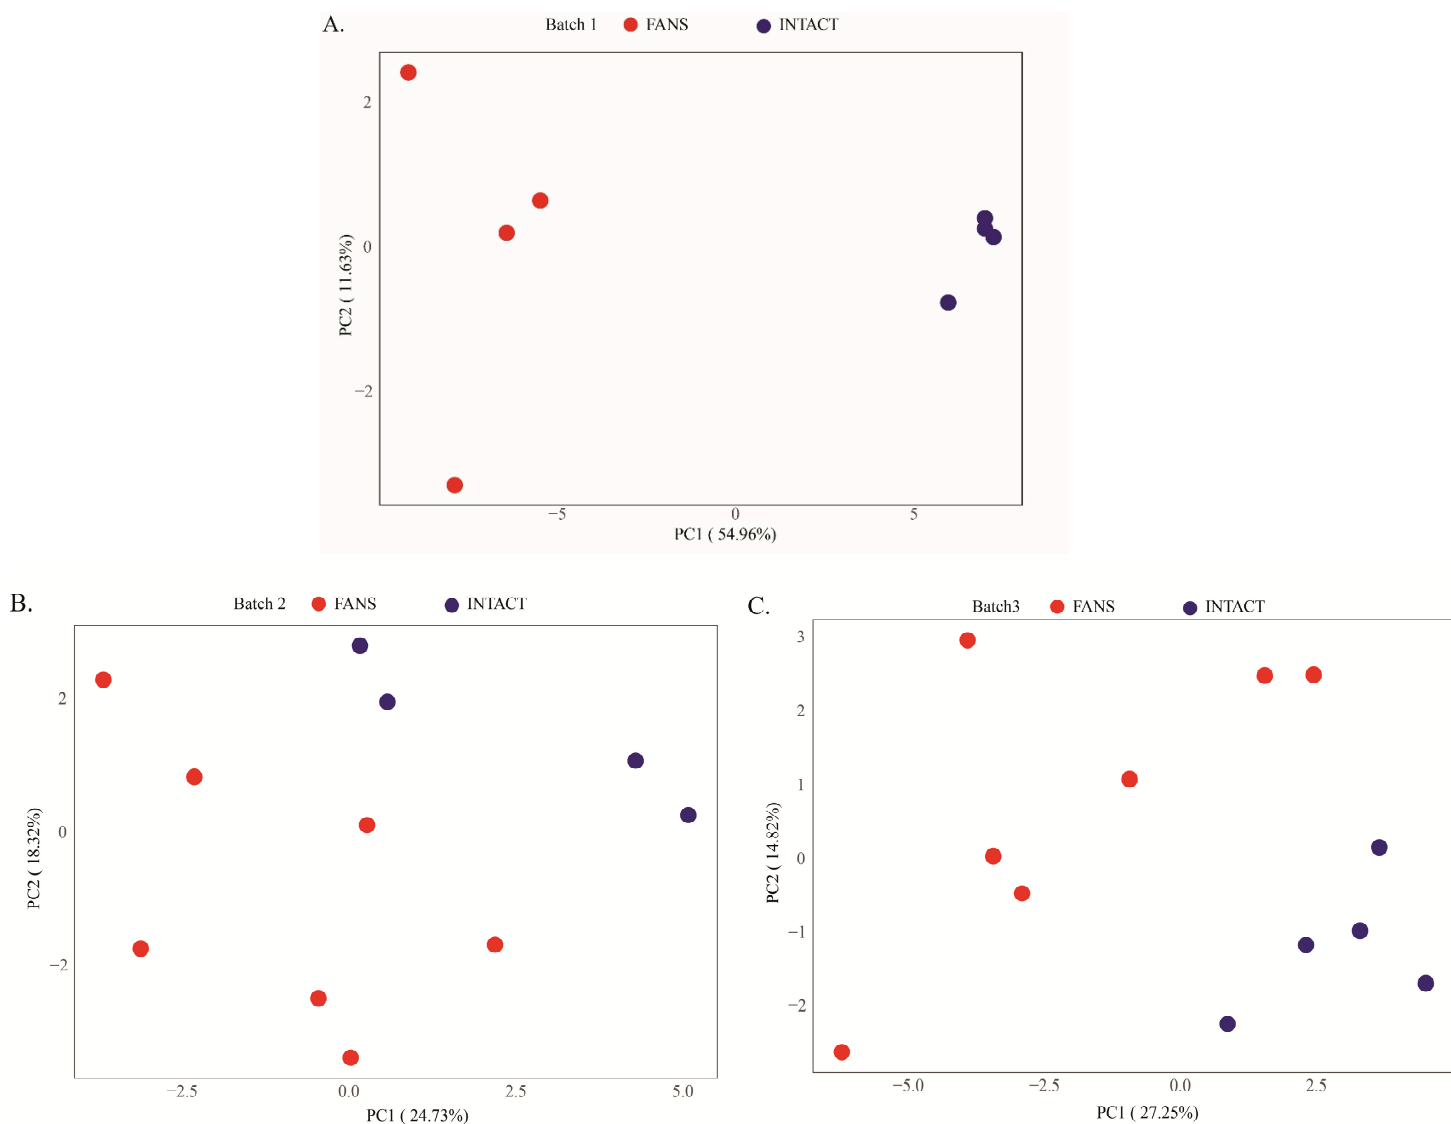

**Supplementary Figure S6.** Target gene and clustering comparison between the distinct batch samples. **A–C** Batch-specific PCA comparison of batch 1 (**A**), batch 2 (**B**) and batch 3 (**C**).

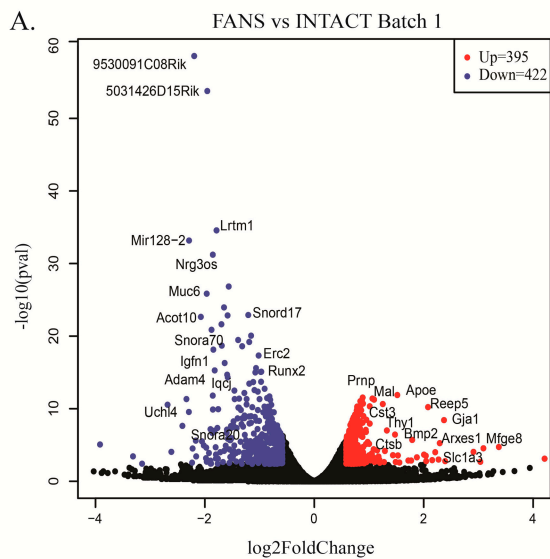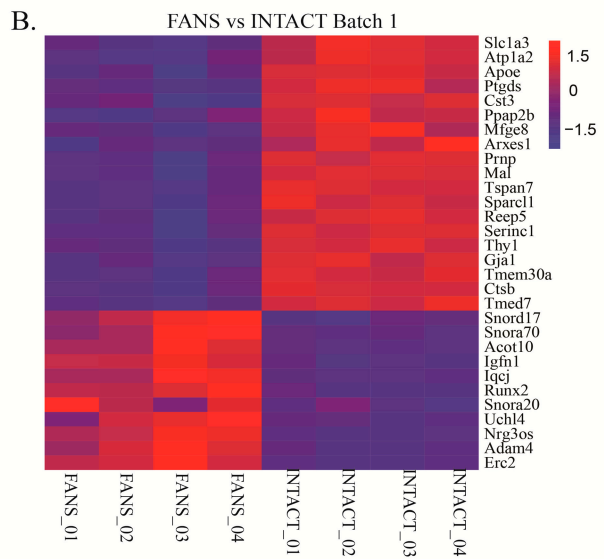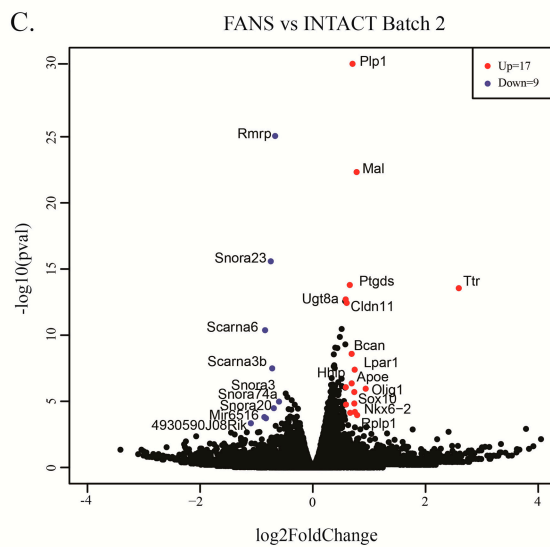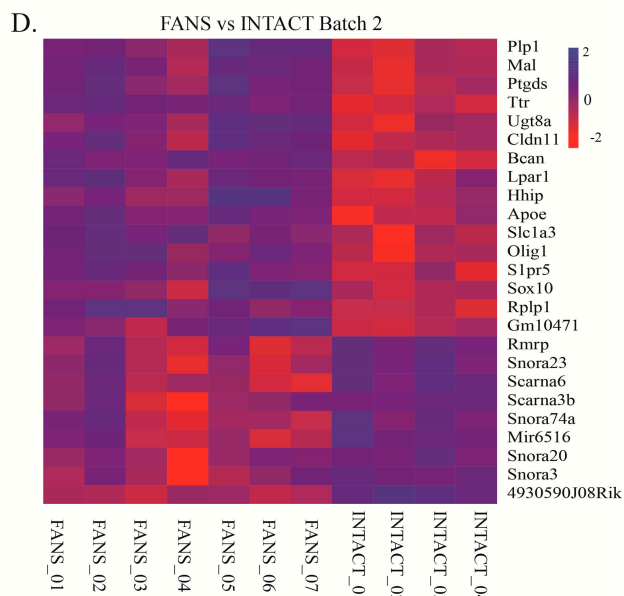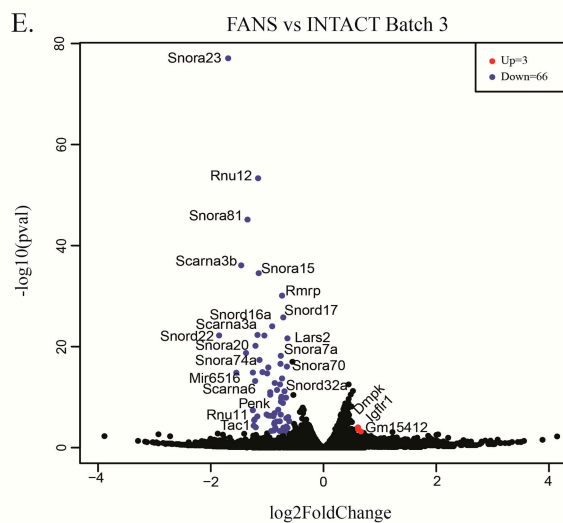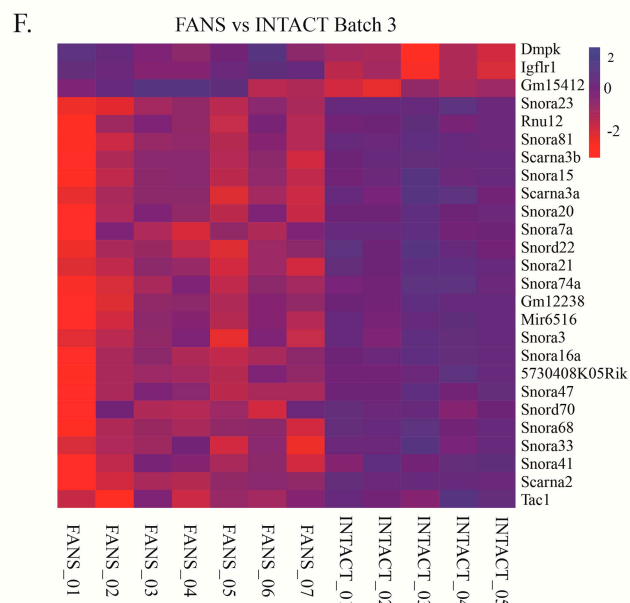



**Supplementary Figure S7.** Differentially expressed genes (DEGs) between INTACT and FANS. **A–F.** Volcano Plot and heat-map representing the DEGs of INTACT compared to FANS in batch 1 (**A,B**), batch 2 (**C,D**) and batch 3 (**E,F**). Only Snora20 was depleted INTACT compared to FANS, in all batches. (All batches represent 1.5 fold change  $p < 0.05$ ).

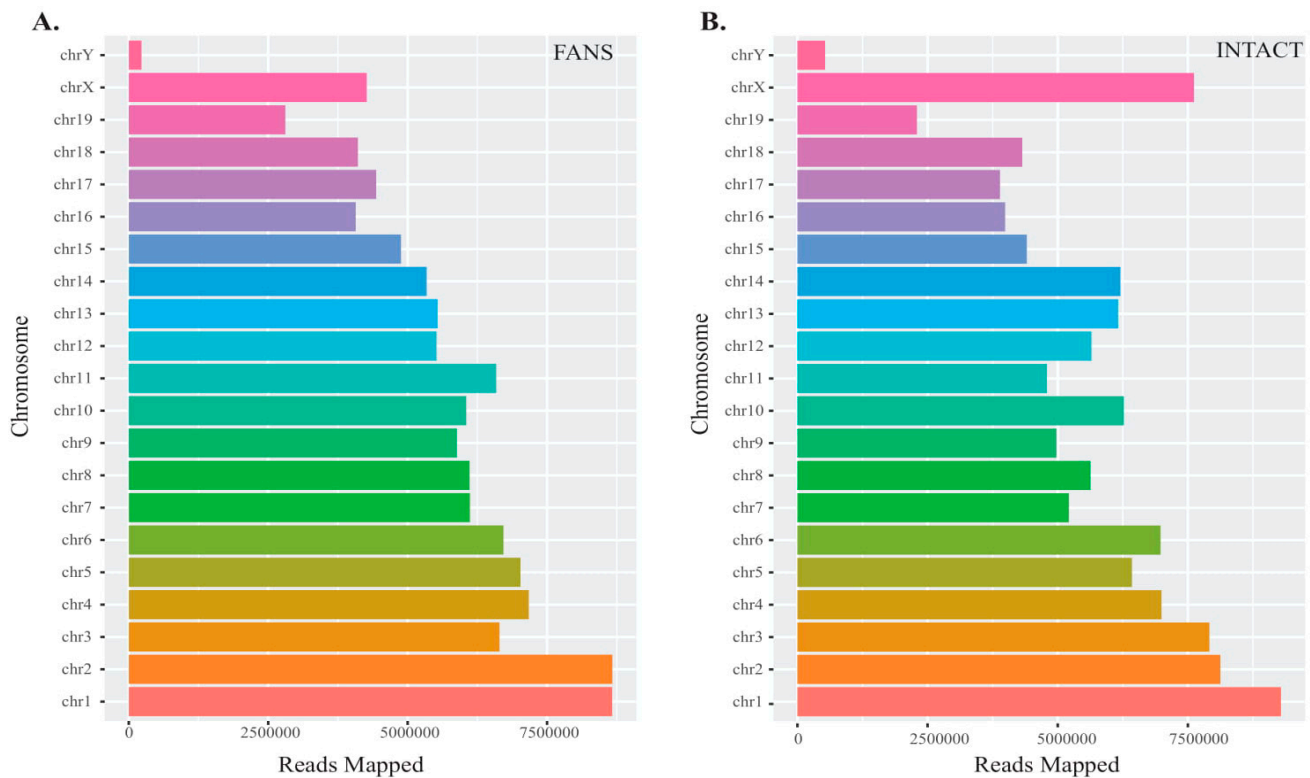

**Supplementary Figure S8.** FANS and INTACT ATAC-Seq reads mapped per chromosome.

**A. Gained accessibility peak motifs**

| Motif                                                                             | TF            | P-value | Fraction |
|-----------------------------------------------------------------------------------|---------------|---------|----------|
|  | TATA-Box(TBP) | 1e-2    | 30.00 %  |

**B. Reduced accessibility peak motifs**

| Motif                                                                               | TF        | P-value | Fraction |
|-------------------------------------------------------------------------------------|-----------|---------|----------|
|    | NRF       | 1e-10   | 21.10 %  |
|    | ETS       | 1e-9    | 24.24 %  |
|    | YY1       | 1e-8    | 7.23 %   |
|   | SP1       | 1e-7    | 41.43 %  |
|  | NFY       | 1e-5    | 29.56 %  |
|  | GFY- Staf | 1e-2    | 6.37 %   |

**Supplementary Figure S9.** Motif enrichment analysis at promoters regions of INTACT-gained accessibility (**A**) and INTACT-reduced accessibility (**B**) peak motifs.
