# Supplementary material for: INTACT vs. FANS for Cell-Type-Specific Nuclei Sorting: A Comprehensive Qualitative and Quantitative Comparison
Source: Int J Mol Sci. 2021 May 19;22(10):5335. doi: 10.3390/ijms22105335 (PMC8159132; doi:10.3390/ijms22105335)
Supplement: Supplementary file 1 [file ijms-22-05335-s001.zip]

Archive with 5 entries (5 files):
- ijms-1154486-supplementary.pdf
- Supplementary Table S1 - Literature-review data.xlsx
- Supplementary Table S2 - Group1_DEGs .xlsx
- Supplementary Table S3 - Differentially Accessible Region.xlsx
- Supplementary Table S4 Motifs.xlsx
