# Supplementary material for: INTACT vs. FANS for Cell-Type-Specific Nuclei Sorting: A Comprehensive Qualitative and Quantitative Comparison
Source: Int J Mol Sci. 2021 May 19;22(10):5335. doi: 10.3390/ijms22105335 (PMC8159132; doi:10.3390/ijms22105335)
Supplement: Supplementary file 1 [file ijms-22-05335-s001.zip › Supplementary Table S1 - Literature-review data.xlsx]

## Sheet: All data
Title	Relevance	Journal	Technique	Additional information	Tables
Table 1. Classification of Mo et al. 2015 citations for identification of relevant publication which use eiter FACS, FANS, INTACT or Both (INTACT and FACS/FANS). Citations were collected from 2016 up to 1.7.2020. The screeing include the title, relevance, Journal and use of technique. Only Relevant data was used for data analysis (See Analysis table)
Additional infotmation section: BioRxiv publications were classified into three sections
* The paper was published in peer reviewd journal (* shows the peer reviewd journal) ** The paper was not published in peer reviewed journal (** shows BioRxiv paper) *** The paper was published in peer reviewed journal but did not cite Mo et al. 2015 (*** shows BioRxiv paper)					*	**	***
					ref	not ref	not peer-rev	Total
					6	2	7	15
2016
A versatile Multisite Gateway‐compatible promoter and transgenic line collection for cell type‐specific functional genomics in Arabidopsis	Relevant	The plant journal	INTACT		2016
Substantial DNA methylation differences between two major neuronal subtypes in human brain	Relevant	Nucleic acids research	FACS		Relevant	Reference	Review	Other	Total
Chromatin immunoprecipitation and gene expression analysis of neuronal subtypes after fluorescence activated cell sorting	Relevant	Journal of Neuroscience methods	FACS		5	20	17	0	42
Cell-type specific open chromatin profiling in human postmortem brain infers functional roles for non-coding schizophrenia loci	Relevant	BIoRxiv	FANS	**
Epigenomic landscapes of retinal rods and cones	Relevant	eLife	Both		From relevant
Increased burden of ultra-rare protein-altering variants among 4,877 individuals with schizophrenia	Ref	Nature neuroscience			FANS	FACS	INTACT	Both	Total
Cerebral Organoids Recapitulate Epigenomic Signatures of the Human Fetal Brain	Ref	cell reports			1	2	1	1	5
The Role of Epigenetic Mechanisms in the Regulation of Gene Expression in the Nervous System	Ref	Journal of Neurosceince
Dynamic DNA methylation in the brain: a new epigenetic mark for experience-dependent plasticity	Ref	Frontiers in cellular Neuroscience			From FACS
Single-cell genome-wide bisulfite sequencing uncovers extensive heterogeneity in the mouse liver methylome	Ref	BMC genome Biology			FACS	FANS	Total
Shifting transcriptional machinery is required for long-term memory maintenance and modification in Drosophila mushroom bodies	Ref	Nature communication			1	1	2
Epigenetic assimilation in the aging human brain	Ref	BMC genome Biology
Genomic Views of Transcriptional Enhancers: Essential Determinants of Cellular Identity and Activity-Dependent Responses in the CNS	Ref	Journal of neuroscience research			Combination of nuclear FANS/FACS
Tissue-specific patterns of allelically-skewed DNA methylation	Ref	Epigenetics			FANS/FACS	INTACT	Both	Total
Neurofilament-labeled pyramidal neurons and astrocytes are deficient in DNA methylation marks in Alzheimer's disease	Ref	Neurobiology of aging			2	1	1	4
Dynamic DNA Methylation Regulates Levodopa-Induced Dyskinesia	Ref	Journal of Neuroscience
Impact of DNMT1 and DNMT3a forebrain knockout on depressive- and anxiety like behavior in mice	Ref	Neurobiology of learning and memory
Differential patterns of histone methylase EHMT2 and its catalyzed histone modifications H3K9me1 and H3K9me2 during maturation of central auditory system	Ref	Cell and tissue research
Longitudinal assessment of neuronal 3D genomes in mouse prefrontal cortex	Ref	Nature communication
Epigenetic mechanisms involved in the effects of stress exposure: focus on 5-hydroxymethylcytosine	Ref	Envirotnmantal epigenetics
Implications of Epigenetic Variability within a Cell Population for “Cell Type” Classification	Ref	Frontiers in behavioral neuroscience
Opposite Associations Between the rs3845446 Single-Nucleotide Polymorphism of the CACNA1E Gene and Postoperative Pain-Related Phenotypes in Gastrointestinal Surgery Versus Previously Reported Orthognathic Surgery	Ref	The journal of pain
Back to the past in schizophrenia genomics	Ref	Nature neuroscience
Cell fate restriction in Caenorhabditis elegans is orchestrated by precise chromatin organization and transcription factor activity	Ref	proquest
Epigenetic dysregulation in levodopa-induced dyskinesia	Ref	proquest
Epigenetic mechanisms in neurogenesis	Review	Nature reviews neuroscience
The landscape of DNA methylation amid a perfect storm of autism aetiologies	Review	Nature reviews neuroscience
Independent origins of neurons and synapses: insights from ctenophores	Review	The royal society
Turning over DNA methylation in the mind	Review	Frontiers in Neuroscience
New Perspectives on Genomic Imprinting, an Essential and Multifaceted Mode of Epigenetic Control in the Developing and Adult Brain	Review	Annual reviews in Neuroscience
DNA methylation dynamics in neurogenesis	Review	Future Medicine
Decoding the non‐coding genome: elucidating genetic risk outside the coding genome	Review	Genes Brain and Behaviour
Emerging Molecular and Biological Functions of MBD2, a Reader of DNA Methylation	Review	Frontiers in Genetics
Uncovering the Role of the Methylome in Dementia and Neurodegeneration	Review	Trends in Molecular Medicine
The Future is The Past: Methylation QTLs in Schizophrenia	Review	Genes
Biophysically Motivated Regulatory Network Inference: Progress and Prospects	Review	Human heredity
Single neuron transcriptome analysis can reveal more than cell type classification	Review	Bioessays
A Slice of the Suicidal Brain: What Have Postmortem Molecular Studies Taught Us?	Review	Current Psychiatry reports
Editing the Neuronal Genome: a CRISPR View of Chromatin Regulation in Neuronal Development, Function, and Plasticity	Review	Yale journal of biology and medicine
Epigenomic Landscapes Reflect Neuronal Diversity	Review	Neuron
Cell type‐specific epigenome profiling using affinity‐purified nuclei	Review	Genesis
Epigenomic Measurements in Brain Tissues	Review	Neuroscience in the 21st century
	Total Count (2016)	42
2017
Early-Life Gene Expression in Neurons Modulates Lasting Epigenetic States	Relevant	Cell	INTACT		2017
HDAC3 inhibition ameliorates spinal cord injury by immunomodulation	Relevant	Scientific reports	INTACT		Relevant	Reference	Review	Total
Single-cell methylomes identify neuronal subtypes and regulatory elements in mammalian cortex	Relevant	Science	FACS		12	36	18	66
An improved ATAC-seq protocol reduces background and enables interrogation of frozen tissues	Relevant	Nature methods	FACS
Cell Type-Specific Epigenomic Analysis Reveals a Uniquely Closed Chromatin Architecture in Mouse Rod Photoreceptors	Relevant	Scientific reports	FACS		From relevant
Biotin tagging of MeCP2 in mice reveals contextual insights into the Rett syndrome transcriptome	Relevant	Nature medicine	FACS		FANS	FACS	INTACT	Both	Total
cTag-PAPERCLIP Reveals Alternative Polyadenylation Promotes Cell-Type Specific Protein Diversity and Shifts Araf Isoforms with Microglia Activation	Relevant	Neuron	FACS		0	8	2	2	12
Cis-regulatory landscapes of four cell types of the retina	Relevant	Nucleic acids research	FACS
The Transcriptional Logic of Mammalian Neuronal Diversity	Relevant	BIoRxiv	FACS	***	From FACS
Dysregulation of Cortical Neuron DNA Methylation Profile in Autism Spectrum Disorder	Relevant	Cerebral cortex	FACS		FACS	FANS	Total
Simultaneous Transcriptional and Epigenomic Profiling from Specific Cell Types within Heterogeneous Tissues In Vivo	Relevant	Cell reports	Both		4	4	8
Layer-specific chromatin accessibility landscapes reveal regulatory networks in adult mouse visual cortex	Relevant	eLife	Both
The BRAIN Initiative Cell Census Consortium: Lessons Learned toward Generating a Comprehensive Brain Cell Atlas	Ref	Neuron			Combination of nuclear FANS/FACS
Neuronal activity modifies the chromatin accessibility landscape in the adult brain	Ref	Nature neruoscience			FANS/FACS	INTACT	Both	Total
The Dynamic Epigenetic Landscape of the Retina During Development, Reprogramming, and Tumorigenesis	Ref	Neuron			4	2	2	8
BECon: a tool for interpreting DNA methylation findings from blood in the context of brain	Ref	Translational Psyciatry
DNA N6-methyladenine is dynamically regulated in the mouse brain following environmental stress	Ref	Nature communication
Dissecting Cell-Type Composition and Activity-Dependent Transcriptional State in Mammalian Brains by Massively Parallel Single-Nucleus RNA-Seq	Ref	Molecular cell
Dynamic Gene Regulatory Networks of Human Myeloid Differentiation	Ref	Cell systems
5-hydroxymethylcytosine accumulation in postmitotic neurons results in functional demethylation of expressed genes	Ref	PNAS
MeDeCom: discovery and quantification of latent components of heterogeneous methylomes	Ref	BMC genome biology
Muscle Stem Cells Undergo Extensive Clonal Drift during Tissue Growth via Meox1-Mediated Induction of G2 Cell-Cycle Arrest	Ref	cell stem cell
Allele-specific non-CG DNA methylation marks domains of active chromatin in female mouse brain	Ref	PNAS
Isoform-Specific Expression and Feedback Regulation of E Protein TCF4 Control Dendritic Cell Lineage Specification	Ref	Immunity
Transcriptomic correlates of neuron electrophysiological diversity	Ref	Plos Comutational biology
Mapping cell type-specific transcriptional enhancers using high affinity, lineagespecific Ep300 bioChIP-seq	Ref	eLife
Functional analysis of rare variants found in schizophrenia implicates a critical role for GIT1–PAK3 signaling in neuroplasticity	Ref	Molecular Psychiatry
An HDAC3-PROX1 corepressor module acts on HNF4α to control hepatic triglycerides	Ref	Nature communication
Sexually divergent DNA methylation patterns with hippocampal aging	Ref	Aging cell
Genome-Wide Target Analyses of Otx2 Homeoprotein in Postnatal Cortex	Ref	Frontiers in Neuroscience
Tissue-specific DNA methylation is conserved across human, mouse, and rat, and driven by primary sequence conservation	Ref	BMC genomics
Genome-Wide Identification of Basic Helix–Loop–Helix and NF-1 Motifs Underlying GR Binding Sites in Male Rat Hippocampus	Ref	Endocrinology
Tracking the evolution of epialleles during neural differentiation and brain development: D-Aspartate oxidase as a model gene	Ref	Epigenetics and chromatin
Loss of Protein Arginine Methyltransferase 8 Alters Synapse Composition and Function, Resulting in Behavioral Defects	Ref	Journal of Neuroscience
Spatiotemporal DNA Methylome Dynamics of the Developing Mammalian Fetus	Ref	BIoRxiv
Neuronal brain region-specific DNA methylation and chromatin accessibility are associated with neuropsychiatric disease heritability	Ref	BIoRxiv
Location matters: distinct DNA methylation patterns in GABAergic interneuronal populations from separate microcircuits within the human hippocampus	Ref	Human molecular Genetics
Computational training for the next generation of neuroscientists	Ref	Current opinion in Neurobiology
A putative role for genome-wide epigenetic regulatory mechanisms in Huntington’s disease: A computational assessment	Ref	F1000 research
Most brain disease-associated and eQTL haplotypes are not located within transcription factor DNase-seq footprints in brain	Ref	Human molecular Genetics
The emerging landscape of in vitro and in vivo epigenetic allelic effects	Ref	F1000 research
Chapter 5 - Beyond mCG: DNA Methylation in Noncanonical Sequence Context	Ref	DNA modification in the Brain
Sexually divergent DNA methylation programs with hippocampal aging	Ref	BIoRxiv
Analysis of hippocampal transcriptomic responses to technical and biological perturbations	Ref	BIoRxiv
Generation of Neuronal Diversity in the Peripheral Olfactory System in Drosophila	Ref	Decoding Neural Circuit Structure and Function
sNucDrop-Seq: Dissecting cell-type composition and neuronal activity state in mammalian brains by massively parallel single-nucleus RNA-Seq	Ref	BIoRxiv
Analysis of hippocampal transcriptomic responses to technical and biological perturbations	Ref	BIoRxiv
Using Systems Biology Approaches to Study Epigenetic Regulation on Chicken Embryonic Cell Fate Decision	Ref
Genetic and activity-dependent mechanisms underlying interneuron diversity	Review	Nature reviews neruoscience
Epigenetics of Atherosclerosis: Emerging Mechanisms and Methods	Review	Trends in molecular medicnie
Nerve Growth Factor and Pain Mechanisms	Review	Annual review of Neruoscience
Neurotrophic factors and their inhibitors in chronic pain treatment	Review	Neurobiology of Disease
The Crucial Role of DNA Methylation and MeCP2 in Neuronal Function	Review	Genes
Neuropathology of suicide: recent findings and future directions	Review	Molecular Psychiatry
DNA modifications in models of alcohol use disorders	Review	Alcohol
Neuroepigenetic mechanisms in disease	Review	Epigenetics and chromatin
Epigenetic Etiology of Intellectual Disability	Review	Journal of Neuroscience
Epigenetic research in multiple sclerosis: progress, challenges, and opportunities	Review	Physiological Genomics
DNA Methylation Dynamics and Cocaine in the Brain: Progress and Prospects	Review	Genes
Neurobiological basis for pain vulnerability: why me?	Review	Pain
Chromatin Switches during Neural Cell Differentiation and Their Dysregulation by Prenatal Alcohol Exposure	Review	Genes
Epigenetics of cell fate reprogramming and its implications for neurological disorders modelling	Review	Neurobiology of disease
Histone H2A Monoubiquitination in Neurodevelopmental Disorders	Review	Trends in Genetics
Enzymatic methods for genome-wide profiling of protein binding sites	Review	Briefings in Functional genomics
Epigenomics of Retinal Development in Mice and Humans	Review	Neuron
Regulation of neuronal survival by DNA methyltransferases	Review	Neural regeneration research
	Total Count (2017)	66
2018
Profiling of Accessible Chromatin Regions across Multiple Plant Species and Cell Types Reveals Common Gene Regulatory Principles and New Control Modules	Relevant	The Plant cell	INTACT		2018
Nuclear Transcriptomes at High Resolution Using Retooled INTACT	Relevant	Plant Physiology	INTACT		Relevant	Reference	Review	Total
Cell Type-Specific Profiling of Chromatin Modifications and Associated Proteins	Relevant	Plant chromatin dynamics	INTACT		13	35	19	67
A unique role for DNA (hydroxy)methylation in epigenetic regulation of human inhibitory neurons	Relevant	Science	FANS
Single-nucleus analysis of accessible chromatin in developing mouse forebrain reveals cell-type-specific transcriptional regulation	Relevant	Nature neuroscience	FACS	*	From relevant
Transcriptional and epigenomic landscapes of CNS and non-CNS vascular endothelial cells	Relevant	eLife	FACS		FANS	FACS	INTACT	Both	Total
Cell-type-specific brain methylomes profiled via ultralow-input microfluidics	Relevant	Nature biomedical engineering	FACS		1	7	3	2	13
Low-input and multiplexed microfluidic assay reveals epigenomic variation across cerebellum and prefrontal cortex	Relevant	Science	FACS
Characterization of human mosaic Rett syndrome brain tissue by single-nucleus RNA sequencing	Relevant	Nature neuroscience	FACS		From FACS
Species and cell-type properties of classically defined human and rodent neurons and glia	Relevant	elife	FACS		FACS	FANS	Total
Phenotypic convergence in the brain: distinct transcription factors regulate common terminal neuronal characters	Relevant	BIoRxiv	FACS	**	2	5	7
TRAP-seq identifies cystine/glutamate antiporter as a driver of recovery from liver injury	Relevant	Journal of Clinical Investigation	Both
Transcriptional Profiling of Somatostatin Interneurons in the Spinal Dorsal Horn	Relevant	Scientific reports	Both		Combination of nuclear FANS/FACS
Enhancer redundancy provides phenotypic robustness in mammalian development	Ref	Nature			FANS/FACS	INTACT	Both	Total
The chromatin accessibility landscape of primary human cancers	Ref	Science			6	3	2	11
Epigenetic Regulation of the Kappa Opioid Receptor by Child Abuse	Ref	Biological psychiatry
Environmental enrichment increases transcriptional and epigenetic differentiation between mouse dorsal and ventral dentate gyrus	Ref	Nature communication
Microglia from offspring of dams with allergic asthma exhibit epigenomic alterations in genes dysregulated in autism	Ref	Glia
Brain Transcriptome Databases: A User's Guide	Ref	Journal of Neuroscience
Nondestructive, base-resolution sequencing of 5-hydroxymethylcytosine using a DNA deaminase	Ref	Nature biotechnology
Single-cell transcriptomics of the developing lateral geniculate nucleus reveals insights into circuit assembly and refinement	Ref	PNAS
Focusing on the Opioid System for Addiction Biomarker Discovery	Ref	Trends in Molceular Medicine
The State of the NIH BRAIN Initiative	Ref	Journal of Neuroscience
Robust single-cell DNA methylome profiling with snmC-seq2	Ref	Nature communication
Regulation of Neuroregeneration by Long Noncoding RNAs	Ref	Moelcular cell
Parallel Development of Chromatin Patterns, Neuron Morphology, and Connections: Potential for Disruption in Autism	Ref	Frontiers in Neuroanatomy
Developmental Chromatin Restriction of Pro‐Growth Gene Networks Acts as an Epigenetic Barrier to Axon Regeneration in Cortical Neurons	Ref	Developmental Neurobiology
Exome-wide analysis of mutational burden in patients with typical and atypical Rolandic epilepsy	Ref	European journal of Human genetics
CNTNAP2 stabilizes interneuron dendritic arbors through CASK	Ref	Molecular Psychiatry
Foxd1 is required for terminal differentiation of anterior hypothalamic neuronal subtypes	Ref	Developmental biology
Integrative inference of brain cell similarities and differences from single-cell genomics	Ref	bioRxiv
Long genes linked to autism spectrum disorders harbor broad enhancer-like chromatin domains	Ref	Genome research
Activity-Induced Regulation of Synaptic Strength through the Chromatin Reader L3mbtl1	Ref	Cell reports
A transcription factor collective defines the HSN serotonergic neuron regulatory landscape	Ref	elife
Non-cell Autonomous OTX2 Homeoprotein Regulates Visual Cortex Plasticity Through Gadd45b/g	Ref	Cerbral cortex
Chapter Six - Central Neuroepigenetic Regulation of the Hypothalamic–Pituitary–Adrenal Axis	Ref	Progress in Molecular Biology and Transliation Science
Cocaine-induced epigenetic DNA modification in mouse addiction-specific and non-specific tissues	Ref	Neuropharmacology
SArKS: de novo discovery of gene expression regulatory motifs and domains by suffix array kernel smoothing	Ref	bioRxiv
Negative Evidence for a Functional Role of Neuronal DNMT3a in Persistent Pain	Ref	Frontiers in Molecular Neuroscience
Heritability enrichment in open chromatin reveals cortical layer contributions to schizophrenia	Ref	bioRxiv
Differential gene regulatory plasticity between upper and lower layer cortical excitatory neurons	Ref	Molecular and cellular neuroscience
Targeted deletion of an NRL- and CRX-regulated alternative promoter specifically silences FERM and PDZ domain containing 1 (Frmpd1) in rod photoreceptors	Ref	Human molecular genetics
Auditory-induced response in the primary sensory cortex of rodents	Ref	Plos One
Non-CG methylation and multiple epigenetic layers associate child abuse with immune and small GTPase dysregulation	Ref	bioRxiv
Transcriptional Targets of CREB-Regulated Transcription Coactivator 1 (CRTC1) During Hippocampal Plasticity	Ref	Proquest
Spectral Learning of Binomial HMMs for DNA Methylation Data	Ref	Cornell University
Cell-type-specific interrogation of CeA Drd2 neurons to identify targets for pharmacological modulation of fear extinction	Ref	Translational Psychiatry
Experience‐dependent transcriptional regulation in juvenile brain development	Ref
Intrinsic mechanisms of neuronal axon regeneration	Review	Nature reviews neuroscince
Review: adult neurogenesis contributes to hippocampal plasticity	Review	Cell and tissue research
Rett syndrome: insights into genetic, molecular and circuit mechanisms	Review	Nature reviews neuroscince
Importance of the brain corticosteroid receptor balance in metaplasticity, cognitive performance and neuro-inflammation	Review	Fronties in Neuroendicrinology
Activity-Regulated Transcription: Bridging the Gap between Neural Activity and Behavior	Review	Neuron
Chromatin Regulation of Neuronal Maturation and Plasticity	Review	Trends in Neurosciences
DNA-Methylation: Master or Slave of Neural Fate Decisions?	Review	Frontiers in Neuroscience
Analysis of DNA modifications in aging research	Review	GeroScience
Epigenetics applied to psychiatry: Clinical opportunities and future challenges	Review	Europe PMC
Past, present and future of epigenetics in brain sexual differentiation	Review	Journal of Neuroendocrinology
Laser microdissection: A powerful tool for genomics at cell level	Review	Molecular Aspects of Medicine
The Role of Activity-Dependent DNA Demethylation in the Adult Brain and in Neurological Disorders	Review	Frontiers in Molecular Neuroscience
Neuroimaging Epigenetics: Challenges and Recommendations for Best Practices	Review	Neuroscience
Diverse facets of cortical interneuron migration regulation – Implications of neuronal activity and epigenetics	Review	Brain research
Strength in diversity: Understanding the pathways to herpes simplex virus reactivation	Review	Virology
Gene regulatory mechanisms underlying sex differences in brain development and psychiatric disease	Review	Annals of the new yourk academy of science
Epigenetic and Transcriptional Pre-patterning—An Emerging Theme in Cortical Neurogenesis	Review	Frontiers in Neuroscience
Epigenetic Landscapes of the Adversity-Exposed Brain	Review	Progress in Molecular Biology and Transliation Science
Epigenetic Programming Effects of Early Life Stress: A Dual-Activation Hypothesis	Review	current genomics
	Total Count (2018)	67
2019
Long-range Pitx2c enhancer–promoter interactions prevent predisposition to atrial fibrillation	Relevant	PNAS	INTACT		2019
Loss of Dnmt3a dependent methylation in inhibitory neurons impairs neural function through a mechanism that impacts Rett syndrome	Relevant	BIoRxiv	INTACT	***	Relevant	Reference	Review	Total
A scalable platform for the development of cell-type-specific viral drivers	Relevant	eLife	INTACT	*	32	43	15	90
PAN-INTACT enables direct isolation of lineage-specific nuclei from fibrous tissues	Relevant	Plos One	INTACT
ARNT2 Tunes Activity-Dependent Gene Expression through NCoR2-Mediated Repression and NPAS4-Mediated Activation	Relevant	Neuron	INTACT
Adapting INTACT to analyse cell-type-specific transcriptomes and nucleocytoplasmic mRNA dynamics in the Arabidopsis embryo	Relevant	Plant reproduction	INTACT		From relevant
YAP Partially Reprograms Chromatin Accessibility to Directly Induce Adult Cardiogenesis In Vivo	Relevant	Developmental cell	INTACT		FANS	FACS	INTACT	Both	Total
Inducible cell-specific mouse models for paired epigenetic and transcriptomic studies of microglia and astroglia	Relevant	BioRxiv	INTACT	**	5	16	8	3	32
Divergent neuronal DNA methylation patterns across human cortical development reveal critical periods and a unique role of CpH methylation	Relevant	BMC biology	FANS	*
Immediate and deferred epigenomic signatures of in vivo neuronal activation in mouse hippocampus	Relevant	Nature neuroscience	FANS		From FACS
The accessible chromatin landscape of the hippocampus at single-cell resolution	Relevant	Genome research	FANS	*	FACS	FANS	Total
In vivo nuclear capture and molecular profiling identifies Gmeb1 as a transcriptional regulator essential for dopamine neuron function	Relevant	Nature communication	FANS		9	7	16
Polycomb-mediated repression compensates for loss of postnatal DNA methylation in excitatory neurons	Relevant	BioRxiv	FANS	INTACT mouse bakcground/ **
Global DNA methylation remodeling during direct reprogramming of fibroblasts to neurons	Relevant	eLife	FACS		Combination of nuclear FANS/FACS
Mapping the transcriptional diversity of genetically and anatomically defined cell populations in the mouse brain	Relevant	eLife	FACS		FANS/FACS	INTACT	Both	Total
cisTopic: cis-regulatory topic modeling on single-cell ATAC-seq data	Relevant	Nature methods	FACS		12	8	3	23
Perinatal Lead (Pb) Exposure and Cortical Neuron-Specific DNA Methylation in Male Mice	Relevant	Genes	FACS
Comparative transcriptomic and epigenomic analysis identifies key regulators of injury response and neurogenic competence in retinal glia.	Relevant	BIoRxiv	FACS	***
Epigenomic analysis of Parkinson’s disease neurons identifies Tet2 loss as neuroprotective	Relevant	BIoRxiv	FACS	***
Tagger—A Swiss army knife for multiomics to dissect cell type–specific mechanisms of gene expression in mice	Relevant	Plos biology	FACS
Cross-species transcriptomic and epigenomic analysis reveals key regulators of injury response and neuronal regeneration in vertebrate retinas	Relevant	BIoRxiv	FACS	***
Cis-regulatory basis of sister cell type divergence in the vertebrate retina	Relevant	eLIfe	FACS
Genomic and epigenomic mapping of leptin-responsive neuronal populations involved in body weight regulation	Relevant	Nature metabolism	FACS
Single cell ATAC-seq identifies broad changes in neuronal abundance and chromatin accessibility in Down Syndrome	Relevant	BIoRxiv	FACS	***
Tanycyte-Independent Control of Hypothalamic Leptin Signaling	Relevant	Frontiers in Neuroscience	FACS
Prospective, brain-wide labeling of neuronal subclasses with enhancer-driven AAVs	Relevant	BIoRxiv	FACS	***
Single nucleus multi-omics links human cortical cell regulatory genome diversity to disease risk variants	Relevant	BioRxiv	FACS	**
DNA methylation in AgRP neurons regulates voluntary exercise behavior in mice	Relevant	Nature communication	FACS
Fatty acid synthesis in satellite glial cell promotes regenerative growth in sensory neurons	Relevant	BioRxiv	FACS	INTACT mouse line
The enteric nervous system of the human and mouse colon at a single-cell resolution	Relevant	BIoRxiv	Both	***
Transcriptional profile of spinal dynorphin-lineage interneurons in the developing mouse	Relevant	Pain	Both
Enabling cell-type-specific behavioral epigenetics in Drosophila: a modified high-yield INTACT method reveals the impact of social environment on the epigenetic landscape in dopaminergic neurons	Relevant	BMC biology	Both	*
Estrogen Drives Melanocortin Neurons To Reduce Sedentary Behavior	Ref	BIoRxiv
PROFILING NEURONAL EPIGENOMES IN A MOUSE MODEL OF ALCOHOL USE DISORDER	Ref	elibrary
Chemical Compounds Targeting DNA Methylation and Hydroxymethylation	Ref	Springer
A viral toolkit for recording transcription factor-DNA interactions in live mouse tissues	Ref	BIoRxiv
The distinct methylation landscape of maturing neurons and its role in Rett syndrome pathogenesis	Ref	current opinion in Neurobiology
Decoding the transcriptional response to ischemic stroke in young and aged mouse brain	Ref	BIoRxiv
Deletion of a non-canonical promoter regulatory element causes loss of Scn1a expression and epileptic phenotypes in mice	Ref	BIoRxiv
Genome-wide effects of social status on DNA methylation in the brain of a cichlid fish, Astatotilapia burtoni	Ref	BMC genomics
Tamoxifen induction of Cre recombinase does not cause long-lasting or sexually divergent responses in the CNS epigenome or transcriptome: implications for the design of aging studies	Ref	GeroScience
Leveraging mouse chromatin data for heritability enrichment informs common disease architecture and reveals cortical layer contributions to schizophrenia	Ref	BIoRxiv
DNA Methylation in Neuronal Development and Disease	Ref	Springer
Functional Implications of Dynamic DNA Methylation for the Developing, Aging and Diseased Brain	Ref	Springer
Developmental changes and sex differences in DNA methylation and demethylation in hypothalamic regions of the mouse brain	Ref	Epigenetics
Transcriptional control of lung alveolar type 1 cell development and maintenance by NK homeobox 2-1	Ref	PNAS
Investigation of Gene Expression and DNA Methylation From Seven Different Brain Regions of a Crab-Eating Monkey as Determined by RNA-Seq and Whole-Genome Bisulfite Sequencing	Ref	Frontiers in Genetics
A transcription factor collective defines the HSN serotonergic neuron regulatory landscape	Ref	eLIfe
Single-Cell Multi-omic Integration Compares and Contrasts Features of Brain Cell Identity	Ref	Cell
Inhibitory interneurons distribute widely across the mouse thalamus and form ontogenetic spatial clusters	Ref	BIoRxiv
Epigenetic dysregulation of enhancers in neurons is associated with Alzheimer’s disease pathology and cognitive symptoms	Ref	Nature communication
Hippocampal transcriptomic responses to enzyme‐mediated cellular dissociation	Ref	Hippocampus
CNTNAP2 is targeted to endosomes by the polarity protein Par3	Ref	BIoRxiv
The accessible chromatin landscape of the murine hippocampus at single-cell resolution	Ref	Genome research
SArKS: de novo discovery of gene expression regulatory motif sites and domains by suffix array kernel smoothing	Ref	Bioinfromatics
Age, but Not Amyloidosis, Induced Changes in Global Levels of Histone Modifications in Susceptible and Disease-Resistant Neurons in Alzheimer’s Disease Model Mice	Ref	Frontiers in Aging Neuroscience
Functional Access to Neuron Subclasses in Rodent and Primate Forebrain	Ref	Cell reports
Assessment and site-specific manipulation of DNA (hydroxy-)methylation during mouse corticogenesis	Ref	Life Science Alliance
The CNTNAP2-CASK complex modulates GluA1 subcellular distribution in interneurons	Ref	Neuroscience letters
Retinal-input-induced epigenetic dynamics in the developing mouse dorsal lateral geniculate nucleus	Ref	Epigenetics and chromatin
The Problem of Non-Shared Environment in Behavioral Genetics	Ref	Behaviour genetics
Maternal immune activation impairs cognitive flexibility and alters transcription in frontal cortex	Ref	Neurobiology of Disease
Transposon-mediated, cell type-specific transcription factor recording in the mouse brain	Ref	BIoRxiv
The effects of early exposure to MK-801 during environmental enrichment on spatial memory, methamphetamine self-administration and cue-induced renewal in rats	Ref	Behavioural brain research
Neuronal brain-region-specific DNA methylation and chromatin accessibility are associated with neuropsychiatric trait heritability	Ref	Nature neuroscience
Native Chromatin Immunoprecipitation (N-ChIP) in Primary Cortical Rat Astrocytes	Ref	Astrocytes
Strength in diversity: functional diversity among olfactory neurons of the same type	Ref	Journal of Bioenergetics and Biomembranes
Auditory-induced response in the primary sensory cortex of rodents	Ref	Plos One
Targeted deletion of an NRL- and CRX-regulated alternative promoter specifically silences FERM and PDZ domain containing 1 (Frmpd1) in rod photoreceptors	Ref	Human molecular Genetics
HOME: a histogram based machine learning approach for effective identification of differentially methylated regions	Ref	BMC Bioinfromatics
Prospective administration of anti-nerve growth factor treatment effectively suppresses functional connectivity alterations after cancer-induced bone pain in mice	Ref	Pain
Viral manipulation of functionally distinct neurons from mice to humans	Ref	BioRxiv
Transcriptional reprogramming of distinct peripheral sensory neuron subtypes after axonal injury	Ref	BioRxiv
Virtual methylome dissection facilitated by single-cell analyses	Ref	Epigenetic and chromatic
UHRF1-SRA recognizes symmetric non-CG methylated DNA through dual-flip out of 5-methyl cytosines	Ref	BioRxiv
The Molecular Basis of MeCP2 Function in the Brain	Review	JMB
Disentangling chromatin architecture to gain insights into the etiology of brain disorders	Review	Current opinion in Genetics and development
Emerging diverse roles of telocytes	Review	Development
Sex Differences in the Epigenome: A Cause or Consequence of Sexual Differentiation of the Brain?	Review	Genes
MeCP2: an epigenetic regulator of critical periods	Review	current opinion in Neurobiology
Signatures of sex: Sex differences in gene expression in the vertebrate brain	Review	Wire developmentla biology
Advances in the Profiling of Single‐Cell DNA Modifications	Review	small methods
Epigenetic mechanisms related to cognitive decline during aging	Review	Journal of neuroscience research
Recent advances in neuroepigenetic editing	Review	current opinion in Neurobiology
Transcriptional and Epigenomic Regulation of Adipogenesis	Review	ASM molecluar and cell biology
Epigenetic Regulations in Neuropsychiatric Disorders	Review	Frontiers in Genetics
Stem Cell Quiescence: Dynamism, Restraint, and Cellular Idling	Review	Cell stem cell
Cell-type-specific programs for activity-regulated gene expression	Review	Current opinion in Neurobiology
Genetic and epigenetic regulation of human aging and longevity	Review	Biochimica et Biophysica Acta (BBA) - Molecular Basis of Disease
Physiological and epigenetic features of Yoyo dieting and weight control	Review	Frontiers in Genetics
	Total Count (2019)	90
2020
A genetic, genomic, and computational resource for exploring neural circuit function	Relevant	eLife	INTACT		2020
Microglia and macrophages promote corralling, wound compaction and recovery after spinal cord injury via Plexin-B2	Relevant	Nature neuroscience	INTACT		Relevant	Reference	Review	Total
Losing Dnmt3a dependent methylation in inhibitory neurons impairs neural function by a mechanism impacting Rett syndrome	Relevant	eLife	INTACT		17	22	6	45
Cell Type-Specific Transcriptomics in the Plant Embryo Using an Adapted INTACT Protoco	Relevant	Plant embryogenesis	INTACT
An integrated transcriptomic and epigenomic atlas of mouse primary motor cortex cell types	Relevant	BioRxiv	FANS
Extraction of Distinct Neuronal Cell Types from within a Genetically Continuous Population	Relevant	Neuron	FANS		From relevant
Conserved and divergent features of DNA methylation in embryonic stem cell-derived neurons	Relevant	BioRxiv	FANS		FANS	FACS	INTACT	Both	Total
DNA Methylation Atlas of the Mouse Brain at Single-Cell Resolution	Relevant	BioRxiv	FANS		5	7	4	1	17
Epigenomic Diversity of Cortical Projection Neurons in the Mouse Brain	Relevant	BioRxiv	FANS	Notice descrption INTACT mice
A Chromatin Accessibility Atlas of the Developing Human Telencephalon	Relevant	Cell	FACS	Notice descrption INTACT mice	From FACS
The Dynamic Chromatin Architecture of the Regenerating Liver	Relevant	Cellular and Molecular Gastroenterology and Hepatology	FACS	Notice descrption INTACT mice	FACS	FANS	Total
Mouse c-Synuclein Promoter-Mediated Gene Expression and Editing in Mammalian Retinal Ganglion Cells	Relevant	The journal of Neuroscience	FACS		5	2	7
Decoding the Transcriptional Response to Ischemic Stroke in Young and Aged Mouse Brain	Relevant	Cell Reprot	FACS
Quantitative single-cell interactomes in normal and virus-infected mouse lungs	Relevant	Disease Models and Organisms	FACS
Neuronal non-CG methylation is an essential target for MeCP2 function	Relevant	BioRxiv	FACS		Combination of nuclear FANS/FACS
Enhancer viruses and a transgenic platform for combinatorial cell subclass-specific labeling	Relevant	BioRxiv	FACS		FANS	INTACT	Both	Total
An Activity-Mediated Transition in Transcription in Early Postnatal Neurons	Relevant	Neuron	Both		7	4	1	12
Stress-induced plasticity and functioning of ventral tegmental dopamine neurons	Review	Neuroscience & Biobehavioral Reviews
Copolymerization of single-cell nucleic acids into balls of acrylamide gel	Ref	Genome research
The Molecular Basis of MeCP2 Function in the Brain	Review	Journal of molecular biology
MeCP2 Represses Enhancers through Chromosome Topology-Associated DNA Methylation	Ref	Molecular Cell
Epigenetic mechanisms related to cognitive decline during aging	Review	Journal of Neuroscience research
Critical period regulation across multiple timescales	Ref	PNAS
Developmental changes and sex differences in DNA methylation and demethylation in hypothalamic regions of the mouse brain	Ref	Epigenetics
Signatures of sex: Sex differences in gene expression in the vertebrate brain	Review	Developmental Biology
A cell type‐specific expression map of NCoR1 and SMRT transcriptional co‐repressors in the mouse brain	Ref	Journal in systems neuroscience
Single cell epigenomic atlas of the developing human brain and organoids	Ref	BioRxiv
Enhancer-Driven Gene Expression (EDGE) enables the generation of cell type specific tools for the analysis of neural circuits	Review	Neurosience Research
Transcriptomic and epigenomic dynamics associated with development of human iPSC-derived GABAergic interneurons	Ref	Human molcular genetics
Canfam_GSD: De novo chromosome-length genome assembly of the German Shepherd Dog (Canis lupus familiaris) using a combination of long reads, optical mapping, and Hi-C	Ref	Giga n Science
Somatic Gain of KRAS Function in the Endothelium is Sufficient to Cause Vascular Malformations that Require MEK but not PI3K Signaling	Ref	Circulation research
A Role for PGC-1α in Transcription and Excitability of Neocortical and Hippocampal Excitatory Neurons	Ref	Neuroscience
A viral toolkit for recording transcription factor–DNA interactions in live mouse tissues	Ref	PNAS
MeCP2 and Chromatin Compartmentalization	Review	Cells
Epigenetic regulation of neuronal cell specification inferred with single cell “Omics” data	Ref	Computational and Structural Biotechnology Journal
Sexually Dimorphic Behavioral Profile in a Transgenic Model Enabling Targeted Recombination in Active Neurons in Response to Ketamine and (2R,6R)-Hydroxynorketamine Administration	ref	International journal of molecular sciences
Diverse GABAergic neurons organize into subtype‐specific sublaminae in the ventral lateral geniculate nucleus	ref	Journal of Neurochemistry
CNTNAP2 is targeted to endosomes by the polarity protein PAR3	ref	European journal of Neuroscience
Targeting Subsets of Mammalian Neurons	ref	Neuroscience Insights
Chemical Compounds Targeting DNA Methylation and Hydroxymethylation	ref	Chemical epigenetics
Predictive modeling of single-cell DNA methylome data enhances integration with transcriptome data	ref	BioRxiv
Stress-induced epigenetic regulation of transcription in neocortical excitatory neurons drives depression-like behavior	ref	BioRxiv
Molecular characterization of selectively vulnerable neurons in Alzheimer’s Disease	ref	BioRxiv
Modular output circuits of the fastigial nucleus mediate diverse motor and nonmotor functions of the cerebellar vermis	Ref	BioRxiv
Dual midbrain and forebrain origins of thalamic inhibitory interneurons	ref	BioRxiv
	Total Count (2020)	45
	Total Count (2016-2019)	310

## Sheet: Analysis table
Title	Technqiue used (INTACT/FACS/FANS/Both)	Tissue	Cell type	Organism	Sample size	Subsequent analysis	Ref.	Use of Transgenics	Journal	FACS --> FANS
Table 2. Relevant publication which utilize INTAC/FACS/FANS/Both. The table provides information reagerding the technique, tissue,cell type, organism, sample size and sample size in the respective publication. The subsequent analysis section focuses on sequecning and quantitation techniques for measurment of transcrtiptomic and epigenomics features.
2016												Count 2016:	5
A versatile Multisite Gateway-compatible promoter and transgenic line collection for cell type-specific functional genomics in Arabidopsis	INTACT	Plant	Root cells (Arabidobsis thaliana)	Arabidopsis thaliana	1 g of root tips	RT-qPCR	Marquès-Bueno et al. 2016	Yes	The plant journal	INTACT	FACS	FANS
Cell-type specific open chromatin profiling in human postmortem brain infers functional roles for non-coding schizophrenia loci	FANS	Brain	Prefrotnral cortex (Homo spaines)	Homo sapiens	50mg tissue (NeuN+/-)	ATAC-seq	Fullard et al. 2016	No	BIoRxiv	FANS	1	1	2
Substantial DNA methylation differences between two major neuronal subtypes in human brain	FACS	Brain	Prefrontal cortex (Homo sapiens)	Homo sapiens	mOFC tissue	RT-qPCR , RNA-seq , DNA methylation analysis	Kozlenkov et al. 2016	No	Nucleic acid research	FANS
Chromatin immunoprecipitation and gene expression analysis of neuronal subtypes after fluorescence activated cell sorting	FACS	Brain	Neurons (Mus musculus)	Mus musculus	Nac	Rt-qPCR, ChIP	Fingersh and Homaincs 2016	Yes	Journal of Neuroscience methods	FACS
Epigenomic landscapes of retinal rods and cones	Both	Eye	Rod and cones (Mus musculus)	Mus musculus	2-4 retinas per experiment (>400 nuclei/experiment)	MethylC-seq, ATAC-seq, ChIP-seq, DNAseI-seq, RNA-seq	Mo et al. 2016	Yes	eLife	Both
2017												Count 2017:	12
HDAC3 inhibition ameliorates spinal cord injury by immunomodulation	INTACT	Brain	Spinal Cords (Mus musculus)	Mus musculus	Spinal cord	rt-qPCR	Kuboyama et al. 2017	Yes	Scientigfic reports	INTACT	FACS	FANS
Early-Life Gene Expression in Neurons Modulates Lasting Epigenetic States	INTACT	Brain	Pv and Vip neurons (Mus musculus)	Mus musculus	~10 million nuclei one animal cortex	ChIP-seq, MNAse-seq, WGBS,oxBS-seq, RNA-seq, scRNA-seq	Stroud et al. 2017	Yes	Cell	INTACT	4	4	8
Cis-regulatory landscapes of four cell types of the retina	FACS	Eye	Retina (Mus musculus)	Mus musculus	Single retina	RNA-seq, WGBS	Hartl et al. 2017	Yes	Nucleic acids research	FACS
An improved ATAC-seq protocol reduces background and enables interrogation of frozen tissues	FACS	Multiple	Primary blood cells, primary brain tissue, primary thyroid cancer tissue, and primary keratinocytes (Homo sapiens)	Homo sapiens	A frozen tissue fragment ∼20 mg	ATAC-seq	Corces et al. 2017	No	Nature methods	FANS
Single-cell methylomes identify neuronal subtypes and regulatory elements in mammalian cortex	FACS	Brain	Mouse frontal cortex (Mus musculus) and middle frontal gyrus (Homo sapiens)	Mus musculus and Homo sapiens	Cortex	scMeytlome analysis	Luo et al. 2017	Yes	Science	FANS
Cell Type-Specific Epigenomic Analysis Reveals a Uniquely Closed Chromatin Architecture in Mouse Rod Photoreceptors	FACS	Eye	Retina (Mus musculus)	Mus musculus	4-12 retinas	ATAC-seq, RNA-seq	Hughes et al. 2017	No	Scientific reports	FACS
Biotin tagging of MeCP2 in mice reveals contextual insights into the Rett syndrome transcriptome	FACS	Brain	Cotical tissue (Mus musculus)	Mus musculus	2-3 mice per biological replicate	ChIP, RNA-seq, RT-qPCR, Gro-seq	Johnson et al. 2017	Yes	Nature medicine	FANS
cTag-PAPERCLIP Reveals Alternative Polyadenylation Promotes Cell-Type Specific Protein Diversity and Shifts Araf Isoforms with Microglia Activation	FACS	Brain	microglia and peipheral blood cell (Mus musculus)	Mus musculus	Pooled 18 mice per group	RT-qPCR	Hwang et al. 2017	Yes	Neuron	FACS
Dysregulation of Cortical Neuron DNA Methylation Profile in Autism Spectrum Disorder	FACS	Brain	aPFC, BA10, BA9, BA8 brain tissue (Homo sapiens)	Homo sapiens	500mg liquid nitrogen pulverzied brain tissue	NGBS	Nardone et al. 2017	No	Cerebral cortex	FANS
The Transcriptional Logic of Mammalian Neuronal Diversity	FACS	Brain	Vaiour neuronal populations (Mus musculus)	Mus musculus	Micro-dissected tissues	RNA-seq, ATAC-seq	Sugino et al. 2017	Yes	BIoRxiv	FACS
Simultaneous Transcriptional and Epigenomic Profiling from Specific Cell Types within Heterogeneous Tissues In Vivo	Both	Adipose	white adipose tissue (Mus musculus)	Mus musculus	50-100 mg of frozen white adipose tissues	RNA-seq- INTACT, ChIP-seq -FACS	Roh et al .2017	Yes	Cell reports	Both
Layer-specific chromatin accessibility landscapes reveal regulatory networks in adult mouse visual cortex	Both	Multiple	mES and mouse cortices section (Mus musculus)	Mus musculus	Dissected brain cortices	ATAC-seq	Gray et al. 2017	Yes	eLife	Both
2018												Count 2018:	13
Profiling of Accessible Chromatin Regions across Multiple Plant Species and Cell Types Reveals Common Gene Regulatory Principles and New Control Modules	INTACT	Plant	Root cells (Arabidopsis thaliana)	Arabidopsis thaliana	1-3 g of root	ATAC-seq	Maher et al. 2018	Yes	The Plant cell	INTACT	FACS	FANS
Cell Type-Specific Profiling of Chromatin Modifications and Associated Proteins	INTACT	Plant	Root cells (Arabidobsis thaliana)	Arabidopsis thaliana	1.5 g of root tips	ChIP-seq	Morao et al. 2018	Yes	Plant chromatin cynamics	INTACT	2	5	7
Nuclear transcriptomes at high resolution using retooled INTACT	INTACT	Plant	Rice seeds (Oryza sativa japonica cv)	Oryza sativa	Seedlings were grown on plates (10 cm × 10 cm)	RNA-seq	Reynoso et al. 2018	Yes	Plant Physiology	INTACT
A unique role for DNA (hydroxy)methylation in epigenetic regulation of human inhibitory neurons	FANS	Brain	Prefrontal cortex (Homo sapiens)	Homo sapiens	750mg brain tissue	RNA-seq, ChIP-seq, DNA-methylation assay	Kozlenkov et al. 2018	No	Science Advances	FANS
Single-nucleus analysis of accessible chromatin in developing mouse forebrain reveals cell-type-specific transcriptional regulation	FACS	Brain	Cell culture and mouse forebrain (Mus musculus)	Mus musculus	10mg adult forebrain	ATAC-seq. scATAC-seq	Preissl etl a. 2018	No	Nature neuroscience	FANS
Transcriptional and epigenomic landscapes of CNS and non-CNS vascular endothelial cells	FACS	Multiple	mouse brain, liver, lung, and kidney Endothelial cells (Mus musculus)	Mus musculus	Whole tissue of interst	RNA-seq , ATAC-seq, Methlome-seq	Sabbagh et al. 2018	Yes	eLife	FACS
Species and cell-type properties of classically defined human and rodent neurons and glia	FACS	Brain	Cortex and cerebella (Mus musculus) RAT and Human frozen tissues	Mus musculus and Rattus norvegicus	Fresh or thawed tissue	RNA-seq, ATAC-seq	Xu et al. 2018	No	elife	FANS
Low-input and multiplexed microfluidic assay reveals epigenomic variation across cerebellum and prefrontal cortex	FACS	Brain	PFC and Cerebellum (Mus musculus)	Mus musculus	PFC or cerebellum tissue	ChIP-seq, mRNA-seq	Ma et al. 2018	No	Science	FANS
Cell-type-specific brain methylomes profiled via ultralow-input microfluidics	FACS	Brain	Frontal cortex and Cerebellum (Mus musculus)	Mus musculus	Frontal cortex and Cerebellum (NeuN+/-)	ssRRBS, RRBS, mRNA-seq	Ma et al. 2018	No	Nature biomedical engineering	FANS
Characterization of human mosaic Rett syndrome brain tissue by single-nucleus RNA sequencing	FACS	Brain	Mouse and Human cortex (Mus musuculus and Homo sapiens)	Mus musculus and Homo sapiens	Whole cortex	RNA-seq, ssRNA-seq	Renthal et al. 2018	Yes	Nature neuroscience	FANS
Phenotypic convergence in the brain: distinct transcription factors regulate common terminal neuronal characters	FACS	Brain	Optic lobes (Drosophila melanogaster)	Drosophila melanogaster	Optic lobes	scRNA-seq	Konstantinides et al. 2018	No	BIoRxiv	FACS
TRAP-seq identifies cystine/glutamate antiporter as a driver of recovery from liver injury	Both	Liver	Hepatocytes (Mus musculus)	Mus musculus	Whole Liver tissue	RNA-seq, ATAC-seq (FACS), ChIP-qPCR	Wang et al. 2018	Yes	Journal of Clinical Investigation	Both
Transcriptional Profiling of Somatostatin Interneurons in the Spinal Dorsal Horn	Both	Brain	Dorsal horn (Mus musculus)	Mus musculus	Dorsal segment	RNA-seq	Chamessian et al. 2018	Yes	Scietific reports	Both
2019												Count 2019:	32
ARNT2 Tunes Activity-Dependent Gene Expression through NCoR2-Mediated Repression and NPAS4-Mediated Activation	INTACT	Brain	CA1 pyramidal neurons (Mus musculus)	Mus musculus	50,000 CA1 pyramidal neurons	INTACT only for ATAC-seq, ChIP-seq, RNA-seq	Sharma et al. 2019	Yes	Neuron	INTACT	FACS	FANS
PAN-INTACT enables direct isolation of lineage-specific nuclei from fibrous tissues	INTACT	Heart	Heart (Mus musculus)	Mus musculus	Whole hearts	RNA-qPCR, ATAC-seq	Bhattacharyya et al. 2019	Yes	Plos One	INTACT	9	7	16
Adapting INTACT to analyse cell-type-specific transcriptomes and nucleocytoplasmic mRNA dynamics in the Arabidopsis embryo	INTACT	Plant	Arabidopsis embryo (Arabidopsis thaliana)	Arabidopsis thaliana	number of flowers from appropriate transgenic plant are emasculated based on expected yield of bead-bound nuclei	Microarray based approach	Palovara and Weijers 2019	Yes	Plant reproduction	INTACT
Long-range Pitx2c enhancer–promoter interactions prevent predisposition to atrial fibrillation	INTACT	Heart	Cardiomyocytes (mus musclus)	Mus musculus	Fresh cariac tissue	RNA-seq,ATAC-seq,ChIP-seq	Zhang et al. 2019	Yes	PNAS	INTACT
Loss of Dnmt3a dependent methylation in inhibitory neurons impairs neural function through a mechanism that impacts Rett syndrome	INTACT	Brain	Striatum (Mus musculus)	Mus musculus	Whole Striatum	RNA-seq, DNA methylation	Lavery et al. 2019	Yes	BIoRxiv	INTACT
A scalable platform for the development of cell-type-specific viral drivers	INTACT	Brain	interneuron: somatostatin (SST)-, vasoactive intestinal polypeptide (VIP)- and parvalbumin (PV)	Mus musculus	Whole cortex of adult mice for nuclei	INTACT for ATAC-seq	Hrvartin et al. 2019	Yes	eLIFe	INTACT
YAP Partially Reprograms Chromatin Accessibility to Directly Induce Adult Cardiogenesis In Vivo	INTACT	Heart	Cardiomyocytes	Mus musculus	Fresh cardiac tissue	RNA-seq, ATAC-seq, ChIP-seq	Monroe et al. 2019	Yes	Developmental cell	INTACT
Inducible cell-specific mouse models for paired epigenetic and transcriptomic studies of microglia and astroglia	INTACT	Brain	Astrocytes and microglia from brain	Mus musculus	Hemisected half-brain	OxBS-seq, RNA-seq, BSAS, RT-qPCR	Chucair-Elliott et al. 2019	Yes	BioRxiv	INTACT
Divergent neuronal DNA methylation patterns across human cortical development reveal critical periods and a unique role of CpH methylation	FANS	Brain	Prefrontal cortex (Homo sapiens)	Homo sapiens	100 - 300 mg of pulverized DLPFC tissue (Neun+/-)	WGBS, RNA-seq	Price et al. 2019	No	BMC biology	FANS
Immediate and deferred epigenomic signatures of in vivo neuronal activation in mouse hippocampus	FANS	Brain	Hippocampus (Mus musculus)	Mus musculus	Hippocampi	ATAC-seq, RNA-seq, ChIP-seq, Hi-C	Fernandez-Albert et al. 2019	Yes	Nature neuroscience	FANS
In vivo nuclear capture and molecular profiling identifies Gmeb1 as a transcriptional regulator essential for dopamine neuron function	FANS	Brain	Midbrain (Mus musculus)	Mus musculus	Frozen midbrains	RNA-seq, Low-input Dnase-seq	Tuesta et al. 2019	Yes	Nature communication	FANS
The accessible chromatin landscape of the hippocampus at single-cell resolution	FANS	Brain	Hippocampus (Mus musculus)	Mus musculus	single cells	scATAC-seq	Sinnamon et al. 2019	No	Genome research	FANS
Polycomb-mediated repression compensates for loss of postnatal DNA methylation in excitatory neurons	FANS	Brain	Frontal Cortex (Mus musculus)	Mus musculus	Frontal cortex NeuN+	RNA-seq, MethylC-seq, ChIP-seq	Li et al. 2019	Yes	BioRxiv	FANS
Global DNA methylation remodeling during direct reprogramming of fibroblasts to neurons	FACS	Multiple	induced neurons from fibroblast (Mus musculus)	Mus musculus	FAC-sorted for TauEGFP +cells	Methyl-seq	Luo et al. 2019	Yes	eLIFe	FACS
Mapping the transcriptional diversity of genetically and anatomically defined cell populations in the mouse brain	FACS	Brain	Different neuronal population	Mus musculus	Dissocatied brain and non-brain regions	scRNA-seq, ATAC-seq	Sugino et al. 2019	Yes	eLife	FACS
cisTopic: cis-regulatory topic modeling on single-cell ATAC-seq data	FACS	Cancer	Melanoma cultures	Homo sapiens	Two melanoma cell cultures	ATAC-seq, scATAC-seq	González-Blas et al. 2019	No	Nature methods	FACS
Tagger—A Swiss army knife for multiomics to dissect cell type–specific mechanisms of gene expression in mice	FACS	Brain	Nuclei tagged neruons	Mus musculus	hemispheres	MeDIP, RNA-seq, Ribo-Tag-seq	Kaczmarczyk et al. 2019	Yes	Plos biology	FANS
Perinatal Lead (Pb) Exposure and Cortical Neuron-Specific DNA Methylation in Male Mice	FACS	Brain	Cereberal cortex	Mus musculus	anti-NeuN purification	DNA methylation	Dou et al. 2019	Yes	Genes	FANS
Cross-species transcriptomic and epigenomic analysis reveals key regulators of injury response and neuronal regeneration in vertebrate retinas	FACS	Eye	Retinal rod and cons	Mus musculus, Gallus gallus, Danio rerio	Retina of different species	RNA-seq, ATAC-seq, scRNA-seq	Hoang et al. 2019	Yes	BIoRxiv	FACS
Genomic and epigenomic mapping of leptin-responsive neuronal populations involved in body weight regulation	FACS	Brain	Leptin responsisve neurons	Mus musculus	Five hypothalmi RNA-seq and ATAC-seq, Twnty hypothalmi for ChIP-seq, NeuN+/-	RNA-seq, ChIP-seq, ATAc-seq	Inoue et al. 2019	Yes	Nature metabolism	FANS
Tanycyte-Independent Control of Hypothalamic Leptin Signaling	FACS	Brain	Brain	Mus musculus	microdisscetion from brain	RT-qPCR, RNA-seq, scRNA-seq	Yoo et al. 2019	Yes	Frontiers in Neuroscience	FACS
Single cell ATAC-seq identifies broad changes in neuronal abundance and chromatin accessibility in Down Syndrome	FACS	Brain	Cortices of adult brain	Mus musculus	whole cotrx	ATAC-seq, scATAC-seq	Spektor et al. 2019	Yes	BIoRxiv	FANS
Comparative transcriptomic and epigenomic analysis identifies key regulators of injury response and neurogenic competence in retinal glia.	FACS	Brain	Retinal rod and cons	Mus musculus, Gallus gallus, Danio rerio	Retina of different species	RNA-seq, ATAC-seq, scRNA-seq	Hoang et al. 2019	Yes	BIoRxiv	FACS
Prospective, brain-wide labeling of neuronal subclasses with enhancer-driven AAVs	FACS	Brain	Cortical neuorns	Mus musculus	dissocated cortex	scATAC, scRNA-seq	Graybuck et al. 2019	Yes	BIoRxiv	FACS
Epigenomic analysis of Parkinson’s disease neurons identifies Tet2 loss as neuroprotective	FACS	Brain	Prefrontal cortex (Homo sapiens)	Homo sapiens	~250mg human brain tissue	DNA methylation, RNA-seq	Lee et al. 2019	Yes	BIoRxiv	FANS
Cis-regulatory basis of sister cell type divergence in the vertebrate retina	FACS	Eye	Retina (Mus musculus)	Mus musculus	2 retinas	ATAC-seq, Dnase-seq, RNA-seq	Murphy et al. 2019	Yes	eLIfe	FACS
Single nucleus multi-omics links human cortical cell regulatory genome diversity to disease risk variants	FACS	Brain	Front cortex (Homo sapiens	Homo sapiens	3 distnict individual frontal cortex, NeuN sorted	snATAC-seq, snmC2T-seq	Luo et al. 2019	No	BioRxiv	FANS
DNA methylation in AgRP neurons regulates voluntary exercise behavior in mice	FACS	Brain	Arcuate nucleus of the hypothalamus ARH (Mus musculus)	Mus musculus	ARH microdissection - NeuN+	Whole-genome bisulfite sequencing (WGBS), RNA-seq, RT-qPCR	MacKay et al. 2019	Yes	Nature communication	FANS
Fatty acid synthesis in satellite glial cell promotes regenerative growth in sensory neurons	FACS	Brain	L4 and L5 Dorsal root ganglia (DRGs) (Mus musculus)	Mus musculus	Brain tissue sections	scRNA-seq, qPCR	Avraham et al. 2019	Yes	BioRxiv	FACS
Enabling cell-type-specific behavioral epigenetics in Drosophila: a modified high-yield INTACT method reveals the impact of social environment on the epigenetic landscape in dopaminergic neurons	Both	Brain	Dopaminergic neurons	Drosophila melanogaster	200-250 heads	ChIP-seq (INTACT), RNA-seq(FACS)	Agrawal et al. 2019	Yes	BMC biology	Both
The enteric nervous system of the human and mouse colon at a single-cell resolution	Both	Multiple	Colon and brain (Mus musculus)	Mus musculus	Colon or brain tissues	scRNA-seq	Drokhlyansky et al. 2019	Yes	BIoRxiv	Both
Transcriptional profile of spinal dynorphin-lineage interneurons in the developing mouse	Both	Brain	spinal pDyn neurons (Mus musculus)	Mus musculus	3 developmental time points (postnatal day 7, 21, or 80)	RNA-seq	Serafin et al. 2019	Yes	Pain	Both
2020												Count 2019:	17
A genetic, genomic, and computational resource for exploring neural circuit function	INTACT	Brain	Heads (Drosophila melanogaster)	Drosophila melanogaster	100-500 ftozen heads	RNA-seq	Davis et al. 2020	Yes	eLife	INTACT	FACS	FANS
Microglia and macrophages promote corralling, wound compaction and recovery after spinal cord injury via Plexin-B2	INTACT	Brain	Spinal Cords (Mus musculus)	Mus musculus	Spinal cords pooled from 3 animals	RNA-seq, RT-qPCR	Zhou et al. 2020	Yes	Nature neuroscience	INTACT	5	2	7
Losing Dnmt3a dependent methylation in inhibitory neurons impairs neural function by a mechanism impacting Rett syndrome	INTACT	Brain	Striatum (Mus musculus)	Mus musculus	Whole striatum	RNA-seq, DNA methylation	Lavery et al. 2020	Yes	eLife	INTACT
Cell Type-Specific Transcriptomics in the Plant Embryo Using an Adapted INTACT Protoco	INTACT	Plant	Embryo seeds (Arabidopsis thaliana)	Arabidopsis thaliana	Embryo seeds	RNA-seq	Palovaara and Wijers 2020	Yes	Plant embryogenesis	INTACT
An integrated transcriptomic and epigenomic atlas of mouse primary motor cortex cell types	FANS	Brain	Mouse brain (Mus musculus)	Mus musculus	frozen tissue dissectates	scRNA-seq, snRNA-seq, snATAC-Seq, snmC-Seq2	Yao et al. 2020	No	BioRxiv	FANS
Extraction of Distinct Neuronal Cell Types from within a Genetically Continuous Population	FANS	Brain	Coronal brain slices (Mus musculus)	Mus musculus	Coronal brain slices	snRNA-seq	Kim et al. 2020	Yes	Neuron	FANS
Conserved and divergent features of DNA methylation in embryonic stem cell-derived neurons	FANS	Brain	Mouse and Human neurons (Mus musuculus and Homo sapiens)	Mus musculus and Homo sapiens	anti-NeuN purification	DNA methylation, rt-qPCR	Matin et al. 2020	No	BioRxiv	FANS
DNA Methylation Atlas of the Mouse Brain at Single-Cell Resolution	FANS	Brain	Mouse brain (Mus musculus)	Mus musculus	anti-NeuN purification	sn-3mc-seq	Liu et al. 2020	No	BioRxiv	FANS
Epigenomic Diversity of Cortical Projection Neurons in the Mouse Brain	FANS	Brain	Mouse brain (Mus musculus)	Mus musculus	Spereated 2 female and male brain region	snmC-Seq2	Zhang et al. 2020	Yes	BioRxiv	FANS
A Chromatin Accessibility Atlas of the Developing Human Telencephalon	FACS	Brain	Devloping human and mouse brain (Mus musculus and Homo sapiens)	Mus musculus and Homo sapiens	Dissected brain regions and cell culture	ATAC-seq, ChIP-seq	Markenscoff-Papadimitriou et al. 2020	Yes	Cell	FANS
The Dynamic Chromatin Architecture of the Regenerating Liver	FACS	Liver	Hepatocytes (Mus musculus)	Mus musculus	Liver	ATAC-seq, ChIP-seq	Wang et al. 2020	Yes	Cellular and Molecular Gastroenterology and Hepatology	FANS
Mouse c-Synuclein Promoter-Mediated Gene Expression and Editing in Mammalian Retinal Ganglion Cells	FACS	Eye	Retinal ganglia cells (Mus musculus and Homo sapiens)	Mus musculus and Homo sapiens	Isolated retinal ganglia cells	FISH, Immunohistochemsitry	Wang et al. 2020	Yes	The journal of Neuroscience	FACS
Decoding the Transcriptional Response to Ischemic Stroke in Young and Aged Mouse Brain	FACS	Brain	Brain tissue following storke (Mus musculus)	Mus musculus	Sorted a vreity of brain cell populations	RNA-seq, RT-qPCR	Androvic et al. 2020	Yes	Cell Reprot	FACS
Quantitative single-cell interactomes in normal and virus-infected mouse lungs	FACS	Lungs	Lungs (Mus musculus)	Mus musculus	Sorted immune cell from lung	scRNA-seq	Cain, Hernandez and Chen 2020	No	Disease Models and Organisms	FACS
Neuronal non-CG methylation is an essential target for MeCP2 function	FACS	Brain	Brain	Mus musculus	Flow cytometry (NeuN) for analysis and not sorting	RNA-seq, ATAC-seq, ChIP-seq	Tilloston et al. 2020	Yes	BioRxiv	FACS
Enhancer viruses and a transgenic platform for combinatorial cell subclass-specific labeling	FACS	Brain	Crotex (Mus musculus)	Mus musculus	Sorting of coretx neurons	scATAc-seq, scRNA-seq	Graybuck et al. 2020	Yes	BioRxiv	FACS
An Activity-Mediated Transition in Transcription in Early Postnatal Neurons	Both	Brain	Cortex (Mus musculus	Mus musculus	Sst- and Vip-expressing nuclei	nucRNA-seq, ChIP-seq, ATAC-seq, WGBS	Stroud et al. 2020	Yes	Neuron	Both
							Total count (2016-2020)		79
											Only FACS--> FANS
											FACS	FANS
											21	19	40
											Total
											FACS	FANS
											21	31	52

## Sheet: Data analysis (Only FANS)
Table 3. Data represenation. With the data provided from "Analysis table", data was visulaized using respective figures to observe the trend in use of INTACT, FANS or both techniques
																			All subsequent analyses per technique							Subsequent analyses per technique (per year)
	Citation relevance per year																									2016				2017				2018				2019				2020
		Relevant	Reference	Review	Total	In %													Technique	INTACT	FANS/FACS	Both				Technique	INTACT	FANS	Both	Technique	INTACT	FANS	Both	Technique	INTACT	FANS	Both	Technique	INTACT	FANS	Both	Technique	INTACT	FANS	Both	Total
	2016	5	20	17	42	13.5484													qPCR	5	4	1	10			qPCR	1	1	0	RNA-seq	1	1	1	RNA-seq	1	5	2	RNA-seq	9	10	4	RNA-seq	4	2	1	43
	2017	12	36	18	66	21.2903													RNA-seq	11	17	8	36			RNA-seq	0	1	1	ATAC-seq	0	1	1	ATAC-seq	1	2	1	ATAC-seq	5	8	1	ATAC-seq	0	3	1	26
	2018	13	35	19	67	21.6129													ATAC-seq	6	12	4	22			ATAC-seq	0	1	1	qPCR	1	1	0	single cell analyses	0	1	0	single cell analyses	0	3	1	single cell analyses	0	1	0	10
	2019	32	43	15	90	29.0323													ChIP-seq	5	8	5	18			ChIP-seq	0	0	1	ChIP-seq	1	1	1	ChIP-seq	1	2	1	scRNA-seq	0	1	1	scRNA-seq	0	1	0	11
	2020	17	22	6	45	14.5161													DNA-methylation	2	5	0	7			DNA-methylation	0	1	0	WGBS	1	0	0	RRBS	0	1	0	scATAC-seq	0	2	0	scATAC-seq	0	0	0	5
	Total	79	156	75	310														WGBS	1	2	1	4			MethylC-seq	0	0	1	single cell analyses	1	1	0	scATAC-seq	0	1	0	DNA-methylation	2	3	0	DNA-methylation	1	1	0	11
	In %	25.4839	50.3226	24.1935															RRBS	0	1	0	1			Dnase-seq	0	0	1	NGBS	0	1	0	scRNA-seq	0	0	0	ChIP-seq	3	5	2	ChIP-seq	0	2	1	15
																			MethylC-seq	0	1	1	2			WGBS	0	0	0	Gro-seq	0	1	0	qPCR	0	0	1	qPCR	3	2	0	qPCR	1	1	0	9
																			NGBS	0	1	0	1			RRBS	0	0	0	scRNA-seq	1	0	0	DNA-methylation	0	1	0	Dnase-seq	0	1	0	Dnase-seq	0	0	0	3
																			Gro-seq	0	1	0	1			NGBS	0	0	0	DNA-methylation	0	0	0	WGBS	0	0	0	WGBS	0	2	1	WGBS	0	0	1	4
																			Dnase-seq	0	1	1	2			Gro-seq	0	0	0	RRBS	0	0	0	MethylC-seq	0	0	0	RRBS	0	0	0	RRBS	0	0	0	0
																			scATAC-seq	0	3	0	3			scATAC-seq	0	0	0	MethylC-seq	0	0	0	NGBS	0	0	0	MethylC-seq	0	1	0	MethylC-seq	0	0	0	1
																			scRNA-seq	1	1	1	3			scRNA-seq	0	0	0	Dnase-seq	0	0	0	Gro-seq	0	0	0	NGBS	0	0	0	NGBS	0	0	0	0
																			single cell analyses	1	5	1	7			single cell analyses	0	0	0	scATAC-seq	0	0	0	Dnase-seq	0	0	0	Gro-seq	0	0	0	Gro-seq	0	0	0	0
	Technique used per year																			32	62	23	117				1	4	5		6	7	3		3	13	5		22	38	10		6	11	4	138
		FANS/FACS	INTACT	Both	Total	In %
	2016	2	1	1	4	6.89655																					INTACT	FANS	Both
	2017	4	2	2	8	13.7931																					38	73	27	138
	2018	6	3	2	11	18.9655
	2019	12	8	3	23	39.6552
	2020	7	4	1	12	20.6897
	Total	31	18	9	58
	In %	53.4483	31.0345	15.5172
																			Classification of subsequent analyses per technique (per year) (alphabetical order)
																				2016				2017				2018				2019				2020
																			Technique	INTACT	FANS	Both	Technique	INTACT	FANS	Both	Technique	INTACT	FANS	Both	Technique	INTACT	FANS	Both	Technique	INTACT	FANS	Both	Total
																			ATAC-seq	0	1	1	ATAC-seq	0	1	1	ATAC-seq	1	2	1	ATAC-seq	5	5	0	ATAC-seq	0	3	1	22
																			ChIP-seq	0	0	1	ChIP-seq	1	1	1	ChIP-seq	1	2	1	ChIP-seq	3	3	1	ChIP-seq	0	2	1	18
																			DNA-methylation	0	1	0	DNA-methylation	0	0	0	DNA-methylation	0	1	0	DNA-methylation	1	2	0	DNA-methylation	1	1	0	7
																			Dnase-seq	0	0	1	Dnase-seq	0	0	0	Dnase-seq	0	0	0	Dnase-seq	0	1	0	Dnase-seq	0	0	0	2
																			Gro-seq	0	0	0	Gro-seq	0	1	0	Gro-seq	0	0	0	Gro-seq	0	0	0	Gro-seq	0	0	0	1
																			MethylC-seq	0	0	1	MethylC-seq	0	0	0	MethylC-seq	0	0	0	MethylC-seq	0	1	0	MethylC-seq	0	0	0	2
																			NGBS	0	0	0	NGBS	0	1	0	NGBS	0	0	0	NGBS	0	0	0	NGBS	0	0	0	1
																			qPCR	1	1	0	qPCR	1	1	0	qPCR	0	0	1	qPCR	2	1	0	qPCR	1	1	0	10
																			RNA-seq	0	1	1	RNA-seq	1	1	1	RNA-seq	1	5	2	RNA-seq	5	8	3	RNA-seq	4	2	1	36
																			RRBS	0	0	0	RRBS	0	0	0	RRBS	0	1	0	RRBS	0	0	0	RRBS	0	0	0	1
	Tissue used per technqiue																		scATAC-seq	0	0	0	scATAC-seq	0	0	0	scATAC-seq	0	1	0	scATAC-seq	0	2	0	scATAC-seq	0	0	0	3
	Tissue	FANS/FACS	INTACT	Both	Total	In %													scRNA-seq	0	0	0	scRNA-seq	1	0	0	scRNA-seq	0	0	0	scRNA-seq	0	0	1	scRNA-seq	0	1	0	3
	Brain	29	9	4	42	72.4138													single cell analyses	0	0	0	single cell analyses	1	1	0	single cell analyses	0	1	0	single cell analyses	0	2	1	single cell analyses	0	1	0	7
	Plant	0	6	0	6	10.3448													WGBS	0	0	0	WGBS	1	0	0	WGBS	0	0	0	WGBS	0	2	0	WGBS	0	0	1	4
	Heart	0	3	0	3	5.17241														1	4	5		6	7	3		3	13	5		16	27	6		6	11	4	117
	Adipose	0	0	1	1	1.72414
	Multiple	1	0	2	3	5.17241
	Liver	1	0	1	2	3.44828														RNA-seq						ATAC-seq						ChIP-seq						DNA methylation analysis
	Eye	0	0	1	1	1.72414														INTACT	FANS/FACS	Both				INTACT	FANS/FACS	Both				INTACT	FANS/FACS	Both				INTACT	FANS/FACS	Both
	Total	31	18	9	58														2016	0	1	1	2		2016	0	1	1	2		2016	0	0	1	1		2016	0	1	1	2
	In %	53.4483	31.0345	15.5172															2017	1	1	1	3		2017	0	1	1	2		2017	1	1	1	3		2017	1	1	0	2
																			2018	1	5	2	8		2018	1	2	1	4		2018	1	2	1	4		2018	0	2	0	2
																			2019	5	8	3	16		2019	5	5	0	10		2019	3	3	1	7		2019	1	5	0	6
																			2020	4	2	1	7		2020	0	3	1	4		2020	0	2	1	3		2020	1	1	1	3
																				11	17	8	36			6	12	4	22			5	8	5	18			3	10	2	15
	Tissue used per technqiue
	Tissue	Total	In %
	Brain	42	72.4138
	Plant	6	10.3448
	Heart	3	5.17241
	Adipose	1	1.72414
	Multiple	3	5.17241
	Liver	2	3.44828
	Eye	1	1.72414
		58
																			Number of publications per selected sequencing technique
																				INTACT	FANS	Both											Use of sequencing technique per year
																			RNA-seq	11	17	8	36
																			ATAC-seq	6	12	4	22
																			ChIP-seq	5	8	5	18												INTACT	FANS/FACS	Both
	Organism used per technique																		DNA methylation analysis	3	10	2	15										RNA-seq	2016	0	1	1
	Organism	FANS/FACS	INTACT	Both	Total	In %														25	47	19	91											2017	1	1	1
	Mus musculus	18	11	8	37	63.7931																												2018	1	5	2
	Homo sapiens	8	0	0	8	13.7931																												2019	5	8	3
	Mus musculus and Homo sapiens	4	0	0	4	6.89655																												2020	4	2	1
	Drosophila melanogaster	0	1	1	2	3.44828																											ATAC-seq	2016	0	1	1
	Mus musculus and Rattus norvegicus	1	0	0	1	1.72414																												2017	0	1	1
	Arabidopsis thaliana	0	5	0	5	8.62069																												2018	1	2	1
	Oryza sativa	0	1	0	1	1.72414																												2019	5	5	0
	Total	31	18	9	58																													2020	0	3	1
	In %	53.4483	31.0345	15.5172																													ChIP-seq	2016	0	0	1
																																		2017	1	1	1
																																		2018	1	2	1
	Organism	FANS/FACS	INTACT	Both	Total	In %																												2019	3	3	1
	Mus musculus	23	11	8	42	66.6667													Percentage of publications per selected sequencing technique															2020	0	2	1
	Homo sapiens	12	0	0	12	19.0476														Percentages													DNA methylation	2016	0	1	1
	Drosophila melanogaster	0	1	1	2	3.1746														INTACT	FANS	Both												2017	1	1	0
	Rattus norvegicus	1	0	0	1	1.5873													RNA-seq	30.5556	47.2222	22.2222												2018	0	2	0
	Arabidopsis thaliana	0	5	0	5	7.93651													ATAC-seq	27.2727	54.5455	18.1818												2019	1	5	0
	Oryza sativa	0	1	0	1	1.5873													ChIP-seq	27.7778	44.4444	27.7778												2020	1	1	1
	Total	36	18	9	63														DNA methylation analysis	20	66.6667	13.3333
	In %	57.1429	28.5714	14.2857
	Combining all organisms
	Organism	Total counts	%
	Mus musculus	42	66.6667
	Homo sapiens	12	19.0476
	Drosophila melanogaster	2	3.1746
	Rattus norvegicus	1	1.5873
	Arabidopsis thaliana	5	7.93651
	Oryza sativa	1	1.5873
	Total	63
	Organisms appearing in the selected list (60)
	Organism
	Mus musculus	37
	Homo sapiens	8
	Mus musculus and Homo sapiens	4
	Drosophila melanogaster	2
	Mus musculus and Rattus norvegicus	1
	Arabidopsis thaliana	5
	Oryza sativa	1
		58
	Use of Transgenics by year
		2016			2017			2018			2019			2020			Total	In %
	Transgnic use	INTACT	FANS	Both	INTACT	FANS	Both	INTACT	FANS	Both	INTACT	FANS	Both	INTACT	FANS	Both
	Yes	1	0	1	2	2	2	3	1	2	8	9	3	4	4	1	43	74.1379
	No	0	2	0	0	2	0	0	5	0	0	3	0	0	3	0	15	25.8621
	Total	1	2	1	2	4	2	3	6	2	8	12	3	4	7	1	58
	In %	1.72414	3.44828	1.72414	3.44828	6.89655	3.44828	5.17241	10.3448	3.44828	13.7931	20.6897	5.17241	6.89655	12.069	1.72414
	Overall use of technique based on use trangenics, Organisms and tissue
																		Use of Transgenics
																			INTACT	FANS/FACS	Both
																		Yes	18	16	9	43
																		No	0	15	0	15
																						58
																		Organism	INTACT		FANS/FACS		Both
																		Mus musculus	11	Mus musculus	18	Mus musculus	8	42
																		Arabidopsis thaliana	5	Homo sapiens	8	Drosophila melanogaster	1	12
																		Drosophila melanogaster	1	Multiple	5	Homo sapiens	0	2
																		Oryza sativa	1
																			INTACT	FANS/FACS	Both
																		Oryza sativa	1	0	0
																		Mus musculus and Homo sapiens	0	4	0
																		Mus musculus and Rattus norvegicus	0	1	0
																		Others or multiple	1	5	0
																		Tissue	INTACT		FANS/FACS		Both
																		Brain	9	Brain	29	Brain	4	42
																		Plant	6	Multiple	1	Multiple	2	3
																		Heart	3	Liver	1	Adipose	1	1
																		Adipose	0	Plant	0	Liver	1	3
																		Multiple	0	Heart	0	Eye	1	2
																		Liver	0	Adipose	0	Plant	0	1
																		Eye	0	Eye	0	Heart	0	6
