# Supplementary material for: INTACT vs. FANS for Cell-Type-Specific Nuclei Sorting: A Comprehensive Qualitative and Quantitative Comparison
Source: Int J Mol Sci. 2021 May 19;22(10):5335. doi: 10.3390/ijms22105335 (PMC8159132; doi:10.3390/ijms22105335)
Supplement: Supplementary file 1 [file ijms-22-05335-s001.zip › Supplementary Table S2 - Group1_DEGs .xlsx]

## Sheet: FANSvsINTACT_DEGs_Group1
id	baseMeanA	baseMeanB	log2FoldChange	pval	padj
9530091C08Rik	1239.63	270.66	-2.19536	2.54805e-59	5.10476e-55
5031426D15Rik	2904.24	748.391	-1.9563	1.70149e-54	1.70439e-50
Lrtm1	657.279	190.428	-1.78726	2.68983e-35	1.79627e-31
Mir128-2	226.784	46.3842	-2.28961	6.74787e-34	3.37967e-30
Nrg3os	410.211	113.377	-1.85524	6.0596e-32	2.42796e-28
4930480K15Rik	584.377	197.585	-1.56443	1.45862e-27	4.87033e-24
Muc6	223.669	57.212	-1.96698	1.42344e-26	4.07388e-23
4921534H16Rik	333.237	106.148	-1.65047	1.1076e-24	2.7737e-21
Cdr1	3965.58	1717.21	-1.20746	1.24373e-23	2.76854e-20
6330415B21Rik	356.726	118.908	-1.58497	1.41107e-23	2.82693e-20
Gm8179	157.848	37.4886	-2.07401	2.23974e-23	4.07917e-20
Gm5415	249.737	76.9983	-1.69751	2.33563e-22	3.89934e-19
4931430N09Rik	177.612	48.3021	-1.87857	1.34786e-21	2.07716e-18
Snord17	6737.02	3023.97	-1.15567	8.72193e-21	1.24811e-17
F630111L10Rik	449.256	171.129	-1.39245	3.43441e-20	4.587e-17
C230004F18Rik	1167.85	512.03	-1.18956	6.37981e-20	7.98832e-17
4930545L23Rik	198.238	61.398	-1.69097	2.03584e-19	2.39917e-16
Snora70	561.025	224.947	-1.31848	2.48666e-19	2.76765e-16
Acot10	150.132	41.7923	-1.84493	7.28352e-19	7.67989e-16
Kcnq1ot1	19712.6	9734.83	-1.01789	4.71471e-18	4.72273e-15
Gm20172	173.944	55.8667	-1.63856	5.08086e-17	4.84714e-14
Lincpint	1035.66	494.941	-1.06522	2.56799e-16	2.33851e-13
1700123L14Rik	117.693	33.3122	-1.8209	5.30739e-16	4.62296e-13
Ube3a	4855.65	2481.54	-0.968425	8.03555e-16	6.70768e-13
Erc2	3281.85	1666.77	-0.977454	8.59376e-16	6.88669e-13
Igfn1	782.726	370.683	-1.07832	1.00735e-15	7.76206e-13
Gm5136	152.952	50.6961	-1.59313	2.10489e-15	1.56183e-12
5530401A14Rik	140.218	46.7942	-1.58327	4.70648e-15	3.36749e-12
Tbrg3	1324.61	674.722	-0.973205	1.95367e-14	1.34965e-11
Pcsk2os2	487.772	224.977	-1.11643	2.12634e-14	1.41997e-11
C630031E19Rik	349.736	153.355	-1.18939	3.53311e-14	2.2833e-11
C230091D08Rik	2310.53	1230.89	-0.908517	1.81253e-13	1.13476e-10
2310075C17Rik	393.21	184.196	-1.09406	2.72147e-13	1.65218e-10
Iqcj	154.076	55.9672	-1.46099	3.21472e-13	1.89423e-10
Runx2	528.151	258.153	-1.03273	4.42389e-13	2.53223e-10
4930594C11Rik	214.167	88.2746	-1.27866	6.83287e-13	3.80249e-10
Slc1a3	47.1562	134.94	1.5168	1.31376e-12	7.11349e-10
1700080N15Rik	77.8958	21.5131	-1.85633	1.57957e-12	8.32765e-10
Meg3	150658	85374	-0.819408	2.07033e-12	1.06351e-09
Prnp	700.507	1292.83	0.884064	2.92477e-12	1.46487e-09
3110039I08Rik	1893.98	1040.54	-0.864091	3.43666e-12	1.67927e-09
A930011G23Rik	149.319	57.5953	-1.37437	4.13065e-12	1.9245e-09
Mal	180.145	376.099	1.06196	4.05865e-12	1.9245e-09
1700071K01Rik	50.7842	10.0511	-2.33702	4.7188e-12	2.03058e-09
4930539N22Rik	127.087	46.3143	-1.45629	4.72619e-12	2.03058e-09
Angptl2	203.167	86.1886	-1.2371	4.72775e-12	2.03058e-09
Gm16523	489.756	244.681	-1.00116	4.76376e-12	2.03058e-09
Atp1a2	143.71	306.526	1.09285	5.6085e-12	2.34085e-09
Tspan7	739.328	1351.18	0.869934	6.80884e-12	2.72817e-09
Sparcl1	1041.15	1864.24	0.840415	9.42777e-12	3.70345e-09
Reep5	433.846	804.456	0.890831	2.01041e-11	7.74551e-09
Apoe	78.8872	187.841	1.25165	2.28069e-11	8.62102e-09
8430431K14Rik	184.144	78.0642	-1.2381	2.6291e-11	9.75398e-09
1700085C21Rik	35.8303	5.58127	-2.68251	2.84458e-11	1.03615e-08
Arpp21	11276.1	6540.01	-0.785904	2.93773e-11	1.05097e-08
Ptgds	187.194	377.757	1.01292	4.73244e-11	1.66333e-08
Serinc1	2371.42	4082.38	0.78366	5.14036e-11	1.77555e-08
Kcnip4	615.451	327.01	-0.912309	5.26038e-11	1.78621e-08
Thy1	731.941	1310.41	0.840217	5.38774e-11	1.79897e-08
A330076H08Rik	1013.72	561.883	-0.851311	5.54897e-11	1.82243e-08
Gja1	14.6129	61.7135	2.07834	6.05281e-11	1.95584e-08
Gpr171	224.538	102.338	-1.13362	6.22767e-11	1.9804e-08
4930405O22Rik	123.076	46.9985	-1.38886	7.11356e-11	2.22677e-08
Bcas3os1	117.31	45.2089	-1.37565	7.41706e-11	2.28605e-08
Tmem30a	1684.94	2896.13	0.78143	7.71229e-11	2.34103e-08
Ctsb	564.892	1010.61	0.839186	9.24959e-11	2.76576e-08
Fam205a1	69.7104	20.6337	-1.75637	1.16933e-10	3.44505e-08
4930509J09Rik	60.7858	16.8118	-1.85426	1.29867e-10	3.77066e-08
4933413L06Rik	129.676	51.1701	-1.34154	1.50685e-10	4.31259e-08
LOC100862268	277.671	135.778	-1.03213	1.53466e-10	4.33032e-08
Tmed7	415.528	753.185	0.858058	1.67453e-10	4.65939e-08
Aplp1	1491.81	2551.99	0.774559	1.75203e-10	4.80824e-08
Sorbs2os	1341.76	764.955	-0.810679	1.93508e-10	5.23883e-08
E030024N20Rik	546.409	293.713	-0.895574	2.62503e-10	7.01198e-08
Gm15412	42.0713	8.58621	-2.29274	2.81441e-10	7.41894e-08
Fndc9	424.679	222.266	-0.934084	3.16233e-10	8.12233e-08
Ipw	6553.94	3927.87	-0.738615	3.12521e-10	8.12233e-08
Rgs9	1055.33	593.077	-0.831409	3.24617e-10	8.23213e-08
5330434G04Rik	775.972	434.001	-0.838307	3.69733e-10	9.25903e-08
Pdia3	542.713	954.503	0.814562	5.42317e-10	1.34133e-07
Psap	1621.92	2722.55	0.747254	6.34048e-10	1.54909e-07
Cpe	1475.62	2471.35	0.743974	6.49807e-10	1.56846e-07
Hivep3	1106.2	633.987	-0.803087	6.84376e-10	1.63224e-07
Alas2	126.346	52.1698	-1.27609	8.81689e-10	2.07809e-07
Tmem132a	591.53	1026.33	0.794978	9.24304e-10	2.1532e-07
B4gat1	244.509	455.493	0.897542	1.04059e-09	2.39624e-07
P2ry14	156.545	70.2362	-1.15629	1.08695e-09	2.47455e-07
Gm16386	466.268	252.071	-0.88733	1.13731e-09	2.5601e-07
4932413F04Rik	144.445	63.1823	-1.19293	1.19468e-09	2.65935e-07
Vmn2r85	196.093	92.429	-1.08512	1.3928e-09	3.0663e-07
Atp1b1	3175.52	5220.62	0.71723	1.54451e-09	3.36334e-07
Adam4	118.159	48.7808	-1.27635	1.93739e-09	4.17352e-07
Itm2b	1073.27	1786.65	0.735249	1.99028e-09	4.24183e-07
A230057D06Rik	550.052	308.253	-0.83545	2.06763e-09	4.3603e-07
Gm4787	111.545	44.795	-1.31622	2.10373e-09	4.39022e-07
Gm6588	89.5411	33.8686	-1.4026	2.17836e-09	4.4991e-07
9530059O14Rik	918.248	536.209	-0.77609	2.38833e-09	4.88244e-07
Itm2c	550.472	935.55	0.765146	2.48871e-09	5.03625e-07
Serpini1	731.102	1235.94	0.757467	2.56403e-09	5.13677e-07
Elavl3	921.768	539.047	-0.773992	2.79795e-09	5.54991e-07
Hspa5	701.539	1185.64	0.757075	2.85488e-09	5.60733e-07
Clstn1	3080.23	5003.76	0.699976	3.0944e-09	6.01876e-07
Gpr37	154.456	298.791	0.951939	3.32849e-09	6.41182e-07
Ksr2	633.404	362.722	-0.804262	3.67375e-09	7.00952e-07
S1pr1	7.53333	38.9602	2.37064	3.77491e-09	7.13459e-07
Gja6	189.914	91.1117	-1.05964	4.43023e-09	8.29487e-07
4933431G14Rik	216.154	107.39	-1.0092	4.77564e-09	8.85881e-07
Timp2	256.829	460.289	0.841732	5.37897e-09	9.88645e-07
Gm5441	78.3671	28.1632	-1.47644	5.60361e-09	1.02057e-06
Calr	630.268	1057.76	0.746968	5.69766e-09	1.02835e-06
Tspan3	364.528	632.356	0.794709	5.91926e-09	1.05881e-06
Srrm4os	540.926	309.956	-0.803365	7.20436e-09	1.27728e-06
Fam205c	376.198	208.749	-0.849726	7.83687e-09	1.37723e-06
Cldn11	186.154	343.359	0.883224	8.45754e-09	1.47338e-06
Plp1	3983.56	6372.95	0.6779	8.68491e-09	1.49994e-06
Gm32014	148.579	66.6172	-1.15727	8.90799e-09	1.52532e-06
Gm15413	121.775	53.477	-1.18723	1.08853e-08	1.8481e-06
Cst3	112.312	226.75	1.01359	1.13522e-08	1.91117e-06
Xirp2	895.893	535.289	-0.743008	1.20067e-08	2.00452e-06
Eef2	904.892	1484.02	0.713697	1.23569e-08	2.04594e-06
Uchl4	93.3993	37.1277	-1.33092	1.35575e-08	2.22632e-06
Gabra1	2800.33	4463.13	0.672457	1.43501e-08	2.31847e-06
Gm20199	524.454	299.925	-0.806213	1.42348e-08	2.31847e-06
Idh3g	828.247	1372.72	0.728907	1.49309e-08	2.393e-06
Erc1	925.345	553.154	-0.742309	1.57e-08	2.4963e-06
Lrrtm4	1117.4	674.174	-0.728958	1.66037e-08	2.61921e-06
App	3882.88	6126.72	0.657989	1.77754e-08	2.77184e-06
Clu	227.814	405.2	0.830778	1.7848e-08	2.77184e-06
Gpm6a	2769.62	4392.8	0.665453	1.8852e-08	2.90524e-06
Impad1	441.124	737.252	0.740975	2.08086e-08	3.15818e-06
Rims2	3202.95	2002.37	-0.677698	2.07803e-08	3.15818e-06
Atp6ap2	521.118	869.141	0.73798	2.09676e-08	3.15838e-06
4930405A21Rik	68.9887	24.7872	-1.47676	2.2968e-08	3.43388e-06
Rad51ap2	346.71	191.64	-0.855334	2.32358e-08	3.44819e-06
2010106C02Rik	30.4898	5.73286	-2.411	2.34344e-08	3.45209e-06
Mir29b-1	63.4871	22.0727	-1.5242	2.48195e-08	3.62944e-06
A430090L17Rik	67.9968	24.1354	-1.49432	2.78567e-08	4.04407e-06
Ckb	1190.36	1915.94	0.686653	2.90518e-08	4.18723e-06
4930444F02Rik	89.6503	36.373	-1.30144	2.93102e-08	4.19429e-06
A930013F10Rik	738.494	442.698	-0.738264	3.44239e-08	4.85667e-06
Gm11186	65.8494	23.6233	-1.47896	3.42481e-08	4.85667e-06
Nceh1	467.128	777.45	0.734933	3.49843e-08	4.90123e-06
4930419G24Rik	337.711	188.637	-0.840177	4.52529e-08	6.29581e-06
4921511H03Rik	45.1365	13.2216	-1.7714	4.57665e-08	6.32336e-06
4930567K12Rik	77.9464	29.1599	-1.4185	4.6184e-08	6.33733e-06
Nxpe2	63.9402	22.2252	-1.52452	4.76228e-08	6.4903e-06
Vmn2r87	245.174	131.172	-0.902344	4.9559e-08	6.70855e-06
Penk	181.073	323.261	0.836129	5.26256e-08	7.07585e-06
Polq	473.185	276.142	-0.776994	5.68902e-08	7.59825e-06
Magi2	2527.51	1593.64	-0.665388	6.33129e-08	8.40006e-06
Samd5	161.773	78.8092	-1.03754	6.37535e-08	8.40288e-06
Dus3l	637.796	1039.64	0.704916	6.64643e-08	8.6464e-06
Rbm6	1076.23	666.173	-0.692023	6.63041e-08	8.6464e-06
1700123O21Rik	38.064	10.2136	-1.89793	6.71929e-08	8.68479e-06
Slc22a17	1435	2278.95	0.667311	7.01142e-08	9.00428e-06
Pgrmc1	316.668	532.51	0.74984	7.3636e-08	9.39633e-06
C130050O18Rik	54.9965	18.1765	-1.59727	7.73102e-08	9.80274e-06
Synpr	110.461	212.175	0.941723	8.43804e-08	1.06319e-05
Dkk3	689.78	1097.89	0.670526	9.05174e-08	1.13339e-05
Dalrd3	591.487	969.526	0.712933	9.11584e-08	1.13433e-05
Dlg2	3641.16	2320.7	-0.649842	1.00162e-07	1.23107e-05
Ppap2b	31.7645	79.6295	1.32589	1.00081e-07	1.23107e-05
Kpnb1	2026.73	3152.72	0.637448	1.04977e-07	1.28238e-05
Gm6402	42.7247	12.0635	-1.82442	1.07658e-07	1.30716e-05
A830082K12Rik	403.385	234.499	-0.782573	1.12915e-07	1.36273e-05
Nova2	734.082	450.671	-0.703867	1.16877e-07	1.4021e-05
Edil3	990.384	1556.76	0.652491	1.19538e-07	1.42549e-05
D830031N03Rik	368.255	213.127	-0.788988	1.34867e-07	1.59384e-05
Golga4	3031.31	1940.62	-0.64342	1.35246e-07	1.59384e-05
Map6	1478.31	937.498	-0.657056	1.42681e-07	1.67162e-05
Fam50a	256.369	437.112	0.769781	1.44849e-07	1.68716e-05
Canx	1367.68	2131.79	0.640336	1.48711e-07	1.71319e-05
Mab21l1	291.461	165.572	-0.815841	1.48794e-07	1.71319e-05
Rce1	103.97	200.105	0.944593	1.57487e-07	1.80291e-05
Hdac3	791.274	1257.04	0.667783	1.67441e-07	1.88715e-05
Syt11	1603.95	2489.43	0.634188	1.67671e-07	1.88715e-05
Tnks1bp1	605.481	369.802	-0.711327	1.67227e-07	1.88715e-05
Tbl3	153.795	277.465	0.851297	1.92068e-07	2.14966e-05
Atp6ap1	550.535	882.65	0.681006	2.09075e-07	2.32701e-05
Gm15881	52.863	17.4254	-1.60107	2.18215e-07	2.41531e-05
4930563F08Rik	38.3956	10.5495	-1.86377	2.26835e-07	2.48329e-05
Ylpm1	4039.32	2628.38	-0.619937	2.26019e-07	2.48329e-05
Lrp11	508.062	813.239	0.678675	2.48347e-07	2.69489e-05
Snhg14	2214.51	1429.9	-0.631071	2.48854e-07	2.69489e-05
Olfm3	320.018	524.683	0.713296	2.54439e-07	2.74056e-05
Krt20	103.084	47.8929	-1.10593	2.69631e-07	2.88865e-05
Itfg1	886.207	1385.85	0.64506	2.7952e-07	2.97867e-05
Arhgef25	1115.38	1743.86	0.644743	2.82109e-07	2.99036e-05
Gpatch8	1995.68	1285.59	-0.634446	2.97451e-07	3.13638e-05
Pcyox1	297.154	492.164	0.72793	3.01864e-07	3.14976e-05
Uri1	618.374	376.133	-0.717236	3.00771e-07	3.14976e-05
Saraf	384.601	625.889	0.702546	3.16695e-07	3.28739e-05
Cck	460.191	741.299	0.687821	3.27925e-07	3.36905e-05
2020-09-08	1690.63	1090.35	-0.632774	3.27131e-07	3.36905e-05
Auts2	764.956	479.732	-0.673147	3.39536e-07	3.47055e-05
Fth1	420.734	682.254	0.697398	3.41784e-07	3.47578e-05
Serpind1	161.332	83.1985	-0.955405	3.46089e-07	3.50179e-05
Skiv2l	471.132	760.921	0.691617	3.60596e-07	3.63024e-05
Sst	22.2293	61.7838	1.47476	3.68203e-07	3.68829e-05
Gpr87	73.681	30.5494	-1.27015	4.05453e-07	4.04122e-05
Clcn2	810.332	1269.85	0.648074	4.12228e-07	4.06826e-05
Mlip	382.374	224.475	-0.768431	4.12084e-07	4.06826e-05
Smpd1	209.289	355.702	0.765172	5.2234e-07	5.12968e-05
A330015K06Rik	187.996	101.229	-0.893089	5.56339e-07	5.43692e-05
Malat1	581487	390660	-0.573834	6.08034e-07	5.91328e-05
AF357425	181.948	98.6515	-0.883115	6.17377e-07	5.94641e-05
Rpl12	124.806	226.902	0.862382	6.15044e-07	5.94641e-05
Eml5	5730.07	3796.34	-0.593944	6.28818e-07	5.99892e-05
Muc15	433.112	262.205	-0.724043	6.27596e-07	5.99892e-05
Scd2	1921.56	2901.37	0.594454	6.32442e-07	6.0049e-05
Dennd6b	1310.85	2013.16	0.618959	6.49877e-07	6.14134e-05
Elovl4	240.997	405.046	0.749067	6.64831e-07	6.25316e-05
4930532I03Rik	133.475	67.4704	-0.984239	6.95226e-07	6.47821e-05
Abhd16a	353.032	573.118	0.699035	6.92313e-07	6.47821e-05
Dlgap2	1497.37	971.426	-0.624252	7.48688e-07	6.91208e-05
Fgf14	642.705	405.594	-0.664119	7.45517e-07	6.91208e-05
Pcsk1n	108.462	199.726	0.880827	7.55739e-07	6.94517e-05
Clptm1	374.239	603.982	0.690547	7.7081e-07	7.03664e-05
Scg2	374.661	600.508	0.680597	7.72716e-07	7.03664e-05
Gm10538	130.964	66.9616	-0.967767	7.91189e-07	7.17226e-05
Gm1653	176.494	94.9374	-0.894573	8.21464e-07	7.41315e-05
Tecr	774.733	1199.75	0.630963	8.60701e-07	7.73242e-05
Klhl3	256.964	148.526	-0.790847	8.91027e-07	7.96912e-05
Abca7	348.01	562.926	0.693814	9.16161e-07	8.12141e-05
Gm16907	338.601	202.515	-0.741559	9.14851e-07	8.12141e-05
Aup1	462.43	733.227	0.665024	9.44274e-07	8.33374e-05
Endod1	196.539	331.02	0.752103	9.65741e-07	8.48581e-05
Camkv	2112.4	3186.68	0.593169	9.77113e-07	8.54824e-05
Rtn1	1477.4	2233.56	0.596284	9.93551e-07	8.65426e-05
1300002E11Rik	307.864	183.532	-0.746266	1.0204e-06	8.84962e-05
Strbp	10478.6	7040.75	-0.573643	1.13684e-06	9.817e-05
4930449E18Rik	51.3351	18.0093	-1.5112	1.14845e-06	9.87472e-05
Jakmip1	690.456	438.298	-0.655638	1.18173e-06	0.000101174
Scap	558.598	872.448	0.643259	1.33346e-06	0.000113198
Vmn2r86	114.442	55.5362	-1.04312	1.32865e-06	0.000113198
Ctsd	266.394	432.967	0.700693	1.36892e-06	0.000115717
AA543401	44.941	15.0221	-1.58095	1.40071e-06	0.000117414
Cpsf1	750.25	1153.98	0.621177	1.39578e-06	0.000117414
Gcdh	265.628	432.607	0.70365	1.51624e-06	0.000126159
Syp	817.474	1241.81	0.603203	1.51764e-06	0.000126159
Wnk2	1626.93	1078.43	-0.593225	1.54589e-06	0.000127977
Ppp2r2cos	330.875	199.418	-0.730488	1.61535e-06	0.000133176
Glrb	1074.99	1616.3	0.58837	1.65894e-06	0.00013621
Fcho1	1542.07	2320.3	0.589443	1.68125e-06	0.000137412
Rhot2	538.055	833.944	0.632197	1.6873e-06	0.000137412
Fyco1	1265.34	830.695	-0.607137	1.77506e-06	0.000143974
Cpne7	336.936	543.404	0.68955	1.89447e-06	0.00015304
A330023F24Rik	3537.65	2381.5	-0.570922	1.96853e-06	0.000158384
Rbm4b	298.05	177.258	-0.749705	1.98517e-06	0.00015845
Srek1	2565.45	1722.13	-0.575014	1.98126e-06	0.00015845
Aqp4	11.2682	38.9462	1.78922	2.01935e-06	0.000160538
Mapk1ip1	652.781	420.581	-0.634215	2.05872e-06	0.00016238
Pnn	3073.99	2076.29	-0.566105	2.05754e-06	0.00016238
2210408F21Rik	174.48	95.9404	-0.862851	2.14132e-06	0.000167931
Gm9839	42.8309	14.799	-1.53316	2.14587e-06	0.000167931
Gm11149	45.5042	15.6181	-1.54278	2.19171e-06	0.000170851
P2ry13	70.791	29.7817	-1.24914	2.20288e-06	0.000171056
Xkr6	381.966	235.665	-0.696705	2.31577e-06	0.000179128
Myo16	639.196	409.211	-0.643414	2.32947e-06	0.000179495
2020-09-15	160.059	269.204	0.7501	2.34949e-06	0.000180337
Zfhx2	991.01	650.153	-0.60812	2.35841e-06	0.000180337
Timp3	202.691	115.786	-0.807819	2.37887e-06	0.00018121
Macrod2	539.128	342.306	-0.655339	2.40642e-06	0.000182614
Eef1a1	514.301	793.372	0.625383	2.42717e-06	0.000183494
Speer4b	89.8471	42.632	-1.07554	2.4687e-06	0.000185932
Gm5803	22.6955	5.05316	-2.16715	2.51774e-06	0.000188915
Rabggta	337.244	534.055	0.663196	2.54854e-06	0.000190347
Zbtb16	559.985	355.995	-0.653531	2.55583e-06	0.000190347
Fasn	627.003	958.907	0.612918	2.76963e-06	0.000205506
Cd81	291.197	468.466	0.685947	2.95527e-06	0.000218472
Spock3	400.158	621.291	0.634699	2.97027e-06	0.000218774
Gm4432	77.96	34.6779	-1.16872	3.00202e-06	0.000220046
Zfp407	819.747	531.715	-0.624525	3.00951e-06	0.000220046
Mir690	26.3922	6.35585	-2.05396	3.14575e-06	0.000229171
Nptx1	1719.28	2552.32	0.570002	3.27356e-06	0.000237372
Rtl1	464.685	296.2	-0.649684	3.28202e-06	0.000237372
Shank2	1392.65	930.96	-0.581045	3.2947e-06	0.000237432
Anks1b	2970.42	2011.48	-0.562412	3.37045e-06	0.000240298
Extl2	284.895	449.792	0.658826	3.36433e-06	0.000240298
Maf1	188.21	309.665	0.718364	3.35264e-06	0.000240298
Srrm3	673.401	435.46	-0.628925	3.47935e-06	0.000247182
4933427D14Rik	1318.28	876.516	-0.588808	3.54702e-06	0.000251099
Gm13315	52.736	20.7205	-1.34773	3.56557e-06	0.000251523
2020-09-11	2916.32	1983.18	-0.556331	3.58249e-06	0.00025183
Gpr183	80.4881	38.1258	-1.07801	3.64835e-06	0.000255151
Sema5a	376.286	587.193	0.642006	3.6552e-06	0.000255151
Ralyl	865.148	570.892	-0.59973	3.71176e-06	0.000258199
Maged2	60.3066	118.591	0.975608	3.89304e-06	0.000269873
Nron	107.17	54.7777	-0.968239	3.96274e-06	0.000273757
Aldoa	698.141	1055.28	0.596031	4.23261e-06	0.000291396
Angpt2	137.277	74.9961	-0.872202	4.36151e-06	0.000299242
Abca2	2188.81	3226.59	0.559861	4.40062e-06	0.000300894
Cdk5	527.103	804.333	0.609707	4.43831e-06	0.000302053
Apex2	182.498	103.925	-0.812346	4.56833e-06	0.000308155
Sox5	581.009	375.381	-0.630204	4.56051e-06	0.000308155
Fam171b	1102.55	1632.27	0.566029	4.59313e-06	0.000308788
Rims1	2551.15	1724.25	-0.565179	4.66574e-06	0.00031262
Tcte2	73.2642	33.5998	-1.12466	4.73862e-06	0.000316445
Phf14	1974.16	1334.62	-0.564815	4.86046e-06	0.000323503
Matk	2159.48	3181.09	0.558836	4.90264e-06	0.000325013
Qars	308.676	485.262	0.652669	4.91559e-06	0.000325013
Zfp609	809.63	535.581	-0.596157	4.9351e-06	0.00032523
C030023E24Rik	1026.42	680.758	-0.592402	4.97842e-06	0.000327009
Nprl2	284.735	450.107	0.660647	5.09933e-06	0.000333856
Ctsa	314.612	492.368	0.646163	5.19472e-06	0.000338576
Map4k2	852.155	1275.06	0.581372	5.20522e-06	0.000338576
Cep112	204.001	116.543	-0.807712	5.39159e-06	0.000349563
Hyou1	400.811	614.826	0.617258	5.47643e-06	0.000353919
Mbd5	1372.66	925.174	-0.569177	5.56494e-06	0.000358482
Mag	400.947	616.316	0.620257	5.61865e-06	0.00035963
Mfge8	4.94884	24.2479	2.2927	5.60324e-06	0.00035963
Ptov1	277.213	442.193	0.673679	5.6578e-06	0.000360982
Snord15b	19372.2	13579.7	-0.512533	5.78551e-06	0.000367959
C2cd5	1982.01	1346.99	-0.557228	5.81577e-06	0.000368713
Lamp5	483.485	738.705	0.611528	6.00224e-06	0.000379334
Nrxn3	4361.02	2995.25	-0.54199	6.12548e-06	0.000385905
Cdipt	194.157	315.249	0.699267	6.21032e-06	0.000390024
Syt7	3321.92	2283.69	-0.540652	6.28822e-06	0.000393645
Wdr90	398.03	615.277	0.628359	6.30728e-06	0.000393645
Celf2	11883.7	8232.98	-0.529504	6.39185e-06	0.000397684
Snora64	282.517	169.777	-0.734693	6.45829e-06	0.000400574
Snx32	730.88	1097.94	0.587098	6.52667e-06	0.000403566
Gm12338	124.491	66.5911	-0.902643	6.61258e-06	0.00040762
D730045A05Rik	66.7807	30.2103	-1.14439	6.84061e-06	0.000420383
Map1lc3a	52.3218	104.876	1.0032	6.99132e-06	0.00042833
Manea	325.945	500.94	0.620012	7.13506e-06	0.000435804
Atp1a1	3262.06	4722.59	0.533794	7.18295e-06	0.000437396
Gpr85	277.631	434.578	0.646447	7.25767e-06	0.000440606
Tmem35	58.8815	113.27	0.943884	7.55998e-06	0.000457573
Galt	593.978	895.764	0.59271	7.70391e-06	0.00046488
Gm20324	64.601	28.523	-1.17943	8.29736e-06	0.000499187
Eme2	167.17	274.01	0.712917	8.45043e-06	0.000506874
Kcnj13	92.0425	45.665	-1.01121	8.52292e-06	0.000509696
Fndc4	329.826	514.139	0.640452	8.60551e-06	0.000510067
Gm15941	71.996	33.5495	-1.10162	8.60152e-06	0.000510067
Retnlb	9.8002	0.648838	-3.91688	8.55662e-06	0.000510067
Rhbdl1	436.198	669.666	0.618456	8.66276e-06	0.000511946
Fnbp1l	4020.9	2787.58	-0.528505	8.75689e-06	0.000515987
Lamp1	369.799	562.669	0.605544	8.84559e-06	0.000519685
Tspan2	339.279	521.377	0.619856	9.08741e-06	0.000532331
Plxnb3	214.144	343.74	0.682738	9.12479e-06	0.000532962
Lztr1	877.738	1293.62	0.559553	9.38717e-06	0.000546693
Mkln1os	92.323	46.688	-0.983639	9.60787e-06	0.000557925
Tmx2	291.995	454.935	0.639717	1.0136e-05	0.000586891
Lrrn1	309.36	475.765	0.620961	1.01782e-05	0.000587637
Hspa13	320.029	496.003	0.632146	1.03075e-05	0.000593391
Bcan	103.853	179.955	0.793095	1.03697e-05	0.000595262
Elk3	314.166	197.84	-0.667195	1.04998e-05	0.000600399
Rgs6	394.574	252.753	-0.642565	1.05191e-05	0.000600399
Ppp1r12b	795.337	530.414	-0.584448	1.07045e-05	0.000609246
Shank1	2263.37	1567.98	-0.529565	1.09116e-05	0.000619271
Ddx23	380.483	578.689	0.604958	1.11016e-05	0.000626508
Rundc3a	1421.07	2066.86	0.540462	1.10721e-05	0.000626508
Mir493	23.1176	5.69415	-2.02144	1.12504e-05	0.000633119
Mir6236	166.233	282.432	0.764698	1.13648e-05	0.000637767
Sobp	904.998	607.428	-0.5752	1.14577e-05	0.000639788
Trf	533.606	797.809	0.580268	1.14647e-05	0.000639788
Ly6h	326.219	505.312	0.631334	1.18888e-05	0.000661612
Mir665	41.0884	14.9059	-1.46285	1.19259e-05	0.00066184
Ccdc136	650.715	433.647	-0.585503	1.20833e-05	0.000666877
Phf1	220.741	350.522	0.667152	1.20794e-05	0.000666877
Gm14326	331.921	208.32	-0.672039	1.22491e-05	0.000674173
Teddm1b	54.2337	23.3005	-1.21883	1.24783e-05	0.000684902
8030451O07Rik	33.968	11.0558	-1.61937	1.26543e-05	0.000692666
Fn3k	467.111	304.429	-0.61766	1.27778e-05	0.000695628
Golgb1	3198.3	2217.25	-0.528532	1.27766e-05	0.000695628
Zfp385b	305.423	192.066	-0.669208	1.29297e-05	0.000701986
Actr1b	814.33	1198.43	0.557463	1.29736e-05	0.000702469
Gpr88	240.884	375.163	0.639182	1.34342e-05	0.000725449
D2Wsu81e	130.945	219.578	0.745778	1.34794e-05	0.000725933
Slc35f1	386.288	584.784	0.598228	1.36308e-05	0.000732116
Fam228a	102.7	52.425	-0.970108	1.37156e-05	0.000734703
Nav2	3662.93	2555.47	-0.51941	1.39265e-05	0.000744011
Gm15880	52.8787	21.924	-1.27017	1.39836e-05	0.000745074
Srgap3	2445.33	1699.13	-0.525228	1.41342e-05	0.0007511
Gps1	251.606	392.712	0.642308	1.43592e-05	0.000761039
Arrb2	199.552	321.857	0.689659	1.45352e-05	0.000768333
Epdr1	275.551	422.8	0.617656	1.4794e-05	0.000779957
Srd5a1	82.0961	40.6113	-1.01543	1.49396e-05	0.000785562
Psmc4	396.346	599.023	0.595851	1.51251e-05	0.000793236
Gabrb2	2330.09	3322.05	0.511689	1.52306e-05	0.000796685
Them6	125.644	209.48	0.73747	1.55691e-05	0.000812269
Kcnj6	987.713	674.805	-0.549622	1.57211e-05	0.00081807
Dvl1	811.242	1189.66	0.552344	1.59015e-05	0.000818252
Lrrn2	220.219	347.881	0.659657	1.58096e-05	0.000818252
Rhob	322.412	495.293	0.619374	1.58349e-05	0.000818252
Rpn1	311.678	480.338	0.623997	1.58904e-05	0.000818252
Ubxn6	191.569	305.423	0.672944	1.59288e-05	0.000818252
Phf24	2147.67	1484.28	-0.53301	1.63758e-05	0.000839061
Cadm4	189.603	299.642	0.660259	1.64554e-05	0.000840988
Baiap2l1	91.4277	46.5088	-0.975126	1.66599e-05	0.000847246
Mus81	179.704	287.474	0.677812	1.66624e-05	0.000847246
Morc2b	265.462	164.077	-0.694132	1.69616e-05	0.000860275
Wdr60	856.143	581.324	-0.558508	1.74043e-05	0.000880501
Tex9	368.408	237.463	-0.633603	1.76079e-05	0.000888556
Creg2	598.539	882.009	0.559348	1.79196e-05	0.000902013
Lgmn	217.279	342.209	0.655329	1.82905e-05	0.000918376
Coro1b	358.912	543.235	0.597945	1.83661e-05	0.000919864
Hhip	61.9042	114.906	0.892343	1.85276e-05	0.000923337
Rbfox1	1887.05	1310.86	-0.525623	1.84966e-05	0.000923337
Dnm3os	582.672	387.068	-0.590098	1.86031e-05	0.000924803
Arhgdig	61.6425	114.652	0.895263	1.87407e-05	0.000929333
Tril	1.33583	13.8342	3.37243	1.89454e-05	0.000937166
Slc30a4	657.234	963.158	0.551365	1.93229e-05	0.000953485
Hsp90ab1	1072.11	1546.01	0.528094	1.98066e-05	0.000974951
Enah	1599.38	1100.76	-0.539011	2.00392e-05	0.000983982
Tbc1d17	213.633	337.255	0.658706	2.01347e-05	0.000986254
2700054A10Rik	60.0555	27.1729	-1.14413	2.04143e-05	0.000997513
1700006F04Rik	25.8679	7.41062	-1.8035	2.07302e-05	0.00100981
Ctsf	266.815	412.465	0.628429	2.07668e-05	0.00100981
Mgat4b	178.608	285.655	0.677479	2.10196e-05	0.00101963
Sstr1	119.762	204.167	0.769584	2.11394e-05	0.00102296
Tmx4	1304.9	1865.8	0.515857	2.12039e-05	0.00102361
Kifc2	2000.06	2868.3	0.520151	2.147e-05	0.00103397
Hs6st3	231.732	143.353	-0.692879	2.17553e-05	0.00104442
Usp19	1058.58	1529.26	0.530705	2.17913e-05	0.00104442
Atp1a3	2946.34	4172.14	0.501864	2.25231e-05	0.00107691
Sgsm3	517.082	766.424	0.56775	2.26736e-05	0.00108153
P4hb	180.356	288.704	0.678742	2.27896e-05	0.00108448
4930471G03Rik	23.9436	6.0909	-1.97491	2.29698e-05	0.00109046
Ulk4	400.36	261.543	-0.614249	2.30254e-05	0.00109052
Sppl2b	342.591	520.637	0.603789	2.31817e-05	0.00109534
Rap1gap	862.351	1260.27	0.547391	2.41466e-05	0.00113824
Gnb2	314.768	481.159	0.612226	2.44215e-05	0.00114581
Lrp1	4597.55	6499.47	0.499457	2.44056e-05	0.00114581
Traf7	422.648	633.421	0.583708	2.50301e-05	0.00117162
Apod	111.226	185.774	0.740049	2.55292e-05	0.0011922
4933424G05Rik	237.373	147.431	-0.687111	2.58438e-05	0.00120129
Edc4	1066.69	1541.98	0.53164	2.57869e-05	0.00120129
Prpf8	1470.49	2100.3	0.514297	2.61235e-05	0.00121148
Ugt8a	373.297	559.664	0.584238	2.65002e-05	0.00122611
4933439C10Rik	453.29	676.702	0.578087	2.72432e-05	0.00125758
Adam15	659.127	961.211	0.544296	2.74944e-05	0.00126626
Atp13a1	759.667	1106.44	0.542488	2.79386e-05	0.00128377
Cpsf3l	230.29	355.678	0.62712	2.84067e-05	0.00130229
1700034H15Rik	86.2817	44.7481	-0.947228	2.85114e-05	0.0013025
Grin2c	1.69153	14.4144	3.09112	2.85414e-05	0.0013025
Rapgef4	2758.75	1938.65	-0.508963	2.86304e-05	0.00130359
4930519F16Rik	69.511	33.3878	-1.05792	2.89537e-05	0.00131533
Nucb1	243.832	378.39	0.633983	2.909e-05	0.00131853
AI854517	399.553	260.417	-0.617561	2.98076e-05	0.00134801
Vgf	419.79	623.092	0.569776	2.9918e-05	0.00134995
A530046M15Rik	52.7112	22.8479	-1.20605	3.05046e-05	0.00136718
Gltscr1l	1348.85	937.372	-0.525034	3.04735e-05	0.00136718
Hmgb4os	18.5747	3.97422	-2.22459	3.0459e-05	0.00136718
4921511I17Rik	97.5747	52.0305	-0.90715	3.06183e-05	0.00136921
Pitpnm2os1	85.3921	43.4127	-0.975984	3.07482e-05	0.00137196
Pank4	465.121	689.078	0.567059	3.14244e-05	0.00139901
Adck5	162.8	257.577	0.661905	3.17941e-05	0.00140756
Arrdc3	739.168	1070.76	0.534662	3.17537e-05	0.00140756
Dus1l	197.039	307.95	0.644213	3.1827e-05	0.00140756
B230209E15Rik	684.402	464.401	-0.559474	3.24093e-05	0.001427
Rn45s	294306	414996	0.495781	3.236e-05	0.001427
Cabp1	434.222	288.329	-0.590717	3.26612e-05	0.00143494
Gpr18	63.7723	29.6102	-1.10683	3.3078e-05	0.00145007
Synj2bp	1022.83	706.111	-0.534604	3.32527e-05	0.00145455
Rcn2	323.621	487.699	0.591689	3.36829e-05	0.00147016
Scg3	708.627	1023.82	0.530862	3.41307e-05	0.00148647
Fam193a	983.711	679.923	-0.532864	3.46134e-05	0.00150422
Snord118	78.2545	39.6102	-0.982303	3.59121e-05	0.00155728
Cx3cl1	1757.96	2483.03	0.498203	3.68473e-05	0.00159378
P2ry12	73.826	35.5397	-1.0547	3.69129e-05	0.00159378
Nfatc2	116.004	64.1341	-0.855017	3.7001e-05	0.00159415
Cspp1	1440.16	1005.56	-0.518236	3.76759e-05	0.00161974
Apba2	1124.84	785.205	-0.51858	3.89232e-05	0.00166804
Hist1h4i	30.0426	63.7348	1.08507	3.90491e-05	0.00166804
Ltk	497.143	729.571	0.553387	3.90075e-05	0.00166804
Nrg3	1074.91	745.469	-0.52799	3.95956e-05	0.00168304
Rps13	87.9548	153.451	0.80294	3.96269e-05	0.00168304
Slc2a13	1086.51	1547.99	0.510694	3.96524e-05	0.00168304
Arhgap20os	186.926	114.294	-0.709714	4.02435e-05	0.00170452
1700024B18Rik	31.2244	10.6597	-1.5505	4.10455e-05	0.00173117
Atxn7l3b	255.969	388.41	0.60161	4.10349e-05	0.00173117
Scaf8	1051.95	731.882	-0.523386	4.24705e-05	0.00178751
1700109K24Rik	429.528	285.57	-0.588909	4.26838e-05	0.00179272
Cnot4	1225.55	851.304	-0.525688	4.30531e-05	0.00180445
Atp6v0e2	240.425	369.118	0.618494	4.33418e-05	0.00181276
Ehmt1	731.872	501.44	-0.545514	4.34758e-05	0.00181457
Ciita	95.8604	50.3248	-0.929666	4.37819e-05	0.00181976
Ppp2r5b	334.887	500.68	0.580214	4.36947e-05	0.00181976
Fbxl6	278.826	419.666	0.589877	4.45156e-05	0.00184643
Tuba1a	219.047	338.469	0.627783	4.46907e-05	0.00184986
Hsp90b1	1767.69	2495.91	0.497704	4.52315e-05	0.00186839
Wdr78	353.818	232.619	-0.605037	4.53274e-05	0.00186849
Nova1	1242.46	867.229	-0.518716	4.67604e-05	0.00192361
Dtx3	636.073	924.986	0.54024	4.70735e-05	0.00192857
Smim13	563.08	822.459	0.546603	4.7023e-05	0.00192857
Tpi1	132.687	212.178	0.677253	4.74678e-05	0.00194075
Aldh1l2	109.896	60.9817	-0.849695	4.82926e-05	0.00197046
Omg	936.578	1338.62	0.515276	4.8832e-05	0.00198841
Kat5	292.883	440.117	0.587562	4.9325e-05	0.00200442
Apba3	149.848	238.825	0.672456	4.96784e-05	0.00201469
1810013L24Rik	967.975	667.482	-0.536241	5.10572e-05	0.00202966
1810034E14Rik	79.344	41.5074	-0.934752	5.09913e-05	0.00202966
4930447F24Rik	57.4521	25.75	-1.15779	5.08441e-05	0.00202966
Akap6	8625.73	11914.7	0.466024	5.02131e-05	0.00202966
Ccdc148	157.299	92.9453	-0.759051	5.04984e-05	0.00202966
Chga	271.067	407.025	0.586469	5.04399e-05	0.00202966
Mog	180.369	282.876	0.649221	5.07875e-05	0.00202966
Park2	213.227	132.328	-0.688273	5.08534e-05	0.00202966
Tmem259	490.874	718.209	0.54905	5.04632e-05	0.00202966
Tmsb4x	405.902	595.638	0.553306	5.1162e-05	0.00202966
Ttc7b	1772.17	1255.7	-0.497024	5.10889e-05	0.00202966
Vmn2r84	160.426	95.1938	-0.752973	5.18545e-05	0.00205307
Mapk10	2115.13	1501.35	-0.494483	5.22509e-05	0.00206468
A730017L22Rik	109.532	61.2615	-0.838302	5.2825e-05	0.00208326
Ap2m1	245.201	372.855	0.604651	5.34667e-05	0.00210442
Luzp2	119.185	193.098	0.696131	5.39772e-05	0.00211871
Nos1ap	977.399	683.773	-0.51543	5.40822e-05	0.00211871
Olfml1	26.2815	58.2774	1.14889	5.41468e-05	0.00211871
Fam134a	299.122	452.054	0.595759	5.45551e-05	0.00213052
Fam222b	255.024	164.586	-0.631793	5.51166e-05	0.00214578
Fut9	4120.25	5736.17	0.477358	5.52671e-05	0.00214578
Ppox	188.462	294.189	0.642468	5.52062e-05	0.00214578
Cdk9	901.952	1287.77	0.513758	5.55899e-05	0.00215413
H2-T24	354.9	236.604	-0.584935	5.7257e-05	0.00221445
Mcam	100.662	168.365	0.742074	5.82606e-05	0.00224893
Emc10	194.257	299.463	0.624412	5.92032e-05	0.00227218
Parm1	70.3234	122.771	0.803897	5.91245e-05	0.00227218
Tubb4b	80.0134	138.778	0.794467	5.91467e-05	0.00227218
Dym	418.249	277.829	-0.590163	5.99317e-05	0.00229574
Slc17a7	1746.06	2462.42	0.495974	6.02957e-05	0.00230527
Hapln2	283.58	427.578	0.592434	6.06896e-05	0.00231592
Apc	4497.94	3225.9	-0.479563	6.18044e-05	0.00235397
Gm16861	55.3107	24.7552	-1.15983	6.25409e-05	0.0023775
Degs1	171.594	268.432	0.645554	6.26844e-05	0.00237844
Fzr1	206.606	317.49	0.619828	6.37172e-05	0.00241306
Adcyap1	112.149	184.356	0.717081	6.41361e-05	0.00242434
1700095J12Rik	28.2957	9.02826	-1.64806	6.45211e-05	0.0024343
Rgs4	738.901	1054.05	0.512492	6.46425e-05	0.0024343
Ostm1	232.611	351.136	0.594109	6.49334e-05	0.00244067
Msto1	79.3902	137.057	0.787743	6.51255e-05	0.00244331
Sec24b	1168.1	828.11	-0.496263	6.54375e-05	0.00244585
Sema3a	457.544	662.972	0.535037	6.53205e-05	0.00244585
Srrm4	836.493	582.977	-0.520915	6.6533e-05	0.00248114
Syn3	797.136	553.053	-0.527407	6.66293e-05	0.00248114
Arxes1	18.1289	44.3398	1.29031	6.69991e-05	0.00249028
Prox2	147.411	87.2631	-0.756399	6.96837e-05	0.00258527
Aatk	872.727	1247.04	0.514905	7.04512e-05	0.00259267
Fam184a	512.608	348.85	-0.555248	7.04807e-05	0.00259267
Luc7l2	4760.39	3435.37	-0.470616	7.03274e-05	0.00259267
2020-03-02	322.154	211.141	-0.609548	7.04568e-05	0.00259267
Slc2a2	34.1786	12.3314	-1.47076	7.05303e-05	0.00259267
Actl6b	440.749	644.282	0.547737	7.10786e-05	0.00259536
Akt1	215.611	328.91	0.609263	7.09622e-05	0.00259536
Bag6	680.025	978.325	0.524727	7.11216e-05	0.00259536
C1galt1c1	105.325	170.546	0.695308	7.09031e-05	0.00259536
Sdc2	93.7345	157.132	0.745327	7.14699e-05	0.00260332
9330159F19Rik	2244.75	1606.47	-0.482661	7.19289e-05	0.00261529
Nup88	1100.97	1547.49	0.491159	7.28071e-05	0.00264242
Acot4	62.3695	30.04	-1.05396	7.35136e-05	0.00265634
Dancr	194.824	300.855	0.626894	7.35278e-05	0.00265634
Soga3	1764.45	1253.49	-0.493273	7.35884e-05	0.00265634
Sv2a	1038.19	1462.64	0.494514	7.40889e-05	0.0026696
2900041M22Rik	74.8539	38.0592	-0.975834	7.43062e-05	0.0026726
Pfkm	1035.31	1462.3	0.498169	7.44389e-05	0.0026726
Gaa	493.542	716.454	0.537699	7.48709e-05	0.0026833
Faim2	529.954	766.026	0.531526	7.52609e-05	0.00269246
Snora78	212.879	134.645	-0.660876	7.56336e-05	0.00270097
Gm16023	197.656	121.6	-0.700845	7.72325e-05	0.00275259
Nme3	75.5155	131.659	0.801956	7.7354e-05	0.00275259
Lrrc45	845.368	1199.99	0.505374	7.81093e-05	0.00277454
Gpaa1	199.44	305.031	0.613004	7.87935e-05	0.00279389
Zeb1	512.59	351.376	-0.54479	7.93339e-05	0.00280809
Por	235.721	357.933	0.60261	7.95101e-05	0.00280936
AW554918	303.36	199.167	-0.607053	8.01092e-05	0.00282554
Pcdha8	88.565	47.8863	-0.887123	8.09072e-05	0.00284867
Nsg2	455.935	656.715	0.52644	8.12322e-05	0.0028509
Zcchc18	1341.72	1885.88	0.491153	8.12552e-05	0.0028509
Maged1	1632.18	2276.99	0.480324	8.19347e-05	0.00286972
P4htm	301.862	443.949	0.556504	8.25825e-05	0.00288736
Epb4.1	1104.75	774.333	-0.512693	8.36378e-05	0.0029158
Srpk3	138.572	221.433	0.676234	8.3687e-05	0.0029158
Ercc2	230.926	351.136	0.604597	8.53461e-05	0.0029633
Recql5	299.341	443.366	0.566708	8.52368e-05	0.0029633
Ssna1	91.6443	152.882	0.738298	8.56457e-05	0.00296856
Ccdc110	35.0276	13.4333	-1.38268	8.64136e-05	0.00298774
Lrriq1	309.085	204.257	-0.597614	8.64975e-05	0.00298774
Gpr22	1043.54	1458.37	0.482872	8.69315e-05	0.00299757
Parp11	235.315	150.64	-0.643487	8.78524e-05	0.00302411
C1qtnf4	297.751	442.023	0.570014	8.80261e-05	0.0030249
Hsd3b5	12.9328	2.11421	-2.61284	8.84241e-05	0.00303337
Erbb3	51.6055	95.0055	0.880486	8.91079e-05	0.00304711
Zfp462	1014.9	706.61	-0.522349	8.9129e-05	0.00304711
Pgs1	211.238	134.078	-0.655802	8.94379e-05	0.00305227
Slco1c1	1.75205	13.1604	2.90909	8.95844e-05	0.00305227
Megf9	543.529	778.843	0.518974	8.98536e-05	0.00305624
Pcdhgb8	170.872	104.747	-0.706014	9.134e-05	0.00309629
Sirt7	385.862	563.645	0.546704	9.13261e-05	0.00309629
Trim9	4203.88	3043.47	-0.466002	9.16359e-05	0.00310107
A330102I10Rik	262.093	169.808	-0.626176	9.19437e-05	0.00310121
Gm14057	162.422	98.7651	-0.717674	9.21044e-05	0.00310121
Htra1	51.4149	94.7455	0.88187	9.20768e-05	0.00310121
Mrps26	142.691	224.773	0.655572	9.26033e-05	0.00311278
Sgcz	336.93	223.351	-0.593136	9.35732e-05	0.00313486
Tmem55b	333.127	490.406	0.557905	9.34835e-05	0.00313486
A730090N16Rik	101.723	56.5439	-0.847196	9.50784e-05	0.00317111
Mal2	710.458	1004.72	0.499966	9.50079e-05	0.00317111
Vstm2a	502.453	727.194	0.533351	9.51302e-05	0.00317111
Zbtb34	378.194	256.306	-0.561258	9.56048e-05	0.00318164
Rassf8	59.6202	28.3338	-1.07328	9.61607e-05	0.00319483
Sfxn5	270.898	176.762	-0.615943	9.67249e-05	0.00320826
Ndfip1	617.986	879.996	0.509923	9.73047e-05	0.00322215
Zfand2b	131.964	210.087	0.670844	9.84498e-05	0.00325469
Ednrb	4.20489	19.4587	2.21028	9.90337e-05	0.0032686
Chrd	572.773	821.501	0.520297	9.95097e-05	0.00327352
Nell1os	22.9493	6.96798	-1.71963	9.94389e-05	0.00327352
Ddx41	362.829	529.648	0.545743	0.000100033	0.00328533
U2af1l4	116.424	187.973	0.69114	0.000100251	0.00328711
Ech1	50.8473	94.3856	0.892396	0.000100741	0.00329564
Fmn2	1016.31	717.173	-0.502945	0.00010084	0.00329564
Rfx7	1525.93	1087.93	-0.488095	0.000101511	0.00331216
Akap9	2554.69	1831.61	-0.480031	0.000101679	0.00331225
9430021M05Rik	137.72	81.6454	-0.754296	0.000102555	0.00333537
Naca	622.361	435.367	-0.515521	0.000102989	0.00334404
Gnl3	716.963	1006.03	0.4887	0.000104069	0.00336819
Ldhd	161.471	252.157	0.643045	0.000103963	0.00336819
Ctsl	129.111	203.587	0.657034	0.000105003	0.00338517
Ftx	2448.74	1765.15	-0.472251	0.000105269	0.00338517
Rab3a	231.431	347.173	0.585069	0.000105112	0.00338517
Sh3pxd2a	464.946	317.476	-0.550416	0.000105247	0.00338517
Clptm1l	321.119	469.38	0.547651	0.000107013	0.00343574
Pik3r2	454.029	648.414	0.514132	0.000107779	0.00345481
Cmya5	247.96	159.642	-0.635262	0.000109075	0.00348519
Rbm33	3475.76	2519.62	-0.464123	0.000108975	0.00348519
Calm3	418.181	602.596	0.527061	0.000109484	0.00349269
Ccdc30	352.165	236.977	-0.571505	0.00010998	0.00350292
Abcb6	235.179	352.371	0.583337	0.000110629	0.00351801
Dpp7	222.307	334.658	0.590132	0.000111901	0.00355136
Vasn	371.38	248.253	-0.581083	0.000112033	0.00355136
Pcdh20	216.609	325.518	0.587642	0.000112742	0.00356259
Tubb5	318.213	470.318	0.563645	0.000112565	0.00356259
Bsg	306.219	450.126	0.555765	0.00011501	0.00360019
Ctgf	57.4563	102.816	0.839534	0.000115004	0.00360019
Edf1	62.8449	110.144	0.809518	0.000114657	0.00360019
Shisa7	1878.21	1358.41	-0.467443	0.000114969	0.00360019
Spata4	36.8171	15.1216	-1.28376	0.000114566	0.00360019
Zfp750	68.2115	33.8203	-1.01213	0.00011501	0.00360019
Atp13a2	712.773	1006.36	0.497634	0.000116036	0.00362662
Dnajc21	893.458	635.913	-0.490571	0.000116654	0.00363551
Hdac10	282.186	418.879	0.569886	0.000116683	0.00363551
Scrib	463.071	665.791	0.523835	0.00011735	0.00365062
Syngr1	621.54	877.317	0.497252	0.000118435	0.00367864
1700028K03Rik	243.766	159.24	-0.614289	0.000119701	0.00371222
Bmpr2	2157.93	2966.85	0.45928	0.0001207	0.0037259
Prkag2os1	102.158	56.9733	-0.842446	0.000120596	0.0037259
Ptgs2	215.877	324.878	0.58969	0.000120695	0.0037259
Vars2	182.373	281.425	0.625853	0.000120949	0.00372784
Cnih1	174.527	266.784	0.612217	0.000123259	0.00379318
Fbxw8	249.287	161.759	-0.62396	0.000124985	0.00384042
Mical3	3164.12	2298.43	-0.461153	0.000125464	0.00384923
Ptn	378.009	545.277	0.528568	0.000126064	0.00386173
Vapb	410.713	277.936	-0.563378	0.000126339	0.00386422
Ccl19	18.1418	4.77557	-1.92558	0.0001268	0.00386652
Klhl17	799.567	1127.29	0.49557	0.000126706	0.00386652
Csmd2os	30.1268	11.175	-1.43078	0.000128321	0.00390698
Cxcl17	29.5727	10.5044	-1.49327	0.000129704	0.00393116
Maml3	143.039	86.3571	-0.728019	0.000129449	0.00393116
Ndrg2	77.589	132.854	0.77592	0.000129637	0.00393116
Akt3	1667.39	1202.6	-0.471435	0.00013071	0.00393955
Aldoc	60.0534	106.666	0.828787	0.000130768	0.00393955
Angptl3	75.3961	39.3457	-0.938283	0.000130443	0.00393955
Lrrc16b	556.256	793.898	0.513204	0.000130383	0.00393955
4833422C13Rik	200.965	126.955	-0.662629	0.000131337	0.00395075
Cntn1	1797.26	2457.18	0.451202	0.000131595	0.00395258
Kcnf1	350.721	504.069	0.523299	0.000132536	0.0039749
Atf6b	225.302	340.022	0.593771	0.000134795	0.0040366
Psmb4	152.768	237.807	0.638447	0.00013555	0.00404711
Slitrk4	679.258	949.292	0.482893	0.000135449	0.00404711
1110032F04Rik	99.4119	161.819	0.702893	0.000136086	0.00405125
Syt14	1396.44	999.869	-0.481944	0.000136093	0.00405125
Epb4.1l1	1383.7	993.261	-0.478286	0.000136728	0.00406412
Tor3a	125.947	75.1023	-0.745894	0.000138247	0.00410316
4930587E11Rik	134.311	79.5615	-0.755439	0.000138837	0.0041051
Baz1b	2473.04	1788.81	-0.467286	0.000138608	0.0041051
Lyzl4	41.5402	17.3766	-1.25736	0.000139132	0.0041051
Nt5c	101.54	164.183	0.693258	0.000139066	0.0041051
Hmgcr	1956.83	2688.2	0.458123	0.00014009	0.00412123
Surf4	146.02	226.913	0.635976	0.000139927	0.00412123
Bckdk	149.536	232.114	0.634342	0.000140576	0.00412948
Neurl4	459.13	652.915	0.50799	0.000141409	0.00414786
BC029214	94.1752	156.372	0.731567	0.000143126	0.00419209
Psmb10	30.4183	63.015	1.05075	0.000144291	0.00422003
Rapgef3	50.3347	91.9853	0.869851	0.000147162	0.00429772
Uvssa	702.328	494.788	-0.505333	0.000148032	0.00431685
Mir7220	63.6179	31.7017	-1.00487	0.000149474	0.00435257
Rpl10a	144.14	224.646	0.640182	0.000150628	0.00437981
Stat2	454.543	652.825	0.522279	0.000152988	0.00444196
Adamts17	207.008	132.067	-0.648413	0.000153376	0.0044468
Tmem59l	451.256	646.971	0.519754	0.000154807	0.00448179
Snx17	224.369	338.393	0.592829	0.000157196	0.00454438
Dcaf11	431.759	618.997	0.519706	0.000158291	0.00455632
Nyap2	1107.57	786.525	-0.493839	0.000158124	0.00455632
Rps6kc1	336.08	226.835	-0.567166	0.000158056	0.00455632
Armc8	1224.17	873.835	-0.486368	0.000158894	0.00456712
Nomo1	211.814	317.527	0.584079	0.000160398	0.00460151
Rps2	135.716	214.435	0.65995	0.00016055	0.00460151
Rpgr	901.722	646.27	-0.480546	0.000162834	0.00466031
R3hdm1	19192.7	14150.7	-0.439686	0.000163179	0.00466353
Fzd3	1508.01	2067	0.454896	0.000164022	0.00468094
Vps16	524.677	743.104	0.502134	0.000165925	0.00472235
Vps51	227.373	339.71	0.57924	0.000165945	0.00472235
AI414108	1965.27	1429.04	-0.459688	0.000166625	0.00473498
Rraga	176.902	270.682	0.613644	0.000167303	0.00474753
E330033B04Rik	927.497	656.505	-0.498538	0.000168262	0.00476248
Gapdh	251.196	372.097	0.566866	0.00016912	0.00476248
Ipo4	506.61	726.432	0.519952	0.00016921	0.00476248
Mtcl1	1734.44	1262.41	-0.458293	0.000169265	0.00476248
Ptprn	2000.83	2754.08	0.460972	0.000169393	0.00476248
Ube2d2b	77.8659	42.1213	-0.886442	0.000169494	0.00476248
Zfp3	113.576	67.0439	-0.760485	0.000168774	0.00476248
Kantr	495.433	343.123	-0.529966	0.0001701	0.0047728
Prr16	396.628	272.429	-0.541904	0.000171612	0.00479508
Syt1	7212.73	9759.81	0.436309	0.000171307	0.00479508
Vps9d1	437.29	629.373	0.525325	0.000171446	0.00479508
Dlx6os1	73.7975	38.9679	-0.921286	0.000173013	0.00482492
Yipf4	212.442	316.277	0.57412	0.000173161	0.00482492
Dnmt3aos	44.5023	19.7523	-1.17186	0.000173722	0.00482891
Tmbim6	258.981	377.464	0.543494	0.000173787	0.00482891
Gper1	52.4619	25.1334	-1.06166	0.000174087	0.00483055
Scn9a	369.231	250.262	-0.561083	0.000177958	0.00493114
Taok3	739.521	523.667	-0.497942	0.000178451	0.00493796
2900079G21Rik	136.969	83.3993	-0.715747	0.000179406	0.00495755
Hnrnpu	9505.44	7005.47	-0.440271	0.000180412	0.00497082
Mgll	360.318	243.916	-0.562886	0.000180537	0.00497082
Miat	11995.5	8861.68	-0.436844	0.000180631	0.00497082
Map3k12	1000.97	1386.78	0.47034	0.000181959	0.00500051
Map3k9	1441.38	1043.8	-0.465612	0.000182815	0.00501716
Acadvl	235.907	349.332	0.566383	0.000186367	0.00510064
Mgat2	127.271	196.237	0.624692	0.000186236	0.00510064
Shank3	878.715	628.787	-0.482823	0.000189057	0.00516722
Gm15787	77.1225	41.6098	-0.890229	0.000191491	0.00522459
Shmt2	95.0708	156.183	0.716161	0.000191938	0.00522459
Tmed10	287.535	416.114	0.533243	0.000191707	0.00522459
Slc30a1	287.349	419.713	0.546598	0.000196093	0.00533042
Numb	950.439	681.084	-0.480761	0.000196809	0.00534265
Rtel1	394.346	562.052	0.511239	0.000198809	0.00538964
Rnf167	198.012	299.572	0.597311	0.000204164	0.00552732
Cpt1c	731.723	1017.5	0.475657	0.000204777	0.00552899
Gria3	6998.24	5160.69	-0.439429	0.000204652	0.00552899
Setbp1	1360.41	984.097	-0.467174	0.000205818	0.00554961
Gm20752	36.0951	14.8397	-1.28234	0.000206219	0.00555295
Hmgb4	20.5579	5.911	-1.79822	0.000206575	0.00555507
Slc39a10	1857.56	2534.29	0.448173	0.000208036	0.00558686
Ddost	190.735	284.452	0.57662	0.000208499	0.0055918
Prkcsh	399.583	570.633	0.514066	0.000211795	0.00567151
Tmem106b	1146.49	1577.63	0.460544	0.000212037	0.00567151
Dgkh	1354.48	980.383	-0.466317	0.000213841	0.00571211
Ncstn	365.484	524.758	0.521845	0.00021486	0.00573036
Npy	4.69925	18.8587	2.00473	0.000215096	0.00573036
Ndn	65.602	112.867	0.782819	0.000217686	0.00579166
Senp8	257.579	172.642	-0.57723	0.000219387	0.00582917
Ldb2	418.075	288.108	-0.537154	0.00021997	0.00583693
Abca17	70.9766	37.8687	-0.906336	0.000221105	0.00585929
Ak5	560.837	393.976	-0.509474	0.000222545	0.00588966
Cxxc1	524.618	740.073	0.496401	0.00022409	0.00592272
Zfat	326.496	222.249	-0.554888	0.000224779	0.00593311
Sstr2	117.438	183.204	0.641553	0.000225589	0.00594665
Gpr21	244.667	161.624	-0.598181	0.000226052	0.00595103
Zmym1	1154.26	836.969	-0.463719	0.000229944	0.00604553
Rnasek	80.06	132.994	0.732203	0.000230666	0.00605656
Eif4g2	2075.1	2830.3	0.447773	0.000232074	0.00608557
Mrpl32	145.972	221.788	0.603492	0.000233233	0.00610796
Myt1l	2984.99	2188.38	-0.447862	0.000233794	0.00610917
Tm2d2	55.6735	98.8196	0.827805	0.000233889	0.00610917
Izumo4	292.779	425.311	0.538704	0.000236022	0.00615687
Scn2b	450.029	633.195	0.492632	0.000236364	0.00615776
Amfr	465.835	657.011	0.496097	0.000237049	0.00616759
Colgalt1	872.473	1209.82	0.471608	0.000237798	0.00617904
Samd12	179.82	113.465	-0.66431	0.000238539	0.00619028
Spaca6	294.021	197.54	-0.573769	0.000238854	0.00619042
Lrp12	373.159	535.016	0.519793	0.000239584	0.00620133
Ids	740.364	1021.89	0.464934	0.000241182	0.00623462
Ric8	389.93	554.811	0.50878	0.000243786	0.00629382
Rpl13a	166.842	250.234	0.58479	0.000246177	0.00634737
Tm9sf2	554.2	770.955	0.476239	0.000247071	0.00636225
Iqsec3	1066.54	769.994	-0.47002	0.000248059	0.00637949
Adrm1	120.473	188.171	0.643336	0.000248597	0.00638175
Dner	186.662	276.807	0.568455	0.000248784	0.00638175
Slc25a23	730.848	524.609	-0.47833	0.000251755	0.0064497
Id2	233.059	341.406	0.550794	0.000253626	0.00646456
Lmbrd2	720.822	997.992	0.469386	0.000253402	0.00646456
2020-03-06	1438.26	1956.73	0.444124	0.000253619	0.00646456
Tmem229a	197.749	292.186	0.56322	0.000252676	0.00646456
Gm3414	646.366	457.775	-0.497713	0.000254631	0.00648193
Cdc42bpa	5670.52	4192.18	-0.435781	0.000255443	0.00649434
Dio2	11.612	31.4352	1.43677	0.000256158	0.00650427
Snhg9	114.777	182.596	0.669827	0.000257746	0.00653631
Sepp1	54.749	97.1655	0.827611	0.000259587	0.00657467
Fam78b	294.976	199.549	-0.563853	0.000261129	0.00660537
Tnfrsf21	315.739	451.99	0.517556	0.000262648	0.00663542
Cyr61	51.9929	91.8332	0.8207	0.000264776	0.00668077
Rgs11	832.379	1153.47	0.470664	0.000265714	0.00669598
Adgrg1	31.1422	62.3166	1.00074	0.000267434	0.00673088
Dnpep	87.3329	143.711	0.718576	0.000268249	0.00673445
Ppm1l	419.812	593.649	0.499867	0.00026821	0.00673445
Snora7a	210.272	137.203	-0.615947	0.000270398	0.00677992
9930021J03Rik	1232.3	896.309	-0.459284	0.000271037	0.00678745
Whsc1l1	2674.76	1971.04	-0.44045	0.000271394	0.00678791
Taf15	734.939	527.906	-0.477343	0.000272332	0.00680287
Ppm1b	551.921	389.174	-0.504047	0.000272851	0.00680736
Acsbg1	9.24709	26.6702	1.52816	0.000276234	0.00688318
Syngr3	279.951	405.5	0.534526	0.000277237	0.00689958
Rxfp1	409.27	285.046	-0.521856	0.000277955	0.00690886
Pcdha11	119.665	73.3101	-0.706917	0.000280179	0.00695553
Tuba4a	286.35	412.577	0.526886	0.000280577	0.00695678
Nop56	624.797	867.159	0.472909	0.000282414	0.00699368
Mtmr12	754.11	541.296	-0.478357	0.000282771	0.00699388
Pcdhac1	96.0574	55.3591	-0.795076	0.000288049	0.00711562
Pdzrn4	158.197	99.0017	-0.676199	0.000288745	0.00712404
Atad3a	448.139	630.441	0.492414	0.000290484	0.00715813
Adgrb2	2426.78	3291.9	0.439876	0.000291958	0.00718562
Fam189b	263.28	385.212	0.549058	0.00029232	0.0071857
Rgsl1	155.802	97.0106	-0.6835	0.00029862	0.00733155
Exoc4	790.419	567.739	-0.47739	0.000299658	0.00734805
Rpl41	132.558	205.395	0.631778	0.000300861	0.00736852
Tmem145	979.027	1354.54	0.468384	0.000302057	0.00738877
Snord49a	111.989	65.6976	-0.76945	0.000305872	0.00747297
Dusp6	421.621	594.743	0.496319	0.000310777	0.0075755
Pdgfra	4.16942	17.1325	2.03881	0.000310825	0.0075755
Zfp831	311.88	212.593	-0.552893	0.000312774	0.00761374
Blcap	255.443	170.229	-0.58552	0.000313715	0.00762739
Chd2	1592.38	1167.97	-0.447179	0.000314497	0.00763713
Hsbp1	190.203	280.115	0.558482	0.000317337	0.00769677
Agrn	2494.09	3380.9	0.438893	0.000321198	0.00778098
Adam11	1183.2	1617.39	0.450973	0.000324872	0.0078605
Hspa8	654.862	904.83	0.466456	0.000327873	0.00792354
Rps18	37.786	71.0467	0.910916	0.00032881	0.00793659
Rhbdf1	58.24	100.55	0.787825	0.000329306	0.00793901
Gpr162	610.802	850.027	0.476804	0.000329756	0.00794029
Chgb	1578.37	2134.25	0.435297	0.00033156	0.00795912
Nptx2	149.127	223.913	0.586394	0.000332233	0.00795912
Nsun4	115.781	70.6038	-0.713579	0.000332524	0.00795912
Pdia6	368.939	520.922	0.497686	0.000332503	0.00795912
Syvn1	351.304	501.635	0.513916	0.000331058	0.00795912
Snora20	73.4374	40.4623	-0.859939	0.000338516	0.00809289
4930428E07Rik	24.8617	8.87991	-1.48531	0.000339377	0.00810379
Arhgef2	1996.84	2702.67	0.436664	0.000339988	0.00810871
1700024P16Rik	167.377	104.529	-0.679201	0.000340672	0.00811244
Pgp	70.6763	118.03	0.739858	0.000340954	0.00811244
Grina	904.503	1248.2	0.464656	0.00034459	0.00818
Mtus2	1013.14	729.811	-0.473234	0.00034461	0.00818
Acr	37.9526	16.6487	-1.18879	0.000347148	0.0082305
Mrpl12	50.2539	88.8956	0.822878	0.000351498	0.00832378
Cdk12	1813.98	1334.39	-0.442982	0.000353877	0.00837021
Usp5	404.338	565.351	0.483586	0.000355143	0.00839026
2610015P09Rik	248.566	165.656	-0.585436	0.000355607	0.00839131
Taz	448.161	630.287	0.491992	0.000359679	0.00847743
Mir3068	69.6105	36.8505	-0.91762	0.00036157	0.00851198
Spock1	1445.15	1950.17	0.43238	0.000365587	0.00859644
Hsp90aa1	492.434	687.391	0.481199	0.000367094	0.00862175
Flot1	408.828	572.254	0.485162	0.000369405	0.00865777
Tpgs2	466.802	329.066	-0.504433	0.000369492	0.00865777
Bcas3os2	8.24913	0.829416	-3.31407	0.000370807	0.00866833
Farsa	230.128	336.829	0.54958	0.000370749	0.00866833
Ctu2	114.585	178.142	0.636611	0.000371729	0.00867974
Dnajb4	507.383	361.376	-0.489575	0.000374608	0.00873118
Rgl2	428.562	603.991	0.495022	0.000374804	0.00873118
Kcnk18	13.6516	3.05642	-2.15916	0.000377461	0.00878287
Ppp3r1	924.391	1262.01	0.449147	0.000382832	0.0088872
Srcin1	1922.69	1419.76	-0.437477	0.000382505	0.0088872
4931406H21Rik	58.5401	29.886	-0.969955	0.000384241	0.00889928
Adrbk1	339.908	484.103	0.51017	0.00038395	0.00889928
Abcb8	149.577	227.567	0.605401	0.000385107	0.00890904
Ranbp2	7945.62	10544.5	0.408252	0.000387277	0.00894891
Prmt6	260.848	370.807	0.507459	0.000388648	0.00897026
2310069G16Rik	99.272	58.4346	-0.764563	0.000393347	0.00898554
Ascc2	434.455	307.933	-0.496591	0.000389935	0.00898554
Dennd1a	674.521	482.061	-0.484647	0.00039228	0.00898554
Gm10677	149.308	95.7702	-0.640644	0.000393051	0.00898554
Hist1h1c	18.1398	40.9359	1.17421	0.000390979	0.00898554
Pomgnt1	343.224	485.686	0.500876	0.00039157	0.00898554
Ssr4	210.453	305.955	0.539821	0.000393166	0.00898554
Surf1	161.074	241.257	0.582849	0.000391233	0.00898554
Wdr24	256.37	369.417	0.527024	0.000391894	0.00898554
Tmem130	255.564	369.694	0.532645	0.000394721	0.00900665
Igsf9b	1613.96	1187.57	-0.442591	0.000398123	0.00907393
Rpl3	200.217	292.942	0.549049	0.000400436	0.00911629
Dcaf12l1	53.1733	94.3133	0.826758	0.000401559	0.00913148
Crtc1	586.251	422.39	-0.472943	0.000407848	0.00925547
Plxnb2	403.391	564.388	0.48451	0.000407936	0.00925547
Fam171a2	240.61	347.854	0.531783	0.000410217	0.00927572
Mrpl4	154.289	231.496	0.585354	0.000409501	0.00927572
2020-09-04	692.645	951.736	0.458445	0.000409823	0.00927572
Trim28	562.237	776.549	0.465898	0.000413827	0.00934681
Actb	1593.12	2161.96	0.440488	0.000414592	0.00935354
St6galnac3	196.068	129.378	-0.599754	0.000417386	0.00940598
Gprc5b	131.934	202.24	0.616253	0.00042129	0.00947878
Isyna1	205.403	300.309	0.547988	0.000421563	0.00947878
Mlx	234.466	339.237	0.532912	0.00042299	0.00948957
Snph	721.459	520.838	-0.470085	0.000422589	0.00948957
P3h3	212.929	311.865	0.550547	0.00042665	0.00956098
Use1	133.831	204.18	0.609431	0.000431059	0.00964898
Ctnnd2	1381.48	1014.75	-0.445095	0.00043285	0.00967825
Atp5k	78.2304	126.565	0.694079	0.000434316	0.0097002
Hs6st2	174.813	260.066	0.573066	0.0004373	0.00975598
Fam3c	212.577	306.336	0.527128	0.000439257	0.00978875
Sycp2	602.062	428.476	-0.490696	0.000442986	0.00986087
Mir1188	128.369	78.9914	-0.700529	0.000446169	0.0099207
Mrpl28	84.0033	134.413	0.678153	0.000447716	0.00994405
Slc2a6	296.296	425.676	0.522717	0.000450322	0.00999088
Atp9a	916.887	1246.39	0.442938	0.000455769	0.0101005
Rasgrf1	2595.88	1933.08	-0.42532	0.000458227	0.0101438
Cep250	435.736	307.093	-0.50478	0.00045943	0.0101592
Mir1927	23.0128	7.93469	-1.53619	0.00046262	0.0102185
Pcyt2	338.687	480.052	0.503236	0.00046386	0.0102345
Itga11	45.8679	22.2923	-1.04094	0.00046947	0.0103469
Pcdh19	334.459	471.204	0.494522	0.000472684	0.0104063
Lrrc16a	795.043	577.393	-0.461481	0.000473707	0.0104133
Tom1l2	931.232	683.32	-0.446578	0.000474041	0.0104133
Atg16l2	279.879	399.491	0.513357	0.000475695	0.0104154
Creb3	120.949	183.927	0.60474	0.00047483	0.0104154
Sel1l	1559.52	2092.45	0.424089	0.000475693	0.0104154
Calm1	3407.04	4544.46	0.415591	0.000476251	0.0104162
1600002H07Rik	127.162	195.427	0.619969	0.000482669	0.0105093
1810037I17Rik	58.1457	99.0425	0.768375	0.000481598	0.0105093
Adrbk2	1020.37	744.418	-0.454902	0.000484206	0.0105093
Fsd1	225.12	329.312	0.548758	0.000482397	0.0105093
Hras	118.652	183.136	0.626173	0.000483969	0.0105093
Per1	1068.76	1452.15	0.442247	0.000481271	0.0105093
Scarb2	286.636	406.327	0.503423	0.000484708	0.0105093
Sorbs1	1179.64	866.386	-0.445268	0.000484552	0.0105093
Mir222	49.4949	23.9689	-1.04612	0.000486989	0.0105474
Mir876	30.0641	12.3257	-1.28637	0.000490671	0.0106157
Dph6	298.396	206.824	-0.528824	0.000492483	0.0106434
Cnp	126.86	194.113	0.613658	0.000494428	0.0106591
Glg1	891.56	1204.96	0.434584	0.000494805	0.0106591
Tnrc6c	2513.18	1882.13	-0.417144	0.000494083	0.0106591
Ccdc66	574.325	409.175	-0.489149	0.000497648	0.0106915
Nov	283.415	402.808	0.507175	0.000497914	0.0106915
Pld3	1456.6	1949.76	0.42069	0.00049711	0.0106915
Lypd6	21.735	45.9517	1.0801	0.000499942	0.0107236
Megf10	125.139	190.136	0.603498	0.00050165	0.0107258
Neurl1b	353.84	247.008	-0.51854	0.000500956	0.0107258
Pcdh10	2731.2	3642.18	0.415264	0.00050133	0.0107258
Mrps34	59.3693	100.177	0.754757	0.000504126	0.0107558
Slc39a12	4.67254	17.1333	1.87452	0.000503901	0.0107558
Vps28	144.969	217.202	0.583293	0.000505006	0.0107631
Tmed9	173.038	254.092	0.554262	0.000508607	0.0108283
Npdc1	661.145	909.492	0.460094	0.000509879	0.0108439
Fibp	192.659	283.541	0.557506	0.000510792	0.0108517
Ergic3	77.5548	125.38	0.693018	0.000517803	0.0109774
Grk6	403.778	565.652	0.486352	0.000517748	0.0109774
1700007J10Rik	91.3804	54.0243	-0.758276	0.000518429	0.0109791
Ifrd2	89.3861	144.158	0.689534	0.000519035	0.0109803
Slc6a1	154.626	230.18	0.573981	0.00052141	0.0110189
Rab43	131.746	82.112	-0.68209	0.000523119	0.0110434
Mid1ip1	33.6276	63.5118	0.91738	0.000526322	0.0110993
Nsmf	942.701	1285.94	0.447949	0.000529423	0.0111412
Spcs3	902.245	1218.09	0.433035	0.000528899	0.0111412
Unc5b	51.3407	88.703	0.788879	0.000531151	0.0111659
4930447A16Rik	99.0096	58.356	-0.762687	0.00053231	0.0111785
Cers2	349.049	490.53	0.49091	0.000533776	0.0111976
Otud3	192.308	126.948	-0.599174	0.000539491	0.0113056
Pias2	1631.2	1208.37	-0.432869	0.000540618	0.0113174
Adamts10	250.68	361.875	0.529647	0.000544239	0.0113813
Rps8	98.7415	154.319	0.644184	0.000549281	0.0114748
Rps6kb2	472.331	652.604	0.466409	0.00055364	0.0115538
Pcdh8	83.1795	130.964	0.654867	0.000557847	0.0116295
B3galt2	1525.61	2030.71	0.412596	0.000560228	0.011667
Slc35b2	67.9701	112.059	0.721281	0.000563866	0.0117305
Erdr1	786.784	1078.77	0.455347	0.000570933	0.0118529
Glul	269.067	381.449	0.503523	0.000570552	0.0118529
Chd4	2831.01	3742.12	0.402536	0.000573689	0.0118923
Upf1	592.322	813.878	0.45843	0.000574016	0.0118923
Atp2a2	5036.64	6672.24	0.405711	0.000575085	0.0119021
Tmco6	205.647	297	0.530296	0.000576193	0.0119127
Gabbr1	2268.13	3023.65	0.414786	0.000578417	0.0119341
Lgi3	491.947	679.645	0.466279	0.000577831	0.0119341
Scamp1	461.214	631.91	0.454283	0.000583768	0.0120321
Gpr158	1979.34	2615.8	0.402232	0.000584896	0.012043
Cacna1d	2768.72	2074.45	-0.416487	0.000588672	0.0120959
Plcb4	645.755	471.243	-0.454516	0.000588429	0.0120959
Tardbp	3273.7	2462.52	-0.410788	0.000592346	0.0121589
Acd	204.801	297.964	0.540912	0.000594675	0.0121941
Rps21	75.4524	122.321	0.697029	0.000595277	0.0121941
Lingo2	965.231	710.351	-0.442343	0.000601092	0.0123006
4930469G21Rik	115.165	71.2889	-0.691949	0.000603982	0.0123372
Gm10336	211.79	141.793	-0.578844	0.000604111	0.0123372
Sh3glb2	890.361	1209.89	0.442415	0.000609237	0.0124292
D330050G23Rik	89.7746	52.6202	-0.770689	0.000610822	0.0124488
Fkrp	125.62	191.396	0.607499	0.000613838	0.0124831
Lrrc49	757.043	549.475	-0.462322	0.000614372	0.0124831
Mir7667	29.3821	12.1785	-1.27061	0.000614348	0.0124831
Tmem147	177.647	261.732	0.55908	0.000615785	0.0124991
Gsn	96.4105	150.223	0.639845	0.000616986	0.0125108
Ubn2	3796.39	2844.39	-0.416506	0.000618709	0.0125331
Slc17a6	189.069	274.729	0.539096	0.000619501	0.0125365
Atp1b2	240.755	347.092	0.527754	0.000621222	0.0125586
Mtr	314.26	217.976	-0.527794	0.000624335	0.0126088
Abhd12	442.227	607.223	0.457439	0.000625565	0.0126105
Lppr4	1879.75	2497.71	0.410064	0.000625678	0.0126105
Flna	1456.65	1957.24	0.426164	0.000627779	0.0126401
Cc2d1b	487.276	668.565	0.456329	0.00063043	0.0126647
Sf3b1	6972.01	9209.94	0.401617	0.000629904	0.0126647
Tex15	50.3766	25.8545	-0.962335	0.000630895	0.0126647
Scn1b	480.322	663.632	0.466383	0.000633992	0.0127141
Apobec4	88.2871	51.6335	-0.773894	0.00063488	0.0127192
Mybbp1a	701.236	956.019	0.447138	0.00063797	0.0127683
Lcor	458.411	326.086	-0.491389	0.000639328	0.0127827
Scmh1	563.062	406.661	-0.469468	0.000641025	0.0127932
Zfp652	337.716	233.773	-0.530699	0.000641129	0.0127932
4933416C03Rik	54.2823	27.7186	-0.96963	0.000643563	0.0128171
Fbxl17	1562.57	1163.13	-0.425909	0.000643606	0.0128171
Ppil2	378.988	525.589	0.471782	0.000650138	0.0129343
Mgea5	2271.52	1708.77	-0.410699	0.000654055	0.0129993
Tcp1	472.755	650.721	0.460946	0.00065832	0.0130711
Cd163	44.8805	22.0141	-1.02766	0.000663887	0.0131686
Kcnc1	887.989	656.586	-0.435558	0.000672776	0.0133054
Khdrbs3	1086.09	806.185	-0.429966	0.000671748	0.0133054
Olfr690	14.8277	3.75795	-1.98028	0.000672718	0.0133054
Sh3rf3	518.549	374.855	-0.468149	0.000681124	0.0134572
Pcdh17	684.138	918.421	0.42487	0.000682054	0.0134623
Pnkp	198.055	284.621	0.52314	0.000690486	0.0136154
Syt17	177.06	119.132	-0.571676	0.000691965	0.0136311
Pex6	153.943	228.091	0.567211	0.000696407	0.0137051
Tmem208	190.304	276.285	0.537851	0.000700165	0.0137521
Xist	108658	142480	0.390964	0.000699568	0.0137521
Htra2	140.738	211.833	0.58991	0.000703021	0.0137946
Mt1	27.7844	53.4224	0.943168	0.000703948	0.0137993
Mir6336	15.2835	4.39392	-1.79839	0.000711804	0.0139397
Larp1b	203.355	137.24	-0.567299	0.000714199	0.0139729
Grip1os1	23.562	8.38157	-1.49117	0.000723019	0.0141071
Phf21a	624.296	452.871	-0.46313	0.000723168	0.0141071
Rps27a	138.783	205.387	0.56551	0.000722981	0.0141071
Dos	583.67	800.23	0.45526	0.000725768	0.014144
C130046K22Rik	22.6432	7.95069	-1.50993	0.000733493	0.0142695
Pip5kl1	95.5296	150.487	0.655619	0.000733631	0.0142695
Nefl	367.339	512.515	0.480484	0.000739205	0.0143508
Scn2a1	5399.84	7092.72	0.393424	0.000739246	0.0143508
Gm5820	31.665	13.9948	-1.178	0.000741732	0.0143851
Phactr3	639.912	468.063	-0.45117	0.000745479	0.0144438
Uqcr10	94.331	148.507	0.654724	0.000747455	0.0144681
Chpf	185.232	269.82	0.542664	0.000754797	0.0145692
Tprgl	164.903	242.784	0.558051	0.000753762	0.0145692
Usp20	290.374	411.134	0.501697	0.000754857	0.0145692
6530402F18Rik	286.854	202.409	-0.503041	0.000756678	0.0145903
D630041G03Rik	183.442	122.552	-0.58193	0.000760209	0.0146161
Mfsd5	41.1689	73.6412	0.838957	0.000760169	0.0146161
Pfdn5	40.1381	71.0195	0.823244	0.000759486	0.0146161
Slc25a39	110.26	167.176	0.600458	0.000761816	0.014633
Grip1os2	16.8164	4.95771	-1.76213	0.000764306	0.0146668
Cdc14b	400.887	285.746	-0.488461	0.000765383	0.0146701
Lrrc4b	339.659	471.755	0.473951	0.000765943	0.0146701
Igf2	0.382068	7.06812	4.20942	0.000771555	0.0147518
Ppp1r14b	18.0002	39.7064	1.14136	0.000771683	0.0147518
Eno2	935.945	1262.22	0.431472	0.000775048	0.0147885
Kmt2e	3214.72	2429.1	-0.404272	0.00077578	0.0147885
Sirpa	1486.92	1972.76	0.407887	0.000775819	0.0147885
Gm19461	87.5996	52.7882	-0.730707	0.000781627	0.0148754
Sv2b	2362.27	3116.85	0.399917	0.000781861	0.0148754
Clic4	37.0541	67.2528	0.859961	0.000786288	0.0149454
Tmem56	473.964	647.983	0.451177	0.000789886	0.0149996
Herpud1	284.027	397.993	0.486713	0.000791615	0.0150182
Scube3	165.677	110.888	-0.579274	0.000796643	0.0150993
Car11	598.926	816.615	0.447279	0.000806228	0.0152377
Robo3	873.846	1177.05	0.429727	0.000805983	0.0152377
Tgoln1	235.105	335.632	0.513579	0.000805157	0.0152377
Gm1673	60.6562	100.71	0.731481	0.000807031	0.0152385
Dnah17	69.4665	38.6338	-0.846455	0.000813308	0.0153426
Rpph1	614.306	833.91	0.440934	0.00081455	0.0153515
Ap2a1	817.612	1099.5	0.427364	0.000819066	0.0154222
Mir341	167.172	111.083	-0.589694	0.000820669	0.0154378
Dbn1	1911.21	2540.42	0.410581	0.000828187	0.0155584
Rps25	80.2597	126.562	0.657099	0.000828631	0.0155584
Hdac8	144.475	94.473	-0.61285	0.000830949	0.0155727
Pfas	461.65	633.579	0.456726	0.000830474	0.0155727
Snora16a	212.606	144.823	-0.553891	0.000834006	0.0156154
Ammecr1	164.224	107.152	-0.61601	0.000835529	0.0156293
Mrpl41	295.498	413.604	0.485102	0.0008453	0.0157973
Abcd4	99.2761	153.704	0.630635	0.000846569	0.0158063
Igsf6	104.073	63.7132	-0.707927	0.000847723	0.0158131
Pusl1	178.47	261.146	0.549171	0.000851827	0.0158749
Dgkz	2742.8	3636.58	0.406932	0.000853851	0.0158978
Itsn1	1604.07	1200.95	-0.417561	0.000857103	0.0159435
Ttyh2	134.007	200.895	0.584134	0.000859069	0.0159653
Mir6989	40.5171	19.2322	-1.07501	0.000861021	0.0159867
Spcs1	72.419	116.885	0.690655	0.000862703	0.0160031
Ndufaf3	59.5538	100.524	0.755272	0.000869287	0.0160955
Syt4	1756.77	2322.11	0.40251	0.00086886	0.0160955
Akap8l	2919.52	3866.07	0.405137	0.000872727	0.0161413
Mien1	35.2234	65.6743	0.898794	0.000873376	0.0161413
2900055J20Rik	584.914	429.415	-0.445851	0.000883442	0.0162898
B2m	114.165	173.544	0.604174	0.000885621	0.0162898
Galnt16	301.728	418.851	0.47319	0.000886287	0.0162898
Gpx1	29.5901	56.3288	0.928757	0.000885487	0.0162898
Rasgrp2	102.149	157.225	0.622159	0.000886079	0.0162898
Slc38a3	18.7188	40.0352	1.09678	0.000882735	0.0162898
Adarb2	119.975	77.5949	-0.628702	0.000888031	0.0162924
Man2c1	576.184	786.36	0.44866	0.000888058	0.0162924
Etohi1	469.645	338.512	-0.472367	0.00089118	0.0163348
Ctdspl	595.315	438.01	-0.442692	0.000894612	0.0163827
Gm2a	64.4984	104.295	0.693332	0.000896544	0.0164031
Uqcrc1	405.829	556.051	0.454347	0.0009002	0.0164549
Hsf4	87.5377	136.253	0.638311	0.000903557	0.0165012
Serpine2	129.915	192.893	0.570237	0.000914464	0.0166852
Pdia4	174.405	253.234	0.538031	0.00091665	0.0167025
Terf2	255.761	176.948	-0.53147	0.00091708	0.0167025
Phactr1	2319.76	1743.81	-0.411735	0.000921082	0.0167602
G530011O06Rik	54.7324	28.6404	-0.934344	0.000923305	0.0167854
Rbfox3	1298.6	978.407	-0.408449	0.000927799	0.0168518
Sulf2	533.14	725.29	0.444045	0.000928934	0.0168571
Nell2	1702.07	2230.81	0.390278	0.000931196	0.0168829
Smg6	806.099	596.858	-0.433568	0.000938365	0.0169845
Tmem107	77.7893	123.267	0.664141	0.000938495	0.0169845
Bcl11a	1608.97	1206.66	-0.415117	0.000944725	0.0170818
Sfswap	1269.51	951.699	-0.415691	0.000945695	0.0170839
Grem2	51.7043	87.3143	0.755932	0.000949207	0.0171239
Gxylt1	440.281	319.037	-0.464702	0.00094962	0.0171239
Psmd3	463.17	635.721	0.45685	0.000954111	0.0171894
Tmem256	61.362	101.593	0.727381	0.000955294	0.0171953
Cd200	249.47	347.998	0.480208	0.000956927	0.0172092
Paqr4	71.4971	113.111	0.661786	0.00096038	0.0172558
Ache	163.726	239.202	0.546948	0.00096606	0.0173113
Tle2	576.277	786.88	0.449383	0.000965293	0.0173113
Tpm3	552.56	404.489	-0.450031	0.000965073	0.0173113
Vars	298.921	418.973	0.487094	0.000969164	0.0173514
Akap5	1136.32	852.816	-0.414067	0.000976968	0.0174443
Dhps	123.489	183.812	0.573857	0.000976861	0.0174443
Fbxw9	160.188	233.534	0.543867	0.000977836	0.0174443
Gm10754	36.2212	16.8709	-1.1023	0.000976079	0.0174443
Cope	246.256	348.636	0.501563	0.00098347	0.0175136
Grm7	2104.38	1593.15	-0.401516	0.00098334	0.0175136
Prkcg	830.54	617.131	-0.428472	0.000994978	0.0177028
Il1rapl1	1024.33	766.531	-0.418264	0.00100506	0.0178631
Ywhag	632.117	851.542	0.429887	0.00100577	0.0178631
D10Wsu102e	323.762	228.848	-0.500545	0.00100879	0.0178887
Olfr78	168.84	113.565	-0.572144	0.001009	0.0178887
Atp6v0b	541.775	733.82	0.437733	0.00101297	0.0179274
Hacd4	166.254	110.624	-0.587723	0.00101222	0.0179274
Mertk	2.86128	13.8092	2.2709	0.00101737	0.0179893
Slc27a1	337.461	469.15	0.475325	0.00101924	0.0180065
Emc7	157.436	230.696	0.551223	0.00102415	0.0180615
Trappc9	386.282	278.26	-0.473221	0.00102387	0.0180615
Rps5	67.3191	110.117	0.709948	0.00102524	0.0180648
Bmp2	14.2306	32.4351	1.18856	0.00102626	0.0180668
Tmem9b	223.65	320.14	0.517461	0.00102925	0.0181035
Prkd3	105.112	159.678	0.603235	0.00103075	0.0181141
Dnajb1	148.23	214.664	0.534245	0.00103434	0.0181613
Ssh3	690.243	934.452	0.437017	0.00103559	0.0181673
Pou2f2	162.725	109.127	-0.57643	0.00103669	0.0181706
Klc2	483.78	656.924	0.441378	0.00105156	0.0184061
Rmst	149.182	97.709	-0.610511	0.00105196	0.0184061
Mir466i	50.3359	26.5091	-0.925101	0.0010537	0.0184204
Psmc3	271.506	381.003	0.488818	0.00105812	0.0184815
Pcdh15	1704.61	1287.67	-0.404682	0.00106552	0.0185946
2900097C17Rik	276.15	385.485	0.481225	0.00106802	0.018622
Ncaph2	309.213	427.551	0.467497	0.00106948	0.0186313
Dlgap3	433.206	312.192	-0.472619	0.00107195	0.0186334
Jtb	248.522	350.658	0.496692	0.00107098	0.0186334
Tfr2	89.877	140.072	0.640141	0.00107239	0.0186334
Lrrc28	205.948	141.068	-0.545892	0.00107855	0.0187242
Tyro3	1115.21	1484.13	0.412303	0.00108029	0.0187382
Dapk3	193.901	277.73	0.518366	0.00108231	0.0187535
Rbm3	367.963	505.45	0.458009	0.00108398	0.0187535
Snhg1	248.048	349.807	0.495937	0.00108341	0.0187535
Ankef1	45.1293	22.5339	-1.00197	0.00108902	0.0188243
Psmc5	153.653	223.057	0.537729	0.00109343	0.0188842
Cep89	330.634	234.707	-0.494372	0.00109737	0.0189196
Rai14	401.793	290.839	-0.466235	0.00109684	0.0189196
Atp2b2	5800.45	7545.2	0.379395	0.00110195	0.018966
Nbea	7386.92	5646	-0.387744	0.00110165	0.018966
Zfp598	406.206	554.349	0.448584	0.0011088	0.0190675
Bscl2	389.185	537.442	0.465653	0.00111088	0.0190705
Ppan	119.491	178.837	0.58175	0.00111062	0.0190705
Nqo2	182.84	121.985	-0.583875	0.00111303	0.0190799
Rfwd2	595.784	438.612	-0.441843	0.00111333	0.0190799
Cntn2	1048.28	1389.93	0.406989	0.00111489	0.0190885
Stx1a	1255.54	1664.23	0.406547	0.00111573	0.0190885
Cd93	80.713	48.3721	-0.738626	0.00112012	0.0191037
Stub1	121.893	182.524	0.582476	0.00112044	0.0191037
Uqcrfs1	123.54	183.531	0.571047	0.00111928	0.0191037
Vezt	3075.85	2350.01	-0.388321	0.00111818	0.0191037
Sidt2	569.919	770.641	0.435302	0.00112838	0.0192228
Marcks	419.422	572.572	0.449057	0.00113083	0.0192481
Lrpap1	307.654	424.907	0.465838	0.00113807	0.019355
Pitpnm1	894.498	1194.53	0.417292	0.00114352	0.0194245
Sec61a2	1359.34	1027.43	-0.403857	0.0011441	0.0194245
Cfap74	294.095	207.778	-0.501242	0.00114745	0.019449
Wipf3	516.652	376.084	-0.458138	0.00114748	0.019449
Teddm2	42.1905	21.1872	-0.993729	0.00114901	0.0194584
Cox20	720.578	533.936	-0.432488	0.00115127	0.0194802
Pcdhgb5	185.063	125.467	-0.560702	0.00115341	0.0194922
Slc9a5	289.123	403.828	0.482058	0.00115393	0.0194922
Slc38a2	1947.15	2557.46	0.393345	0.00116074	0.0195908
8030462N17Rik	715.958	529.836	-0.43433	0.00116604	0.0196471
Pcsk2os1	268.673	188.601	-0.510511	0.00116589	0.0196471
Sorbs2	8188.3	6276.93	-0.383505	0.00117452	0.0197733
Sema7a	457.17	616.751	0.431957	0.00118731	0.0199719
Pcp4	163.764	235.265	0.522669	0.00119555	0.0200867
Ubap1l	47.6231	24.0622	-0.984893	0.00119614	0.0200867
Slc9a6	505.794	682.141	0.431521	0.00119906	0.0201189
Gmppa	248.095	346.84	0.48338	0.00120302	0.0201347
Kat2a	481.461	656.723	0.447865	0.00120287	0.0201347
Lonrf1	471.246	344.335	-0.452667	0.00120111	0.0201347
Cd46	281.959	200.475	-0.492061	0.00120536	0.020157
Arhgdia	168.769	244.353	0.533914	0.00121194	0.0202333
Ppp1r37	758.737	1014.71	0.4194	0.00121099	0.0202333
Slc25a11	133.674	198.618	0.571271	0.00121838	0.0203239
Daam2	264.21	369.435	0.483633	0.00122512	0.0204194
Aplp2	2669.06	3481.02	0.383179	0.00122621	0.0204205
Murc	75.2878	44.514	-0.758155	0.00122835	0.0204392
Gjb6	2.95856	13.1739	2.15472	0.00123019	0.0204528
C130026L21Rik	79.8639	47.4395	-0.751453	0.00123521	0.020505
Ssr3	347.594	476.833	0.456083	0.00123538	0.020505
Fars2	118.188	75.6546	-0.643587	0.0012367	0.02051
Sort1	1830.97	2400.76	0.390884	0.00124032	0.020553
Hexdc	297.282	411.089	0.467615	0.0012604	0.0208685
Apbb1	569.899	769.086	0.43244	0.00127275	0.0210459
Arnt	1213.1	910.954	-0.413251	0.00127532	0.0210459
Mrpl53	88.8019	136.49	0.620135	0.00127417	0.0210459
Tcp11l1	395.414	286.558	-0.464537	0.00127444	0.0210459
Ablim2	1067.84	806.807	-0.404405	0.00128416	0.0211744
Gde1	435.231	590.767	0.440807	0.00128695	0.0211855
Hmbs	102.113	155.34	0.605268	0.00128677	0.0211855
Smok4a	28.7463	12.533	-1.19764	0.00129391	0.0212827
Laptm4b	101.896	156.812	0.621936	0.0012988	0.0213455
Gm12238	172.924	118.037	-0.550904	0.00130087	0.0213621
Coq6	158.887	228.868	0.526512	0.00131158	0.0215203
Thnsl1	484.185	352.844	-0.456526	0.00131888	0.0216224
Gm15708	32.4363	14.8951	-1.12278	0.00132119	0.0216379
Kcnk9	522.517	388.189	-0.42872	0.00132199	0.0216379
Lrrn3	758.522	1007.76	0.40989	0.00134084	0.0219285
Ddx10	572.086	421.186	-0.441774	0.00134672	0.0219916
Tfrc	2027.97	2650.79	0.38639	0.0013469	0.0219916
Fgfr3	21.669	44.2519	1.03011	0.00135488	0.0221039
Ceacam2	67.2694	38.9103	-0.789798	0.00135677	0.0221168
Nrbp2	2442.57	3218.15	0.397832	0.00136447	0.0222062
Rps6ka4	129.704	192.579	0.570221	0.00136353	0.0222062
Polr2e	102.529	154.361	0.590273	0.0013661	0.0222147
Tmem50a	130.748	189.98	0.539054	0.00137942	0.022413
Rasl10a	139.324	204.171	0.551339	0.00138566	0.0224962
Srsf7	2433.94	3182.48	0.386861	0.00139052	0.0225567
Hapln1	5.19149	17.0864	1.71863	0.00139974	0.022688
AA413626	37.039	18.4527	-1.00521	0.00140375	0.0227102
Raph1	2250.54	1715.24	-0.391862	0.00140451	0.0227102
Unc13d	4.80164	16.3861	1.77087	0.00140347	0.0227102
Ndufb8	77.7126	121.712	0.647254	0.00141087	0.0227947
Cfl1	200.302	283.625	0.501805	0.00141477	0.0228393
Coch	506.288	682.914	0.431748	0.00141646	0.0228481
Slitrk3	854.193	1127.11	0.399993	0.00141941	0.0228773
Tpbg	69.9922	110.959	0.664763	0.00142641	0.0229717
Nptxr	46.434	79.016	0.766964	0.00142928	0.0229994
Gtpbp3	189.648	269.766	0.508388	0.00143342	0.0230474
Haghl	253.897	355.769	0.486699	0.0014386	0.0231123
Slc38a6	501.504	367.472	-0.448628	0.00144313	0.0231664
Aspa	258.646	356.7	0.463728	0.00144669	0.0231864
Phb2	149.076	217.081	0.542191	0.00144625	0.0231864
Sfpq	6515.35	5026.12	-0.374398	0.00145632	0.0233035
Tomm40l	171.385	244.696	0.513749	0.00145529	0.0233035
Tbc1d22bos	37.9551	18.3288	-1.05019	0.00146283	0.023389
Mir344	12.1847	3.27427	-1.89583	0.00147747	0.0236041
Actg1	141.192	204.616	0.535258	0.00148285	0.0236713
Myrip	805.611	608.81	-0.404091	0.00148755	0.0237273
Caskin2	18.0521	39.0597	1.11351	0.00149104	0.0237642
Dmd	6458.13	4951.81	-0.383162	0.0015049	0.0239659
Celsr2	1608.78	2112.27	0.392828	0.00151221	0.023987
Etv5	448.712	332.077	-0.434272	0.00150901	0.023987
Purb	1090.89	1434.76	0.395302	0.00151077	0.023987
Rsrp1	5779.65	7527.9	0.381264	0.00151156	0.023987
Uvrag	359.986	260.845	-0.464748	0.00151158	0.023987
Arhgap25	144.825	94.5301	-0.615463	0.00151352	0.0239889
Stk26	157.977	223.552	0.500894	0.00152915	0.0242174
Emc3	204.376	285.236	0.480929	0.00153715	0.0243164
Flrt2	1822.06	2359.96	0.373192	0.00153783	0.0243164
2210018M11Rik	1401.83	1068.19	-0.392135	0.00154655	0.0243966
Gba2	974.916	1285.76	0.399272	0.00154453	0.0243966
Pnck	190.892	271.671	0.509107	0.00154611	0.0243966
Bmp1	1327.52	1753.32	0.401353	0.00154821	0.0244035
Gabpb2	490.998	359.896	-0.448139	0.00155039	0.0244187
Afg3l1	253.522	178.327	-0.507583	0.00155962	0.0245156
Dab1	766.848	575.153	-0.414994	0.00155982	0.0245156
Smim4	80.985	49.77	-0.70238	0.00156144	0.0245156
Trim59	177.441	249.255	0.490282	0.00156125	0.0245156
B4galnt1	687.083	916.951	0.416361	0.00156718	0.0245672
Nrf1	171.889	117.326	-0.55096	0.00156625	0.0245672
Tacc2	481.861	354.308	-0.443613	0.00157014	0.0245944
Dnajb9	188.137	268.034	0.510632	0.00157213	0.0246064
9330162B11Rik	28.6762	12.3797	-1.21187	0.00157693	0.024652
Rab11fip4os1	112.186	70.903	-0.661976	0.00157751	0.024652
Dpm1	185.611	127.215	-0.545013	0.00158083	0.0246644
Emc1	682.804	903.679	0.404339	0.001582	0.0246644
Sgcb	770.911	1024.94	0.410909	0.00158136	0.0246644
Thada	771.358	575.862	-0.421678	0.00158464	0.0246863
9130011E15Rik	219.848	153.083	-0.522199	0.00159434	0.0248183
Eif2b5	235.194	331.237	0.494013	0.00159761	0.0248497
2610037D02Rik	36.7707	18.0577	-1.02594	0.00160645	0.0249292
Selk	145.224	208.339	0.520655	0.00160594	0.0249292
Sipa1l1	2585.71	1979.98	-0.385077	0.00160593	0.0249292
Ncoa6	1113.51	842.968	-0.401559	0.00161272	0.0250071
Tmc1	34.0956	16.0647	-1.08569	0.00161461	0.025017
Tshz2	149.606	98.0673	-0.609324	0.00161632	0.0250243
Gm10421	35.7384	17.3605	-1.04166	0.00161987	0.0250392
Mdh1	666.267	888.725	0.415636	0.00161875	0.0250392
Sharpin	280.79	387.284	0.463901	0.00162104	0.0250392
Utp14b	466.905	340.268	-0.456459	0.0016225	0.0250425
Stx16	934.792	705.167	-0.406682	0.00162453	0.0250545
Kdelr1	74.3273	115.694	0.638347	0.00163209	0.0251517
Chmp2a	204.395	284.685	0.478009	0.00163641	0.0251989
Mast3	1405.44	1845.08	0.392666	0.00164281	0.025241
Palm2	737.861	549.743	-0.424592	0.00164292	0.025241
Tfpi	51.0343	27.204	-0.907651	0.00164282	0.025241
Trerf1	868.079	651.081	-0.414989	0.00164419	0.0252412
Pkd2	757.731	567.747	-0.416437	0.00164752	0.0252644
Wash1	191.763	272.268	0.5057	0.00164823	0.0252644
AF357359	735.544	981.506	0.416186	0.00165349	0.0253063
Mcph1	286.551	203.407	-0.494427	0.0016528	0.0253063
Gabrd	318.699	434.841	0.448295	0.00167106	0.0255557
Coro1a	362.653	492.223	0.440724	0.0016728	0.0255591
Plxnb1	102.579	154.524	0.591094	0.00167383	0.0255591
Arsa	208.309	293.28	0.493553	0.00168752	0.0257484
Tlr3	2.06637	10.8413	2.39137	0.00168882	0.0257487
Gm10778	3.2956	13.5906	2.04399	0.00169723	0.0258573
Gale	98.8303	149.569	0.597787	0.0017019	0.0259086
Srrt	1138.48	1503	0.400732	0.00170647	0.0259586
Rbfox2	3212.16	2474.94	-0.376149	0.00171064	0.0260023
B3galnt1	228.664	319.431	0.482272	0.00171237	0.0260032
Slc25a3	1047.46	1383.96	0.401903	0.0017133	0.0260032
Rccd1	150.468	217.27	0.530036	0.00172541	0.0261672
Scn4b	277.188	375.315	0.437235	0.00172939	0.0262077
Yy2	143.031	94.7159	-0.59465	0.00173124	0.026216
Hsd3b3	22.2073	8.8044	-1.33474	0.00175259	0.0265192
Igsf8	685.115	909.142	0.40816	0.00176418	0.0266734
Me3	819.166	621.014	-0.399531	0.00176549	0.0266734
Tmem33	609.702	809.671	0.409231	0.00176677	0.0266734
Eml6	1007.75	762.836	-0.401699	0.00179143	0.0270174
Ggt7	574.535	764.371	0.411877	0.00179226	0.0270174
Enpp4	204.491	286.321	0.485598	0.00180558	0.0271774
Zfp827	778.506	585.19	-0.411803	0.00180485	0.0271774
Ncln	311.789	424.793	0.446191	0.00180734	0.0271833
Ddx39	210.452	293.593	0.480327	0.00181368	0.0272582
Met	59.2885	93.8988	0.663354	0.00181507	0.0272588
Jund	226.476	316.303	0.481946	0.00182615	0.0273841
Plxna3	427.047	577.549	0.435549	0.0018261	0.0273841
Cdan1	548.658	735.066	0.421968	0.00183536	0.0275016
Chd8	2584.09	3343	0.371487	0.00184212	0.0275823
Cdk16	677.51	898.153	0.40672	0.00185418	0.027742
Mcur1	264.95	189.606	-0.482714	0.00186352	0.0278403
Rxrb	145.819	210.286	0.528172	0.00186331	0.0278403
Camk2a	4100.15	3169.93	-0.371226	0.00187149	0.0279384
Dusp11	2462.93	1896.47	-0.377059	0.00188272	0.0280348
L3mbtl4	37.2191	18.2761	-1.02609	0.00188068	0.0280348
Mkl2	3744.2	2896	-0.370597	0.00188552	0.0280348
Pan2	467.679	627.484	0.424058	0.00188323	0.0280348
Psd	604.456	811.322	0.424636	0.00188634	0.0280348
Slc25a27	870.072	654.635	-0.410444	0.00188474	0.0280348
D3Ertd751e	347.835	252.045	-0.464723	0.00188873	0.0280495
Ppp1ca	125.185	182.818	0.546343	0.00189493	0.0281208
Hip1r	572.625	763.801	0.415606	0.00189695	0.0281299
Tasp1	303.75	218.361	-0.476168	0.00190028	0.0281585
Coasy	131.744	193.22	0.552509	0.00190741	0.0282431
Mphosph9	1578.1	1205.97	-0.387988	0.00190937	0.0282514
Sgk1	667.506	883.483	0.40442	0.00191257	0.0282777
Gtpbp2	463.995	630.27	0.441862	0.00191735	0.0283067
Slc24a1	79.5572	48.8867	-0.70255	0.00191603	0.0283067
Adcy10	83.6241	51.7662	-0.691909	0.00192034	0.0283172
Il33	115.977	172.231	0.570512	0.00192371	0.0283172
Tceb2	31.8189	56.498	0.828317	0.00192311	0.0283172
Upf3a	177.275	122.829	-0.529334	0.00192119	0.0283172
B230216N24Rik	201.252	138.496	-0.539162	0.00193249	0.0284255
4930482G09Rik	20.82	7.74616	-1.42642	0.0019386	0.0284872
Cpeb3	870.877	659.272	-0.401596	0.00194017	0.0284872
Dclk1	9270.35	7168.48	-0.370956	0.00194095	0.0284872
Ccdc25	211.829	148.997	-0.507618	0.0019465	0.0285477
C1ql3	266.499	364.646	0.452367	0.00195311	0.0286028
Gstp1	58.484	96.2867	0.719295	0.00195203	0.0286028
Mrpl36	52.2258	86.7745	0.73251	0.00196229	0.0287163
4933417G07Rik	53.7033	28.8037	-0.898755	0.00197218	0.0288219
M6pr	228.305	314.808	0.463511	0.00197239	0.0288219
Rps9	65.6855	102.165	0.637258	0.00198469	0.0289805
Thoc1	1332.32	1740.26	0.385368	0.00199704	0.0291396
Nasp	365.663	267.405	-0.451492	0.0019997	0.0291572
Epha4	2592.36	3329.58	0.361074	0.00200309	0.0291611
Fam213b	47.2276	78.0806	0.725333	0.00200332	0.0291611
Zfp746	293.838	208.283	-0.496476	0.00200434	0.0291611
Il5	12.1911	3.11963	-1.96638	0.00201621	0.0293126
Stk16	200.25	281.851	0.493131	0.00202395	0.0294038
Zfp692	601.622	799.271	0.409828	0.00203124	0.0294884
Zmym3	1349.58	1761.59	0.384366	0.00203672	0.0295464
Sgpp1	126.616	182.556	0.527887	0.00204524	0.0296477
Zfp811	156.05	106.282	-0.554117	0.00204666	0.0296477
9530068E07Rik	207.685	288.034	0.471841	0.00205192	0.0296809
Kbtbd7	187.743	264.117	0.492422	0.00205131	0.0296809
Rcvrn	27.2218	11.7371	-1.21369	0.0020534	0.029681
Igfbp5	280.159	381.393	0.445035	0.002063	0.0297983
Myrf	183.94	260.225	0.500523	0.00206451	0.0297986
Mib2	817.377	1074.91	0.395137	0.00207103	0.0298712
Agk	177.752	123.525	-0.525063	0.0020763	0.0299154
Sdc4	1.02516	8.40519	3.03544	0.00207709	0.0299154
Med24	784.59	1030.32	0.393078	0.00208129	0.0299439
Tbce	1405.1	1835.44	0.385455	0.00208205	0.0299439
Jmjd8	154.706	222.836	0.526457	0.0020851	0.0299662
Scamp5	540.106	718.803	0.412352	0.00208932	0.0300053
Ndufs2	368.502	498.3	0.435344	0.00210464	0.0302037
4930488L21Rik	232.87	163.293	-0.51206	0.00212294	0.0304446
Lekr1	361.721	265.925	-0.443857	0.00212531	0.0304543
Spopl	430.354	316.234	-0.444531	0.00212666	0.0304543
Atp5b	656.554	866.352	0.40004	0.00214811	0.0307395
Pclo	11857.2	9219.39	-0.363016	0.00217214	0.0310612
Rere	1702.47	1315.51	-0.37201	0.00217547	0.0310866
Stk11ip	269.458	372.061	0.465477	0.00218242	0.0311637
Tmem179b	73.736	113.723	0.625082	0.00220171	0.0314167
Cntn5	515.763	383.17	-0.428725	0.00220828	0.0314504
Gm16982	100.714	65.2111	-0.627075	0.00220602	0.0314504
Rgs8	351.699	252.772	-0.476505	0.00221035	0.0314504
Smarcc2	1820.54	2361.6	0.375399	0.00220971	0.0314504
Tyw3	118.59	76.8863	-0.625188	0.00221241	0.0314574
Itgav	1090.3	1416.86	0.377963	0.00221923	0.0315319
Gpr37l1	7.12538	19.9669	1.48657	0.00222482	0.031589
Usp13	419.607	307	-0.450802	0.00223102	0.0316546
Spock2	1178.45	1529.84	0.376499	0.00223476	0.0316852
Cd151	117.439	173.641	0.564195	0.00224581	0.0318193
Clasrp	1066.84	1397.33	0.389328	0.00225539	0.031906
Ephb6	1153.68	1505.34	0.383845	0.00225671	0.031906
Khdrbs2	300.181	214.465	-0.485092	0.00225631	0.031906
Rplp1	38.5718	66.247	0.780309	0.00225975	0.0319265
Mir181b-2	14.2655	4.48533	-1.66924	0.00226334	0.0319547
Magee1	297.133	404.237	0.444089	0.00227054	0.0320338
Il13	3.78013	0	#NAME?	0.00227685	0.0321002
Snord37	16.6498	35.7678	1.10316	0.00228635	0.0322115
Fbxo9	218.496	299.565	0.45526	0.00229598	0.0323245
Rftn2	11.2237	27.158	1.27483	0.00229769	0.0323257
Tnik	5090.27	3956.06	-0.363677	0.0023001	0.032337
Plekha5	2900.63	2247.55	-0.368013	0.00230586	0.0323952
Hnrnpm	1506.26	1160.93	-0.375691	0.00231794	0.0325079
Ier2	23.2938	45.1511	0.954814	0.00231875	0.0325079
Mirlet7a-1	107.402	70.6537	-0.604179	0.00231753	0.0325079
Ppp1r15b	288.952	397.533	0.460242	0.0023206	0.0325111
Tram1l1	138.175	198.48	0.5225	0.00232292	0.0325208
Basp1	387.507	518.995	0.4215	0.00232552	0.0325345
Slc7a4	365.728	493.077	0.431042	0.00233633	0.032663
Impg2	61.2691	35.0351	-0.80636	0.00234446	0.0327538
B130024G19Rik	28.2421	12.5876	-1.16584	0.00235436	0.0328234
Rnf11	246.438	338.532	0.458068	0.00235296	0.0328234
Sec62	784.201	1027.43	0.389749	0.002354	0.0328234
Rbbp6	1918.99	1481.76	-0.373034	0.00236534	0.0329536
B3galt1	348.164	466.817	0.42309	0.00237097	0.033009
Hivep2	3775.35	2928.11	-0.36664	0.00237303	0.0330148
Pparg	179.722	124.467	-0.530003	0.00238138	0.033108
Ddi2	240.575	170.986	-0.492611	0.00240977	0.0334585
Plscr3	133.673	191.61	0.519464	0.00240994	0.0334585
Pnrc1	188.894	262.832	0.476559	0.00242428	0.0336344
Pcdhgb6	192.462	136.423	-0.496487	0.0024335	0.033739
Parp2	221.171	306.324	0.469897	0.00243678	0.033761
N4bp2l1	341.822	249.91	-0.451839	0.00243911	0.0337652
Nexn	269.628	193.652	-0.477504	0.00244045	0.0337652
Ifit1bl2	36.6788	18.1899	-1.01181	0.00245357	0.0339233
Rapgef6	1694.81	1309.57	-0.372026	0.00246145	0.0340088
Nr6a1	371.487	270.6	-0.45715	0.00247114	0.0340956
Sez6l2	714.791	939.158	0.393847	0.00246963	0.0340956
Eif4e3	281.366	202.055	-0.477699	0.00247421	0.0341145
Gm19557	48.8555	26.249	-0.896258	0.0025035	0.0344945
Chn1os3	323.972	235.746	-0.458637	0.00250731	0.0344996
Safb2	1099.55	845.917	-0.378322	0.00250705	0.0344996
Styx	151.509	103.499	-0.549785	0.00251616	0.0345768
Ubc	142.908	203.213	0.507909	0.00251637	0.0345768
Sema3e	304.613	407.981	0.421527	0.00252352	0.0346513
Gltscr2	176.031	247.103	0.489288	0.00252529	0.0346519
Ubqln2	259.893	353.334	0.443115	0.00253238	0.0347253
Mtpn	484.575	638.439	0.397828	0.00253935	0.0347971
Ring1	323.939	439.105	0.438844	0.00254122	0.0347989
Exosc8	196.991	274.341	0.477843	0.00256028	0.0350236
Mmgt1	142.532	203.211	0.511693	0.00256112	0.0350236
Pom121	1135.31	1474.82	0.37745	0.00256878	0.0351043
Dync1h1	7828.43	9959.45	0.347344	0.00257143	0.0351075
Rpa3	104.572	154.165	0.559983	0.00257251	0.0351075
Ankrd61	66.843	39.7363	-0.750318	0.00257469	0.0351132
Fastk	434.032	577.778	0.412717	0.00258982	0.0352641
Nipal3	245.957	335.936	0.449781	0.00259104	0.0352641
Wipf2	415.626	308.883	-0.428226	0.00258982	0.0352641
Cluap1	412.643	306.506	-0.428979	0.00259572	0.0353039
1700007F19Rik	96.4316	60.8872	-0.663368	0.00259983	0.0353358
Slc5a12	151.077	104.936	-0.52578	0.00261084	0.0354614
Cyp2j9	6.45466	18.9739	1.5556	0.00263328	0.0357178
Tmem151a	691.221	900.853	0.382146	0.00263233	0.0357178
Vldlr	1267.18	1634.83	0.367521	0.00264453	0.035846
Lgalsl	315.117	422.594	0.423383	0.00264892	0.0358571
Narfl	187.649	262.316	0.48327	0.00264765	0.0358571
Etl4	1234.43	950.784	-0.376656	0.00266022	0.0359614
Mtx3	904.919	692.308	-0.386374	0.00265883	0.0359614
Gse1	478.786	361.86	-0.403947	0.00266927	0.0360594
Ablim1	1634.4	1262.51	-0.372457	0.00267195	0.0360713
Fus	1243.43	958.457	-0.375539	0.00268291	0.0361877
Msrb3	120.947	80.5514	-0.586397	0.00268418	0.0361877
Srbd1	252.954	181.968	-0.475195	0.002686	0.0361878
Nbeal2	207.503	287.98	0.472836	0.00269383	0.0362446
Scyl1	315.723	427.839	0.438406	0.002693	0.0362446
Myo1c	193.349	266.899	0.465089	0.0026963	0.0362535
Megf11	419.738	314.198	-0.417816	0.00271981	0.036545
Nsun7	252.817	180.001	-0.490087	0.00272369	0.0365727
Cplx1	182.769	254.023	0.474939	0.00272669	0.0365885
Grip1	242.72	173.218	-0.486701	0.0027461	0.0367749
Hid1	491.139	653.088	0.411144	0.00274561	0.0367749
Pla2g4d	8.75664	1.86147	-2.23394	0.00274315	0.0367749
Aak1	7179.83	5613.36	-0.355085	0.00276049	0.0369292
Nudt17	56.7136	90.3579	0.671955	0.0027613	0.0369292
Gdf10	0	4.8418	Inf	0.00278822	0.0372495
Trmt2a	327.833	441.969	0.430985	0.00278897	0.0372495
Ttll11	271.159	198.201	-0.452173	0.00279576	0.0373153
Notch3	65.3646	38.995	-0.745221	0.00279985	0.037345
Mt3	67.3784	105.08	0.641135	0.00280403	0.0373759
C7	93.8172	58.8171	-0.673618	0.00280643	0.037383
Lrrc75a	87.3836	128.964	0.561536	0.00281666	0.0374944
Lpar1	52.0265	83.1893	0.677152	0.00282363	0.0375621
Cox5b	82.8108	126.636	0.612801	0.00283729	0.0377189
Gstm5	46.0998	75.63	0.714199	0.00284248	0.0377628
Slc50a1	395.533	530.773	0.424296	0.00285528	0.0379077
Zfp955a	299.35	215.767	-0.472358	0.00285734	0.0379098
Adam1b	42.4211	22.8534	-0.892374	0.00286445	0.0379403
Arl2bp	416.402	553.844	0.411505	0.00286531	0.0379403
Pla2g7	11.8613	27.1906	1.19684	0.00286398	0.0379403
Nifk	75.7445	115.22	0.605172	0.00287468	0.0380392
0610043K17Rik	86.1514	53.9324	-0.675721	0.00288224	0.038114
Dag1	599.25	785.571	0.390583	0.00289022	0.0381943
Snord8	198.776	139.898	-0.506768	0.0029	0.0382983
Rpsa	72.4368	111.318	0.619889	0.00290232	0.0383038
Eya3	485.364	358.724	-0.436194	0.00290703	0.0383407
Ssbp4	408.116	547.437	0.423714	0.00291453	0.0384143
Eqtn	76.8348	46.9796	-0.709727	0.00292853	0.0385734
Hepacam	77.276	118.739	0.619703	0.00293223	0.0385967
Tmem164	125.036	83.5158	-0.582219	0.00294383	0.0387241
Gm2011	134.57	90.9259	-0.565599	0.00295889	0.0388534
Rian	18248.3	23280.8	0.351378	0.00295948	0.0388534
Slc9a9	682.332	520.999	-0.389193	0.00295849	0.0388534
4921511C10Rik	84.879	52.2832	-0.699059	0.00296862	0.0389274
Chst11	90.9287	135.232	0.57263	0.00297416	0.0389274
Erbb2ip	1065.02	1370.44	0.363756	0.00297484	0.0389274
Hsd3b1	15.0607	5.13271	-1.553	0.00297317	0.0389274
Podxl2	210.877	294.479	0.481761	0.00297084	0.0389274
Tcea2	752.477	989.123	0.394501	0.00300373	0.0392799
Acsl4	880.105	1137.02	0.369507	0.00301757	0.0393325
Mirlet7e	32.7668	16.128	-1.02267	0.00301636	0.0393325
Rpl24	63.9982	99.3116	0.633931	0.00301277	0.0393325
Scd1	98.4413	145.348	0.562174	0.00301412	0.0393325
Vma21	172.355	242.361	0.491773	0.00301155	0.0393325
Timp4	166.879	116.445	-0.519157	0.00302758	0.0394373
Itgbl1	131.788	87.5737	-0.589646	0.00306145	0.0398525
Btbd3	507.911	669.375	0.398241	0.00306788	0.0398844
Sdk1	179.181	124.036	-0.530661	0.00306592	0.0398844
Ldlrad4	422.448	316.034	-0.418692	0.00309295	0.0401843
Cspg5	506.001	665.34	0.394952	0.00309934	0.0402152
Hgh1	82.2694	124.584	0.598688	0.00309852	0.0402152
Alg11	314.689	420.071	0.416709	0.00310138	0.0402156
Ahdc1	369.508	273.791	-0.43253	0.00310594	0.0402487
Tspan31	203.65	281.5	0.467047	0.00311214	0.0403029
Zfp612	1011.41	781.102	-0.372786	0.0031249	0.040442
Cmtm5	26.8755	48.8895	0.863232	0.00313147	0.0405008
Wbp5	93.3624	139.558	0.579947	0.00313971	0.0405812
Sclt1	954.461	730.754	-0.3853	0.00315012	0.0406896
Ankrd13b	665.777	877.156	0.397795	0.00315427	0.0407169
Rab2b	183.63	128.977	-0.50969	0.00319285	0.0411883
Cisd1	52.0654	83.3533	0.678914	0.00319713	0.041217
Dctn2	560.58	736.538	0.39384	0.00320594	0.041304
LOC432842	399.241	299.847	-0.413035	0.0032203	0.0414624
Chdh	112.676	74.3395	-0.599974	0.00322264	0.0414658
Lypla2	153.617	217.819	0.503792	0.00322751	0.0415019
Htr2c	142.48	198.318	0.477054	0.0032355	0.0415779
Cluh	679.483	888.41	0.386788	0.00324382	0.0416302
Csnk1g1	1049.69	804.463	-0.383862	0.00324221	0.0416302
Gphn	718.685	547.195	-0.393304	0.0032458	0.0416302
Rab26	453.866	601.964	0.407411	0.00325315	0.0416978
Arl6ip1	330.94	441.754	0.416676	0.00327854	0.0419963
Muc5b	49.6444	27.154	-0.870467	0.00328106	0.0420018
Klhdc7a	0	4.61578	Inf	0.00328581	0.0420357
Morn1	112.807	74.7387	-0.593929	0.00329604	0.0421396
Cacybp	232.258	316.828	0.447972	0.00330494	0.0421731
Focad	1554.88	1203.92	-0.369068	0.00330497	0.0421731
Gm5464	94.9035	60.8884	-0.640294	0.00330196	0.0421731
Ccndbp1	172.042	239.409	0.476719	0.00331739	0.0422896
Mta3	473.29	355.394	-0.413307	0.00331937	0.0422896
Polr3k	267.021	194.132	-0.459913	0.00332043	0.0422896
Ldoc1l	92.8098	138.409	0.576593	0.00332523	0.0423238
Efcab5	123.685	83.8062	-0.561538	0.00333012	0.0423409
Zmat2	217.691	296.428	0.445404	0.0033322	0.0423409
Zmiz1	641.333	489.434	-0.389958	0.00333291	0.0423409
Akap17b	636.926	484.912	-0.393404	0.00335375	0.0425541
Rbm41	348.992	258.362	-0.433801	0.00335395	0.0425541
Polg	529.27	698.748	0.400768	0.00338844	0.0429103
Sap130	517.527	388.991	-0.4119	0.00338433	0.0429103
Tmem60	79.0009	117.919	0.577861	0.00338631	0.0429103
Dnmt3a	1761.21	1372.16	-0.360114	0.00339207	0.042929
1700110C19Rik	46.3356	25.1285	-0.8828	0.00339751	0.0429708
Gtf2h4	84.6221	125.371	0.567097	0.00340982	0.0430992
Smyd3	225.681	163.677	-0.463429	0.00341381	0.0431226
Pcgf1	111.171	161.674	0.540303	0.00342149	0.0431923
Sh3tc2	24.5489	46.1631	0.911085	0.00342722	0.0432373
Sod2	584.371	442.475	-0.401288	0.00345479	0.0435578
Commd10	135.158	91.2582	-0.566621	0.00345947	0.0435893
Ralgapa2	1877.88	1460.89	-0.362264	0.00346478	0.0436288
Cnpy2	47.1318	75.947	0.688292	0.00346971	0.043636
Mrps17	236.835	324.394	0.453865	0.00346898	0.043636
Tcf20	1123.01	864.254	-0.377838	0.00348885	0.0438492
Cnot2	689.649	520.373	-0.406317	0.00349202	0.0438615
D5Ertd579e	1126.02	868.755	-0.374213	0.00350148	0.0439209
Mcrs1	107.814	157.865	0.550138	0.00350332	0.0439209
Wdr74	106.633	154.299	0.533074	0.0035018	0.0439209
Scaper	1087.25	840.041	-0.372155	0.00351409	0.0440283
Sema3f	139.101	197.354	0.504653	0.00351713	0.0440389
Nol4	967.423	743.092	-0.380607	0.00356298	0.0445851
Cdk8	445.367	335.935	-0.406813	0.00357518	0.0447098
Syt5	295.618	398.551	0.431029	0.00358262	0.044775
Ate1	697.188	531.626	-0.391135	0.00358684	0.0447891
Ubtf	747.829	971.257	0.377144	0.00358822	0.0447891
Dhcr24	353.2	467.455	0.40434	0.00360053	0.0449147
Abhd13	367.216	485.664	0.403329	0.00361298	0.0450419
D030068K23Rik	65.0265	38.7458	-0.746988	0.00361525	0.0450423
Slc27a4	280.786	375.421	0.419037	0.00361806	0.0450492
Ccnl2	1384.55	1769.75	0.354131	0.00362709	0.0451336
Qpct	31.1548	55.133	0.823462	0.00363049	0.0451478
AI413582	90.6272	135.551	0.58082	0.0036393	0.045217
Hsd3b6	11.2043	3.03136	-1.88601	0.00364056	0.045217
Pcdhga9	198.625	141.605	-0.48818	0.00367132	0.0455544
Ubap2l	1073.25	835.214	-0.361765	0.00367228	0.0455544
Srcap	2038.19	1599.37	-0.349789	0.00369381	0.0457931
Os9	510.089	671.069	0.39571	0.00370129	0.0458576
Psme1	44.1922	72.7273	0.718707	0.0037165	0.0460175
Bptf	2485.13	1946.63	-0.35234	0.00373068	0.046111
Crebrf	1069.57	828.169	-0.369027	0.00373326	0.046111
Sox5os3	11.3142	3.04187	-1.89511	0.00373177	0.046111
Unc79	2745.16	2155.49	-0.348873	0.0037269	0.046111
Olfm1	2142.58	2727.73	0.348348	0.00374592	0.0462389
Cadps	4404.93	3465.39	-0.346102	0.00375258	0.0462577
Msra	216.338	154.215	-0.488348	0.00375437	0.0462577
Opalin	65.0881	97.6097	0.58463	0.00375052	0.0462577
Fbll1	40.8017	68.702	0.751724	0.00376357	0.0463426
Tm9sf3	756.459	980.013	0.373539	0.00376725	0.0463594
Cdkl3	153.234	106.133	-0.529862	0.0037704	0.0463697
Rabac1	63.6207	98.4753	0.630267	0.00379429	0.0466348
Pim3	101.494	149.072	0.55462	0.00380987	0.0467976
Dmap1	131.307	186.228	0.504127	0.00382103	0.0468093
Fhitos	6.10387	0.688551	-3.14809	0.00381924	0.0468093
Ntsr2	33.057	56.5573	0.774758	0.00382484	0.0468093
Rabgap1	1820.4	1413.77	-0.364705	0.00382013	0.0468093
Rps15	110.229	157.821	0.517787	0.00381999	0.0468093
Rrp9	112.651	162.945	0.532525	0.00382473	0.0468093
Smpdl3a	55.0886	87.4345	0.666448	0.00382746	0.0468128
Rnf38	1354.87	1057.2	-0.357915	0.00384409	0.0469875
Fer	643.101	490.577	-0.390566	0.00386198	0.0471774
Aatf	147.023	100.769	-0.544993	0.00387265	0.0472703
Araf	469.861	618.459	0.396445	0.00387431	0.0472703
Eif5a	134.251	189.824	0.499733	0.00389528	0.0474972
4933428C19Rik	12.8262	3.77093	-1.76611	0.00390188	0.0475489
Caly	253.866	342.891	0.433683	0.00391266	0.0476222
Celf1	3100.39	2428.82	-0.352191	0.00391107	0.0476222
Caln1	218.416	156.053	-0.48504	0.00393236	0.047775
Caml	295.103	396.041	0.424431	0.00393013	0.047775
Gm15408	55.6509	31.9103	-0.802385	0.00393062	0.047775
Tmem127	292.38	391.198	0.420053	0.00393719	0.0477757
Zmat1	487.814	370.714	-0.396024	0.00393641	0.0477757
4932438A13Rik	7533.95	9486.24	0.33243	0.00394753	0.0477902
A930012L18Rik	67.951	41.0293	-0.727841	0.00394692	0.0477902
Arhgap10	380.165	284.441	-0.418494	0.00394793	0.0477902
Msrb2	71.5827	44.6194	-0.68194	0.00394535	0.0477902
Tnk2os	41.746	22.2964	-0.904827	0.00397552	0.0480951
4932441J04Rik	18.8858	7.54186	-1.32431	0.0039852	0.0481831
Klf6	617.782	800.714	0.37419	0.00400059	0.0483401
Pde7b	283.271	207.241	-0.45087	0.00400488	0.0483628
Kmt2a	10237.9	12888.7	0.332191	0.00404085	0.0487598
Ube2k	687.61	529.008	-0.3783	0.00404263	0.0487598
Cuedc2	169.627	234.252	0.465691	0.00405375	0.0488352
Mamld1	370.068	274.774	-0.429548	0.00405259	0.0488352
5730422E09Rik	56.6838	31.997	-0.825	0.00405775	0.048854
Chst12	43.1399	71.1345	0.721528	0.00406541	0.0489168
Tomm20	477.767	622.545	0.381872	0.00407642	0.0490198
Ap3s2	238.039	174.31	-0.449543	0.00409437	0.0491876
Svopl	24.6482	11.2267	-1.13454	0.00409529	0.0491876
Uqcrq	44.2683	70.7759	0.676985	0.00411165	0.0493546
1810026B05Rik	1325.32	1031.26	-0.361926	0.00412503	0.0494855
Ints1	1126.52	1455.79	0.369931	0.0041311	0.0495287
Atp5d	151.406	210.201	0.473348	0.00414845	0.049707
Atxn7l1	423.009	318.578	-0.409042	0.00415953	0.0498099

## Sheet: upregulated1.5Fold
id	baseMeanA	baseMeanB	log2FoldChange	pval	padj
Slc1a3	47.1562	134.94	1.5168	1.31376e-12	7.11349e-10
Prnp	700.507	1292.83	0.884064	2.92477e-12	1.46487e-09
Mal	180.145	376.099	1.06196	4.05865e-12	1.9245e-09
Atp1a2	143.71	306.526	1.09285	5.6085e-12	2.34085e-09
Tspan7	739.328	1351.18	0.869934	6.80884e-12	2.72817e-09
Sparcl1	1041.15	1864.24	0.840415	9.42777e-12	3.70345e-09
Reep5	433.846	804.456	0.890831	2.01041e-11	7.74551e-09
Apoe	78.8872	187.841	1.25165	2.28069e-11	8.62102e-09
Ptgds	187.194	377.757	1.01292	4.73244e-11	1.66333e-08
Serinc1	2371.42	4082.38	0.78366	5.14036e-11	1.77555e-08
Thy1	731.941	1310.41	0.840217	5.38774e-11	1.79897e-08
Gja1	14.6129	61.7135	2.07834	6.05281e-11	1.95584e-08
Tmem30a	1684.94	2896.13	0.78143	7.71229e-11	2.34103e-08
Ctsb	564.892	1010.61	0.839186	9.24959e-11	2.76576e-08
Tmed7	415.528	753.185	0.858058	1.67453e-10	4.65939e-08
Aplp1	1491.81	2551.99	0.774559	1.75203e-10	4.80824e-08
Pdia3	542.713	954.503	0.814562	5.42317e-10	1.34133e-07
Psap	1621.92	2722.55	0.747254	6.34048e-10	1.54909e-07
Cpe	1475.62	2471.35	0.743974	6.49807e-10	1.56846e-07
Tmem132a	591.53	1026.33	0.794978	9.24304e-10	2.1532e-07
B4gat1	244.509	455.493	0.897542	1.04059e-09	2.39624e-07
Atp1b1	3175.52	5220.62	0.71723	1.54451e-09	3.36334e-07
Itm2b	1073.27	1786.65	0.735249	1.99028e-09	4.24183e-07
Itm2c	550.472	935.55	0.765146	2.48871e-09	5.03625e-07
Serpini1	731.102	1235.94	0.757467	2.56403e-09	5.13677e-07
Hspa5	701.539	1185.64	0.757075	2.85488e-09	5.60733e-07
Clstn1	3080.23	5003.76	0.699976	3.0944e-09	6.01876e-07
Gpr37	154.456	298.791	0.951939	3.32849e-09	6.41182e-07
S1pr1	7.53333	38.9602	2.37064	3.77491e-09	7.13459e-07
Timp2	256.829	460.289	0.841732	5.37897e-09	9.88645e-07
Calr	630.268	1057.76	0.746968	5.69766e-09	1.02835e-06
Tspan3	364.528	632.356	0.794709	5.91926e-09	1.05881e-06
Cldn11	186.154	343.359	0.883224	8.45754e-09	1.47338e-06
Plp1	3983.56	6372.95	0.6779	8.68491e-09	1.49994e-06
Cst3	112.312	226.75	1.01359	1.13522e-08	1.91117e-06
Eef2	904.892	1484.02	0.713697	1.23569e-08	2.04594e-06
Gabra1	2800.33	4463.13	0.672457	1.43501e-08	2.31847e-06
Idh3g	828.247	1372.72	0.728907	1.49309e-08	2.393e-06
App	3882.88	6126.72	0.657989	1.77754e-08	2.77184e-06
Clu	227.814	405.2	0.830778	1.7848e-08	2.77184e-06
Gpm6a	2769.62	4392.8	0.665453	1.8852e-08	2.90524e-06
Impad1	441.124	737.252	0.740975	2.08086e-08	3.15818e-06
Atp6ap2	521.118	869.141	0.73798	2.09676e-08	3.15838e-06
Ckb	1190.36	1915.94	0.686653	2.90518e-08	4.18723e-06
Nceh1	467.128	777.45	0.734933	3.49843e-08	4.90123e-06
Penk	181.073	323.261	0.836129	5.26256e-08	7.07585e-06
Dus3l	637.796	1039.64	0.704916	6.64643e-08	8.6464e-06
Slc22a17	1435	2278.95	0.667311	7.01142e-08	9.00428e-06
Pgrmc1	316.668	532.51	0.74984	7.3636e-08	9.39633e-06
Synpr	110.461	212.175	0.941723	8.43804e-08	1.06319e-05
Dkk3	689.78	1097.89	0.670526	9.05174e-08	1.13339e-05
Dalrd3	591.487	969.526	0.712933	9.11584e-08	1.13433e-05
Ppap2b	31.7645	79.6295	1.32589	1.00081e-07	1.23107e-05
Kpnb1	2026.73	3152.72	0.637448	1.04977e-07	1.28238e-05
Edil3	990.384	1556.76	0.652491	1.19538e-07	1.42549e-05
Fam50a	256.369	437.112	0.769781	1.44849e-07	1.68716e-05
Canx	1367.68	2131.79	0.640336	1.48711e-07	1.71319e-05
Rce1	103.97	200.105	0.944593	1.57487e-07	1.80291e-05
Hdac3	791.274	1257.04	0.667783	1.67441e-07	1.88715e-05
Syt11	1603.95	2489.43	0.634188	1.67671e-07	1.88715e-05
Tbl3	153.795	277.465	0.851297	1.92068e-07	2.14966e-05
Atp6ap1	550.535	882.65	0.681006	2.09075e-07	2.32701e-05
Lrp11	508.062	813.239	0.678675	2.48347e-07	2.69489e-05
Olfm3	320.018	524.683	0.713296	2.54439e-07	2.74056e-05
Itfg1	886.207	1385.85	0.64506	2.7952e-07	2.97867e-05
Arhgef25	1115.38	1743.86	0.644743	2.82109e-07	2.99036e-05
Pcyox1	297.154	492.164	0.72793	3.01864e-07	3.14976e-05
Saraf	384.601	625.889	0.702546	3.16695e-07	3.28739e-05
Cck	460.191	741.299	0.687821	3.27925e-07	3.36905e-05
Fth1	420.734	682.254	0.697398	3.41784e-07	3.47578e-05
Skiv2l	471.132	760.921	0.691617	3.60596e-07	3.63024e-05
Sst	22.2293	61.7838	1.47476	3.68203e-07	3.68829e-05
Clcn2	810.332	1269.85	0.648074	4.12228e-07	4.06826e-05
Smpd1	209.289	355.702	0.765172	5.2234e-07	5.12968e-05
Rpl12	124.806	226.902	0.862382	6.15044e-07	5.94641e-05
Scd2	1921.56	2901.37	0.594454	6.32442e-07	6.0049e-05
Dennd6b	1310.85	2013.16	0.618959	6.49877e-07	6.14134e-05
Elovl4	240.997	405.046	0.749067	6.64831e-07	6.25316e-05
Abhd16a	353.032	573.118	0.699035	6.92313e-07	6.47821e-05
Pcsk1n	108.462	199.726	0.880827	7.55739e-07	6.94517e-05
Clptm1	374.239	603.982	0.690547	7.7081e-07	7.03664e-05
Scg2	374.661	600.508	0.680597	7.72716e-07	7.03664e-05
Tecr	774.733	1199.75	0.630963	8.60701e-07	7.73242e-05
Abca7	348.01	562.926	0.693814	9.16161e-07	8.12141e-05
Aup1	462.43	733.227	0.665024	9.44274e-07	8.33374e-05
Endod1	196.539	331.02	0.752103	9.65741e-07	8.48581e-05
Camkv	2112.4	3186.68	0.593169	9.77113e-07	8.54824e-05
Rtn1	1477.4	2233.56	0.596284	9.93551e-07	8.65426e-05
Scap	558.598	872.448	0.643259	1.33346e-06	0.000113198
Ctsd	266.394	432.967	0.700693	1.36892e-06	0.000115717
Cpsf1	750.25	1153.98	0.621177	1.39578e-06	0.000117414
Gcdh	265.628	432.607	0.70365	1.51624e-06	0.000126159
Syp	817.474	1241.81	0.603203	1.51764e-06	0.000126159
Glrb	1074.99	1616.3	0.58837	1.65894e-06	0.00013621
Fcho1	1542.07	2320.3	0.589443	1.68125e-06	0.000137412
Rhot2	538.055	833.944	0.632197	1.6873e-06	0.000137412
Cpne7	336.936	543.404	0.68955	1.89447e-06	0.00015304
Aqp4	11.2682	38.9462	1.78922	2.01935e-06	0.000160538
2020-09-15	160.059	269.204	0.7501	2.34949e-06	0.000180337
Eef1a1	514.301	793.372	0.625383	2.42717e-06	0.000183494
Rabggta	337.244	534.055	0.663196	2.54854e-06	0.000190347
Fasn	627.003	958.907	0.612918	2.76963e-06	0.000205506
Cd81	291.197	468.466	0.685947	2.95527e-06	0.000218472
Spock3	400.158	621.291	0.634699	2.97027e-06	0.000218774
Extl2	284.895	449.792	0.658826	3.36433e-06	0.000240298
Maf1	188.21	309.665	0.718364	3.35264e-06	0.000240298
Sema5a	376.286	587.193	0.642006	3.6552e-06	0.000255151
Maged2	60.3066	118.591	0.975608	3.89304e-06	0.000269873
Aldoa	698.141	1055.28	0.596031	4.23261e-06	0.000291396
Cdk5	527.103	804.333	0.609707	4.43831e-06	0.000302053
Qars	308.676	485.262	0.652669	4.91559e-06	0.000325013
Nprl2	284.735	450.107	0.660647	5.09933e-06	0.000333856
Ctsa	314.612	492.368	0.646163	5.19472e-06	0.000338576
Map4k2	852.155	1275.06	0.581372	5.20522e-06	0.000338576
Hyou1	400.811	614.826	0.617258	5.47643e-06	0.000353919
Mag	400.947	616.316	0.620257	5.61865e-06	0.00035963
Mfge8	4.94884	24.2479	2.2927	5.60324e-06	0.00035963
Ptov1	277.213	442.193	0.673679	5.6578e-06	0.000360982
Lamp5	483.485	738.705	0.611528	6.00224e-06	0.000379334
Cdipt	194.157	315.249	0.699267	6.21032e-06	0.000390024
Wdr90	398.03	615.277	0.628359	6.30728e-06	0.000393645
Snx32	730.88	1097.94	0.587098	6.52667e-06	0.000403566
Map1lc3a	52.3218	104.876	1.0032	6.99132e-06	0.00042833
Manea	325.945	500.94	0.620012	7.13506e-06	0.000435804
Gpr85	277.631	434.578	0.646447	7.25767e-06	0.000440606
Tmem35	58.8815	113.27	0.943884	7.55998e-06	0.000457573
Galt	593.978	895.764	0.59271	7.70391e-06	0.00046488
Eme2	167.17	274.01	0.712917	8.45043e-06	0.000506874
Fndc4	329.826	514.139	0.640452	8.60551e-06	0.000510067
Rhbdl1	436.198	669.666	0.618456	8.66276e-06	0.000511946
Lamp1	369.799	562.669	0.605544	8.84559e-06	0.000519685
Tspan2	339.279	521.377	0.619856	9.08741e-06	0.000532331
Plxnb3	214.144	343.74	0.682738	9.12479e-06	0.000532962
Tmx2	291.995	454.935	0.639717	1.0136e-05	0.000586891
Lrrn1	309.36	475.765	0.620961	1.01782e-05	0.000587637
Hspa13	320.029	496.003	0.632146	1.03075e-05	0.000593391
Bcan	103.853	179.955	0.793095	1.03697e-05	0.000595262
Ddx23	380.483	578.689	0.604958	1.11016e-05	0.000626508
Mir6236	166.233	282.432	0.764698	1.13648e-05	0.000637767
Trf	533.606	797.809	0.580268	1.14647e-05	0.000639788
Ly6h	326.219	505.312	0.631334	1.18888e-05	0.000661612
Phf1	220.741	350.522	0.667152	1.20794e-05	0.000666877
Gpr88	240.884	375.163	0.639182	1.34342e-05	0.000725449
D2Wsu81e	130.945	219.578	0.745778	1.34794e-05	0.000725933
Slc35f1	386.288	584.784	0.598228	1.36308e-05	0.000732116
Gps1	251.606	392.712	0.642308	1.43592e-05	0.000761039
Arrb2	199.552	321.857	0.689659	1.45352e-05	0.000768333
Epdr1	275.551	422.8	0.617656	1.4794e-05	0.000779957
Psmc4	396.346	599.023	0.595851	1.51251e-05	0.000793236
Them6	125.644	209.48	0.73747	1.55691e-05	0.000812269
Lrrn2	220.219	347.881	0.659657	1.58096e-05	0.000818252
Rhob	322.412	495.293	0.619374	1.58349e-05	0.000818252
Rpn1	311.678	480.338	0.623997	1.58904e-05	0.000818252
Ubxn6	191.569	305.423	0.672944	1.59288e-05	0.000818252
Cadm4	189.603	299.642	0.660259	1.64554e-05	0.000840988
Mus81	179.704	287.474	0.677812	1.66624e-05	0.000847246
Lgmn	217.279	342.209	0.655329	1.82905e-05	0.000918376
Coro1b	358.912	543.235	0.597945	1.83661e-05	0.000919864
Hhip	61.9042	114.906	0.892343	1.85276e-05	0.000923337
Arhgdig	61.6425	114.652	0.895263	1.87407e-05	0.000929333
Tril	1.33583	13.8342	3.37243	1.89454e-05	0.000937166
Tbc1d17	213.633	337.255	0.658706	2.01347e-05	0.000986254
Ctsf	266.815	412.465	0.628429	2.07668e-05	0.00100981
Mgat4b	178.608	285.655	0.677479	2.10196e-05	0.00101963
Sstr1	119.762	204.167	0.769584	2.11394e-05	0.00102296
P4hb	180.356	288.704	0.678742	2.27896e-05	0.00108448
Sppl2b	342.591	520.637	0.603789	2.31817e-05	0.00109534
Gnb2	314.768	481.159	0.612226	2.44215e-05	0.00114581
Traf7	422.648	633.421	0.583708	2.50301e-05	0.00117162
Apod	111.226	185.774	0.740049	2.55292e-05	0.0011922
Ugt8a	373.297	559.664	0.584238	2.65002e-05	0.00122611
Cpsf3l	230.29	355.678	0.62712	2.84067e-05	0.00130229
Grin2c	1.69153	14.4144	3.09112	2.85414e-05	0.0013025
Nucb1	243.832	378.39	0.633983	2.909e-05	0.00131853
Adck5	162.8	257.577	0.661905	3.17941e-05	0.00140756
Dus1l	197.039	307.95	0.644213	3.1827e-05	0.00140756
Rcn2	323.621	487.699	0.591689	3.36829e-05	0.00147016
Hist1h4i	30.0426	63.7348	1.08507	3.90491e-05	0.00166804
Rps13	87.9548	153.451	0.80294	3.96269e-05	0.00168304
Atxn7l3b	255.969	388.41	0.60161	4.10349e-05	0.00173117
Atp6v0e2	240.425	369.118	0.618494	4.33418e-05	0.00181276
Ppp2r5b	334.887	500.68	0.580214	4.36947e-05	0.00181976
Fbxl6	278.826	419.666	0.589877	4.45156e-05	0.00184643
Tuba1a	219.047	338.469	0.627783	4.46907e-05	0.00184986
Tpi1	132.687	212.178	0.677253	4.74678e-05	0.00194075
Kat5	292.883	440.117	0.587562	4.9325e-05	0.00200442
Apba3	149.848	238.825	0.672456	4.96784e-05	0.00201469
Chga	271.067	407.025	0.586469	5.04399e-05	0.00202966
Mog	180.369	282.876	0.649221	5.07875e-05	0.00202966
Ap2m1	245.201	372.855	0.604651	5.34667e-05	0.00210442
Luzp2	119.185	193.098	0.696131	5.39772e-05	0.00211871
Olfml1	26.2815	58.2774	1.14889	5.41468e-05	0.00211871
Fam134a	299.122	452.054	0.595759	5.45551e-05	0.00213052
Ppox	188.462	294.189	0.642468	5.52062e-05	0.00214578
Mcam	100.662	168.365	0.742074	5.82606e-05	0.00224893
Emc10	194.257	299.463	0.624412	5.92032e-05	0.00227218
Parm1	70.3234	122.771	0.803897	5.91245e-05	0.00227218
Tubb4b	80.0134	138.778	0.794467	5.91467e-05	0.00227218
Hapln2	283.58	427.578	0.592434	6.06896e-05	0.00231592
Degs1	171.594	268.432	0.645554	6.26844e-05	0.00237844
Fzr1	206.606	317.49	0.619828	6.37172e-05	0.00241306
Adcyap1	112.149	184.356	0.717081	6.41361e-05	0.00242434
Ostm1	232.611	351.136	0.594109	6.49334e-05	0.00244067
Msto1	79.3902	137.057	0.787743	6.51255e-05	0.00244331
Arxes1	18.1289	44.3398	1.29031	6.69991e-05	0.00249028
Akt1	215.611	328.91	0.609263	7.09622e-05	0.00259536
C1galt1c1	105.325	170.546	0.695308	7.09031e-05	0.00259536
Sdc2	93.7345	157.132	0.745327	7.14699e-05	0.00260332
Dancr	194.824	300.855	0.626894	7.35278e-05	0.00265634
Nme3	75.5155	131.659	0.801956	7.7354e-05	0.00275259
Gpaa1	199.44	305.031	0.613004	7.87935e-05	0.00279389
Por	235.721	357.933	0.60261	7.95101e-05	0.00280936
Srpk3	138.572	221.433	0.676234	8.3687e-05	0.0029158
Ercc2	230.926	351.136	0.604597	8.53461e-05	0.0029633
Ssna1	91.6443	152.882	0.738298	8.56457e-05	0.00296856
Erbb3	51.6055	95.0055	0.880486	8.91079e-05	0.00304711
Slco1c1	1.75205	13.1604	2.90909	8.95844e-05	0.00305227
Htra1	51.4149	94.7455	0.88187	9.20768e-05	0.00310121
Mrps26	142.691	224.773	0.655572	9.26033e-05	0.00311278
Zfand2b	131.964	210.087	0.670844	9.84498e-05	0.00325469
Ednrb	4.20489	19.4587	2.21028	9.90337e-05	0.0032686
U2af1l4	116.424	187.973	0.69114	0.000100251	0.00328711
Ech1	50.8473	94.3856	0.892396	0.000100741	0.00329564
Ldhd	161.471	252.157	0.643045	0.000103963	0.00336819
Ctsl	129.111	203.587	0.657034	0.000105003	0.00338517
Rab3a	231.431	347.173	0.585069	0.000105112	0.00338517
Abcb6	235.179	352.371	0.583337	0.000110629	0.00351801
Dpp7	222.307	334.658	0.590132	0.000111901	0.00355136
Pcdh20	216.609	325.518	0.587642	0.000112742	0.00356259
Ctgf	57.4563	102.816	0.839534	0.000115004	0.00360019
Edf1	62.8449	110.144	0.809518	0.000114657	0.00360019
Ptgs2	215.877	324.878	0.58969	0.000120695	0.0037259
Vars2	182.373	281.425	0.625853	0.000120949	0.00372784
Cnih1	174.527	266.784	0.612217	0.000123259	0.00379318
Ndrg2	77.589	132.854	0.77592	0.000129637	0.00393116
Aldoc	60.0534	106.666	0.828787	0.000130768	0.00393955
Atf6b	225.302	340.022	0.593771	0.000134795	0.0040366
Psmb4	152.768	237.807	0.638447	0.00013555	0.00404711
1110032F04Rik	99.4119	161.819	0.702893	0.000136086	0.00405125
Nt5c	101.54	164.183	0.693258	0.000139066	0.0041051
Surf4	146.02	226.913	0.635976	0.000139927	0.00412123
Bckdk	149.536	232.114	0.634342	0.000140576	0.00412948
BC029214	94.1752	156.372	0.731567	0.000143126	0.00419209
Psmb10	30.4183	63.015	1.05075	0.000144291	0.00422003
Rapgef3	50.3347	91.9853	0.869851	0.000147162	0.00429772
Rpl10a	144.14	224.646	0.640182	0.000150628	0.00437981
Snx17	224.369	338.393	0.592829	0.000157196	0.00454438
Nomo1	211.814	317.527	0.584079	0.000160398	0.00460151
Rps2	135.716	214.435	0.65995	0.00016055	0.00460151
Rraga	176.902	270.682	0.613644	0.000167303	0.00474753
Mgat2	127.271	196.237	0.624692	0.000186236	0.00510064
Shmt2	95.0708	156.183	0.716161	0.000191938	0.00522459
Rnf167	198.012	299.572	0.597311	0.000204164	0.00552732
Npy	4.69925	18.8587	2.00473	0.000215096	0.00573036
Ndn	65.602	112.867	0.782819	0.000217686	0.00579166
Sstr2	117.438	183.204	0.641553	0.000225589	0.00594665
Rnasek	80.06	132.994	0.732203	0.000230666	0.00605656
Mrpl32	145.972	221.788	0.603492	0.000233233	0.00610796
Tm2d2	55.6735	98.8196	0.827805	0.000233889	0.00610917
Rpl13a	166.842	250.234	0.58479	0.000246177	0.00634737
Adrm1	120.473	188.171	0.643336	0.000248597	0.00638175
Dio2	11.612	31.4352	1.43677	0.000256158	0.00650427
Snhg9	114.777	182.596	0.669827	0.000257746	0.00653631
Sepp1	54.749	97.1655	0.827611	0.000259587	0.00657467
Cyr61	51.9929	91.8332	0.8207	0.000264776	0.00668077
Adgrg1	31.1422	62.3166	1.00074	0.000267434	0.00673088
Dnpep	87.3329	143.711	0.718576	0.000268249	0.00673445
Acsbg1	9.24709	26.6702	1.52816	0.000276234	0.00688318
Rpl41	132.558	205.395	0.631778	0.000300861	0.00736852
Pdgfra	4.16942	17.1325	2.03881	0.000310825	0.0075755
Rps18	37.786	71.0467	0.910916	0.00032881	0.00793659
Rhbdf1	58.24	100.55	0.787825	0.000329306	0.00793901
Nptx2	149.127	223.913	0.586394	0.000332233	0.00795912
Pgp	70.6763	118.03	0.739858	0.000340954	0.00811244
Mrpl12	50.2539	88.8956	0.822878	0.000351498	0.00832378
Ctu2	114.585	178.142	0.636611	0.000371729	0.00867974
Abcb8	149.577	227.567	0.605401	0.000385107	0.00890904
Hist1h1c	18.1398	40.9359	1.17421	0.000390979	0.00898554
Surf1	161.074	241.257	0.582849	0.000391233	0.00898554
Dcaf12l1	53.1733	94.3133	0.826758	0.000401559	0.00913148
Mrpl4	154.289	231.496	0.585354	0.000409501	0.00927572
Gprc5b	131.934	202.24	0.616253	0.00042129	0.00947878
Use1	133.831	204.18	0.609431	0.000431059	0.00964898
Atp5k	78.2304	126.565	0.694079	0.000434316	0.0097002
Mrpl28	84.0033	134.413	0.678153	0.000447716	0.00994405
Creb3	120.949	183.927	0.60474	0.00047483	0.0104154
1600002H07Rik	127.162	195.427	0.619969	0.000482669	0.0105093
1810037I17Rik	58.1457	99.0425	0.768375	0.000481598	0.0105093
Hras	118.652	183.136	0.626173	0.000483969	0.0105093
Cnp	126.86	194.113	0.613658	0.000494428	0.0106591
Lypd6	21.735	45.9517	1.0801	0.000499942	0.0107236
Megf10	125.139	190.136	0.603498	0.00050165	0.0107258
Mrps34	59.3693	100.177	0.754757	0.000504126	0.0107558
Slc39a12	4.67254	17.1333	1.87452	0.000503901	0.0107558
Vps28	144.969	217.202	0.583293	0.000505006	0.0107631
Ergic3	77.5548	125.38	0.693018	0.000517803	0.0109774
Ifrd2	89.3861	144.158	0.689534	0.000519035	0.0109803
Mid1ip1	33.6276	63.5118	0.91738	0.000526322	0.0110993
Unc5b	51.3407	88.703	0.788879	0.000531151	0.0111659
Rps8	98.7415	154.319	0.644184	0.000549281	0.0114748
Pcdh8	83.1795	130.964	0.654867	0.000557847	0.0116295
Slc35b2	67.9701	112.059	0.721281	0.000563866	0.0117305
Rps21	75.4524	122.321	0.697029	0.000595277	0.0121941
Fkrp	125.62	191.396	0.607499	0.000613838	0.0124831
Gsn	96.4105	150.223	0.639845	0.000616986	0.0125108
Htra2	140.738	211.833	0.58991	0.000703021	0.0137946
Mt1	27.7844	53.4224	0.943168	0.000703948	0.0137993
Pip5kl1	95.5296	150.487	0.655619	0.000733631	0.0142695
Uqcr10	94.331	148.507	0.654724	0.000747455	0.0144681
Mfsd5	41.1689	73.6412	0.838957	0.000760169	0.0146161
Pfdn5	40.1381	71.0195	0.823244	0.000759486	0.0146161
Slc25a39	110.26	167.176	0.600458	0.000761816	0.014633
Igf2	0.382068	7.06812	4.20942	0.000771555	0.0147518
Ppp1r14b	18.0002	39.7064	1.14136	0.000771683	0.0147518
Clic4	37.0541	67.2528	0.859961	0.000786288	0.0149454
Gm1673	60.6562	100.71	0.731481	0.000807031	0.0152385
Rps25	80.2597	126.562	0.657099	0.000828631	0.0155584
Abcd4	99.2761	153.704	0.630635	0.000846569	0.0158063
Ttyh2	134.007	200.895	0.584134	0.000859069	0.0159653
Spcs1	72.419	116.885	0.690655	0.000862703	0.0160031
Ndufaf3	59.5538	100.524	0.755272	0.000869287	0.0160955
Mien1	35.2234	65.6743	0.898794	0.000873376	0.0161413
B2m	114.165	173.544	0.604174	0.000885621	0.0162898
Gpx1	29.5901	56.3288	0.928757	0.000885487	0.0162898
Rasgrp2	102.149	157.225	0.622159	0.000886079	0.0162898
Slc38a3	18.7188	40.0352	1.09678	0.000882735	0.0162898
Gm2a	64.4984	104.295	0.693332	0.000896544	0.0164031
Hsf4	87.5377	136.253	0.638311	0.000903557	0.0165012
Tmem107	77.7893	123.267	0.664141	0.000938495	0.0169845
Grem2	51.7043	87.3143	0.755932	0.000949207	0.0171239
Tmem256	61.362	101.593	0.727381	0.000955294	0.0171953
Paqr4	71.4971	113.111	0.661786	0.00096038	0.0172558
Mertk	2.86128	13.8092	2.2709	0.00101737	0.0179893
Rps5	67.3191	110.117	0.709948	0.00102524	0.0180648
Bmp2	14.2306	32.4351	1.18856	0.00102626	0.0180668
Prkd3	105.112	159.678	0.603235	0.00103075	0.0181141
Tfr2	89.877	140.072	0.640141	0.00107239	0.0186334
Ppan	119.491	178.837	0.58175	0.00111062	0.0190705
Stub1	121.893	182.524	0.582476	0.00112044	0.0191037
Gjb6	2.95856	13.1739	2.15472	0.00123019	0.0204528
Mrpl53	88.8019	136.49	0.620135	0.00127417	0.0210459
Hmbs	102.113	155.34	0.605268	0.00128677	0.0211855
Laptm4b	101.896	156.812	0.621936	0.0012988	0.0213455
Fgfr3	21.669	44.2519	1.03011	0.00135488	0.0221039
Polr2e	102.529	154.361	0.590273	0.0013661	0.0222147
Hapln1	5.19149	17.0864	1.71863	0.00139974	0.022688
Unc13d	4.80164	16.3861	1.77087	0.00140347	0.0227102
Ndufb8	77.7126	121.712	0.647254	0.00141087	0.0227947
Tpbg	69.9922	110.959	0.664763	0.00142641	0.0229717
Nptxr	46.434	79.016	0.766964	0.00142928	0.0229994
Caskin2	18.0521	39.0597	1.11351	0.00149104	0.0237642
Kdelr1	74.3273	115.694	0.638347	0.00163209	0.0251517
Plxnb1	102.579	154.524	0.591094	0.00167383	0.0255591
Tlr3	2.06637	10.8413	2.39137	0.00168882	0.0257487
Gm10778	3.2956	13.5906	2.04399	0.00169723	0.0258573
Gale	98.8303	149.569	0.597787	0.0017019	0.0259086
Met	59.2885	93.8988	0.663354	0.00181507	0.0272588
Tceb2	31.8189	56.498	0.828317	0.00192311	0.0283172
Gstp1	58.484	96.2867	0.719295	0.00195203	0.0286028
Mrpl36	52.2258	86.7745	0.73251	0.00196229	0.0287163
Rps9	65.6855	102.165	0.637258	0.00198469	0.0289805
Fam213b	47.2276	78.0806	0.725333	0.00200332	0.0291611
Sdc4	1.02516	8.40519	3.03544	0.00207709	0.0299154
Tmem179b	73.736	113.723	0.625082	0.00220171	0.0314167
Gpr37l1	7.12538	19.9669	1.48657	0.00222482	0.031589
Rplp1	38.5718	66.247	0.780309	0.00225975	0.0319265
Snord37	16.6498	35.7678	1.10316	0.00228635	0.0322115
Rftn2	11.2237	27.158	1.27483	0.00229769	0.0323257
Ier2	23.2938	45.1511	0.954814	0.00231875	0.0325079
Cyp2j9	6.45466	18.9739	1.5556	0.00263328	0.0357178
Nudt17	56.7136	90.3579	0.671955	0.0027613	0.0369292
Mt3	67.3784	105.08	0.641135	0.00280403	0.0373759
Lpar1	52.0265	83.1893	0.677152	0.00282363	0.0375621
Cox5b	82.8108	126.636	0.612801	0.00283729	0.0377189
Gstm5	46.0998	75.63	0.714199	0.00284248	0.0377628
Pla2g7	11.8613	27.1906	1.19684	0.00286398	0.0379403
Nifk	75.7445	115.22	0.605172	0.00287468	0.0380392
Rpsa	72.4368	111.318	0.619889	0.00290232	0.0383038
Hepacam	77.276	118.739	0.619703	0.00293223	0.0385967
Rpl24	63.9982	99.3116	0.633931	0.00301277	0.0393325
Hgh1	82.2694	124.584	0.598688	0.00309852	0.0402152
Cmtm5	26.8755	48.8895	0.863232	0.00313147	0.0405008
Cisd1	52.0654	83.3533	0.678914	0.00319713	0.041217
Sh3tc2	24.5489	46.1631	0.911085	0.00342722	0.0432373
Cnpy2	47.1318	75.947	0.688292	0.00346971	0.043636
Qpct	31.1548	55.133	0.823462	0.00363049	0.0451478
AI413582	90.6272	135.551	0.58082	0.0036393	0.045217
Psme1	44.1922	72.7273	0.718707	0.0037165	0.0460175
Opalin	65.0881	97.6097	0.58463	0.00375052	0.0462577
Fbll1	40.8017	68.702	0.751724	0.00376357	0.0463426
Rabac1	63.6207	98.4753	0.630267	0.00379429	0.0466348
Ntsr2	33.057	56.5573	0.774758	0.00382484	0.0468093
Smpdl3a	55.0886	87.4345	0.666448	0.00382746	0.0468128
Chst12	43.1399	71.1345	0.721528	0.00406541	0.0489168
Uqcrq	44.2683	70.7759	0.676985	0.00411165	0.0493546

## Sheet: downregulated1.5Fold
id	baseMeanA	baseMeanB	log2FoldChange	pval	padj
9530091C08Rik	1239.63	270.66	-2.19536	2.54805e-59	5.10476e-55
5031426D15Rik	2904.24	748.391	-1.9563	1.70149e-54	1.70439e-50
Lrtm1	657.279	190.428	-1.78726	2.68983e-35	1.79627e-31
Mir128-2	226.784	46.3842	-2.28961	6.74787e-34	3.37967e-30
Nrg3os	410.211	113.377	-1.85524	6.0596e-32	2.42796e-28
4930480K15Rik	584.377	197.585	-1.56443	1.45862e-27	4.87033e-24
Muc6	223.669	57.212	-1.96698	1.42344e-26	4.07388e-23
4921534H16Rik	333.237	106.148	-1.65047	1.1076e-24	2.7737e-21
Cdr1	3965.58	1717.21	-1.20746	1.24373e-23	2.76854e-20
6330415B21Rik	356.726	118.908	-1.58497	1.41107e-23	2.82693e-20
Gm8179	157.848	37.4886	-2.07401	2.23974e-23	4.07917e-20
Gm5415	249.737	76.9983	-1.69751	2.33563e-22	3.89934e-19
4931430N09Rik	177.612	48.3021	-1.87857	1.34786e-21	2.07716e-18
Snord17	6737.02	3023.97	-1.15567	8.72193e-21	1.24811e-17
F630111L10Rik	449.256	171.129	-1.39245	3.43441e-20	4.587e-17
C230004F18Rik	1167.85	512.03	-1.18956	6.37981e-20	7.98832e-17
4930545L23Rik	198.238	61.398	-1.69097	2.03584e-19	2.39917e-16
Snora70	561.025	224.947	-1.31848	2.48666e-19	2.76765e-16
Acot10	150.132	41.7923	-1.84493	7.28352e-19	7.67989e-16
Kcnq1ot1	19712.6	9734.83	-1.01789	4.71471e-18	4.72273e-15
Gm20172	173.944	55.8667	-1.63856	5.08086e-17	4.84714e-14
Lincpint	1035.66	494.941	-1.06522	2.56799e-16	2.33851e-13
1700123L14Rik	117.693	33.3122	-1.8209	5.30739e-16	4.62296e-13
Ube3a	4855.65	2481.54	-0.968425	8.03555e-16	6.70768e-13
Erc2	3281.85	1666.77	-0.977454	8.59376e-16	6.88669e-13
Igfn1	782.726	370.683	-1.07832	1.00735e-15	7.76206e-13
Gm5136	152.952	50.6961	-1.59313	2.10489e-15	1.56183e-12
5530401A14Rik	140.218	46.7942	-1.58327	4.70648e-15	3.36749e-12
Tbrg3	1324.61	674.722	-0.973205	1.95367e-14	1.34965e-11
Pcsk2os2	487.772	224.977	-1.11643	2.12634e-14	1.41997e-11
C630031E19Rik	349.736	153.355	-1.18939	3.53311e-14	2.2833e-11
C230091D08Rik	2310.53	1230.89	-0.908517	1.81253e-13	1.13476e-10
2310075C17Rik	393.21	184.196	-1.09406	2.72147e-13	1.65218e-10
Iqcj	154.076	55.9672	-1.46099	3.21472e-13	1.89423e-10
Runx2	528.151	258.153	-1.03273	4.42389e-13	2.53223e-10
4930594C11Rik	214.167	88.2746	-1.27866	6.83287e-13	3.80249e-10
1700080N15Rik	77.8958	21.5131	-1.85633	1.57957e-12	8.32765e-10
Meg3	150658	85374	-0.819408	2.07033e-12	1.06351e-09
3110039I08Rik	1893.98	1040.54	-0.864091	3.43666e-12	1.67927e-09
A930011G23Rik	149.319	57.5953	-1.37437	4.13065e-12	1.9245e-09
1700071K01Rik	50.7842	10.0511	-2.33702	4.7188e-12	2.03058e-09
4930539N22Rik	127.087	46.3143	-1.45629	4.72619e-12	2.03058e-09
Angptl2	203.167	86.1886	-1.2371	4.72775e-12	2.03058e-09
Gm16523	489.756	244.681	-1.00116	4.76376e-12	2.03058e-09
8430431K14Rik	184.144	78.0642	-1.2381	2.6291e-11	9.75398e-09
1700085C21Rik	35.8303	5.58127	-2.68251	2.84458e-11	1.03615e-08
Arpp21	11276.1	6540.01	-0.785904	2.93773e-11	1.05097e-08
Kcnip4	615.451	327.01	-0.912309	5.26038e-11	1.78621e-08
A330076H08Rik	1013.72	561.883	-0.851311	5.54897e-11	1.82243e-08
Gpr171	224.538	102.338	-1.13362	6.22767e-11	1.9804e-08
4930405O22Rik	123.076	46.9985	-1.38886	7.11356e-11	2.22677e-08
Bcas3os1	117.31	45.2089	-1.37565	7.41706e-11	2.28605e-08
Fam205a1	69.7104	20.6337	-1.75637	1.16933e-10	3.44505e-08
4930509J09Rik	60.7858	16.8118	-1.85426	1.29867e-10	3.77066e-08
4933413L06Rik	129.676	51.1701	-1.34154	1.50685e-10	4.31259e-08
LOC100862268	277.671	135.778	-1.03213	1.53466e-10	4.33032e-08
Sorbs2os	1341.76	764.955	-0.810679	1.93508e-10	5.23883e-08
E030024N20Rik	546.409	293.713	-0.895574	2.62503e-10	7.01198e-08
Gm15412	42.0713	8.58621	-2.29274	2.81441e-10	7.41894e-08
Fndc9	424.679	222.266	-0.934084	3.16233e-10	8.12233e-08
Ipw	6553.94	3927.87	-0.738615	3.12521e-10	8.12233e-08
Rgs9	1055.33	593.077	-0.831409	3.24617e-10	8.23213e-08
5330434G04Rik	775.972	434.001	-0.838307	3.69733e-10	9.25903e-08
Hivep3	1106.2	633.987	-0.803087	6.84376e-10	1.63224e-07
Alas2	126.346	52.1698	-1.27609	8.81689e-10	2.07809e-07
P2ry14	156.545	70.2362	-1.15629	1.08695e-09	2.47455e-07
Gm16386	466.268	252.071	-0.88733	1.13731e-09	2.5601e-07
4932413F04Rik	144.445	63.1823	-1.19293	1.19468e-09	2.65935e-07
Vmn2r85	196.093	92.429	-1.08512	1.3928e-09	3.0663e-07
Adam4	118.159	48.7808	-1.27635	1.93739e-09	4.17352e-07
A230057D06Rik	550.052	308.253	-0.83545	2.06763e-09	4.3603e-07
Gm4787	111.545	44.795	-1.31622	2.10373e-09	4.39022e-07
Gm6588	89.5411	33.8686	-1.4026	2.17836e-09	4.4991e-07
9530059O14Rik	918.248	536.209	-0.77609	2.38833e-09	4.88244e-07
Elavl3	921.768	539.047	-0.773992	2.79795e-09	5.54991e-07
Ksr2	633.404	362.722	-0.804262	3.67375e-09	7.00952e-07
Gja6	189.914	91.1117	-1.05964	4.43023e-09	8.29487e-07
4933431G14Rik	216.154	107.39	-1.0092	4.77564e-09	8.85881e-07
Gm5441	78.3671	28.1632	-1.47644	5.60361e-09	1.02057e-06
Srrm4os	540.926	309.956	-0.803365	7.20436e-09	1.27728e-06
Fam205c	376.198	208.749	-0.849726	7.83687e-09	1.37723e-06
Gm32014	148.579	66.6172	-1.15727	8.90799e-09	1.52532e-06
Gm15413	121.775	53.477	-1.18723	1.08853e-08	1.8481e-06
Xirp2	895.893	535.289	-0.743008	1.20067e-08	2.00452e-06
Uchl4	93.3993	37.1277	-1.33092	1.35575e-08	2.22632e-06
Gm20199	524.454	299.925	-0.806213	1.42348e-08	2.31847e-06
Erc1	925.345	553.154	-0.742309	1.57e-08	2.4963e-06
Lrrtm4	1117.4	674.174	-0.728958	1.66037e-08	2.61921e-06
Rims2	3202.95	2002.37	-0.677698	2.07803e-08	3.15818e-06
4930405A21Rik	68.9887	24.7872	-1.47676	2.2968e-08	3.43388e-06
Rad51ap2	346.71	191.64	-0.855334	2.32358e-08	3.44819e-06
2010106C02Rik	30.4898	5.73286	-2.411	2.34344e-08	3.45209e-06
Mir29b-1	63.4871	22.0727	-1.5242	2.48195e-08	3.62944e-06
A430090L17Rik	67.9968	24.1354	-1.49432	2.78567e-08	4.04407e-06
4930444F02Rik	89.6503	36.373	-1.30144	2.93102e-08	4.19429e-06
A930013F10Rik	738.494	442.698	-0.738264	3.44239e-08	4.85667e-06
Gm11186	65.8494	23.6233	-1.47896	3.42481e-08	4.85667e-06
4930419G24Rik	337.711	188.637	-0.840177	4.52529e-08	6.29581e-06
4921511H03Rik	45.1365	13.2216	-1.7714	4.57665e-08	6.32336e-06
4930567K12Rik	77.9464	29.1599	-1.4185	4.6184e-08	6.33733e-06
Nxpe2	63.9402	22.2252	-1.52452	4.76228e-08	6.4903e-06
Vmn2r87	245.174	131.172	-0.902344	4.9559e-08	6.70855e-06
Polq	473.185	276.142	-0.776994	5.68902e-08	7.59825e-06
Magi2	2527.51	1593.64	-0.665388	6.33129e-08	8.40006e-06
Samd5	161.773	78.8092	-1.03754	6.37535e-08	8.40288e-06
Rbm6	1076.23	666.173	-0.692023	6.63041e-08	8.6464e-06
1700123O21Rik	38.064	10.2136	-1.89793	6.71929e-08	8.68479e-06
C130050O18Rik	54.9965	18.1765	-1.59727	7.73102e-08	9.80274e-06
Dlg2	3641.16	2320.7	-0.649842	1.00162e-07	1.23107e-05
Gm6402	42.7247	12.0635	-1.82442	1.07658e-07	1.30716e-05
A830082K12Rik	403.385	234.499	-0.782573	1.12915e-07	1.36273e-05
Nova2	734.082	450.671	-0.703867	1.16877e-07	1.4021e-05
D830031N03Rik	368.255	213.127	-0.788988	1.34867e-07	1.59384e-05
Golga4	3031.31	1940.62	-0.64342	1.35246e-07	1.59384e-05
Map6	1478.31	937.498	-0.657056	1.42681e-07	1.67162e-05
Mab21l1	291.461	165.572	-0.815841	1.48794e-07	1.71319e-05
Tnks1bp1	605.481	369.802	-0.711327	1.67227e-07	1.88715e-05
Gm15881	52.863	17.4254	-1.60107	2.18215e-07	2.41531e-05
4930563F08Rik	38.3956	10.5495	-1.86377	2.26835e-07	2.48329e-05
Ylpm1	4039.32	2628.38	-0.619937	2.26019e-07	2.48329e-05
Snhg14	2214.51	1429.9	-0.631071	2.48854e-07	2.69489e-05
Krt20	103.084	47.8929	-1.10593	2.69631e-07	2.88865e-05
Gpatch8	1995.68	1285.59	-0.634446	2.97451e-07	3.13638e-05
Uri1	618.374	376.133	-0.717236	3.00771e-07	3.14976e-05
2020-09-08	1690.63	1090.35	-0.632774	3.27131e-07	3.36905e-05
Auts2	764.956	479.732	-0.673147	3.39536e-07	3.47055e-05
Serpind1	161.332	83.1985	-0.955405	3.46089e-07	3.50179e-05
Gpr87	73.681	30.5494	-1.27015	4.05453e-07	4.04122e-05
Mlip	382.374	224.475	-0.768431	4.12084e-07	4.06826e-05
A330015K06Rik	187.996	101.229	-0.893089	5.56339e-07	5.43692e-05
AF357425	181.948	98.6515	-0.883115	6.17377e-07	5.94641e-05
Eml5	5730.07	3796.34	-0.593944	6.28818e-07	5.99892e-05
Muc15	433.112	262.205	-0.724043	6.27596e-07	5.99892e-05
4930532I03Rik	133.475	67.4704	-0.984239	6.95226e-07	6.47821e-05
Dlgap2	1497.37	971.426	-0.624252	7.48688e-07	6.91208e-05
Fgf14	642.705	405.594	-0.664119	7.45517e-07	6.91208e-05
Gm10538	130.964	66.9616	-0.967767	7.91189e-07	7.17226e-05
Gm1653	176.494	94.9374	-0.894573	8.21464e-07	7.41315e-05
Klhl3	256.964	148.526	-0.790847	8.91027e-07	7.96912e-05
Gm16907	338.601	202.515	-0.741559	9.14851e-07	8.12141e-05
1300002E11Rik	307.864	183.532	-0.746266	1.0204e-06	8.84962e-05
4930449E18Rik	51.3351	18.0093	-1.5112	1.14845e-06	9.87472e-05
Jakmip1	690.456	438.298	-0.655638	1.18173e-06	0.000101174
Vmn2r86	114.442	55.5362	-1.04312	1.32865e-06	0.000113198
AA543401	44.941	15.0221	-1.58095	1.40071e-06	0.000117414
Wnk2	1626.93	1078.43	-0.593225	1.54589e-06	0.000127977
Ppp2r2cos	330.875	199.418	-0.730488	1.61535e-06	0.000133176
Fyco1	1265.34	830.695	-0.607137	1.77506e-06	0.000143974
Rbm4b	298.05	177.258	-0.749705	1.98517e-06	0.00015845
Mapk1ip1	652.781	420.581	-0.634215	2.05872e-06	0.00016238
2210408F21Rik	174.48	95.9404	-0.862851	2.14132e-06	0.000167931
Gm9839	42.8309	14.799	-1.53316	2.14587e-06	0.000167931
Gm11149	45.5042	15.6181	-1.54278	2.19171e-06	0.000170851
P2ry13	70.791	29.7817	-1.24914	2.20288e-06	0.000171056
Xkr6	381.966	235.665	-0.696705	2.31577e-06	0.000179128
Myo16	639.196	409.211	-0.643414	2.32947e-06	0.000179495
Zfhx2	991.01	650.153	-0.60812	2.35841e-06	0.000180337
Timp3	202.691	115.786	-0.807819	2.37887e-06	0.00018121
Macrod2	539.128	342.306	-0.655339	2.40642e-06	0.000182614
Speer4b	89.8471	42.632	-1.07554	2.4687e-06	0.000185932
Gm5803	22.6955	5.05316	-2.16715	2.51774e-06	0.000188915
Zbtb16	559.985	355.995	-0.653531	2.55583e-06	0.000190347
Gm4432	77.96	34.6779	-1.16872	3.00202e-06	0.000220046
Zfp407	819.747	531.715	-0.624525	3.00951e-06	0.000220046
Mir690	26.3922	6.35585	-2.05396	3.14575e-06	0.000229171
Rtl1	464.685	296.2	-0.649684	3.28202e-06	0.000237372
Shank2	1392.65	930.96	-0.581045	3.2947e-06	0.000237432
Srrm3	673.401	435.46	-0.628925	3.47935e-06	0.000247182
4933427D14Rik	1318.28	876.516	-0.588808	3.54702e-06	0.000251099
Gm13315	52.736	20.7205	-1.34773	3.56557e-06	0.000251523
Gpr183	80.4881	38.1258	-1.07801	3.64835e-06	0.000255151
Ralyl	865.148	570.892	-0.59973	3.71176e-06	0.000258199
Nron	107.17	54.7777	-0.968239	3.96274e-06	0.000273757
Angpt2	137.277	74.9961	-0.872202	4.36151e-06	0.000299242
Apex2	182.498	103.925	-0.812346	4.56833e-06	0.000308155
Sox5	581.009	375.381	-0.630204	4.56051e-06	0.000308155
Tcte2	73.2642	33.5998	-1.12466	4.73862e-06	0.000316445
Zfp609	809.63	535.581	-0.596157	4.9351e-06	0.00032523
C030023E24Rik	1026.42	680.758	-0.592402	4.97842e-06	0.000327009
Cep112	204.001	116.543	-0.807712	5.39159e-06	0.000349563
Snora64	282.517	169.777	-0.734693	6.45829e-06	0.000400574
Gm12338	124.491	66.5911	-0.902643	6.61258e-06	0.00040762
D730045A05Rik	66.7807	30.2103	-1.14439	6.84061e-06	0.000420383
Gm20324	64.601	28.523	-1.17943	8.29736e-06	0.000499187
Kcnj13	92.0425	45.665	-1.01121	8.52292e-06	0.000509696
Gm15941	71.996	33.5495	-1.10162	8.60152e-06	0.000510067
Retnlb	9.8002	0.648838	-3.91688	8.55662e-06	0.000510067
Mkln1os	92.323	46.688	-0.983639	9.60787e-06	0.000557925
Elk3	314.166	197.84	-0.667195	1.04998e-05	0.000600399
Rgs6	394.574	252.753	-0.642565	1.05191e-05	0.000600399
Ppp1r12b	795.337	530.414	-0.584448	1.07045e-05	0.000609246
Mir493	23.1176	5.69415	-2.02144	1.12504e-05	0.000633119
Mir665	41.0884	14.9059	-1.46285	1.19259e-05	0.00066184
Ccdc136	650.715	433.647	-0.585503	1.20833e-05	0.000666877
Gm14326	331.921	208.32	-0.672039	1.22491e-05	0.000674173
Teddm1b	54.2337	23.3005	-1.21883	1.24783e-05	0.000684902
8030451O07Rik	33.968	11.0558	-1.61937	1.26543e-05	0.000692666
Fn3k	467.111	304.429	-0.61766	1.27778e-05	0.000695628
Zfp385b	305.423	192.066	-0.669208	1.29297e-05	0.000701986
Fam228a	102.7	52.425	-0.970108	1.37156e-05	0.000734703
Gm15880	52.8787	21.924	-1.27017	1.39836e-05	0.000745074
Srd5a1	82.0961	40.6113	-1.01543	1.49396e-05	0.000785562
Baiap2l1	91.4277	46.5088	-0.975126	1.66599e-05	0.000847246
Morc2b	265.462	164.077	-0.694132	1.69616e-05	0.000860275
Tex9	368.408	237.463	-0.633603	1.76079e-05	0.000888556
Dnm3os	582.672	387.068	-0.590098	1.86031e-05	0.000924803
2700054A10Rik	60.0555	27.1729	-1.14413	2.04143e-05	0.000997513
1700006F04Rik	25.8679	7.41062	-1.8035	2.07302e-05	0.00100981
Hs6st3	231.732	143.353	-0.692879	2.17553e-05	0.00104442
4930471G03Rik	23.9436	6.0909	-1.97491	2.29698e-05	0.00109046
Ulk4	400.36	261.543	-0.614249	2.30254e-05	0.00109052
4933424G05Rik	237.373	147.431	-0.687111	2.58438e-05	0.00120129
1700034H15Rik	86.2817	44.7481	-0.947228	2.85114e-05	0.0013025
4930519F16Rik	69.511	33.3878	-1.05792	2.89537e-05	0.00131533
AI854517	399.553	260.417	-0.617561	2.98076e-05	0.00134801
A530046M15Rik	52.7112	22.8479	-1.20605	3.05046e-05	0.00136718
Hmgb4os	18.5747	3.97422	-2.22459	3.0459e-05	0.00136718
4921511I17Rik	97.5747	52.0305	-0.90715	3.06183e-05	0.00136921
Pitpnm2os1	85.3921	43.4127	-0.975984	3.07482e-05	0.00137196
Cabp1	434.222	288.329	-0.590717	3.26612e-05	0.00143494
Gpr18	63.7723	29.6102	-1.10683	3.3078e-05	0.00145007
Snord118	78.2545	39.6102	-0.982303	3.59121e-05	0.00155728
P2ry12	73.826	35.5397	-1.0547	3.69129e-05	0.00159378
Nfatc2	116.004	64.1341	-0.855017	3.7001e-05	0.00159415
Arhgap20os	186.926	114.294	-0.709714	4.02435e-05	0.00170452
1700024B18Rik	31.2244	10.6597	-1.5505	4.10455e-05	0.00173117
1700109K24Rik	429.528	285.57	-0.588909	4.26838e-05	0.00179272
Ciita	95.8604	50.3248	-0.929666	4.37819e-05	0.00181976
Wdr78	353.818	232.619	-0.605037	4.53274e-05	0.00186849
Aldh1l2	109.896	60.9817	-0.849695	4.82926e-05	0.00197046
1810034E14Rik	79.344	41.5074	-0.934752	5.09913e-05	0.00202966
4930447F24Rik	57.4521	25.75	-1.15779	5.08441e-05	0.00202966
Ccdc148	157.299	92.9453	-0.759051	5.04984e-05	0.00202966
Park2	213.227	132.328	-0.688273	5.08534e-05	0.00202966
Vmn2r84	160.426	95.1938	-0.752973	5.18545e-05	0.00205307
A730017L22Rik	109.532	61.2615	-0.838302	5.2825e-05	0.00208326
Fam222b	255.024	164.586	-0.631793	5.51166e-05	0.00214578
H2-T24	354.9	236.604	-0.584935	5.7257e-05	0.00221445
Dym	418.249	277.829	-0.590163	5.99317e-05	0.00229574
Gm16861	55.3107	24.7552	-1.15983	6.25409e-05	0.0023775
1700095J12Rik	28.2957	9.02826	-1.64806	6.45211e-05	0.0024343
Prox2	147.411	87.2631	-0.756399	6.96837e-05	0.00258527
2020-03-02	322.154	211.141	-0.609548	7.04568e-05	0.00259267
Slc2a2	34.1786	12.3314	-1.47076	7.05303e-05	0.00259267
Acot4	62.3695	30.04	-1.05396	7.35136e-05	0.00265634
2900041M22Rik	74.8539	38.0592	-0.975834	7.43062e-05	0.0026726
Snora78	212.879	134.645	-0.660876	7.56336e-05	0.00270097
Gm16023	197.656	121.6	-0.700845	7.72325e-05	0.00275259
AW554918	303.36	199.167	-0.607053	8.01092e-05	0.00282554
Pcdha8	88.565	47.8863	-0.887123	8.09072e-05	0.00284867
Ccdc110	35.0276	13.4333	-1.38268	8.64136e-05	0.00298774
Lrriq1	309.085	204.257	-0.597614	8.64975e-05	0.00298774
Parp11	235.315	150.64	-0.643487	8.78524e-05	0.00302411
Hsd3b5	12.9328	2.11421	-2.61284	8.84241e-05	0.00303337
Pgs1	211.238	134.078	-0.655802	8.94379e-05	0.00305227
Pcdhgb8	170.872	104.747	-0.706014	9.134e-05	0.00309629
A330102I10Rik	262.093	169.808	-0.626176	9.19437e-05	0.00310121
Gm14057	162.422	98.7651	-0.717674	9.21044e-05	0.00310121
Sgcz	336.93	223.351	-0.593136	9.35732e-05	0.00313486
A730090N16Rik	101.723	56.5439	-0.847196	9.50784e-05	0.00317111
Rassf8	59.6202	28.3338	-1.07328	9.61607e-05	0.00319483
Sfxn5	270.898	176.762	-0.615943	9.67249e-05	0.00320826
Nell1os	22.9493	6.96798	-1.71963	9.94389e-05	0.00327352
9430021M05Rik	137.72	81.6454	-0.754296	0.000102555	0.00333537
Cmya5	247.96	159.642	-0.635262	0.000109075	0.00348519
Vasn	371.38	248.253	-0.581083	0.000112033	0.00355136
Spata4	36.8171	15.1216	-1.28376	0.000114566	0.00360019
Zfp750	68.2115	33.8203	-1.01213	0.00011501	0.00360019
1700028K03Rik	243.766	159.24	-0.614289	0.000119701	0.00371222
Prkag2os1	102.158	56.9733	-0.842446	0.000120596	0.0037259
Fbxw8	249.287	161.759	-0.62396	0.000124985	0.00384042
Ccl19	18.1418	4.77557	-1.92558	0.0001268	0.00386652
Csmd2os	30.1268	11.175	-1.43078	0.000128321	0.00390698
Cxcl17	29.5727	10.5044	-1.49327	0.000129704	0.00393116
Maml3	143.039	86.3571	-0.728019	0.000129449	0.00393116
Angptl3	75.3961	39.3457	-0.938283	0.000130443	0.00393955
4833422C13Rik	200.965	126.955	-0.662629	0.000131337	0.00395075
Tor3a	125.947	75.1023	-0.745894	0.000138247	0.00410316
4930587E11Rik	134.311	79.5615	-0.755439	0.000138837	0.0041051
Lyzl4	41.5402	17.3766	-1.25736	0.000139132	0.0041051
Mir7220	63.6179	31.7017	-1.00487	0.000149474	0.00435257
Adamts17	207.008	132.067	-0.648413	0.000153376	0.0044468
Ube2d2b	77.8659	42.1213	-0.886442	0.000169494	0.00476248
Zfp3	113.576	67.0439	-0.760485	0.000168774	0.00476248
Dlx6os1	73.7975	38.9679	-0.921286	0.000173013	0.00482492
Dnmt3aos	44.5023	19.7523	-1.17186	0.000173722	0.00482891
Gper1	52.4619	25.1334	-1.06166	0.000174087	0.00483055
2900079G21Rik	136.969	83.3993	-0.715747	0.000179406	0.00495755
Gm15787	77.1225	41.6098	-0.890229	0.000191491	0.00522459
Gm20752	36.0951	14.8397	-1.28234	0.000206219	0.00555295
Hmgb4	20.5579	5.911	-1.79822	0.000206575	0.00555507
Abca17	70.9766	37.8687	-0.906336	0.000221105	0.00585929
Gpr21	244.667	161.624	-0.598181	0.000226052	0.00595103
Samd12	179.82	113.465	-0.66431	0.000238539	0.00619028
Snora7a	210.272	137.203	-0.615947	0.000270398	0.00677992
Pcdha11	119.665	73.3101	-0.706917	0.000280179	0.00695553
Pcdhac1	96.0574	55.3591	-0.795076	0.000288049	0.00711562
Pdzrn4	158.197	99.0017	-0.676199	0.000288745	0.00712404
Rgsl1	155.802	97.0106	-0.6835	0.00029862	0.00733155
Snord49a	111.989	65.6976	-0.76945	0.000305872	0.00747297
Blcap	255.443	170.229	-0.58552	0.000313715	0.00762739
Nsun4	115.781	70.6038	-0.713579	0.000332524	0.00795912
Snora20	73.4374	40.4623	-0.859939	0.000338516	0.00809289
4930428E07Rik	24.8617	8.87991	-1.48531	0.000339377	0.00810379
1700024P16Rik	167.377	104.529	-0.679201	0.000340672	0.00811244
Acr	37.9526	16.6487	-1.18879	0.000347148	0.0082305
2610015P09Rik	248.566	165.656	-0.585436	0.000355607	0.00839131
Mir3068	69.6105	36.8505	-0.91762	0.00036157	0.00851198
Bcas3os2	8.24913	0.829416	-3.31407	0.000370807	0.00866833
Kcnk18	13.6516	3.05642	-2.15916	0.000377461	0.00878287
4931406H21Rik	58.5401	29.886	-0.969955	0.000384241	0.00889928
2310069G16Rik	99.272	58.4346	-0.764563	0.000393347	0.00898554
Gm10677	149.308	95.7702	-0.640644	0.000393051	0.00898554
St6galnac3	196.068	129.378	-0.599754	0.000417386	0.00940598
Mir1188	128.369	78.9914	-0.700529	0.000446169	0.0099207
Mir1927	23.0128	7.93469	-1.53619	0.00046262	0.0102185
Itga11	45.8679	22.2923	-1.04094	0.00046947	0.0103469
Mir222	49.4949	23.9689	-1.04612	0.000486989	0.0105474
Mir876	30.0641	12.3257	-1.28637	0.000490671	0.0106157
1700007J10Rik	91.3804	54.0243	-0.758276	0.000518429	0.0109791
Rab43	131.746	82.112	-0.68209	0.000523119	0.0110434
4930447A16Rik	99.0096	58.356	-0.762687	0.00053231	0.0111785
Otud3	192.308	126.948	-0.599174	0.000539491	0.0113056
4930469G21Rik	115.165	71.2889	-0.691949	0.000603982	0.0123372
D330050G23Rik	89.7746	52.6202	-0.770689	0.000610822	0.0124488
Mir7667	29.3821	12.1785	-1.27061	0.000614348	0.0124831
Tex15	50.3766	25.8545	-0.962335	0.000630895	0.0126647
Apobec4	88.2871	51.6335	-0.773894	0.00063488	0.0127192
4933416C03Rik	54.2823	27.7186	-0.96963	0.000643563	0.0128171
Cd163	44.8805	22.0141	-1.02766	0.000663887	0.0131686
Olfr690	14.8277	3.75795	-1.98028	0.000672718	0.0133054
Mir6336	15.2835	4.39392	-1.79839	0.000711804	0.0139397
Grip1os1	23.562	8.38157	-1.49117	0.000723019	0.0141071
C130046K22Rik	22.6432	7.95069	-1.50993	0.000733493	0.0142695
Gm5820	31.665	13.9948	-1.178	0.000741732	0.0143851
D630041G03Rik	183.442	122.552	-0.58193	0.000760209	0.0146161
Grip1os2	16.8164	4.95771	-1.76213	0.000764306	0.0146668
Gm19461	87.5996	52.7882	-0.730707	0.000781627	0.0148754
Dnah17	69.4665	38.6338	-0.846455	0.000813308	0.0153426
Mir341	167.172	111.083	-0.589694	0.000820669	0.0154378
Hdac8	144.475	94.473	-0.61285	0.000830949	0.0155727
Ammecr1	164.224	107.152	-0.61601	0.000835529	0.0156293
Igsf6	104.073	63.7132	-0.707927	0.000847723	0.0158131
Mir6989	40.5171	19.2322	-1.07501	0.000861021	0.0159867
Adarb2	119.975	77.5949	-0.628702	0.000888031	0.0162924
G530011O06Rik	54.7324	28.6404	-0.934344	0.000923305	0.0167854
Gm10754	36.2212	16.8709	-1.1023	0.000976079	0.0174443
Hacd4	166.254	110.624	-0.587723	0.00101222	0.0179274
Rmst	149.182	97.709	-0.610511	0.00105196	0.0184061
Mir466i	50.3359	26.5091	-0.925101	0.0010537	0.0184204
Ankef1	45.1293	22.5339	-1.00197	0.00108902	0.0188243
Nqo2	182.84	121.985	-0.583875	0.00111303	0.0190799
Cd93	80.713	48.3721	-0.738626	0.00112012	0.0191037
Teddm2	42.1905	21.1872	-0.993729	0.00114901	0.0194584
Ubap1l	47.6231	24.0622	-0.984893	0.00119614	0.0200867
Murc	75.2878	44.514	-0.758155	0.00122835	0.0204392
C130026L21Rik	79.8639	47.4395	-0.751453	0.00123521	0.020505
Fars2	118.188	75.6546	-0.643587	0.0012367	0.02051
Smok4a	28.7463	12.533	-1.19764	0.00129391	0.0212827
Gm15708	32.4363	14.8951	-1.12278	0.00132119	0.0216379
Ceacam2	67.2694	38.9103	-0.789798	0.00135677	0.0221168
AA413626	37.039	18.4527	-1.00521	0.00140375	0.0227102
Tbc1d22bos	37.9551	18.3288	-1.05019	0.00146283	0.023389
Mir344	12.1847	3.27427	-1.89583	0.00147747	0.0236041
Arhgap25	144.825	94.5301	-0.615463	0.00151352	0.0239889
Smim4	80.985	49.77	-0.70238	0.00156144	0.0245156
9330162B11Rik	28.6762	12.3797	-1.21187	0.00157693	0.024652
Rab11fip4os1	112.186	70.903	-0.661976	0.00157751	0.024652
2610037D02Rik	36.7707	18.0577	-1.02594	0.00160645	0.0249292
Tmc1	34.0956	16.0647	-1.08569	0.00161461	0.025017
Tshz2	149.606	98.0673	-0.609324	0.00161632	0.0250243
Gm10421	35.7384	17.3605	-1.04166	0.00161987	0.0250392
Tfpi	51.0343	27.204	-0.907651	0.00164282	0.025241
Yy2	143.031	94.7159	-0.59465	0.00173124	0.026216
Hsd3b3	22.2073	8.8044	-1.33474	0.00175259	0.0265192
L3mbtl4	37.2191	18.2761	-1.02609	0.00188068	0.0280348
Slc24a1	79.5572	48.8867	-0.70255	0.00191603	0.0283067
Adcy10	83.6241	51.7662	-0.691909	0.00192034	0.0283172
4930482G09Rik	20.82	7.74616	-1.42642	0.0019386	0.0284872
4933417G07Rik	53.7033	28.8037	-0.898755	0.00197218	0.0288219
Il5	12.1911	3.11963	-1.96638	0.00201621	0.0293126
Rcvrn	27.2218	11.7371	-1.21369	0.0020534	0.029681
Gm16982	100.714	65.2111	-0.627075	0.00220602	0.0314504
Tyw3	118.59	76.8863	-0.625188	0.00221241	0.0314574
Mir181b-2	14.2655	4.48533	-1.66924	0.00226334	0.0319547
Mirlet7a-1	107.402	70.6537	-0.604179	0.00231753	0.0325079
Impg2	61.2691	35.0351	-0.80636	0.00234446	0.0327538
B130024G19Rik	28.2421	12.5876	-1.16584	0.00235436	0.0328234
Ifit1bl2	36.6788	18.1899	-1.01181	0.00245357	0.0339233
Gm19557	48.8555	26.249	-0.896258	0.0025035	0.0344945
Ankrd61	66.843	39.7363	-0.750318	0.00257469	0.0351132
1700007F19Rik	96.4316	60.8872	-0.663368	0.00259983	0.0353358
Msrb3	120.947	80.5514	-0.586397	0.00268418	0.0361877
Pla2g4d	8.75664	1.86147	-2.23394	0.00274315	0.0367749
Notch3	65.3646	38.995	-0.745221	0.00279985	0.037345
C7	93.8172	58.8171	-0.673618	0.00280643	0.037383
Adam1b	42.4211	22.8534	-0.892374	0.00286445	0.0379403
0610043K17Rik	86.1514	53.9324	-0.675721	0.00288224	0.038114
Eqtn	76.8348	46.9796	-0.709727	0.00292853	0.0385734
Tmem164	125.036	83.5158	-0.582219	0.00294383	0.0387241
4921511C10Rik	84.879	52.2832	-0.699059	0.00296862	0.0389274
Hsd3b1	15.0607	5.13271	-1.553	0.00297317	0.0389274
Mirlet7e	32.7668	16.128	-1.02267	0.00301636	0.0393325
Itgbl1	131.788	87.5737	-0.589646	0.00306145	0.0398525
Chdh	112.676	74.3395	-0.599974	0.00322264	0.0414658
Muc5b	49.6444	27.154	-0.870467	0.00328106	0.0420018
Morn1	112.807	74.7387	-0.593929	0.00329604	0.0421396
Gm5464	94.9035	60.8884	-0.640294	0.00330196	0.0421731
1700110C19Rik	46.3356	25.1285	-0.8828	0.00339751	0.0429708
D030068K23Rik	65.0265	38.7458	-0.746988	0.00361525	0.0450423
Hsd3b6	11.2043	3.03136	-1.88601	0.00364056	0.045217
Sox5os3	11.3142	3.04187	-1.89511	0.00373177	0.046111
Fhitos	6.10387	0.688551	-3.14809	0.00381924	0.0468093
4933428C19Rik	12.8262	3.77093	-1.76611	0.00390188	0.0475489
Gm15408	55.6509	31.9103	-0.802385	0.00393062	0.047775
A930012L18Rik	67.951	41.0293	-0.727841	0.00394692	0.0477902
Msrb2	71.5827	44.6194	-0.68194	0.00394535	0.0477902
Tnk2os	41.746	22.2964	-0.904827	0.00397552	0.0480951
4932441J04Rik	18.8858	7.54186	-1.32431	0.0039852	0.0481831
5730422E09Rik	56.6838	31.997	-0.825	0.00405775	0.048854
Svopl	24.6482	11.2267	-1.13454	0.00409529	0.0491876
