# Supplementary material for: INTACT vs. FANS for Cell-Type-Specific Nuclei Sorting: A Comprehensive Qualitative and Quantitative Comparison
Source: Int J Mol Sci. 2021 May 19;22(10):5335. doi: 10.3390/ijms22105335 (PMC8159132; doi:10.3390/ijms22105335)
Supplement: Supplementary file 1 [file ijms-22-05335-s001.zip › Supplementary Table S3 - Differentially Accessible Region.xlsx]

## Sheet: FANSvsINTACT_DAR
Chr	Start	End	Strand	Peak Score	Focus Ratio/Region Size	Annotation	Detailed Annotation	Distance to TSS	Nearest PromoterID	Entrez ID	Nearest Unigene	Nearest Refseq	Nearest Ensembl	Gene Name	Gene Alias	Gene Description	Gene Type
chr17	27385461	27386550	+	0	NA	Intergenic	Intergenic	27908	NR_106077	102466228		NR_106077	ENSMUSG00000106215	Mir7218	mmu-mir-7218	microRNA 7218	ncRNA
chr7	130815473	130816270	+	0	NA	intron (NM_001081038, intron 11 of 15)	intron (NM_001081038, intron 11 of 15)	41802	NM_001081038	330660	Mm.271550	NM_001081038	ENSMUSG00000040298	Btbd16	E330040A16Rik	BTB (POZ) domain containing 16	protein-coding
chr14	23735063	23735655	+	0	NA	intron (NM_001253374, intron 1 of 28)	intron (NM_001253374, intron 1 of 28)	268846	NM_001253369	16531	Mm.343607	NM_010610	ENSMUSG00000063142	Kcnma1	5730414M22Rik|BKCa|MaxiK|Slo|Slo1|mSlo|mSlo1	potassium large conductance calcium-activated channel, subfamily M, alpha member 1	protein-coding
chr1	104908678	104909058	+	0	NA	intron (NM_011800, intron 1 of 11)	B4A|SINE|B4	140348	NM_011800	23836	Mm.103640	NM_011800	ENSMUSG00000050840	Cdh20	Cdh7	cadherin 20	protein-coding
chr7	80602439	80602995	+	0	NA	intron (NM_173863, intron 9 of 14)	intron (NM_173863, intron 9 of 14)	-33300	NR_040343	100504375	Mm.322881	NR_040343	ENSMUSG00000084821	Gm15880	-	predicted gene 15880	ncRNA
chr4	153547803	153548341	+	0	NA	Intergenic	Intergenic	-65242	NM_001099299	230959	Mm.318874	NM_001099299	ENSMUSG00000039546	Ajap1	Gm573	adherens junction associated protein 1	protein-coding
chr1	90789383	90789901	+	0	NA	intron (NM_001243008, intron 23 of 43)	intron (NM_001243008, intron 23 of 43)	54329	NM_001243008	12835	Mm.7562	NM_009935	ENSMUSG00000048126	Col6a3	AI507288|Col6a-3	collagen, type VI, alpha 3	protein-coding
chr15	80797812	80798876	+	0	NA	promoter-TSS (NM_177124)	promoter-TSS (NM_177124)	-266	NM_177124	213988	Mm.131328	NM_144812	ENSMUSG00000047888	Tnrc6b	2700090M07Rik|A730065C02Rik|AI848765|D230019K20Rik	trinucleotide repeat containing 6b	protein-coding
chr9	27706563	27707016	+	0	NA	Intergenic	Intergenic	309577	NM_001305058	75469	Mm.45824	NM_029299	ENSMUSG00000031991	Spata19	1700001L23Rik|AV047838|spergen-1	spermatogenesis associated 19	protein-coding
chr8	60054832	60055594	+	0	NA	Intergenic	Intergenic	229564	NR_126087	75017	Mm.60775	NR_126087	ENSMUSG00000110406	4930470O06Rik	-	RIKEN cDNA 4930470O06 gene	ncRNA
chr9	108815439	108816073	+	0	NA	intron (NM_030729, intron 12 of 12)	intron (NM_030729, intron 12 of 12)	7376	NM_030729	80987	Mm.192416	NM_030729	ENSMUSG00000032598	Nckipsd	AF3P21|DIP1|ORF1|SPIN90|WASLBP|WISH|Wasbp	NCK interacting protein with SH3 domain	protein-coding
chr5	85636686	85637488	+	0	NA	Intergenic	Intergenic	428496	NM_001345904	12617	Mm.4649	NM_007683	ENSMUSG00000029253	Cenpc1	CENP-C|Cenpc	centromere protein C1	protein-coding
chr18	35751671	35752571	+	0	NA	Intergenic	Intergenic	-11567	NM_028261	72512	Mm.45995	NM_028261	ENSMUSG00000024349	Tmem173	2610307O08Rik|ERIS|MPYS|Mita|STING|STING-beta	transmembrane protein 173	protein-coding
chr12	86826828	86827517	+	0	NA	Intergenic	Intergenic	57642	NM_145836	238330	Mm.248358	NM_145836	ENSMUSG00000034168	Irf2bpl	6430527G18Rik|Eap1	interferon regulatory factor 2 binding protein-like	protein-coding
chr5	62041249	62041846	+	0	NA	Intergenic	Intergenic	232704	NM_019468	14380	Mm.347430	NM_019468	ENSMUSG00000089992	G6pd2	G6pdx-ps1|Gpd-2|Gpd2	glucose-6-phosphate dehydrogenase 2	protein-coding
chr2	5641636	5642011	+	0	NA	intron (NM_001290374, intron 1 of 9)	intron (NM_001290374, intron 1 of 9)	34223	NM_001290376	227541	Mm.191949	NM_177343	ENSMUSG00000039145	Camk1d	A630059D12Rik|CKLiK|CaMKIdelta|E030025C11Rik|mCKLiK	calcium/calmodulin-dependent protein kinase ID	protein-coding
chr15	85821185	85822225	+	0	NA	promoter-TSS (NM_011105)	promoter-TSS (NM_011105)	28	NM_011105	18766	Mm.89965	NM_011105	ENSMUSG00000052496	Pkdrej	-	polycystin (PKD) family receptor for egg jelly	protein-coding
chr14	31392485	31393542	+	0	NA	intron (NM_011894, intron 3 of 8)	intron (NM_011894, intron 3 of 8)	24664	NM_001347585	24056	Mm.383198	NM_011894	ENSMUSG00000021892	Sh3bp5	AI606498|SH3BP-5|Sab	SH3-domain binding protein 5 (BTK-associated)	protein-coding
chr13	54557553	54558019	+	0	NA	intron (NM_001252648, intron 1 of 4)	intron (NM_001252648, intron 1 of 4)	7596	NM_133797	97820	Mm.24593	NM_133797	ENSMUSG00000025871	4833439L19Rik	4930558H15Rik|C81457|Kiaa1191|P33monox	RIKEN cDNA 4833439L19 gene	protein-coding
chr7	128178210	128178896	+	0	NA	intron (NM_001029872, intron 5 of 30)	intron (NM_001029872, intron 5 of 30)	4607	NM_001029872	381924	Mm.334257	NM_001029872	ENSMUSG00000070369	Itgad	Cd11d	integrin, alpha D	protein-coding
chr13	19133772	19134339	+	0	NA	intron (NM_001289546, intron 17 of 20)	intron (NM_001289546, intron 17 of 20)	185704	NM_001289546	218038	Mm.101650	NM_175007	ENSMUSG00000021314	Amph	-	amphiphysin	protein-coding
chr1	115773475	115774258	+	0	NA	intron (NM_001371013, intron 1 of 23)	intron (NM_001371013, intron 1 of 23)	89129	NM_001371013
chr10	44945216	44945786	+	0	NA	Intergenic	Intergenic	-121715	NM_011156	19072	Mm.37294	NM_011156	ENSMUSG00000019849	Prep	AI047692|AI450383|D10Wsu136e|PE|PEP|Pop	prolyl endopeptidase	protein-coding
chr2	165832284	165832746	+	0	NA	intron (NM_001363020, intron 10 of 22)	intron (NM_001363020, intron 10 of 22)	25658	NM_001252585	228880	Mm.227598	NM_027230	ENSMUSG00000039671	Zmynd8	1110013E22Rik|2010005I16Rik|3632413B07Rik|AI316811|AL024039|Prkcbp1|RACK7	zinc finger, MYND-type containing 8	protein-coding
chr19	4680384	4680746	+	0	NA	intron (NM_001033447, intron 3 of 14)	intron (NM_001033447, intron 3 of 14)	18103	NM_001033447	381196	Mm.297789	NM_001033447	ENSMUSG00000071691	Gm960	TOPOVIBL|Top6bl	predicted gene 960	protein-coding
chr5	125222659	125223189	+	0	NA	Intergenic	Intergenic	-43710	NM_011424	20602	Mm.278646	NM_011424	ENSMUSG00000029478	Ncor2	N-CoR|SMRT|SMRTe	nuclear receptor co-repressor 2	protein-coding
chr10	50199839	50200394	+	0	NA	Intergenic	Intergenic	-392553	NM_198007	77987	Mm.222497	NM_198007	ENSMUSG00000038774	Ascc3	ASC1p200|B630009I04Rik|BC023451|D430001L07Rik|D630041L21|Helic1|RNAH	activating signal cointegrator 1 complex subunit 3	protein-coding
chr5	61971897	61972348	+	0	NA	Intergenic	Intergenic	163279	NM_019468	14380	Mm.347430	NM_019468	ENSMUSG00000089992	G6pd2	G6pdx-ps1|Gpd-2|Gpd2	glucose-6-phosphate dehydrogenase 2	protein-coding
chr11	107479172	107479905	+	0	NA	promoter-TSS (NM_025894)	promoter-TSS (NM_025894)	10	NM_025894	66997	Mm.491171	NM_025894	ENSMUSG00000020720	Psmd12	1500002F15Rik|AI480719|P55	proteasome (prosome, macropain) 26S subunit, non-ATPase, 12	protein-coding
chr11	78771496	78772248	+	0	NA	Intergenic	Intergenic	-20143	NM_197989	69109	Mm.341420	NM_197989	ENSMUSG00000049489	Ccnq	1810009O10Rik|Fam58a|Fam58b	cyclin Q	protein-coding
chr14	81469010	81469448	+	0	NA	Intergenic	Intergenic	1468927	NM_001351947	380924	Mm.26456	NM_001030294	ENSMUSG00000022026	Olfm4	GC1|GW112|Gm296|Gm913|OlfD|pPD4	olfactomedin 4	protein-coding
chr16	6018539	6019303	+	0	NA	intron (NM_001359725, intron 1 of 16)	intron (NM_001359725, intron 1 of 16)	43334	NR_045799	68238	Mm.434605	NR_045799	ENSMUSG00000101481	1700123O21Rik	-	RIKEN cDNA 1700123O21 gene	ncRNA
chr8	11414066	11414709	+	0	NA	intron (NM_009932, intron 17 of 47)	intron (NM_009932, intron 17 of 47)	-63542	NR_126558	102132	Mm.37632	NR_126558	ENSMUSG00000096957	E230013L22Rik	AI645545	RIKEN cDNA E230013L22 gene	ncRNA
chr2	154435982	154437049	+	0	NA	promoter-TSS (NM_009823)	promoter-TSS (NM_009823)	31	NM_009823	12396	Mm.29914	NM_009823	ENSMUSG00000038533	Cbfa2t2	A430091M07|C330013D05Rik|Cbfa2t2h|MTGR1	CBFA2/RUNX1 translocation partner 2	protein-coding
chr10	81292567	81293559	+	0	NA	promoter-TSS (NM_001146687)	promoter-TSS (NM_001146687)	100	NM_001293647	18717	Mm.24222	NM_008844	ENSMUSG00000034902	Pip5k1c	AI115456|AI835305|Pip5kIgamma	phosphatidylinositol-4-phosphate 5-kinase, type 1 gamma	protein-coding
chrX	155161184	155161661	+	0	NA	Intergenic	MTA_Mm-int|LTR|ERVL-MaLR	-13573	NM_001081671	73347	Mm.63848	NM_028511	ENSMUSG00000057402	Cldn34b2	1700042B14Rik	claudin 34B2	protein-coding
chr3	63410673	63412083	+	0	NA	Intergenic	HAL1|LINE|L1	-27873	NR_153189	102637430	Mm.209619	NR_153189	ENSMUSG00000104336	Gm34240	-	predicted gene, 34240	ncRNA
chr3	10685066	10686384	+	0	NA	Intergenic	Intergenic	-245595	NM_001127191	74718	Mm.440548	NM_029068	ENSMUSG00000027534	Snx16	4930522N22Rik|AI117577|AI747675	sorting nexin 16	protein-coding
chr19	4481299	4482405	+	0	NA	Intergenic	Intergenic	-4709	NM_134164	171180	Mm.262270	NM_134164	ENSMUSG00000049303	Syt12	-	synaptotagmin XII	protein-coding
chr6	101650482	101651149	+	0	NA	Intergenic	Intergenic	-123434	NR_027989	207157	Mm.57632	NM_177579	ENSMUSG00000052236	Gm9871	0610005I04|EG207157	predicted gene 9871	ncRNA
chr6	129423244	129424086	+	0	NA	3' UTR (NM_001205364, exon 6 of 6)	3' UTR (NM_001205364, exon 6 of 6)	14803	NM_001205365	232414	Mm.391518	NM_172732	ENSMUSG00000046080	Clec9a	9830005G06Rik|DNGR-1	C-type lectin domain family 9, member a	protein-coding
chr4	139336987	139337340	+	0	NA	Intergenic	Intergenic	15413	NM_001356476	69902	Mm.27871	NM_023536	ENSMUSG00000028741	Mrto4	2610012O22Rik|Mg684|Mrt4	mRNA turnover 4, ribosome maturation factor	protein-coding
chr12	56636709	56637703	+	0	NA	Intergenic	Intergenic	-23922	NM_008701	18094	Mm.129420	NM_008701	ENSMUSG00000058669	Nkx2-9	Nkx-2.9|Nkx2-8|Nkx2.9|tinman	NK2 homeobox 9	protein-coding
chr11	61227923	61228269	+	0	NA	intron (NR_138545, intron 10 of 10)	intron (NR_138545, intron 10 of 10)	19354	NM_007436	11670	Mm.4257	NM_007436	ENSMUSG00000019102	Aldh3a1	Ahd-4|Ahd4|Aldh|Aldh3	aldehyde dehydrogenase family 3, subfamily A1	protein-coding
chr5	143287794	143288260	+	0	NA	exon (NM_001370826, exon 3 of 3)	exon (NM_001370826, exon 3 of 3)	5507	NM_001370826	330230		NM_001370826	ENSMUSG00000093910	Zfp853	Gm792	zinc finger protein 853	protein-coding
chr9	106327278	106328048	+	0	NA	intron (NM_027354, intron 9 of 10)	intron (NM_027354, intron 9 of 10)	-40969	NM_153459	235584	Mm.275584	NM_153459	ENSMUSG00000053716	Dusp7	AU015694|Mkpx|Pyst2	dual specificity phosphatase 7	protein-coding
chr12	7253492	7254662	+	0	NA	Intergenic	Intergenic	126253	NR_045045	73575	Mm.179463	NR_045045	ENSMUSG00000102096	1700101O22Rik	-	RIKEN cDNA 1700101O22 gene	ncRNA
chr7	125117177	125117572	+	0	NA	Intergenic	MER102b|DNA|hAT-Charlie	232412	NR_045803	71208	Mm.159465	NM_172408	ENSMUSG00000045928	4933440M02Rik	-	RIKEN cDNA 4933440M02 gene	ncRNA
chr18	70168778	70169542	+	0	NA	Intergenic	Intergenic	-27555	NM_001082553	80718	Mm.246753	NM_030554	ENSMUSG00000024511	Rab27b	2310021G14Rik|B130064M09Rik	RAB27B, member RAS oncogene family	protein-coding
chr8	121675094	121675958	+	0	NA	Intergenic	MLT1C|LTR|ERVL-MaLR	-23593	NM_080855	142682	Mm.103202	NM_080855	ENSMUSG00000061410	Zcchc14	AA792890|BDG29	zinc finger, CCHC domain containing 14	protein-coding
chr9	22064264	22064755	+	0	NA	intron (NM_177318, intron 3 of 8)	intron (NM_177318, intron 3 of 8)	-6493	NR_040406	100503652	Mm.439941	NR_040406	ENSMUSG00000096981	Gm16845	-	predicted gene, 16845	ncRNA
chr16	77255196	77255699	+	0	NA	Intergenic	Lx5c|LINE|L1	-73881	NR_015543	77994	Mm.394688	NR_015543	ENSMUSG00000090386	Mir99ahg	2810055G20Rik|D730043B02Rik	Mir99a and Mirlet7c-1 host gene (non-protein coding)	ncRNA
chr15	78436500	78438316	+	0	NA	intron (NM_001289671, intron 6 of 7)	intron (NM_001289671, intron 6 of 7)	8844	NR_110357	72844	Mm.390816	NM_001081367	ENSMUSG00000033287	Kctd17	2900008M13Rik|AA414907|AW742389|N28155	potassium channel tetramerisation domain containing 17	protein-coding
chr4	28143064	28143640	+	0	NA	Intergenic	Intergenic	-669779	NM_010141	13841	Mm.257266	NM_010141	ENSMUSG00000028289	Epha7	Cek11|Ebk|Ehk3|Hek11|Mdk1	Eph receptor A7	protein-coding
chr1	113992271	113993000	+	0	NA	Intergenic	Intergenic	-1575717	NR_157044	102635484		NR_157044		Gm32810	Gm18406	predicted gene, 32810	ncRNA
chr14	115475358	115475836	+	0	NA	intron (NM_175500, intron 5 of 7)	intron (NM_175500, intron 5 of 7)	-66045	NR_045761	75088	Mm.444706	NR_045761	ENSMUSG00000093551	4930505G20Rik	-	RIKEN cDNA 4930505G20 gene	ncRNA
chr14	64165403	64165679	+	0	NA	intron (NM_001347639, intron 5 of 5)	intron (NM_001347639, intron 5 of 5)	61218	NM_028525	73382	Mm.481055	NM_028525	ENSMUSG00000021966	Prss52	1700049K14Rik|Tesp3	protease, serine 52	protein-coding
chr11	53299872	53300990	+	0	NA	promoter-TSS (NM_008300)	promoter-TSS (NM_008300)	48	NM_008300	15525	Mm.239865	NM_008300	ENSMUSG00000020361	Hspa4	70kDa|AI317151|APG-2|Hsp110|Hsp70RY|mKIAA4025	heat shock protein 4	protein-coding
chr15	82236686	82237220	+	0	NA	intron (NM_178269, intron 4 of 4)	intron (NM_178269, intron 4 of 4)	7383	NM_001080158	66570	Mm.23596	NM_025639	ENSMUSG00000068101	Cenpm	2610019I03Rik|AI853711|Pane1	centromere protein M	protein-coding
chr14	87745190	87745729	+	0	NA	Intergenic	Intergenic	328876	NM_001253755	219249	Mm.35168	NM_172605	ENSMUSG00000022019	Tdrd3	4732418C03Rik|6720468N18	tudor domain containing 3	protein-coding
chr7	44916923	44918434	+	0	NA	intron (NM_001077264, intron 1 of 22)	intron (NM_001077264, intron 1 of 22)	11812	NM_001077264	11771	Mm.6877	NM_007458	ENSMUSG00000060279	Ap2a1	Adtaa	adaptor-related protein complex 2, alpha 1 subunit	protein-coding
chrX	63463275	63463803	+	0	NA	Intergenic	MLTR25A|LTR|ERVK	688659	NM_001177377	627470	Mm.233605	NM_001177377	ENSMUSG00000079579	Gm6760	EG627470	predicted gene 6760	protein-coding
chr13	5456842	5457278	+	0	NA	Intergenic	Intergenic	401032	NR_045891	71867	Mm.179181	NR_045891	ENSMUSG00000100625	1700016G22Rik	-	RIKEN cDNA 1700016G22 gene	ncRNA
chr11	13495855	13496768	+	0	NA	Intergenic	Intergenic	682730	NR_131011	75280	Mm.108492	NR_131011	ENSMUSG00000085452	4930554G24Rik	-	RIKEN cDNA 4930554G24 gene	ncRNA
chr7	112022635	112024204	+	0	NA	promoter-TSS (NM_133758)	promoter-TSS (NM_133758)	-87	NM_001357952	74996	Mm.16974	NM_133758	ENSMUSG00000059263	Usp47	4930502N04Rik|A630020C16Rik	ubiquitin specific peptidase 47	protein-coding
chr6	65380899	65381598	+	0	NA	promoter-TSS (NM_175524)	promoter-TSS (NM_175524)	-46	NM_175524	243407	Mm.389758	NM_175524	ENSMUSG00000029917	Qrfprl	C130060K24Rik	pyroglutamylated RFamide peptide receptor like	protein-coding
chr16	20548096	20548976	+	0	NA	promoter-TSS (NM_013852)	promoter-TSS (NM_013852)	20	NR_030670	100042948	Mm.406754	NR_030670	ENSMUSG00000080797	Gm15760	-	mitochondrial ribosomal protein S18B pseudogene	pseudo
chr18	52569959	52571231	+	0	NA	Intergenic	Intergenic	-40728	NM_001286182	16948	Mm.172	NM_010728	ENSMUSG00000024529	Lox	AI893619|TSC-160|rrg	lysyl oxidase	protein-coding
chr12	55983502	55984268	+	0	NA	Intergenic	Intergenic	147519	NM_001037756	52592	Mm.24761	NM_027867	ENSMUSG00000012076	Brms1l	0710008O11Rik|AI159718|BRMS1|D12Ertd407e	breast cancer metastasis-suppressor 1-like	protein-coding
chr10	106195230	106195767	+	0	NA	Intergenic	LTR75|LTR|ERVL	-274812	NM_001359676	327814	Mm.391424	NM_177373	ENSMUSG00000053825	Ppfia2	5330438O12|B230207K17Rik|E130120L08Rik|mKIAA4112	protein tyrosine phosphatase, receptor type, f polypeptide (PTPRF), interacting protein (liprin), alpha 2	protein-coding
chr11	77825663	77826288	+	0	NA	intron (NM_001291212, intron 15 of 40)	intron (NM_001291212, intron 15 of 40)	24677	NM_001291214	360013	Mm.341248	NM_011586	ENSMUSG00000000631	Myo18a	MAJN|MyoPDZ|MysPDZ|SP-R210	myosin XVIIIA	protein-coding
chr15	10969853	10970619	+	0	NA	intron (NM_030888, intron 3 of 5)	intron (NM_030888, intron 3 of 5)	-11520	NM_008537	17117	Mm.2787	NM_008537	ENSMUSG00000022244	Amacr	Macr1	alpha-methylacyl-CoA racemase	protein-coding
chr1	139376664	139377311	+	0	NA	promoter-TSS (NM_133239)	promoter-TSS (NM_133239)	89	NM_133239	170788	Mm.95700	NM_133239	ENSMUSG00000063681	Crb1	7530426H14Rik|A930008G09Rik	crumbs family member 1, photoreceptor morphogenesis associated	protein-coding
chr2	26380126	26380905	+	0	NA	intron (NM_172339, intron 1 of 22)	CpG	138	NM_001290419	227644	Mm.207460	NM_172339	ENSMUSG00000036281	Snapc4	5730436L13Rik	small nuclear RNA activating complex, polypeptide 4	protein-coding
chr11	60927356	60927800	+	0	NA	intron (NR_027800, intron 1 of 1)	intron (NR_027800, intron 1 of 1)	4289	NR_027800	24082	Mm.46270	NM_025293	ENSMUSG00000042549	Map2k3os	F3-1|Gm16516|Gtlf3a	mitogen-activated protein kinase kinase 3, opposite strand	ncRNA
chr7	15980065	15980977	+	0	NA	intron (NM_001081418, intron 6 of 13)	intron (NM_001081418, intron 6 of 13)	-12986	NM_153068	259300	Mm.138215	NM_153068	ENSMUSG00000074364	Ehd2	BC027084|C130052H20Rik	EH-domain containing 2	protein-coding
chr4	135876561	135877023	+	0	NA	Intergenic	Intergenic	-2946	NM_026383	52830	Mm.29159	NM_026383	ENSMUSG00000028675	Pnrc2	0610011E17Rik|D4Bwg0593e	proline-rich nuclear receptor coactivator 2	protein-coding
chr9	42054454	42055692	+	0	NA	intron (NM_001357261, intron 7 of 42)	intron (NM_001357261, intron 7 of 42)	22140	NM_001357261	20660	Mm.121920	NM_011436	ENSMUSG00000049313	Sorl1	2900010L19Rik|AI596264|AW261561|LR11|SorLA|gp250|mSorLA	sortilin-related receptor, LDLR class A repeats-containing	protein-coding
chr2	180530032	180530567	+	0	NA	intron (NM_018766, intron 1 of 3)	intron (NM_018766, intron 1 of 3)	30323	NM_018766	18216	Mm.301712	NM_018766	ENSMUSG00000027568	Ntsr1	NT-1R|NTR-1|NTR1	neurotensin receptor 1	protein-coding
chr10	80842284	80842842	+	0	NA	intron (NM_001013758, intron 1 of 1)	intron (NM_001013758, intron 1 of 1)	1235	NM_001359746	237403	Mm.40213	NM_001013758	ENSMUSG00000051067	Lingo3	AI851712|LERN2	leucine rich repeat and Ig domain containing 3	protein-coding
chr2	110599801	110600509	+	0	NA	intron (NM_001003915, intron 1 of 14)	intron (NM_001003915, intron 1 of 14)	2856	NM_001003915	241612	Mm.277148	NM_001003915	ENSMUSG00000041644	Slc5a12	AI315119|D630015G19|SMCT2	solute carrier family 5 (sodium/glucose cotransporter), member 12	protein-coding
chr5	110521848	110522165	+	0	NA	intron (NR_102290, intron 1 of 2)	intron (NR_102290, intron 1 of 2)	7083	NR_102290	231603	Mm.22836	NM_173766	ENSMUSG00000048215	A630023P12Rik	-	RIKEN cDNA A630023P12 gene	ncRNA
chr1	151034928	151035417	+	0	NA	Intergenic	Intergenic	-41737	NM_001024720	545370	Mm.379425	NM_001024720	ENSMUSG00000066842	Hmcn1	EG545370|FIBL-6|Gm201	hemicentin 1	protein-coding
chr12	86810682	86811307	+	0	NA	Intergenic	Intergenic	73820	NM_145836	238330	Mm.248358	NM_145836	ENSMUSG00000034168	Irf2bpl	6430527G18Rik|Eap1	interferon regulatory factor 2 binding protein-like	protein-coding
chr11	120894413	120895110	+	0	NA	intron (NM_027745, intron 9 of 18)	intron (NM_027745, intron 9 of 18)	38111	NM_027745	71276	Mm.275751	NM_027745	ENSMUSG00000048445	Ccdc57	4933434G05Rik	coiled-coil domain containing 57	protein-coding
chr5	129657962	129658391	+	0	NA	exon (NM_172462, exon 3 of 3)	exon (NM_172462, exon 3 of 3)	11912	NM_172462	22648	Mm.135067	NM_172462	ENSMUSG00000051034	Zfp11	6720465D24|Krox-6|Zfp-11	zinc finger protein 11	protein-coding
chr11	103381540	103382459	+	0	NA	intron (NM_183034, intron 5 of 11)	intron (NM_183034, intron 5 of 11)	-18307	NM_001205236	544817	Mm.259113	NM_133715	ENSMUSG00000034255	Arhgap27	2310069I04Rik|5730442P18Rik|Gm21552|Sh3d20	Rho GTPase activating protein 27	protein-coding
chr1	91865885	91866419	+	0	NA	Intergenic	MT2A|LTR|ERVL	64691	NM_007855	13345	Mm.9474	NM_007855	ENSMUSG00000007805	Twist2	Dermo1|bHLHa39	twist basic helix-loop-helix transcription factor 2	protein-coding
chr9	47749135	47749656	+	0	NA	intron (NM_001025600, intron 1 of 8)	intron (NM_001025600, intron 1 of 8)	68813	NR_046048	100038460	Mm.447649	NR_046048		Gm10677	-	predicted gene 10677	ncRNA
chr5	84264983	84266150	+	0	NA	intron (NM_007937, intron 3 of 15)	intron (NM_007937, intron 3 of 15)	151816	NM_007937	13839	Mm.137991	NM_007937	ENSMUSG00000029245	Epha5	AI854630|AW125296|Cek7|Ehk1|Els1|Hek7|Rek7|bsk	Eph receptor A5	protein-coding
chr7	44353135	44353941	+	0	NA	exon (NM_001034115, exon 24 of 25)	exon (NM_001034115, exon 24 of 25)	21492	NM_027049	69349	Mm.358922	NM_027049	ENSMUSG00000008028	1700008O03Rik	-	RIKEN cDNA 1700008O03 gene	protein-coding
chr11	103206116	103206474	+	0	NA	intron (NM_001254724, intron 1 of 9)	L1MC1|LINE|L1	2253	NM_001254724	69441	Mm.380648	NM_027082	ENSMUSG00000020940	1700023F06Rik	-	RIKEN cDNA 1700023F06 gene	protein-coding
chr4	65086629	65087425	+	0	NA	Intergenic	Intergenic	-37147	NM_021362	18491	Mm.317854	NM_021362	ENSMUSG00000028370	Pappa	8430414N03Rik|IGFBP-4ase|PAG1|PAPP-A	pregnancy-associated plasma protein A	protein-coding
chr12	110932494	110933250	+	0	NA	exon (NM_001289510, exon 9 of 20)	exon (NM_001289510, exon 9 of 20)	43608	NM_001289510	104859	Mm.35583	NM_175336	ENSMUSG00000021275	Tecpr2	4930573I19Rik|AI604920|mKIAA0297	tectonin beta-propeller repeat containing 2	protein-coding
chr16	69134465	69134869	+	0	NA	Intergenic	L1_Mus4|LINE|L1	665714	NR_130991	78110	Mm.211406	NR_130991	ENSMUSG00000107073	4930428D20Rik	Gm43265	RIKEN cDNA 4930428D20 gene	ncRNA
chr18	48551306	48551889	+	0	NA	Intergenic	Intergenic	506262	NM_001025388	433182	Mm.70666	NM_001025388	ENSMUSG00000059040	Eno1b	EG433182|Eno-1|Eno1|Gm5506|NNE	enolase 1B, retrotransposed	protein-coding
chr11	78278353	78278695	+	0	NA	intron (NM_001002004, intron 24 of 38)	intron (NM_001002004, intron 24 of 38)	-12317	NM_001287206	216976	Mm.477146	NM_001045522		Rskr	BC037104|Sgk494	ribosomal protein S6 kinase related	protein-coding
chr18	17471740	17472300	+	0	NA	Intergenic	Charlie8|DNA|hAT-Charlie	108970	NR_045374	75162	Mm.60874	NR_045374	ENSMUSG00000117615	4930545E07Rik	-	RIKEN cDNA 4930545E07 gene	ncRNA
chr8	121107814	121108662	+	0	NA	5' UTR (NM_172761, exon 1 of 8)	5' UTR (NM_172761, exon 1 of 8)	141	NM_172761	234814	Mm.31690	NM_172761	ENSMUSG00000031816	Mthfsd	AW049977|BC052066|C920004D05	methenyltetrahydrofolate synthetase domain containing	protein-coding
chr18	21453271	21453852	+	0	NA	Intergenic	Intergenic	-153422	NM_001033445	381126	Mm.312276	NM_001033445	ENSMUSG00000042680	Garem1	C86169|Fam59a|Garem|Gm944|mKIAA4238	GRB2 associated regulator of MAPK1 subtype 1	protein-coding
chr5	143731811	143732933	+	0	NA	promoter-TSS (NM_029749)	promoter-TSS (NM_029749)	-92	NM_029749	76800	Mm.259620	NM_029749	ENSMUSG00000051306	Usp42	2410140K03Rik|3110031A07Rik|A630018G05Rik|D5Ertd591e	ubiquitin specific peptidase 42	protein-coding
chr3	75618379	75619131	+	0	NA	intron (NM_001357514, intron 4 of 8)	intron (NM_001357514, intron 4 of 8)	36976	NR_040539	69193	Mm.374088	NR_040539	ENSMUSG00000099370	Platr10	2410007B07Rik	pluripotency associated transcript 10	ncRNA
chr6	46348067	46348624	+	0	NA	intron (NM_001004357, intron 11 of 23)	intron (NM_001004357, intron 11 of 23)	-896051	NM_025771	66797	Mm.440084	NM_025771	ENSMUSG00000039419	Cntnap2	5430425M22Rik|Caspr2|mKIAA0868	contactin associated protein-like 2	protein-coding
chr5	113852491	113852855	+	0	NA	intron (NM_011779, intron 3 of 10)	intron (NM_011779, intron 3 of 10)	-22172	NM_009151	20345	Mm.332590	NM_009151	ENSMUSG00000048163	Selplg	CD162|Psgl-1|Psgl1|Selp1|Selpl	selectin, platelet (p-selectin) ligand	protein-coding
chr7	16285954	16286936	+	0	NA	intron (NM_001136471, intron 1 of 13)	CpG	350	NM_001136471	243846	Mm.482401	NM_172297	ENSMUSG00000041375	Ccdc9	2600011L02Rik	coiled-coil domain containing 9	protein-coding
chr6	58603447	58603928	+	0	NA	intron (NM_011920, intron 1 of 15)	intron (NM_011920, intron 1 of 15)	7015	NM_011920	26357	Mm.333096	NM_011920	ENSMUSG00000029802	Abcg2	ABC15|ABCP|AI428558|BCRP|Bcrp1|MXR|MXR1	ATP binding cassette subfamily G member 2 (Junior blood group)	protein-coding
chr9	44691194	44692570	+	0	NA	intron (NM_153537, intron 20 of 21)	intron (NM_153537, intron 20 of 21)	18649	NM_001277847	58866	Mm.45380	NM_021481	ENSMUSG00000032098	Treh	2210412M19Rik	trehalase (brush-border membrane glycoprotein)	protein-coding
chr3	128846227	128846995	+	0	NA	Intergenic	Intergenic	-353267	NM_011098	18741	Mm.246804	NM_011098	ENSMUSG00000028023	Pitx2	9430085M16Rik|Brx1|Brx1b|Munc30|Otlx2|Ptx2|Rieg	paired-like homeodomain transcription factor 2	protein-coding
chr7	144210523	144210927	+	0	NA	intron (NM_001113373, intron 4 of 15)	intron (NM_001113373, intron 4 of 15)	35265	NM_001113373	210274	Mm.483624	NM_001081370	ENSMUSG00000037541	Shank2	ProSAP1|mKIAA1022	SH3 and multiple ankyrin repeat domains 2	protein-coding
chr18	30783938	30784497	+	0	NA	Intergenic	Intergenic	511352	NR_151699	225326	Mm.194127	NM_181414	ENSMUSG00000033628	Pik3c3	5330434F23Rik|Vps34	phosphatidylinositol 3-kinase catalytic subunit type 3	protein-coding
chr2	100910488	100911516	+	0	NA	Intergenic	Intergenic	710044	NM_001362687	68170	Mm.31263	NM_026592	ENSMUSG00000027165	B230118H07Rik	NWC	RIKEN cDNA B230118H07 gene	protein-coding
chr11	51647042	51647589	+	0	NA	intron (NM_145974, intron 1 of 4)	intron (NM_145974, intron 1 of 4)	-3639	NR_027958	97775	Mm.220299	NM_175289	ENSMUSG00000052563	D930048N14Rik	AI315703|R75254	RIKEN cDNA D930048N14 gene	ncRNA
chr4	129223298	129223718	+	0	NA	exon (NM_001285867, exon 6 of 7)	exon (NM_001285867, exon 6 of 7)	4403	NM_001285866	97130	Mm.331907	NM_001033189	ENSMUSG00000050390	C77080	mKIAA1522	expressed sequence C77080	protein-coding
chr7	16140238	16140853	+	0	NA	exon (NM_001347561, exon 3 of 9)	exon (NM_001347561, exon 3 of 9)	10719	NM_148946	110891	Mm.241147	NM_148946	ENSMUSG00000030376	Slc8a2	Ncx2	solute carrier family 8 (sodium/calcium exchanger), member 2	protein-coding
chr4	20638882	20639589	+	0	NA	intron (NM_172987, intron 1 of 4)	intron (NM_172987, intron 1 of 4)	139433	NM_172987	269513	Mm.317473	NM_172987	ENSMUSG00000055761	Nkain3	C530048M05|E130310K16Rik	Na+/K+ transporting ATPase interacting 3	protein-coding
chr7	19561744	19562901	+	0	NA	promoter-TSS (NM_199149)	promoter-TSS (NM_199149)	76	NM_199149	232947	Mm.219662	NM_199149	ENSMUSG00000051403	Ppp1r37	Gm158|Lrrc68	protein phosphatase 1, regulatory subunit 37	protein-coding
chr1	5045664	5046199	+	0	NA	intron (NM_001177795, intron 1 of 5)	RLTR1B-int|LTR|ERV1	24354	NM_001177795	58175	Mm.103771	NM_021374	ENSMUSG00000002459	Rgs20	2900073E09Rik|Rgsz1	regulator of G-protein signaling 20	protein-coding
chr11	80615171	80616091	+	0	NA	intron (NM_177390, intron 16 of 21)	intron (NM_177390, intron 16 of 21)	-106525	NR_126552	77417	Mm.437510	NR_126552	ENSMUSG00000085078	C030013C21Rik	-	RIKEN cDNA C030013C21 gene	ncRNA
chr5	68846903	68847655	+	0	NA	Intergenic	Intergenic	494430	NM_175519	243043	Mm.234821	NM_175519	ENSMUSG00000037653	Kctd8	A730087N02Rik	potassium channel tetramerisation domain containing 8	protein-coding
chr6	64734231	64735294	+	0	NA	Intergenic	CpG	5637	NM_007500	11921	Mm.57229	NM_007500	ENSMUSG00000073043	Atoh1	Hath1|MATH-1|Math1|bHLHa14	atonal bHLH transcription factor 1	protein-coding
chr11	77840602	77841104	+	0	NA	intron (NM_001291212, intron 22 of 40)	intron (NM_001291212, intron 22 of 40)	39555	NM_001291214	360013	Mm.341248	NM_011586	ENSMUSG00000000631	Myo18a	MAJN|MyoPDZ|MysPDZ|SP-R210	myosin XVIIIA	protein-coding
chr7	140125242	140126032	+	0	NA	promoter-TSS (NM_001346725)	promoter-TSS (NM_001346725)	-20	NM_001346725	212503	Mm.486735	NM_153783	ENSMUSG00000025464	Paox	2410012F02Rik|AI118225|Pao	polyamine oxidase (exo-N4-amino)	protein-coding
chr4	42795052	42795645	+	0	NA	intron (NR_155456, intron 3 of 3)	MTE-int|LTR|ERVL-MaLR	-21355	NM_001193667	100504362	Mm.220853	NM_001193667	ENSMUSG00000095320	Gm1987	100038965	predicted gene 1987	protein-coding
chr2	91959103	91959441	+	0	NA	intron (NM_138306, intron 1 of 30)	intron (NM_138306, intron 1 of 30)	4291	NM_138306	104418	Mm.314923	NM_138306	ENSMUSG00000040479	Dgkz	E130307B02Rik|F730209L11Rik|mDGK[z]	diacylglycerol kinase zeta	protein-coding
chr7	122477777	122478602	+	0	NA	intron (NM_001316672, intron 5 of 16)	intron (NM_001316672, intron 5 of 16)	189064	NM_001316672	18751	Mm.207496	NM_008855	ENSMUSG00000052889	Prkcb	PKC-B|PKC-Beta|Pkcb|Prkcb1|Prkcb2	protein kinase C, beta	protein-coding
chr1	45031316	45032147	+	0	NA	Intergenic	Intergenic	-279807	NM_009930	12825	Mm.249555	NM_009930	ENSMUSG00000026043	Col3a1	AW550625|Col3a-1|Tsk-2|Tsk2	collagen, type III, alpha 1	protein-coding
chr11	54522250	54523417	+	0	NA	promoter-TSS (NM_175258)	promoter-TSS (NM_175258)	-12	NM_001252496	192786	Mm.254404	NM_175258	ENSMUSG00000037533	Rapgef6	A530068K01|AI844632|BB085664|C030018K18Rik|PDZ-GEF2|Pdzgef2|RA-GEF-2|Ragef2|mKIAA4052	Rap guanine nucleotide exchange factor (GEF) 6	protein-coding
chr18	48479414	48479748	+	0	NA	Intergenic	RMER19C|LTR|ERVK	434246	NM_001025388	433182	Mm.70666	NM_001025388	ENSMUSG00000059040	Eno1b	EG433182|Eno-1|Eno1|Gm5506|NNE	enolase 1B, retrotransposed	protein-coding
chr9	121777375	121778728	+	0	NA	exon (NM_028202, exon 1 of 6)	exon (NM_028202, exon 1 of 6)	444	NM_028202	72330	Mm.45734	NM_028202	ENSMUSG00000074001	Klhl40	2310024D23Rik|Kbtbd5	kelch-like 40	protein-coding
chr11	98260911	98261622	+	0	NA	Intergenic	Intergenic	-1340	NR_039579	100628613		NR_039579	ENSMUSG00000093176	Mir5119	mmu-mir-5119|mu-mir-5119	microRNA 5119	ncRNA
chr4	54550932	54551514	+	0	NA	Intergenic	Intergenic	-396722	NM_172867	242466	Mm.102904	NM_172867	ENSMUSG00000060206	Zfp462	6030417H05|9430078C22Rik|Gt4-2|Zfpip|Znf462	zinc finger protein 462	protein-coding
chr8	75456564	75457665	+	0	NA	intron (NM_027944, intron 1 of 12)	intron (NM_027944, intron 1 of 12)	8420	NM_001164235	71831	Mm.443238	NM_027944	ENSMUSG00000031620	Iqcm	1700007B14Rik	IQ motif containing M	protein-coding
chr16	84557989	84559001	+	0	NA	Intergenic	Intergenic	-121294	NR_040537	78023	Mm.243853	NR_040537		4930529L06Rik	-	RIKEN cDNA 4930529L06 gene	ncRNA
chr2	54635388	54635766	+	0	NA	intron (NM_173030, intron 3 of 12)	Lx5|LINE|L1	199190	NM_173030	271786	Mm.330227	NM_173030	ENSMUSG00000060988	Galnt13	A230002A12|A230020F20|BB182356	polypeptide N-acetylgalactosaminyltransferase 13	protein-coding
chr10	27476534	27477112	+	0	NA	intron (NM_008481, intron 1 of 63)	intron (NM_008481, intron 1 of 63)	86957	NR_131034	75855	Mm.402080	NR_131034	ENSMUSG00000101636	4930579H20Rik	-	RIKEN cDNA 4930579H20 gene	ncRNA
chr16	18620557	18622032	+	0	NA	TTS (NM_213614)	TTS (NM_213614)	1109	NM_010327	14724	Mm.475622	NM_010327	ENSMUSG00000050761	Gp1bb	-	glycoprotein Ib, beta polypeptide	protein-coding
chr8	57595936	57596434	+	0	NA	intron (NM_001167981, intron 1 of 11)	intron (NM_001167981, intron 1 of 11)	-55568	NR_040698	100502619	Mm.393851	NR_040698		AW046200	-	expressed sequence AW046200	ncRNA
chr12	108436389	108437039	+	0	NA	intron (NM_001364196, intron 1 of 22)	intron (NM_001364196, intron 1 of 22)	12677	NM_001364196	68519	Mm.236645	NM_001043335	ENSMUSG00000058070	Eml1	1110008N23Rik|A930030P13Rik|AA171013|AI847476|AI853955|ELP79|EMAP|EMAP-1|EMAPL|heco	echinoderm microtubule associated protein like 1	protein-coding
chr15	75873307	75873790	+	0	NA	Intergenic	Intergenic	11209	NM_026960	69146	Mm.27385	NM_026960	ENSMUSG00000022575	Gsdmd	1810036L03Rik|AW558049|DF5L|Dfna5l|Gsdmdc1|M2-4	gasdermin D	protein-coding
chr13	75317086	75317766	+	0	NA	Intergenic	Intergenic	227569	NM_013628	18548	Mm.1333	NM_013628	ENSMUSG00000021587	Pcsk1	Nec-1|Nec1|PC1|PC3|Phpp-1|SPC3	proprotein convertase subtilisin/kexin type 1	protein-coding
chr8	57162881	57163530	+	0	NA	Intergenic	MER102a|DNA|hAT-Charlie	157654	NR_154048	102636514	Mm.229304	NR_110474	ENSMUSG00000100510	Hand2os1	Gm28063|Hand2-as1|Uph	Hand2, opposite strand 1	ncRNA
chr11	97044740	97045323	+	0	NA	intron (NM_001357807, intron 2 of 4)	B4|SINE|B4	3449	NM_001357807	107732	Mm.208946	NM_026154	ENSMUSG00000001445	Mrpl10	0610040E02Rik|C78440|L10mt|MRP-L8|Rpml8	mitochondrial ribosomal protein L10	protein-coding
chr5	136094330	136095171	+	0	NA	intron (NM_001039103, intron 5 of 19)	intron (NM_001039103, intron 5 of 19)	-10772	NR_106002	102465626		NR_106002	ENSMUSG00000099003	Mir7035	Gm27661|mmu-mir-7035	microRNA 7035	ncRNA
chr4	152548274	152549144	+	0	NA	intron (NM_153424, intron 18 of 29)	intron (NM_153424, intron 18 of 29)	70567	NM_153424	260305	Mm.302496	NM_153424	ENSMUSG00000039577	Nphp4	4930564O18Rik|nmf192	nephronophthisis 4 (juvenile) homolog (human)	protein-coding
chr2	45884444	45885072	+	0	NA	Intergenic	Intergenic	188153	NR_040497	69405	Mm.396184	NR_040497	ENSMUSG00000086202	1700019E08Rik	-	RIKEN cDNA 1700019E08 gene	ncRNA
chr2	32896198	32896950	+	0	NA	intron (NM_146119, intron 1 of 13)	intron (NM_146119, intron 1 of 13)	20440	NM_146119	227737	Mm.301646	NM_146119	ENSMUSG00000026796	Fam129b	9130404D14Rik	family with sequence similarity 129, member B	protein-coding
chr5	139317835	139318406	+	0	NA	intron (NM_172723, intron 1 of 10)	intron (NM_172723, intron 1 of 10)	7344	NM_172723	231821	Mm.297819	NM_172723	ENSMUSG00000056413	Adap1	4930431P11Rik|Centa1|GC1L|p42IP4	ArfGAP with dual PH domains 1	protein-coding
chr14	96517861	96519517	+	0	NA	5' UTR (NM_053105, exon 1 of 11)	5' UTR (NM_053105, exon 1 of 11)	345	NM_053105	93688	Mm.308735	NM_053105	ENSMUSG00000022076	Klhl1	mKIAA1490	kelch-like 1	protein-coding
chr12	62442131	62442671	+	0	NA	Intergenic	Intergenic	-245386	NR_131949	73309	Mm.276558	NR_131949		Spanxn4	1700047L15Rik	SPANX family, member N4	ncRNA
chr7	24530094	24532069	+	0	NA	intron (NM_153134, intron 1 of 2)	intron (NM_153134, intron 1 of 2)	433	NM_153134	210146	Mm.41108	NM_153134	ENSMUSG00000041037	Irgq	AF322649|FKSG27|Irgq1	immunity-related GTPase family, Q	protein-coding
chr9	48760432	48760840	+	0	NA	intron (NM_001033324, intron 2 of 6)	intron (NM_001033324, intron 2 of 6)	75305	NM_001033324	235320	Mm.457803	NM_001033324	ENSMUSG00000066687	Zbtb16	AI467657|PLZF|Zfp145|lu	zinc finger and BTB domain containing 16	protein-coding
chr2	95663368	95663978	+	0	NA	Intergenic	Intergenic	-654496	NM_001289742	241568	Mm.241682	NM_178725	ENSMUSG00000050587	Lrrc4c	6430556C10Rik|NGL-1	leucine rich repeat containing 4C	protein-coding
chr1	44216679	44217444	+	0	NA	intron (NM_207281, intron 2 of 4)	intron (NM_207281, intron 2 of 4)	1870	NM_207281	403183	Mm.336176	NM_207281	ENSMUSG00000046828	Mettl21e	4832428D23Rik|Gm991	methyltransferase like 21E	protein-coding
chr5	126525730	126526490	+	0	NA	Intergenic	Intergenic	-504679	NR_040685	71247	Mm.399586	NR_040685	ENSMUSG00000105490	4933438B17Rik	-	RIKEN cDNA 4933438B17 gene	ncRNA
chr15	7406370	7406995	+	0	NA	Intergenic	Intergenic	-8287	NM_001289498	268780	Mm.203208	NM_178748	ENSMUSG00000042961	Egflam	5930412K08|AU040377	EGF-like, fibronectin type III and laminin G domains	protein-coding
chr6	86026719	86026971	+	0	NA	Intergenic	Intergenic	-1836	NM_001271858	11519	Mm.104155	NM_013458	ENSMUSG00000030000	Add2	2900072M03Rik|add97	adducin 2 (beta)	protein-coding
chr7	16938509	16938800	+	0	NA	Intergenic	Intergenic	-6028	NM_001099636	434128	Mm.483018	NM_001099636	ENSMUSG00000070802	Pnmal2	EG434128	PNMA-like 2	protein-coding
chr11	95858323	95859794	+	0	NA	non-coding (NR_045187, exon 1 of 2)	non-coding (NR_045187, exon 1 of 2)	241	NR_045187	73906	Mm.399894	NR_045187	ENSMUSG00000086015	4833417C18Rik	-	RIKEN cDNA 4833417C18 gene	ncRNA
chr15	17485542	17486093	+	0	NA	Intergenic	Intergenic	756902	NM_009869	12565	Mm.439758	NM_009869	ENSMUSG00000025370	Cdh9	-	cadherin 9	protein-coding
chr15	102245903	102247394	+	0	NA	promoter-TSS (NM_001042727)	promoter-TSS (NM_001042727)	-148	NM_001042727	19411	Mm.1273	NM_011244	ENSMUSG00000001288	Rarg	Nr1b3|RAR-gamma|RARD|RARgamma2	retinoic acid receptor, gamma	protein-coding
chr15	84441622	84442185	+	0	NA	intron (NM_001347543, intron 1 of 5)	intron (NM_001347543, intron 1 of 5)	4707	NM_001347543	72301	Mm.275387	NM_001163145	ENSMUSG00000062760	Shisal1	1810041L15Rik|Kiaa1644	shisa like 1	protein-coding
chr2	53592626	53593151	+	0	NA	Intergenic	L1_Mus3|LINE|L1	400804	NM_022989	65103	Mm.37623	NM_022989	ENSMUSG00000026960	Arl6ip6	2310057C01Rik|2610529A11Rik|Aip-6	ADP-ribosylation factor-like 6 interacting protein 6	protein-coding
chr7	124319309	124319775	+	0	NA	intron (NM_001252072, intron 1 of 1)	intron (NM_001252072, intron 1 of 1)	336714	NM_001252072	628779	Mm.40210	NM_001252072	ENSMUSG00000078591	Hs3st4	Gm6915	heparan sulfate (glucosamine) 3-O-sulfotransferase 4	protein-coding
chr15	100551430	100552403	+	0	NA	promoter-TSS (NM_001289603)	promoter-TSS (NM_001289603)	92	NM_001289603	21422	Mm.219040	NM_033476	ENSMUSG00000009733	Tfcp2	CP-2|CP2|D230015P20Rik|LBP-1c|LBP-1d|LBP1|LSF|Tcfcp2|UBP-1	transcription factor CP2	protein-coding
chr13	74993987	74994457	+	0	NA	Intergenic	Intergenic	-95635	NM_013628	18548	Mm.1333	NM_013628	ENSMUSG00000021587	Pcsk1	Nec-1|Nec1|PC1|PC3|Phpp-1|SPC3	proprotein convertase subtilisin/kexin type 1	protein-coding
chr9	108067879	108068322	+	0	NA	intron (NM_001311152, intron 15 of 38)	intron (NM_001311152, intron 15 of 38)	11201	NM_001311152	84585	Mm.379272	NM_032543	ENSMUSG00000041528	Rnf123	BC003945|Kpc1	ring finger protein 123	protein-coding
chr12	64207772	64208194	+	0	NA	Intergenic	Intergenic	266915	NM_001163271	623046	Mm.189552	NM_001163271	ENSMUSG00000043060	Fscb	EG623046	fibrous sheath CABYR binding protein	protein-coding
chr2	27108884	27109593	+	0	NA	TTS (NM_029981)	TTS (NM_029981)	29859	NM_029981	77794	Mm.330088	NM_029981	ENSMUSG00000036040	Adamtsl2	A930008K15Rik|tcp-1	ADAMTS-like 2	protein-coding
chr11	60199651	60200287	+	0	NA	TTS (NR_105886)	TTS (NR_105886)	648	NR_105886	102465555		NR_105886	ENSMUSG00000098547	Mir6921	Gm27352|mmu-mir-6921	microRNA 6921	ncRNA
chr6	70301150	70301788	+	0	NA	Intergenic	Lx3C|LINE|L1	490706	NM_009075	19895	Mm.17905	NM_009075	ENSMUSG00000053604	Rpia	RPI	ribose 5-phosphate isomerase A	protein-coding
chr12	36333643	36334926	+	0	NA	Intergenic	Intergenic	20115	NM_025312	66042	Mm.43375	NM_025312	ENSMUSG00000036169	Sostdc1	0610006G05Rik|Sostl|USAG-1|Wise|ectodin	sclerostin domain containing 1	protein-coding
chrX	98265941	98266648	+	0	NA	intron (NM_013476, intron 2 of 7)	BGLII|LTR|ERVK	117537	NM_013476	11835	Mm.39005	NM_013476	ENSMUSG00000046532	Ar	AW320017|Tfm	androgen receptor	protein-coding
chr3	78413533	78414003	+	0	NA	Intergenic	(TATATG)n|Simple_repeat|Simple_repeat	731978	NM_001310536	76089	Mm.31220	NM_001099624	ENSMUSG00000062232	Rapgef2	5830453M24Rik|CNRasGEF|Pdzgef1|RA-GEF-1|mKIAA0313|nRapGEP	Rap guanine nucleotide exchange factor (GEF) 2	protein-coding
chr2	12923575	12924489	+	0	NA	promoter-TSS (NM_008961)	promoter-TSS (NM_008961)	-9	NM_001305437	19212	Mm.229322	NM_008961	ENSMUSG00000026730	Pter	AI790318|Mpr56-1	phosphotriesterase related	protein-coding
chrX	131488135	131488441	+	0	NA	Intergenic	Intergenic	1738546	NM_172493	54004	Mm.10763	NM_017398	ENSMUSG00000034480	Diaph2	Dia3|Diap2|Drf2|E430022I22Rik	diaphanous related formin 2	protein-coding
chr14	79992030	79992899	+	0	NA	Intergenic	AT_rich|Low_complexity|Low_complexity	-7838	NM_001351947	380924	Mm.26456	NM_001030294	ENSMUSG00000022026	Olfm4	GC1|GW112|Gm296|Gm913|OlfD|pPD4	olfactomedin 4	protein-coding
chr7	35194706	35195218	+	0	NA	intron (NM_017394, intron 1 of 10)	intron (NM_017394, intron 1 of 10)	8577	NM_017394	53896	Mm.35567	NM_017394	ENSMUSG00000030495	Slc7a10	AL024237|Asc-1|D7Bwg0847e	solute carrier family 7 (cationic amino acid transporter, y+ system), member 10	protein-coding
chr5	122566314	122567157	+	0	NA	intron (NM_001358918, intron 14 of 18)	intron (NM_001358918, intron 14 of 18)	47809	NM_001358919	12589	Mm.10125	NM_009879	ENSMUSG00000029469	Ift81	AW060663|Cdv-1|Cdv-1r|Cdv1	intraflagellar transport 81	protein-coding
chr6	124919625	124920305	+	0	NA	intron (NR_152158, intron 1 of 1)	intron (NR_152158, intron 1 of 1)	-2019	NM_026988	69202	Mm.142187	NM_026988	ENSMUSG00000030122	Ptms	2610009E16Rik	parathymosin	protein-coding
chr19	3575352	3576429	+	0	NA	promoter-TSS (NM_028999)	promoter-TSS (NM_028999)	-141	NM_029456	52036	Mm.284686	NM_028999	ENSMUSG00000024908	Ppp6r3	4930528G08Rik|9130026N02Rik|D19Bwg1430e|D19Ertd703e|Pp6r3|Ppcs3|Pptcs3|Sapl|Saps3|mKIAA1558	protein phosphatase 6, regulatory subunit 3	protein-coding
chr15	99265645	99266114	+	0	NA	Intergenic	Intergenic	-13918	NM_001164156	51812	Mm.383472	NM_016766	ENSMUSG00000037570	Mcrs1	C78274|ICP22BP|MSP58|P78	microspherule protein 1	protein-coding
chr11	103685118	103685844	+	0	NA	intron (NM_001362853, intron 4 of 5)	intron (NM_001362853, intron 4 of 5)	11573	NM_001362853	56494	Mm.195451	NM_019650	ENSMUSG00000020946	Gosr2	2310032N09Rik|C76855|Gs27|SNARE|membrin	golgi SNAP receptor complex member 2	protein-coding
chr4	8357393	8358075	+	0	NA	Intergenic	Intergenic	-118693	NM_007592	12319	Mm.119320	NM_007592	ENSMUSG00000041261	Car8	AW546993|Ca8|Cals|Cals1|Carp|wdl	carbonic anhydrase 8	protein-coding
chr8	75118365	75119421	+	0	NA	intron (NM_008566, intron 8 of 16)	MIR|SINE|MIR	9384	NM_008566	17218	Mm.5048	NM_008566	ENSMUSG00000005410	Mcm5	AA617332|AI324988|AL033333|Cdc46|Mcmd5|P1-CDC46	minichromosome maintenance complex component 5	protein-coding
chr11	80670002	80671025	+	0	NA	intron (NM_177390, intron 11 of 21)	intron (NM_177390, intron 11 of 21)	109512	NM_177390	338367	Mm.151948	NM_177390	ENSMUSG00000035441	Myo1d	9930104H07Rik|AW544947|D11Ertd9e|myosin-1d	myosin ID	protein-coding
chr14	27862314	27862684	+	0	NA	intron (NM_177814, intron 3 of 15)	intron (NM_177814, intron 3 of 15)	240092	NM_177814	238988	Mm.318004	NM_177814	ENSMUSG00000040640	Erc2	6430531D06|CAST|CAST1/ERC2|D14Ertd171e|ELKS2alpha	ELKS/RAB6-interacting/CAST family member 2	protein-coding
chr4	24700216	24701297	+	0	NA	intron (NM_001033531, intron 4 of 9)	L1_Mur3|LINE|L1	150368	NM_001355618	212390	Mm.409581	NM_001033531	ENSMUSG00000040387	Klhl32	6430524H05Rik|D4Ertd389e|Gm1356|mKIAA1900	kelch-like 32	protein-coding
chr16	21373286	21374521	+	0	NA	Intergenic	Intergenic	-40547	NR_131983	76222	Mm.86031	NR_131983	ENSMUSG00000116632	Magef1	6430590I03Rik	melanoma antigen family F, 1	pseudo
chr3	61419834	61420282	+	0	NA	Intergenic	Intergenic	55551	NM_028712	74012	Mm.422674	NM_028712	ENSMUSG00000036894	Rap2b	4021402C18Rik|AA408554	RAP2B, member of RAS oncogene family	protein-coding
chr2	80870196	80871139	+	0	NA	Intergenic	Intergenic	231403	NM_001190179	69482	Mm.29200	NM_027091	ENSMUSG00000026999	Nup35	2310006I24Rik|35kDa|5330402E05Rik|MP44|NO44	nucleoporin 35	protein-coding
chr9	42053701	42053904	+	0	NA	intron (NM_001357261, intron 7 of 42)	intron (NM_001357261, intron 7 of 42)	23411	NM_001357261	20660	Mm.121920	NM_011436	ENSMUSG00000049313	Sorl1	2900010L19Rik|AI596264|AW261561|LR11|SorLA|gp250|mSorLA	sortilin-related receptor, LDLR class A repeats-containing	protein-coding
chr9	27518138	27518495	+	0	NA	Intergenic	Intergenic	121104	NM_001305058	75469	Mm.45824	NM_029299	ENSMUSG00000031991	Spata19	1700001L23Rik|AV047838|spergen-1	spermatogenesis associated 19	protein-coding
chr15	99688562	99689303	+	0	NA	intron (NM_009597, intron 3 of 11)	intron (NM_009597, intron 3 of 11)	-3292	NM_001289791	11419	Mm.440107	NM_009597	ENSMUSG00000023017	Asic1	AI843610|ASIC|ASIC1a|Accn2|B530003N02Rik|BNaC2	acid-sensing (proton-gated) ion channel 1	protein-coding
chr15	100237294	100238256	+	0	NA	intron (NM_007497, intron 2 of 6)	intron (NM_007497, intron 2 of 6)	9916	NM_007497	11908	Mm.676	NM_007497	ENSMUSG00000023027	Atf1	-	activating transcription factor 1	protein-coding
chr6	70356192	70356798	+	0	NA	Intergenic	Intergenic	435680	NM_009075	19895	Mm.17905	NM_009075	ENSMUSG00000053604	Rpia	RPI	ribose 5-phosphate isomerase A	protein-coding
chr2	92402398	92403589	+	0	NA	TTS (NM_009963)	TTS (NM_009963)	-1730	NM_011162	19099	Mm.2720	NM_011162	ENSMUSG00000027223	Mapk8ip1	IB1|JIP-1|Jip1|Prkm8ip|Skip|mjip-2a	mitogen-activated protein kinase 8 interacting protein 1	protein-coding
chr9	62777245	62778048	+	0	NA	intron (NM_176922, intron 28 of 29)	intron (NM_176922, intron 28 of 29)	34002	NM_010193	14155	Mm.24069	NM_010193	ENSMUSG00000032244	Fem1b	mKIAA0396	feminization 1 homolog b (C. elegans)	protein-coding
chr15	102624803	102625914	+	0	NA	5' UTR (NM_001310070, exon 1 of 12)	5' UTR (NM_001310070, exon 1 of 12)	106	NM_001310070	223922	Mm.208714	NM_146065	ENSMUSG00000099083	Atf7	1110012F10Rik|9430065F09Rik|AI549878|C130020M04Rik	activating transcription factor 7	protein-coding
chrX	91112026	91112570	+	0	NA	Intergenic	Intergenic	-42870	NR_126535	101055749	Mm.300769	NR_126535	ENSMUSG00000059972	LOC101055749	-	Gm5941 pseudogene	pseudo
chr1	70270098	70270743	+	0	NA	intron (NM_025728, intron 3 of 7)	intron (NM_025728, intron 3 of 7)	318805	NM_025728	66722	Mm.440554	NM_025728	ENSMUSG00000053153	Spag16	4921511D23Rik|4930524F24Rik|4930585K05Rik|AV261009|Pf20|Wdr29	sperm associated antigen 16	protein-coding
chr11	69169076	69169976	+	0	NA	intron (NM_009659, intron 14 of 14)	intron (NM_009659, intron 14 of 14)	12454	NM_009659	11686	Mm.340329	NM_009659	ENSMUSG00000032807	Alox12b	12R-LOX|Aloxe2|e-LOX2	arachidonate 12-lipoxygenase, 12R type	protein-coding
chr9	112861176	112861412	+	0	NA	Intergenic	Intergenic	604720	NR_033433	620760	Mm.259863	NR_015468	ENSMUSG00000087038	2900079G21Rik	C130083B14|Gm6179	RIKEN cDNA 2900079G21 gene	ncRNA
chr11	101245955	101246665	+	0	NA	promoter-TSS (NM_019444)	promoter-TSS (NM_019444)	-24	NM_019444	54409	Mm.260698	NM_019444	ENSMUSG00000001240	Ramp2	-	receptor (calcitonin) activity modifying protein 2	protein-coding
chr7	145106282	145107002	+	0	NA	Intergenic	Intergenic	101477	NM_001369202	100040049	Mm.102235	NM_001369202	ENSMUSG00000109305	Smim38	1810010D01Rik|Gm2572	small integral membrane protein 38	protein-coding
chr4	126262039	126262651	+	0	NA	promoter-TSS (NM_013718)	promoter-TSS (NM_013718)	-60	NM_013718	27096	Mm.8392	NM_013718	ENSMUSG00000028847	Trappc3	1110058K12Rik|AI835942|AU019197|Bet3	trafficking protein particle complex 3	protein-coding
chr3	59065797	59068076	+	0	NA	intron (NM_177855, intron 4 of 43)	intron (NM_177855, intron 4 of 43)	34885	NM_173398	229323	Mm.123648	NM_173398	ENSMUSG00000050075	Gpr171	A630006E05|F730001G15Rik|H963	G protein-coupled receptor 171	protein-coding
chr1	180763683	180764327	+	0	NA	Intergenic	Intergenic	37962	NM_133225	170760	Mm.272981	NM_133225	ENSMUSG00000026499	Acbd3	60kDa|8430407O11Rik|D1Ertd10e|GCP60|GOLPH1|Gocap1|Pap7	acyl-Coenzyme A binding domain containing 3	protein-coding
chr18	17021828	17022967	+	0	NA	Intergenic	Intergenic	-13111	NR_130158	75433	Mm.60907	NR_130158	ENSMUSG00000087170	1700001G01Rik	-	RIKEN cDNA 1700001G01 gene	ncRNA
chr15	99074339	99075115	+	0	NA	promoter-TSS (NM_001162506)	promoter-TSS (NM_001162506)	-58	NR_155351	102637490	Mm.421289	NR_155351	ENSMUSG00000116371	Gm34284	-	predicted gene, 34284	ncRNA
chr7	127541721	127542125	+	0	NA	exon (NM_001304266, exon 25 of 34)	exon (NM_001304266, exon 25 of 34)	14026	NR_034045	100217442	Mm.451113	NR_034045	ENSMUSG00000065259	Snora30	MBI-26	small nucleolar RNA, H/ACA box 30	snoRNA
chr5	142400857	142402031	+	0	NA	promoter-TSS (NM_199068)	promoter-TSS (NM_199068)	-53	NM_199068	17425	Mm.24214	NM_010812	ENSMUSG00000056493	Foxk1	A630048H08Rik|AI463295|Gm10868|Mnf	forkhead box K1	protein-coding
chr5	135794156	135795038	+	0	NA	Intergenic	Intergenic	15948	NM_008617	17448	Mm.297096	NM_008617	ENSMUSG00000019179	Mdh2	MDH|Mdh-2|Mor-1|Mor1	malate dehydrogenase 2, NAD (mitochondrial)	protein-coding
chr14	42134598	42135054	+	0	NA	Intergenic	Intergenic	-39549	NR_073362	73553	Mm.243777	NM_028570	ENSMUSG00000090462	1700091H14Rik	100041930|Gm3578	RIKEN cDNA 1700091H14 gene	ncRNA
chr15	85015579	85016194	+	0	NA	Intergenic	Intergenic	-1255	NM_023478	22270	Mm.46214	NM_023478	ENSMUSG00000022435	Upk3a	1110017C07Rik|UP3a|UPIII|Upk3	uroplakin 3A	protein-coding
chr15	97963662	97964933	+	0	NA	promoter-TSS (NM_001252153)	promoter-TSS (NM_001252153)	68	NM_201359	380967	Mm.196630	NM_201359	ENSMUSG00000052369	Tmem106c	AI046681|BC046621|D15Ertd405e	transmembrane protein 106C	protein-coding
chr5	130129008	130130935	+	0	NA	intron (NM_001130476, intron 4 of 5)	intron (NM_001130476, intron 4 of 5)	-14912	NM_172509	212919	Mm.55812	NM_172509	ENSMUSG00000034110	Kctd7	4932409E18|9430010P06Rik	potassium channel tetramerisation domain containing 7	protein-coding
chr5	124071772	124072314	+	0	NA	intron (NM_019875, intron 10 of 11)	intron (NM_019875, intron 10 of 11)	23755	NM_019875	56325	Mm.254839	NM_019875	ENSMUSG00000029408	Abcb9	TAPL|mKIAA1520	ATP-binding cassette, sub-family B (MDR/TAP), member 9	protein-coding
chr4	128179086	128180033	+	0	NA	intron (NM_001281955, intron 3 of 70)	intron (NM_001281955, intron 3 of 70)	-12962	NM_029137	74989	Mm.388887	NM_029137		Csmd2os	4930465A12Rik	CUB and Sushi multiple domains 2, opposite strand	protein-coding
chr13	5450831	5451789	+	0	NA	Intergenic	Intergenic	406782	NR_045891	71867	Mm.179181	NR_045891	ENSMUSG00000100625	1700016G22Rik	-	RIKEN cDNA 1700016G22 gene	ncRNA
chr14	5460125	5460465	+	0	NA	Intergenic	CpG	-4847	NM_001291094	100041515	Mm.443041	NM_001205306	ENSMUSG00000096629	Gm3383	-	predicted gene 3383	protein-coding
chr5	122997604	122998310	+	0	NA	non-coding (NR_045820, exon 3 of 3)	non-coding (NR_045820, exon 3 of 3)	8603	NR_045820	109202	Mm.30769	NM_175405	ENSMUSG00000056735	A930024E05Rik	-	RIKEN cDNA A930024E05 gene	ncRNA
chr7	132067157	132068462	+	0	NA	intron (NM_018867, intron 7 of 13)	intron (NM_018867, intron 7 of 13)	86932	NM_018867	55987	Mm.471654	NM_018867	ENSMUSG00000030862	Cpxm2	4632435C11Rik|CPX-2|Cpx2	carboxypeptidase X 2 (M14 family)	protein-coding
chr4	152527267	152527579	+	0	NA	intron (NM_153424, intron 11 of 29)	intron (NM_153424, intron 11 of 29)	49281	NM_153424	260305	Mm.302496	NM_153424	ENSMUSG00000039577	Nphp4	4930564O18Rik|nmf192	nephronophthisis 4 (juvenile) homolog (human)	protein-coding
chr4	124595885	124596392	+	0	NA	Intergenic	Intergenic	26959	NR_045819	108809	Mm.250313	NR_045819		4933407E24Rik	-	RIKEN cDNA 4933407E24 gene	ncRNA
chr12	63623740	63624797	+	0	NA	Intergenic	Intergenic	850630	NM_001163271	623046	Mm.189552	NM_001163271	ENSMUSG00000043060	Fscb	EG623046	fibrous sheath CABYR binding protein	protein-coding
chr10	128376498	128378477	+	0	NA	intron (NM_172790, intron 1 of 27)	CpG	363	NM_172790	237615	Mm.440177	NM_172790	ENSMUSG00000014498	Ankrd52	6430544C07|G431002C21Rik	ankyrin repeat domain 52	protein-coding
chr12	3861331	3862612	+	0	NA	intron (NR_045884, intron 1 of 3)	intron (NR_045884, intron 1 of 3)	273	NR_045884	100038522	Mm.417270	NR_045884	ENSMUSG00000073242	Dnmt3aos	Gm10485	DNA methyltransferase 3A, opposite strand	ncRNA
chr5	3429086	3429519	+	0	NA	intron (NM_009873, intron 4 of 7)	intron (NM_009873, intron 4 of 7)	85409	NM_009873	12571	Mm.31672	NM_009873	ENSMUSG00000040274	Cdk6	AI504062|Crk2	cyclin-dependent kinase 6	protein-coding
chr4	138702580	138703009	+	0	NA	Intergenic	Intergenic	22062	NM_001285930	212190	Mm.292226	NM_178671	ENSMUSG00000043621	Ubxn10	5730509E04Rik|A830047D02|Ubxd3	UBX domain protein 10	protein-coding
chr2	30399474	30400289	+	0	NA	TTS (NM_007760)	TTS (NM_007760)	7627	NR_110963	57170	Mm.285167	NM_020329	ENSMUSG00000026856	Dolpp1	0610011H20Rik|AB030189|LSFR2	dolichyl pyrophosphate phosphatase 1	protein-coding
chr2	154583899	154584685	+	0	NA	Intergenic	Intergenic	-14400	NM_007891	13555	Mm.18036	NM_007891	ENSMUSG00000027490	E2f1	E2F-1|Tg(Wnt1-cre)2Sor|mKIAA4009	E2F transcription factor 1	protein-coding
chr9	43679262	43679783	+	0	NA	Intergenic	Intergenic	-64432	NM_021424	58235	Mm.335096	NM_021424	ENSMUSG00000032012	Nectin1	AI835281|AW549174|Cd111|HIgR|HveC|PRR|PRR1|Pvrl1|nectin-1	nectin cell adhesion molecule 1	protein-coding
chr4	149724020	149724891	+	0	NA	TTS (NM_001284273)	TTS (NM_001284273)	13315	NM_001284273	230917	Mm.266704	NM_177672	ENSMUSG00000044700	Tmem201	AV028368|D4Ertd429e|Net5|Samp1	transmembrane protein 201	protein-coding
chr5	131134732	131135290	+	0	NA	intron (NM_145218, intron 2 of 10)	intron (NM_145218, intron 2 of 10)	172511	NM_145218	212996	Mm.299204	NM_145218	ENSMUSG00000034040	Galnt17	AA388321|E330012B09Rik|Galnt19|Gcap8|Wbscr17	polypeptide N-acetylgalactosaminyltransferase 17	protein-coding
chr5	139371779	139372503	+	0	NA	intron (NM_028469, intron 2 of 4)	CpG	-2396	NR_029768	723898		NR_029768	ENSMUSG00000065593	Mir339	Mirn339|mir-339|mmu-mir-339	microRNA 339	ncRNA
chr15	79516191	79517067	+	0	NA	exon (NM_134090, exon 1 of 5)	exon (NM_134090, exon 1 of 5)	221	NM_134090	105785	Mm.298199	NM_134090	ENSMUSG00000010830	Kdelr3	AI173274	KDEL (Lys-Asp-Glu-Leu) endoplasmic reticulum protein retention receptor 3	protein-coding
chr15	77245365	77246309	+	0	NA	promoter-TSS (NM_001358772)	promoter-TSS (NM_001358772)	-229	NM_001358772	93686	Mm.202774	NM_053104	ENSMUSG00000033565	Rbfox2	Fbm2|Fxh|Hrnbp2|Rbm9	RNA binding protein, fox-1 homolog (C. elegans) 2	protein-coding
chr14	7105244	7105838	+	0	NA	promoter-TSS (NM_001024712)	promoter-TSS (NM_001024712)	-38	NM_001024712	100042149	Mm.396155	NM_001024712	ENSMUSG00000092167	Gm3696	544988|Gm10014|Gm5794	predicted gene 3696	protein-coding
chr9	121704697	121705480	+	0	NA	promoter-TSS (NM_001164562)	promoter-TSS (NM_001164562)	-59	NM_001164562	215474	Mm.31421	NM_178677	ENSMUSG00000061536	Sec22c	4932412K21|5930407I15Rik|C530046H07|Sec22l3	SEC22 homolog C, vesicle trafficking protein	protein-coding
chr2	29879891	29880703	+	0	NA	intron (NM_207298, intron 9 of 11)	intron (NM_207298, intron 9 of 11)	-8717	NM_001355137	18286	Mm.330116	NM_013615	ENSMUSG00000026790	Odf2	AI848335|MMTEST29	outer dense fiber of sperm tails 2	protein-coding
chr9	48984588	48985906	+	0	NA	promoter-TSS (NM_001359739)	promoter-TSS (NM_001359739)	-138	NM_001359739	235323	Mm.21630	NM_175482	ENSMUSG00000032267	Usp28	9830148O20Rik|AU022237|mKIAA1515	ubiquitin specific peptidase 28	protein-coding
chr8	70486313	70487644	+	0	NA	intron (NM_182991, intron 1 of 7)	intron (NM_182991, intron 1 of 7)	370	NM_182991	67937	Mm.23002	NM_182991	ENSMUSG00000035964	Tmem59l	5330410G16Rik	transmembrane protein 59-like	protein-coding
chrX	60403654	60405183	+	0	NA	promoter-TSS (NM_001037863)	promoter-TSS (NM_001037863)	-413	NM_001359002	320940	Mm.490394	NM_001001798	ENSMUSG00000062949	Atp11c	A330005H02Rik|AI315324|Ig	ATPase, class VI, type 11C	protein-coding
chr2	25706480	25707409	+	0	NA	promoter-TSS (NM_023326)	promoter-TSS (NM_023326)	65	NM_023326	107771	Mm.330057	NM_023326	ENSMUSG00000049086	Bmyc	2900002K07Rik|AW060705|Mycb	brain expressed myelocytomatosis oncogene	protein-coding
chr1	99003732	99004644	+	0	NA	Intergenic	Intergenic	583064	NM_027584	70866	Mm.389164	NM_027584	ENSMUSG00000026336	Slco6d1	4921511I05Rik	solute carrier organic anion transporter family, member 6d1	protein-coding
chr4	128142283	128142808	+	0	NA	intron (NM_029137, intron 2 of 4)	intron (NM_029137, intron 2 of 4)	24052	NM_029137	74989	Mm.388887	NM_029137		Csmd2os	4930465A12Rik	CUB and Sushi multiple domains 2, opposite strand	protein-coding
chr11	98031414	98031698	+	0	NA	Intergenic	Intergenic	4632	NM_009078	19921	Mm.10247	NM_009078	ENSMUSG00000017404	Rpl19	-	ribosomal protein L19	protein-coding
chr11	60707151	60708025	+	0	NA	exon (NM_001159405, exon 11 of 22)	exon (NM_001159405, exon 11 of 22)	7898	NM_008502	16897	Mm.285453	NM_008502	ENSMUSG00000020536	Llgl1	AI325176|Lgl1|Llglh|Mgl1	LLGL1 scribble cell polarity complex component	protein-coding
chr10	55099376	55100134	+	0	NA	Intergenic	Intergenic	-1007162	NM_001163833	73390	Mm.181475	NM_133751	ENSMUSG00000047669	Msl3l2	1700060H10Rik	MSL3 like 2	protein-coding
chr17	25539335	25539984	+	0	NA	Intergenic	Intergenic	21070	NR_155500	102636737	Mm.384127	NR_155500	ENSMUSG00000117437	Gm33727	-	predicted gene, 33727	ncRNA
chr16	32099193	32100277	+	0	NA	promoter-TSS (NM_001111025)	promoter-TSS (NM_001111025)	-8	NM_024464	72084	Mm.37613	NM_024464	ENSMUSG00000023791	Pigx	2010319C14Rik|PIG-X	phosphatidylinositol glycan anchor biosynthesis, class X	protein-coding
chr4	6225113	6225715	+	0	NA	Intergenic	Intergenic	34309	NM_026534	68053	Mm.404043	NM_026534	ENSMUSG00000028243	Ubxn2b	3110003A22Rik|6430407D20Rik|AI451665|p37	UBX domain protein 2B	protein-coding
chr13	118791569	118792441	+	0	NA	3' UTR (NM_008002, exon 3 of 3)	3' UTR (NM_008002, exon 3 of 3)	77306	NM_008002	14165	Mm.317323	NM_008002	ENSMUSG00000021732	Fgf10	AEY17|BB213776|Fgf-10|Gsfaey17	fibroblast growth factor 10	protein-coding
chr2	164137481	164138376	+	0	NA	intron (NM_021420, intron 10 of 10)	intron (NM_021420, intron 10 of 10)	33185	NM_008435	16538	Mm.6217	NM_008435	ENSMUSG00000040164	Kcns1	Kv9.1	K+ voltage-gated channel, subfamily S, 1	protein-coding
chr2	56109429	56110224	+	0	NA	Intergenic	Intergenic	673856	NM_008426	16519	Mm.5127	NM_008426	ENSMUSG00000026824	Kcnj3	GIRK-1|GIRK1|Kcnf3|Kir3.1	potassium inwardly-rectifying channel, subfamily J, member 3	protein-coding
chr4	136689928	136690648	+	0	NA	intron (NM_010142, intron 5 of 15)	intron (NM_010142, intron 5 of 15)	67667	NM_001243262	242707	Mm.448979	NM_001243262	ENSMUSG00000070683	Lactbl1	-	lactamase, beta-like 1	protein-coding
chr8	123692131	123693079	+	0	NA	Intergenic	Intergenic	38676	NM_133955	69581	Mm.168257	NM_133955	ENSMUSG00000039960	Rhou	2310026M05Rik|AI182090|Arhu|CDC42L1|G28K|WRCH-1|WRCH1|mG28K	ras homolog family member U	protein-coding
chr10	52185600	52186332	+	0	NA	intron (NM_011282, intron 1 of 43)	intron (NM_011282, intron 1 of 43)	9278	NM_011282	19886	Mm.236163	NM_011282	ENSMUSG00000019893	Ros1	Ros-1|c-ros	Ros1 proto-oncogene	protein-coding
chr11	68862748	68863698	+	0	NA	Intergenic	Intergenic	-10088	NM_001363305	83431	Mm.31979	NM_023668	ENSMUSG00000018736	Ndel1	2600006O07Rik|MITAP1|NUDEL|mNudE-L|mNudel	nudE neurodevelopment protein 1 like 1	protein-coding
chr7	24481162	24482175	+	0	NA	promoter-TSS (NM_153112)	promoter-TSS (NM_153112)	-355	NM_153112	260299	Mm.178322	NM_153112	ENSMUSG00000054793	Cadm4	Igdf4c|Igsf4c|Tsll2	cell adhesion molecule 4	protein-coding
chr15	77798554	77799491	+	0	NA	intron (NM_022410, intron 3 of 40)	intron (NM_022410, intron 3 of 40)	-42012	NM_001357895	239552	Mm.125650	NM_001081970	ENSMUSG00000056656	Apol8	9830006J20Rik|APOL-II|Apol2	apolipoprotein L 8	protein-coding
chr7	139221036	139221547	+	0	NA	intron (NM_027164, intron 3 of 10)	intron (NM_027164, intron 3 of 10)	-7984	NM_001162540	57740	Mm.65336	NM_021302	ENSMUSG00000015981	Stk32c	PKE|Pkek|YANK3	serine/threonine kinase 32C	protein-coding
chr1	92195532	92196250	+	0	NA	Intergenic	Intergenic	-15550	NM_207225	208727	Mm.318567	NM_207225	ENSMUSG00000026313	Hdac4	4932408F19Rik|HD4	histone deacetylase 4	protein-coding
chr18	70917666	70918206	+	0	NA	Intergenic	Intergenic	349644	NM_001311071	17191	Mm.322	NM_010773	ENSMUSG00000024513	Mbd2	MBD2a	methyl-CpG binding domain protein 2	protein-coding
chr4	126273659	126274412	+	0	NA	exon (NM_013718, exon 4 of 5)	exon (NM_013718, exon 4 of 5)	11630	NM_013718	27096	Mm.8392	NM_013718	ENSMUSG00000028847	Trappc3	1110058K12Rik|AI835942|AU019197|Bet3	trafficking protein particle complex 3	protein-coding
chr13	119408497	119409678	+	0	NA	promoter-TSS (NM_008710)	promoter-TSS (NM_008710)	-76	NM_008710	18115	Mm.132584	NM_008710	ENSMUSG00000116207	Nnt	4930423F13Rik|AI323702|BB168308	nicotinamide nucleotide transhydrogenase	protein-coding
chr6	25040692	25041341	+	0	NA	Intergenic	Intergenic	-84891	NM_177013	319832	Mm.127446	NM_177013	ENSMUSG00000048022	Tmem229a	6332401O19Rik	transmembrane protein 229A	protein-coding
chr15	76198628	76198889	+	0	NA	promoter-TSS (NM_201393)	promoter-TSS (NM_201393)	-549	NM_201393	18810	Mm.234912	NM_011117	ENSMUSG00000022565	Plec	AA591047|AU042537|EBS1|PCN|PLTN|Plec1	plectin	protein-coding
chr11	7454695	7455399	+	0	NA	Intergenic	Intergenic	-241124	NM_008343	16009	Mm.29254	NM_008343	ENSMUSG00000020427	Igfbp3	AI649005|IGFBP-3|IGgfbp3	insulin-like growth factor binding protein 3	protein-coding
chr15	99496965	99498644	+	0	NA	3' UTR (NM_028224, exon 12 of 12)	3' UTR (NM_028224, exon 12 of 12)	-23074	NM_029236	75284	Mm.32826	NM_029236	ENSMUSG00000037525	Bcdin3d	4930556P03Rik|AV138748	BCDIN3 domain containing	protein-coding
chr3	14599125	14599585	+	0	NA	intron (NM_007892, intron 3 of 7)	L1Md_T|LINE|L1	11866	NM_001347206	69126	Mm.389020	NM_001099674	ENSMUSG00000078784	Rbis	1810022K09Rik|AI746582|AL023036	ribosomal biogenesis factor	protein-coding
chr2	177512888	177513274	+	0	NA	TTS (NR_036450)	TTS (NR_036450)	14855	NR_036450	433520	Mm.425117	NM_001024825		Gm14403	-	predicted gene 14403	ncRNA
chr19	5648510	5649363	+	0	NA	TTS (NM_009045)	TTS (NM_009045)	11395	NM_009045	19697	Mm.249966	NM_009045	ENSMUSG00000024927	Rela	p65|p65 NF-kappa B|p65 NFkB	v-rel reticuloendotheliosis viral oncogene homolog A (avian)	protein-coding
chr11	6068243	6068531	+	0	NA	Intergenic	Intergenic	-2639	NM_001174053	12323	Mm.439733	NM_007595	ENSMUSG00000057897	Camk2b	CaMKII	calcium/calmodulin-dependent protein kinase II, beta	protein-coding
chr4	4310648	4311125	+	0	NA	Intergenic	ORR1F|LTR|ERVL-MaLR	-172071	NM_001348209	18619	Mm.475097	NM_001002927	ENSMUSG00000045573	Penk	AI326464|ENK|PPA|Penk1	preproenkephalin	protein-coding
chr5	142717979	142718617	+	0	NA	intron (NM_146257, intron 7 of 10)	intron (NM_146257, intron 7 of 10)	16197	NM_146257	243328	Mm.125942	NM_146257	ENSMUSG00000050822	Slc29a4	ENT4|mPMAT	solute carrier family 29 (nucleoside transporters), member 4	protein-coding
chr9	59518780	59519364	+	0	NA	exon (NM_178388, exon 5 of 5)	exon (NM_178388, exon 5 of 5)	6429	NM_178388	73893	Mm.216135	NM_178388	ENSMUSG00000049526	Tmem202	4930425N13Rik	transmembrane protein 202	protein-coding
chr11	97911152	97911690	+	0	NA	Intergenic	(TG)n|Simple_repeat|Simple_repeat	-27267	NM_001081435	72973	Mm.245939	NM_001081435	ENSMUSG00000070336	Fbxo47	2900052P03Rik|Gm1562	F-box protein 47	protein-coding
chr5	18916674	18917362	+	0	NA	Intergenic	Intergenic	309537	NR_102342	70832	Mm.398993	NR_102341	ENSMUSG00000097626	4921504A21Rik	-	RIKEN cDNA 4921504A21 gene	ncRNA
chr2	119841850	119842654	+	0	NA	Intergenic	Intergenic	42738	NM_019392	22174	Mm.2901	NM_019392	ENSMUSG00000027298	Tyro3	AI323366|Brt|Dtk|Etk-2|Rse|Sky|TK19-2|Tif|etk2/tyro3|tk19-1	TYRO3 protein tyrosine kinase 3	protein-coding
chr6	132439852	132440388	+	0	NA	Intergenic	Intergenic	-75985	NM_053251	114600	Mm.428480	NM_053251		Gm4736	EG114600|Mp4|Mp6	predicted gene 4736	protein-coding
chr5	118559604	118561403	+	0	NA	promoter-TSS (NM_001347445)	promoter-TSS (NM_001347445)	-216	NM_172424	76199	Mm.206238	NM_172424	ENSMUSG00000018076	Med13l	2210413I17Rik|6330591G05Rik|9030618F05Rik|Thrap2|Trap240L|mKIAA1025	mediator complex subunit 13-like	protein-coding
chr13	43271415	43272850	+	0	NA	intron (NM_001033399, intron 1 of 1)	intron (NM_001033399, intron 1 of 1)	32040	NM_001033399	328232	Mm.441399	NM_001033399	ENSMUSG00000051335	Gfod1	9630032O13|AI850995	glucose-fructose oxidoreductase domain containing 1	protein-coding
chr8	122777643	122778103	+	0	NA	intron (NM_144932, intron 1 of 9)	intron (NM_144932, intron 1 of 9)	2387	NM_144932	257633	Mm.334875	NM_144932	ENSMUSG00000015016	Acsf3	BB101783	acyl-CoA synthetase family member 3	protein-coding
chr12	69131917	69132414	+	0	NA	Intergenic	MLT1A1|LTR|ERVL-MaLR	27021	NM_009093	20090	Mm.379006	NM_009093	ENSMUSG00000034892	Rps29	-	ribosomal protein S29	protein-coding
chr11	101119496	101120418	+	0	NA	promoter-TSS (NM_028933)	promoter-TSS (NM_028933)	-116	NM_001361583	67998	Mm.33881	NM_026501	ENSMUSG00000017802	Retreg3	1300010M03Rik|4933404C01Rik|AI551748|Fam134c	reticulophagy regulator family member 3	protein-coding
chr1	116353480	116354287	+	0	NA	intron (NM_001371013, intron 13 of 23)	intron (NM_001371013, intron 13 of 23)	669146	NM_001371013
chr15	83002608	83003333	+	0	NA	intron (NM_001271411, intron 4 of 5)	intron (NM_001271411, intron 4 of 5)	20168	NM_028728	74039	Mm.32584	NM_028728	ENSMUSG00000058099	Nfam1	4921501M20Rik|Cnaip	Nfat activating molecule with ITAM motif 1	protein-coding
chr1	5130119	5130794	+	0	NA	intron (NM_133826, intron 9 of 13)	L1_Rod|LINE|L1	47370	NM_001310442	108664	Mm.27082	NM_133826	ENSMUSG00000033793	Atp6v1h	0710001F19Rik|AU022349|CGI-11|SFD|SFDalpha|SFDbeta|VMA13	ATPase, H+ transporting, lysosomal V1 subunit H	protein-coding
chr2	54903073	54903458	+	0	NA	intron (NM_173030, intron 8 of 12)	intron (NM_173030, intron 8 of 12)	466878	NM_173030	271786	Mm.330227	NM_173030	ENSMUSG00000060988	Galnt13	A230002A12|A230020F20|BB182356	polypeptide N-acetylgalactosaminyltransferase 13	protein-coding
chr14	96815441	96816218	+	0	NA	Intergenic	Lx7|LINE|L1	-296795	NM_053105	93688	Mm.308735	NM_053105	ENSMUSG00000022076	Klhl1	mKIAA1490	kelch-like 1	protein-coding
chr9	108187580	108190686	+	0	NA	intron (NM_007567, intron 1 of 11)	intron (NM_007567, intron 1 of 11)	1250	NM_007567	12217	Mm.20425	NM_007567	ENSMUSG00000032589	Bsn	-	bassoon	protein-coding
chrX	111534757	111535269	+	0	NA	intron (NM_025949, intron 1 of 24)	intron (NM_025949, intron 1 of 24)	2946	NM_025949	67071	Mm.37617	NM_025949	ENSMUSG00000025665	Rps6ka6	2610524K04Rik|RSK4|S6K-alpha-6	ribosomal protein S6 kinase polypeptide 6	protein-coding
chr2	180103199	180105642	+	0	NA	promoter-TSS (NR_102309)	promoter-TSS (NR_102309)	-13	NR_102309	99296	Mm.285360	NM_133849	ENSMUSG00000039059	Hrh3	AW049250|Eae8|H3R|HH3R	histamine receptor H3	protein-coding
chr9	121398287	121399284	+	0	NA	intron (NM_001357970, intron 2 of 15)	intron (NM_001357970, intron 2 of 15)	-4661	NM_001357968	67095	Mm.491112	NM_175114	ENSMUSG00000032536	Trak1	2310001H13Rik|AI413908|AI467545|hyrt|mKIAA1042	trafficking protein, kinesin binding 1	protein-coding
chr8	58147064	58147474	+	0	NA	intron (NM_175032, intron 4 of 11)	intron (NM_175032, intron 4 of 11)	-494214	NM_001167981	108150	Mm.62886	NM_144731	ENSMUSG00000031608	Galnt7	AI225872	polypeptide N-acetylgalactosaminyltransferase 7	protein-coding
chr7	45166941	45167498	+	0	NA	intron (NM_182993, intron 1 of 11)	intron (NM_182993, intron 1 of 11)	3298	NM_182993	72961	Mm.255631	NM_182993	ENSMUSG00000070570	Slc17a7	2900052E22Rik|AI851913|Vglut1	solute carrier family 17 (sodium-dependent inorganic phosphate cotransporter), member 7	protein-coding
chr12	57258208	57259003	+	0	NA	intron (NM_001164370, intron 1 of 9)	B4|SINE|B4	28180	NM_001164370	73490	Mm.268180	NM_001164370	ENSMUSG00000047022	Mipol1	1700081O04Rik|6030439O22Rik|AU021838|AW536152|D12Ertd19e	mirror-image polydactyly 1	protein-coding
chr11	118248307	118249142	+	0	NA	promoter-TSS (NM_011180)	promoter-TSS (NM_011180)	-132	NM_011180	19157	Mm.86413	NM_011180	ENSMUSG00000017132	Cyth1	CLM1|CTH-1|CYTIP|Pscd1	cytohesin 1	protein-coding
chr4	131435121	131435697	+	0	NA	Intergenic	RLTR16C_MM|LTR|ERVK	402869	NM_011214	19273	Mm.4860	NM_011214	ENSMUSG00000028909	Ptpru	Ftp-1|PCP-2|PTP|PTP-lambda|PTPlambda|Pcp2|Ptpf|Ptprl|R-PTP-U|R-PTP-psi|RPTPlambda	protein tyrosine phosphatase, receptor type, U	protein-coding
chr5	125177546	125180030	+	0	NA	intron (NM_001253904, intron 1 of 47)	CpG	426	NM_001253905	20602	Mm.278646	NM_011424	ENSMUSG00000029478	Ncor2	N-CoR|SMRT|SMRTe	nuclear receptor co-repressor 2	protein-coding
chr17	24960236	24961133	+	0	NA	promoter-TSS (NM_198937)	promoter-TSS (NM_198937)	-61	NM_198937	52009	Mm.371601	NM_198937	ENSMUSG00000024165	Jpt2	2810430B18Rik|AL022629|C16orf34|D17Ertd441e|Hn1l	Jupiter microtubule associated homolog 2	protein-coding
chr15	79502724	79503499	+	0	NA	intron (NM_008427, intron 1 of 1)	intron (NM_008427, intron 1 of 1)	2130	NM_008427	16520	Mm.39759	NM_008427	ENSMUSG00000044216	Kcnj4	IRK3|Kcnf2|MB-IRK3	potassium inwardly-rectifying channel, subfamily J, member 4	protein-coding
chr14	103898681	103899741	+	0	NA	Intergenic	Intergenic	-54735	NM_001136061	13618	Mm.229532	NM_007904	ENSMUSG00000022122	Ednrb	ET-B|ET-BR|ETR-b|ETb|Sox10m1	endothelin receptor type B	protein-coding
chr17	6827288	6828446	+	0	NA	Intergenic	CpG	-45087	NM_009510	22350	Mm.277812	NM_009510	ENSMUSG00000052397	Ezr	AW146364|R75297|Vil2|p81	ezrin	protein-coding
chr17	26451399	26452876	+	0	NA	Intergenic	Intergenic	37278	NM_001081656	240055	Mm.133211	NM_001081656	ENSMUSG00000034413	Neurl1b	C230078M08Rik|EG240055	neuralized E3 ubiquitin protein ligase 1B	protein-coding
chr11	76845408	76845945	+	0	NA	intron (NM_007754, intron 1 of 20)	intron (NM_007754, intron 1 of 20)	1332	NM_007754	12874	Mm.276736	NM_007754	ENSMUSG00000020841	Cpd	AA960140|AW322530|D830034L15Rik	carboxypeptidase D	protein-coding
chr5	139757899	139758739	+	0	NA	intron (NM_026748, intron 31 of 46)	intron (NM_026748, intron 31 of 46)	9624	NR_106004	102465628		NR_106004	ENSMUSG00000098574	Mir7037	Gm27447|mmu-mir-7037	microRNA 7037	ncRNA
chr4	24019178	24020129	+	0	NA	Intergenic	Intergenic	-476798	NM_199467	212377	Mm.120919	NM_199467	ENSMUSG00000045751	Mms22l	F730047E07Rik|Gm134	MMS22-like, DNA repair protein	protein-coding
chr13	57755845	57756867	+	0	NA	intron (NM_001166466, intron 2 of 11)	intron (NM_001166466, intron 2 of 11)	151976	NM_001166465	20745	Mm.379020	NM_009262	ENSMUSG00000056222	Spock1	Spock|Ticn1|testican	sparc/osteonectin, cwcv and kazal-like domains proteoglycan 1	protein-coding
chr7	16874582	16875661	+	0	NA	promoter-TSS (NM_001081655)	promoter-TSS (NM_001081655)	-196	NM_001081655	629378	Mm.491123	NM_001081655	ENSMUSG00000078794	Dact3	EG666671|naa-3	dishevelled-binding antagonist of beta-catenin 3	protein-coding
chr9	82114802	82115238	+	0	NA	intron (NM_001357477, intron 4 of 4)	intron (NM_001357477, intron 4 of 4)	251350	NM_001357477	75033	Mm.335329	NM_175213	ENSMUSG00000043289	Mei4	4930486G11Rik	meiotic double-stranded break formation protein 4	protein-coding
chr4	152141397	152142192	+	0	NA	intron (NM_207687, intron 2 of 15)	intron (NM_207687, intron 2 of 15)	-5469	NM_207690	56226	Mm.264215	NM_019585	ENSMUSG00000028943	Espn	je	espin	protein-coding
chr4	153716207	153717197	+	0	NA	Intergenic	Intergenic	233774	NR_040670	407793	Mm.260950	NR_040670		BC039966	-	cDNA sequence BC039966	ncRNA
chr8	59976835	59977705	+	0	NA	Intergenic	Intergenic	151621	NR_126087	75017	Mm.60775	NR_126087	ENSMUSG00000110406	4930470O06Rik	-	RIKEN cDNA 4930470O06 gene	ncRNA
chr5	87505875	87506543	+	0	NA	Intergenic	Intergenic	-15338	NM_053184	94215	Mm.26794	NM_053184	ENSMUSG00000106677	Ugt2a1	-	UDP glucuronosyltransferase 2 family, polypeptide A1	protein-coding
chr9	36553314	36553833	+	0	NA	Intergenic	MERVL_2A-int|LTR|ERVL	-11610	NM_001033783	434396	Mm.118836	NM_001033783	ENSMUSG00000074448	Pate9	EG434396|Gm5615|Pate-H	prostate and testis expressed 9	protein-coding
chr4	149988760	149989589	+	0	NA	intron (NM_173371, intron 3 of 4)	intron (NM_173371, intron 3 of 4)	14062	NM_001291004	100198	Mm.22183	NM_173371	ENSMUSG00000028980	H6pd	AI785303|G6pd1|Gpd-1|Gpd1	hexose-6-phosphate dehydrogenase (glucose 1-dehydrogenase)	protein-coding
chr7	44602269	44602938	+	0	NA	3' UTR (NM_008422, exon 4 of 4)	3' UTR (NM_008422, exon 4 of 4)	11717	NM_001290682	16504	Mm.40312	NM_008422	ENSMUSG00000062785	Kcnc3	KShIIID|Kcr2-3|Kv3.3	potassium voltage gated channel, Shaw-related subfamily, member 3	protein-coding
chr11	118916472	118917090	+	0	NA	Intergenic	Intergenic	-5184	NM_001285437	52897	Mm.341103	NM_001024931	ENSMUSG00000025576	Rbfox3	Fox-3|Hrnbp3|NeuN|Neuna60	RNA binding protein, fox-1 homolog (C. elegans) 3	protein-coding
chr17	27678955	27679626	+	0	NA	intron (NM_001286744, intron 1 of 9)	intron (NM_001286744, intron 1 of 9)	-5949	NM_178365	23969	Mm.4926	NM_011861	ENSMUSG00000040276	Pacsin1	A830061D09Rik|H74|mKIAA1379|syndapin	protein kinase C and casein kinase substrate in neurons 1	protein-coding
chr2	163946291	163946621	+	0	NA	Intergenic	Intergenic	-27773	NM_183023	241770	Mm.330760	NM_183023	ENSMUSG00000035226	Rims4	6530406L02|Rim4	regulating synaptic membrane exocytosis 4	protein-coding
chr4	30809462	30810255	+	0	NA	intron (NR_040655, intron 4 of 6)	intron (NR_040655, intron 4 of 6)	145262	NR_040655	75332	Mm.108636	NR_040655		4930556G01Rik	-	RIKEN cDNA 4930556G01 gene	ncRNA
chr11	3710278	3710893	+	0	NA	intron (NM_001363164, intron 11 of 12)	intron (NM_001363164, intron 11 of 12)	11642	NM_001302630	74309	Mm.61022	NM_152818	ENSMUSG00000020435	Osbp2	1700095P05Rik|C630001G20Rik|Gm244|ORP-4|OSBPL1	oxysterol binding protein 2	protein-coding
chr2	153014983	153015736	+	0	NA	promoter-TSS (NM_178939)	promoter-TSS (NM_178939)	24	NM_178939	68559	Mm.12746	NM_178939	ENSMUSG00000027472	Pdrg1	1110004D19Rik|AU020945|AV006589|Pdrg	p53 and DNA damage regulated 1	protein-coding
chr11	99023996	99024794	+	0	NA	promoter-TSS (NM_011623)	promoter-TSS (NM_011623)	-206	NM_011623	21973	Mm.4237	NM_011623	ENSMUSG00000020914	Top2a	Top-2	topoisomerase (DNA) II alpha	protein-coding
chr10	81229772	81231324	+	0	NA	5' UTR (NM_178662, exon 1 of 13)	5' UTR (NM_178662, exon 1 of 13)	238	NM_178662	16467	Mm.127681	NM_178662	ENSMUSG00000034958	Atcay	3322401A10Rik|BB077577|BNIP-H|CLAC|hes|ji	ataxia, cerebellar, Cayman type	protein-coding
chr17	34024265	34025284	+	0	NA	promoter-TSS (NM_009066)	promoter-TSS (NM_009066)	-94	NM_009066	19763	Mm.20343	NM_009066	ENSMUSG00000024325	Ring1	Ring1A	ring finger protein 1	protein-coding
chr7	111454452	111454844	+	0	NA	Intergenic	Intergenic	325329	NM_173739	233733	Mm.323322	NM_173739	ENSMUSG00000038296	Galnt18	2900011G21Rik|BC024988|Galntl4|galNAc-T18|mpp-GalNAc-T18(O18)	polypeptide N-acetylgalactosaminyltransferase 18	protein-coding
chr8	103644126	103644414	+	0	NA	intron (NR_045730, intron 3 of 4)	intron (NR_045730, intron 3 of 4)	40471	NR_045730	71058	Mm.67707	NR_045730	ENSMUSG00000110336	4933400L20Rik	-	RIKEN cDNA 4933400L20 gene	ncRNA
chr5	56612170	56612601	+	0	NA	Intergenic	Intergenic	1105534	NR_015588	319216	Mm.332387	NR_015588	ENSMUSG00000097216	4932441J04Rik	-	RIKEN cDNA 4932441J04 gene	ncRNA
chr18	16475315	16476128	+	0	NA	Intergenic	Intergenic	333525	NM_007664	12558	Mm.257437	NM_007664	ENSMUSG00000024304	Cdh2	CDHN|N-CAD|Ncad	cadherin 2	protein-coding
chr16	6182242	6182831	+	0	NA	intron (NM_001359725, intron 2 of 16)	intron (NM_001359725, intron 2 of 16)	206949	NR_045799	68238	Mm.434605	NR_045799	ENSMUSG00000101481	1700123O21Rik	-	RIKEN cDNA 1700123O21 gene	ncRNA
chr5	113015247	113015931	+	0	NA	promoter-TSS (NM_001285806)	promoter-TSS (NM_001285806)	-51	NM_177078	320129	Mm.285619	NM_177078	ENSMUSG00000042249	Grk3	4833444A01Rik|AI851927|AW551196|Adrbk-2|Adrbk2|Bark-2	G protein-coupled receptor kinase 3	protein-coding
chr11	106391816	106392289	+	0	NA	Intergenic	Intergenic	-9271	NM_010494	15896	Mm.394	NM_010494	ENSMUSG00000001029	Icam2	CD102|Icam-2|Ly-60	intercellular adhesion molecule 2	protein-coding
chr2	28369674	28370586	+	0	NA	Intergenic	Intergenic	-76716	NM_001005420	241289	Mm.330095	NM_001005420	ENSMUSG00000035829	Ppp1r26	Gm347|Kiaa0649|mKIAA0649	protein phosphatase 1, regulatory subunit 26	protein-coding
chr5	16552606	16554129	+	0	NA	promoter-TSS (NM_001289461)	promoter-TSS (NM_001289461)	-128	NM_001289458	15234	Mm.267078	NM_010427	ENSMUSG00000028864	Hgf	C230052L06Rik|HGF/SF|NK1|NK2|SF|SF/HGF	hepatocyte growth factor	protein-coding
chr11	3780027	3780422	+	0	NA	intron (NM_152818, intron 2 of 13)	ORR1C2-int|LTR|ERVL-MaLR	-5556	NM_001363164	74309	Mm.61022	NM_152818	ENSMUSG00000020435	Osbp2	1700095P05Rik|C630001G20Rik|Gm244|ORP-4|OSBPL1	oxysterol binding protein 2	protein-coding
chr15	81925746	81926692	+	0	NA	promoter-TSS (NM_030229)	promoter-TSS (NM_030229)	-6	NM_030229	78929	Mm.215115	NM_030229	ENSMUSG00000022476	Polr3h	5031409G22Rik|RPC8	polymerase (RNA) III (DNA directed) polypeptide H	protein-coding
chr13	55622412	55623497	+	0	NA	promoter-TSS (NM_007596)	promoter-TSS (NM_007596)	-51	NM_007596	12328	Mm.2313	NM_007596	ENSMUSG00000021501	Caml	AI385748|Camlg	calcium modulating ligand	protein-coding
chr5	111908103	111908437	+	0	NA	Intergenic	Intergenic	-146542	NR_045832	269683	Mm.136946	NM_207252	ENSMUSG00000085271	E130006D01Rik	Gm16018|Gm681	RIKEN cDNA E130006D01 gene	ncRNA
chr12	38405986	38406538	+	0	NA	intron (NM_178681, intron 20 of 24)	intron (NM_178681, intron 20 of 24)	208259	NR_045943	73867	Mm.78933	NR_045943	ENSMUSG00000112967	4930428E07Rik	-	RIKEN cDNA 4930428E07 gene	ncRNA
chr8	54163405	54164093	+	0	NA	intron (NM_009506, intron 3 of 6)	intron (NM_009506, intron 3 of 6)	86217	NM_009506	22341	Mm.1402	NM_009506	ENSMUSG00000031520	Vegfc	AW228853|VEGF-C	vascular endothelial growth factor C	protein-coding
chr10	45887195	45887484	+	0	NA	Intergenic	Intergenic	79635	NR_040624	320363	Mm.123343	NR_040624	ENSMUSG00000110874	D030045P18Rik	-	RIKEN cDNA D030045P18 gene	ncRNA
chr11	77764376	77765088	+	0	NA	Intergenic	Intergenic	-12503	NM_001291212	360013	Mm.341248	NM_011586	ENSMUSG00000000631	Myo18a	MAJN|MyoPDZ|MysPDZ|SP-R210	myosin XVIIIA	protein-coding
chr11	102195867	102196503	+	0	NA	intron (NM_001361596, intron 26 of 27)	intron (NM_001361596, intron 26 of 27)	6486	NM_175935	68401	Mm.22385	NM_175935	ENSMUSG00000034793	G6pc3	0710001K01Rik|AU019276|AU045429|AV128920|AW545836|UGRP	glucose 6 phosphatase, catalytic, 3	protein-coding
chr17	24494755	24495094	+	0	NA	intron (NM_001360469, intron 1 of 17)	intron (NM_001360469, intron 1 of 17)	6141	NM_027937	268932	Mm.70989	NM_027937	ENSMUSG00000033597	Caskin1	3300002N10Rik|C130061I24|C630036E02Rik|mKIAA1306	CASK interacting protein 1	protein-coding
chr8	15322815	15323809	+	0	NA	Intergenic	L1M2|LINE|L1	265659	NM_008664	17930	Mm.272115	NM_008664	ENSMUSG00000031461	Myom2	AW146149	myomesin 2	protein-coding
chr4	50459379	50460012	+	0	NA	Intergenic	Intergenic	-613926	NM_001033351	242443	Mm.440095	NM_001033351	ENSMUSG00000039579	Grin3a	6430537F04|A830097C19Rik|NMDAR-L|NR3A|mKIAA1973	glutamate receptor ionotropic, NMDA3A	protein-coding
chr9	112251354	112252167	+	0	NA	intron (NR_033432, intron 1 of 3)	L1M5|LINE|L1	-4814	NR_033433	620760	Mm.259863	NR_015468	ENSMUSG00000087038	2900079G21Rik	C130083B14|Gm6179	RIKEN cDNA 2900079G21 gene	ncRNA
chr9	50741129	50741836	+	0	NA	intron (NM_025865, intron 2 of 3)	intron (NM_025865, intron 2 of 3)	-3747	NM_001311069	330938	Mm.82598	NM_178118	ENSMUSG00000032064	Dixdc1	4930563F16Rik|BC048182|Ccd1|Ccd1Aalpha1L|Ccd1Abeta1L|Ccd1BalphaL|Ccd1BbetaL|Ccd1CL|mKIAA1735	DIX domain containing 1	protein-coding
chr2	139362461	139363373	+	0	NA	Intergenic	Intergenic	-130996	NM_001356507	228677	Mm.100450	NM_175467	ENSMUSG00000039092	Sptlc3	C130053K05Rik	serine palmitoyltransferase, long chain base subunit 3	protein-coding
chr5	116591406	116592492	+	0	NA	promoter-TSS (NM_026886)	promoter-TSS (NM_026886)	-132	NM_026886	68955	Mm.146779	NM_026886	ENSMUSG00000063919	Srrm4	1500001A10Rik|B230202K19Rik|bv|mKIAA1853|nSR100	serine/arginine repetitive matrix 4	protein-coding
chr16	5254415	5254751	+	0	NA	intron (NM_027446, intron 1 of 7)	intron (NM_027446, intron 1 of 7)	1373	NM_027446	70511	Mm.45780	NM_027446	ENSMUSG00000022544	Eef2kmt	5730409G15Rik|Fam86|Fam86a|eEF2-KMT	eukaryotic elongation factor 2 lysine methyltransferase	protein-coding
chr16	8540632	8541324	+	0	NA	intron (NM_172961, intron 1 of 15)	intron (NM_172961, intron 1 of 15)	27549	NM_172961	268860	Mm.259315	NM_172961	ENSMUSG00000057880	Abat	9630038C02Rik|AI255750|Gabaat|Gabat|Gm9851|I54|Laibat|X61497	4-aminobutyrate aminotransferase	protein-coding
chr9	58822456	58823529	+	0	NA	promoter-TSS (NM_001081192)	promoter-TSS (NM_001081192)	43	NM_001081192	330953	Mm.151967	NM_001081192	ENSMUSG00000032338	Hcn4	Bcng3|Hcn3	hyperpolarization-activated, cyclic nucleotide-gated K+ 4	protein-coding
chr7	98729271	98730444	+	0	NA	Intergenic	Intergenic	26610	NM_001355114	72981	Mm.4428	NM_028410	ENSMUSG00000030753	Thap12	2900052B10Rik|Dap4|Prkrir|Rpkrir	THAP domain containing 12	protein-coding
chr14	89919963	89920431	+	0	NA	Intergenic	L1_Mus2|LINE|L1	23973	NR_002862	328451	Mm.320571	NR_002862		Gm5088	EG328451|Pabpc4l	poly(A)-binding protein, cytoplasmic pseudogene	pseudo
chr9	108432793	108433503	+	0	NA	Intergenic	ID4_|SINE|ID	-3334	NM_001004192	434439	Mm.78372	NM_001004192	ENSMUSG00000050641	BC048562	-	cDNA sequence BC048562	protein-coding
chr19	6571396	6571916	+	0	NA	Intergenic	RMER19B|LTR|ERVK	-28586	NM_009203	20521	Mm.391146	NM_009203	ENSMUSG00000061742	Slc22a12	AI987855|OAT4L|Rst|Slc22al2|URAT1	solute carrier family 22 (organic anion/cation transporter), member 12	protein-coding
chr2	166664509	166664792	+	0	NA	intron (NM_177782, intron 1 of 39)	intron (NM_177782, intron 1 of 39)	49182	NM_177782	277360	Mm.34420	NM_177782	ENSMUSG00000039621	Prex1	G630042G04|P-REX1|Setd6	phosphatidylinositol-3,4,5-trisphosphate-dependent Rac exchange factor 1	protein-coding
chr5	124018688	124019759	+	0	NA	intron (NM_177876, intron 1 of 3)	intron (NM_177876, intron 1 of 3)	13037	NM_177876	330192	Mm.4079	NM_177876	ENSMUSG00000066278	Vps37b	2300007F24Rik|AI415429|BC026744	vacuolar protein sorting 37B	protein-coding
chr14	83348331	83348956	+	0	NA	Intergenic	Intergenic	726647	NR_153783	102635012	Mm.399509	NR_153783	ENSMUSG00000115043	Gm32455	-	predicted gene, 32455	ncRNA
chr7	126287784	126288716	+	0	NA	intron (NM_145587, intron 1 of 3)	intron (NM_145587, intron 1 of 3)	15754	NM_145587	104175	Mm.29660	NM_145587	ENSMUSG00000042978	Sbk1	Sbk	SH3-binding kinase 1	protein-coding
chr10	38306535	38306911	+	0	NA	Intergenic	Intergenic	130949	NR_131035	75877	Mm.402094	NR_131035	ENSMUSG00000111234	4930591E09Rik	-	RIKEN cDNA 4930591E09 gene	ncRNA
chr5	124996808	124997433	+	0	NA	Intergenic	Intergenic	-6328	NM_028443	73121	Mm.296138	NM_028443	ENSMUSG00000037962	Rflna	3110032G18Rik|Fam101a|cfm|cfm2	refilin A	protein-coding
chr15	81729246	81730439	+	0	NA	promoter-TSS (NM_011241)	promoter-TSS (NM_011241)	77	NM_001358622	19387	Mm.270975	NM_011241	ENSMUSG00000022391	Rangap1	C79654|Fug1|mKIAA1835	RAN GTPase activating protein 1	protein-coding
chr1	163607181	163607776	+	0	NA	Intergenic	Intergenic	117754	NM_001143956	240879	Mm.484621	NM_001143956	ENSMUSG00000040113	Mettl11b	Gm207|NTM1B	methyltransferase like 11B	protein-coding
chr10	47991755	47992055	+	0	NA	Intergenic	RMER17C|LTR|ERVK	1747157	NR_028274	100302593		NR_028274	ENSMUSG00000095118	Snord14d	Gm23710	small nucleolar RNA, C/D box 14D	snoRNA
chr5	136244558	136245624	+	0	NA	promoter-TSS (NM_001302939)	promoter-TSS (NM_001302939)	-151	NM_001302939	23921	Mm.425294	NM_018825	ENSMUSG00000005057	Sh2b2	Aps	SH2B adaptor protein 2	protein-coding
chr4	139446090	139446559	+	0	NA	intron (NM_001160319, intron 63 of 105)	intron (NM_001160319, intron 63 of 105)	65665	NM_001160319	69116	Mm.271956	NM_001160319	ENSMUSG00000066036	Ubr4	1810009A16Rik|A930005E13Rik|D930005K06Rik|Gm1032|Gm1666|N28143|RBAF600|Zubr1|mKIAA0462|p600	ubiquitin protein ligase E3 component n-recognin 4	protein-coding
chr7	122779479	122780045	+	0	NA	Intergenic	CR1_Mam|LINE|CR1	108018	NM_019430	54376	Mm.444212	NM_019430	ENSMUSG00000066189	Cacng3	-	calcium channel, voltage-dependent, gamma subunit 3	protein-coding
chr2	33200051	33200473	+	0	NA	intron (NM_175211, intron 8 of 19)	intron (NM_175211, intron 8 of 19)	-15699	NM_011923	26360	Mm.208919	NM_011923	ENSMUSG00000004105	Angptl2	AI593246|AW260363|Arp2	angiopoietin-like 2	protein-coding
chr15	18065096	18066163	+	0	NA	Intergenic	Intergenic	303998	NR_045711	70886	Mm.399021	NR_045711	ENSMUSG00000098150	4921515E04Rik	-	RIKEN cDNA 4921515E04 gene	ncRNA
chr16	13160077	13160624	+	0	NA	Intergenic	Intergenic	50614	NM_015769	50505	Mm.287837	NM_015769	ENSMUSG00000022545	Ercc4	AI606920|Xpf	excision repair cross-complementing rodent repair deficiency, complementation group 4	protein-coding
chr7	142371077	142372558	+	0	NA	intron (NM_001347541, intron 1 of 2)	intron (NM_001347541, intron 1 of 2)	442	NM_177265	320802	Mm.154486	NM_177265	ENSMUSG00000045777	Ifitm10	6330512M04Rik|AI848576|DSPA3	interferon induced transmembrane protein 10	protein-coding
chr6	129095084	129095616	+	0	NA	intron (NM_153506, intron 2 of 4)	intron (NM_153506, intron 2 of 4)	5553	NM_153506	232409	Mm.30870	NM_153506	ENSMUSG00000030155	Clec2e	Clra|clr-a	C-type lectin domain family 2, member e	protein-coding
chrX	121654567	121655181	+	0	NA	Intergenic	Intergenic	742511	NM_138742	54561	Mm.490573	NM_138742	ENSMUSG00000055733	Nap1l3	MB20	nucleosome assembly protein 1-like 3	protein-coding
chr2	156614925	156615580	+	0	NA	intron (NM_001277187, intron 1 of 11)	intron (NM_001277187, intron 1 of 11)	1555	NM_001277187	228836	Mm.22094	NM_146128	ENSMUSG00000061689	Dlgap4	AI225853|BC024558|DAP-4|DAP4|SAPAP-4|Sapap4|WBP16	DLG associated protein 4	protein-coding
chr10	81001143	81001507	+	0	NA	promoter-TSS (NM_001038655)	promoter-TSS (NM_001038655)	40	NM_001038655	14708	Mm.222496	NM_010319	ENSMUSG00000048240	Gng7	AI840417	guanine nucleotide binding protein (G protein), gamma 7	protein-coding
chr13	59022146	59023116	+	0	NA	intron (NM_001025074, intron 13 of 17)	intron (NM_001025074, intron 13 of 17)	214934	NM_001025074	18212	Mm.130054	NM_008745	ENSMUSG00000055254	Ntrk2	GP145-TrkB/GP95-TrkB|Tkrb|trk-B|trkB	neurotrophic tyrosine kinase, receptor, type 2	protein-coding
chr12	65187349	65188007	+	0	NA	Intergenic	Intergenic	-15098	NM_172578	217653	Mm.21144	NM_172578	ENSMUSG00000047534	Mis18bp1	6720403H11|C79407|Knl2|mKIAA1903	MIS18 binding protein 1	protein-coding
chr12	86882245	86883345	+	0	NA	exon (NM_145836, exon 1 of 1)	exon (NM_145836, exon 1 of 1)	2019	NM_145836	238330	Mm.248358	NM_145836	ENSMUSG00000034168	Irf2bpl	6430527G18Rik|Eap1	interferon regulatory factor 2 binding protein-like	protein-coding
chr7	122297491	122297893	+	0	NA	intron (NM_001316672, intron 2 of 16)	intron (NM_001316672, intron 2 of 16)	8567	NM_001316672	18751	Mm.207496	NM_008855	ENSMUSG00000052889	Prkcb	PKC-B|PKC-Beta|Pkcb|Prkcb1|Prkcb2	protein kinase C, beta	protein-coding
chr7	80840779	80841420	+	0	NA	Intergenic	MLTR14|LTR|ERV1	-21009	NM_009553	22691	Mm.358645	NM_009553	ENSMUSG00000038797	Zscan2	Zfp-29|Zfp29	zinc finger and SCAN domain containing 2	protein-coding
chr8	120288022	120288880	+	0	NA	Intergenic	Intergenic	-60221	NR_110496	434353	Mm.411793	NR_110496	ENSMUSG00000097960	A330074K22Rik	-	RIKEN cDNA A330074K22 gene	ncRNA
chr14	115633023	115633714	+	0	NA	intron (NM_175500, intron 6 of 7)	intron (NM_175500, intron 6 of 7)	-223816	NR_045761	75088	Mm.444706	NR_045761	ENSMUSG00000093551	4930505G20Rik	-	RIKEN cDNA 4930505G20 gene	ncRNA
chr1	31029006	31029520	+	0	NA	intron (NR_136907, intron 2 of 3)	MTD|LTR|ERVL-MaLR	67191	NR_136907	102634473	Mm.484482	NR_136907	ENSMUSG00000086727	Gm29669	-	predicted gene 29669	ncRNA
chr8	119632888	119633403	+	0	NA	exon (NM_025734, exon 2 of 3)	exon (NM_025734, exon 2 of 3)	2535	NM_001357210	66733	Mm.358699	NM_025734	ENSMUSG00000045246	Kcng4	4921535I01Rik|AW049024|KV6.3|KV6.4	potassium voltage-gated channel, subfamily G, member 4	protein-coding
chr17	28415185	28415575	+	0	NA	intron (NM_010220, intron 6 of 10)	intron (NM_010220, intron 6 of 10)	-50164	NM_021478	22157	Mm.42102	NM_021478	ENSMUSG00000037446	Tulp1	Tulp1l	tubby like protein 1	protein-coding
chr11	8980705	8981424	+	0	NA	Intergenic	MER34|LTR|ERV1	30127	NM_008316	15574	Mm.42201	NM_008316	ENSMUSG00000020413	Hus1	-	HUS1 checkpoint clamp component	protein-coding
chr5	111228101	111229052	+	0	NA	intron (NM_001267622, intron 8 of 22)	intron (NM_001267622, intron 8 of 22)	-102121	NM_001301666	56305	Mm.200516	NM_019640	ENSMUSG00000050017	Pitpnb	PI-TP-beta	phosphatidylinositol transfer protein, beta	protein-coding
chr10	96397908	96398949	+	0	NA	Intergenic	Intergenic	172221	NR_110448	74881	Mm.410819	NR_110448	ENSMUSG00000112762	4930459C07Rik	-	RIKEN cDNA 4930459C07 gene	ncRNA
chr5	71135836	71136249	+	0	NA	Intergenic	Lx10|LINE|L1	-40193	NM_008066	14395	Mm.5304	NM_008066	ENSMUSG00000000560	Gabra2	C630048P16Rik|Gabra-2	gamma-aminobutyric acid (GABA) A receptor, subunit alpha 2	protein-coding
chr8	84664838	84665651	+	0	NA	Intergenic	Intergenic	-2392	NM_010499	15936	Mm.399	NM_010499	ENSMUSG00000053560	Ier2	AI317238|Ch1|Pip92	immediate early response 2	protein-coding
chr11	116653603	116654091	+	0	NA	exon (NM_030206, exon 1 of 4)	exon (NM_030206, exon 1 of 4)	466	NM_030206	114886	Mm.34598	NM_030206	ENSMUSG00000020810	Cygb	3110001K20Rik|HGb|Staap	cytoglobin	protein-coding
chr2	46615969	46616442	+	0	NA	Intergenic	Intergenic	919600	NR_040497	69405	Mm.396184	NR_040497	ENSMUSG00000086202	1700019E08Rik	-	RIKEN cDNA 1700019E08 gene	ncRNA
chrX	50081857	50082417	+	0	NA	Intergenic	L1ME3|LINE|L1	-71902	NM_146390	258385	Mm.377470	NM_146390	ENSMUSG00000050504	Olfr1323	MOR216-1	olfactory receptor 1323	protein-coding
chr5	36464505	36465477	+	0	NA	promoter-TSS (NR_126489)	promoter-TSS (NR_126489)	-137	NR_126488	76710	Mm.165495	NR_126488	ENSMUSG00000039563	2210406O10Rik	-	RIKEN cDNA 2210406O10 gene	ncRNA
chr14	110671447	110671931	+	0	NA	Intergenic	Lx7|LINE|L1	83460	NM_175499	239250	Mm.49728	NM_175499	ENSMUSG00000045871	Slitrk6	4832410J21Rik|Sltk6	SLIT and NTRK-like family, member 6	protein-coding
chr4	153373014	153373541	+	0	NA	TTS (NM_001099299)	TTS (NM_001099299)	109553	NM_001099299	230959	Mm.318874	NM_001099299	ENSMUSG00000039546	Ajap1	Gm573	adherens junction associated protein 1	protein-coding
chr4	119981143	119981847	+	0	NA	intron (NM_010657, intron 1 of 8)	intron (NM_010657, intron 1 of 8)	166817	NM_010657	16656	Mm.302758	NM_010657	ENSMUSG00000028634	Hivep3	2900056N03Rik|A130075N07|AI848000|E030045D18Rik|KBP-1|KBP1|Krc|Rc|Schnurri-3|Shn3|Zas3	human immunodeficiency virus type I enhancer binding protein 3	protein-coding
chr6	114892211	114892875	+	0	NA	intron (NM_001356371, intron 2 of 5)	intron (NM_001356371, intron 2 of 5)	29278	NM_177683	232334	Mm.268357	NM_177683	ENSMUSG00000030315	Vgll4	BC048841|VGL-4	vestigial like family member 4	protein-coding
chr5	115724354	115724949	+	0	NA	exon (NM_001080808, exon 2 of 9)	exon (NM_001080808, exon 2 of 9)	6970	NM_001080808	75665	Mm.233914	NM_001080808	ENSMUSG00000041609	Bicdl1	2210403N09Rik|BICDR-1|Ccdc64	BICD family like cargo adaptor 1	protein-coding
chr5	135035505	135036353	+	0	NA	intron (NM_001359179, intron 1 of 8)	intron (NM_001359179, intron 1 of 8)	12447	NM_001359179	20907	Mm.6225	NM_016801	ENSMUSG00000007207	Stx1a	HPC-1	syntaxin 1A (brain)	protein-coding
chr5	143410648	143411863	+	0	NA	intron (NM_025841, intron 1 of 4)	intron (NM_025841, intron 1 of 4)	7435	NM_025841	66913	Mm.181880	NM_025841	ENSMUSG00000079111	Kdelr2	1110007A14Rik	KDEL (Lys-Asp-Glu-Leu) endoplasmic reticulum protein retention receptor 2	protein-coding
chr2	167931901	167932802	+	0	NA	promoter-TSS (NM_011201)	promoter-TSS (NM_011201)	24	NM_011201	19246	Mm.277916	NM_011201	ENSMUSG00000027540	Ptpn1	PTP-1B|PTP-HA2|PTP1B	protein tyrosine phosphatase, non-receptor type 1	protein-coding
chr1	14675332	14675822	+	0	NA	Intergenic	Intergenic	80389	NM_001360810	17681	Mm.5820	NM_010827	ENSMUSG00000025930	Msc	MyoR|bHLHa22	musculin	protein-coding
chr10	30760554	30760909	+	0	NA	intron (NM_001358842, intron 2 of 14)	intron (NM_001358842, intron 2 of 14)	42595	NM_001358841	211329	Mm.297903	NM_172495	ENSMUSG00000039697	Ncoa7	9030406N13Rik	nuclear receptor coactivator 7	protein-coding
chr15	73451670	73452583	+	0	NA	Intergenic	Intergenic	-28935	NM_001358045	14083	Mm.254494	NM_007982	ENSMUSG00000022607	Ptk2	FADK 1|FAK|FRNK|Fadk|p125FAK	PTK2 protein tyrosine kinase 2	protein-coding
chr4	138978869	138979313	+	0	NA	intron (NM_029857, intron 2 of 16)	intron (NM_029857, intron 2 of 16)	6186	NM_029857	77056	Mm.122336	NM_029857	ENSMUSG00000041143	Tmco4	4632413C14Rik|AI430825	transmembrane and coiled-coil domains 4	protein-coding
chr4	43678599	43679147	+	0	NA	intron (NM_001368841, intron 4 of 12)	intron (NM_001368841, intron 4 of 12)	9566	NM_001368841	242409	Mm.171489	NM_001085508	ENSMUSG00000078716	Tmem8b	4930500O05Rik	transmembrane protein 8B	protein-coding
chr3	119387496	119388277	+	0	NA	intron (NM_170778, intron 20 of 22)	intron (NM_170778, intron 20 of 22)	395502	NM_001310711	56195	Mm.29966	NM_019550	ENSMUSG00000028134	Ptbp2	Ptb2|brPTB|nPTB	polypyrimidine tract binding protein 2	protein-coding
chr2	26398351	26399281	+	0	NA	intron (NR_110957, intron 8 of 9)	intron (NR_110957, intron 8 of 9)	9468	NM_173180	66865	Mm.250359	NM_173180	ENSMUSG00000026926	Pmpca	1200002L24Rik|4933435E07Rik|Alpha-MPP|P-55	peptidase (mitochondrial processing) alpha	protein-coding
chr2	123504000	123504431	+	0	NA	Intergenic	Intergenic	-585754	NM_001290997	214968	Mm.330536	NM_172537	ENSMUSG00000027200	Sema6d	1110067B02Rik|AA409156|D330011G23|mKIAA1479	sema domain, transmembrane domain (TM), and cytoplasmic domain, (semaphorin) 6D	protein-coding
chr3	75164490	75165415	+	0	NA	Intergenic	Intergenic	-21180	NM_172515	213234	Mm.80075	NM_172515	ENSMUSG00000034151	Zbbx	4931432L23	zinc finger, B-box domain containing	protein-coding
chr11	114257541	114258617	+	0	NA	Intergenic	Intergenic	59821	NR_045930	73536	Mm.54275	NR_045930	ENSMUSG00000078600	1700092K14Rik	-	RIKEN cDNA 1700092K14 gene	ncRNA
chr10	127564182	127564899	+	0	NA	intron (NM_008512, intron 41 of 88)	intron (NM_008512, intron 41 of 88)	-29981	NM_183297	104080	Mm.437200	NM_183297	ENSMUSG00000040258	Nxph4	1110036M10Rik|AI851051	neurexophilin 4	protein-coding
chr10	46193865	46194536	+	0	NA	Intergenic	Eulor6B|DNA?|DNA?	-50548	NR_028274	100302593		NR_028274	ENSMUSG00000095118	Snord14d	Gm23710	small nucleolar RNA, C/D box 14D	snoRNA
chr2	120730840	120731970	+	0	NA	intron (NM_026891, intron 1 of 27)	CpG	112	NM_026891	68968	Mm.2289	NM_026891	ENSMUSG00000027284	Cdan1	1500015A01Rik|AI448026|AW492297|CDA-I|CDA1|CDAI	congenital dyserythropoietic anemia, type I (human)	protein-coding
chr7	45202491	45203127	+	0	NA	intron (NM_201374, intron 1 of 19)	RLTR53_Mm|LTR|ERVK	2083	NM_201374	384619	Mm.214931	NM_201374	ENSMUSG00000038292	Ccdc155	Gm1434|KASH5	coiled-coil domain containing 155	protein-coding
chr2	157478521	157479254	+	0	NA	Intergenic	Intergenic	54594	NM_001025395	20779	Mm.22845	NM_009271	ENSMUSG00000027646	Src	AW259666|pp60c-src	Rous sarcoma oncogene	protein-coding
chr7	34888806	34889272	+	0	NA	Intergenic	L4_C_Mam|LINE|RTE-X	-23368	NM_008820	18624	Mm.69751	NM_008820	ENSMUSG00000063931	Pepd	Pep-4|Pep4|dal	peptidase D	protein-coding
chr6	86732355	86733733	+	0	NA	exon (NM_011818, exon 1 of 14)	exon (NM_011818, exon 1 of 14)	334	NM_011818	23885	Mm.321452	NM_011818	ENSMUSG00000001157	Gmcl1	2810049L19Rik|Btbd13|DIP|Gcl|Gcl-1|glc-1|mglc-1	germ cell-less, spermatogenesis associated 1	protein-coding
chr1	83015228	83015795	+	0	NA	intron (NM_030556, intron 5 of 6)	intron (NM_030556, intron 5 of 6)	22937	NM_030556	80721	Mm.261542	NM_030556	ENSMUSG00000038496	Slc19a3	A230084E24Rik|AI788884|ThTr2	solute carrier family 19, member 3	protein-coding
chr2	31382950	31383556	+	0	NA	intron (NM_001370902, intron 26 of 97)	intron (NM_001370902, intron 26 of 97)	68921	NM_001370902	665700	Mm.80703	NM_177649	ENSMUSG00000055632	Hmcn2	D030068H01	hemicentin 2	protein-coding
chr9	43482023	43482697	+	0	NA	Intergenic	Intergenic	171597	NM_023655	72169	Mm.273277	NM_023655	ENSMUSG00000032013	Trim29	1110047J21Rik|2810431N19Rik|4732461M22Rik|AI119726	tripartite motif-containing 29	protein-coding
chr2	13416661	13417458	+	0	NA	intron (NM_001081084, intron 27 of 66)	intron (NM_001081084, intron 27 of 66)	74817	NM_001081084	65969	Mm.313915	NM_001081084	ENSMUSG00000026726	Cubn	AA408369|AL022750|D2Wsu88e	cubilin (intrinsic factor-cobalamin receptor)	protein-coding
chr15	102733266	102734423	+	0	NA	Intergenic	Intergenic	-11666	NM_026192	67488	Mm.71682	NM_026192	ENSMUSG00000023055	Calcoco1	1810009B06Rik|Cocoa|Gcap11|mKIAA1536	calcium binding and coiled coil domain 1	protein-coding
chr7	30457029	30458206	+	0	NA	promoter-TSS (NM_172898)	promoter-TSS (NM_172898)	-102	NM_172898	243911	Mm.113908	NM_172898	ENSMUSG00000036915	Kirrel2	C330019F22Rik|NEPH3|NLG1	kirre like nephrin family adhesion molecule 2	protein-coding
chr2	167219217	167219775	+	0	NA	intron (NM_008968, intron 5 of 9)	intron (NM_008968, intron 5 of 9)	21109	NM_008968	19223	Mm.2339	NM_008968	ENSMUSG00000017969	Ptgis	Cyp8|Cyp8a1|Pgis	prostaglandin I2 (prostacyclin) synthase	protein-coding
chr6	69985653	69986374	+	0	NA	Intergenic	RLTR40|LTR|ERVK	-658839	NR_004434	19783		NR_004434	ENSMUSG00000106222	Rprl1	Rmrp2|Rpr|Rprh2	ribonuclease P RNA-like 1	ncRNA
chr1	149832898	149833437	+	0	NA	intron (NM_001305632, intron 16 of 16)	intron (NM_001305632, intron 16 of 16)	89272	NM_001305632	18783	Mm.4186	NM_008869	ENSMUSG00000056220	Pla2g4a	Pla2g4|cPLA2|cPLA2-alpha|cPLA2alpha	phospholipase A2, group IVA (cytosolic, calcium-dependent)	protein-coding
chr4	14642108	14642712	+	0	NA	Intergenic	Intergenic	-20632	NM_145947	208890	Mm.483839	NM_145947	ENSMUSG00000040569	Slc26a7	-	solute carrier family 26, member 7	protein-coding
chr4	127593374	127594267	+	0	NA	Intergenic	Intergenic	-235656	NM_010291	14622	Mm.26859	NM_010291	ENSMUSG00000042357	Gjb5	Cnx31.1|Cx31.1|Gjb-5	gap junction protein, beta 5	protein-coding
chr4	127987723	127988447	+	0	NA	promoter-TSS (NM_001281955)	promoter-TSS (NM_001281955)	41	NM_001281955	329942	Mm.421342	NM_001281955	ENSMUSG00000028804	Csmd2	Gm139	CUB and Sushi multiple domains 2	protein-coding
chr11	46652531	46653217	+	0	NA	Intergenic	Intergenic	-7868	NR_028066	237749	Mm.339935	NR_028066	ENSMUSG00000086909	Gm4926	EG237749	T-cell immunoglobulin and mucin domain containing 2 pseudogene	pseudo
chr6	113740233	113740866	+	0	NA	intron (NM_024206, intron 1 of 8)	intron (NM_024206, intron 1 of 8)	132	NM_024206	110379	Mm.29296	NM_024206	ENSMUSG00000030298	Sec13	1110003H02Rik|Sec13l1|Sec13r	SEC13 homolog, nuclear pore and COPII coat complex component	protein-coding
chr11	96766384	96767363	+	0	NA	TTS (NM_028965)	TTS (NM_028965)	10682	NM_001163389	74479	Mm.270781	NM_028965	ENSMUSG00000020876	Snx11	4933439F10Rik|A930041K09Rik|AI117694	sorting nexin 11	protein-coding
chr10	73048864	73049175	+	0	NA	intron (NR_040646, intron 1 of 4)	intron (NR_040646, intron 1 of 4)	37686	NR_040646	327768	Mm.417745	NR_040646	ENSMUSG00000111994	A330049N07Rik	-	RIKEN cDNA A330049N07 gene	ncRNA
chr13	26761999	26763150	+	0	NA	Intergenic	Intergenic	7591	NM_008232	15192	Mm.7411	NM_008232	ENSMUSG00000045835	Hdgfl1	4921520N01Rik|HRP-1|Hdgfrp1|Pwwp1	HDGF like 1	protein-coding
chr9	80203991	80204380	+	0	NA	intron (NM_001039546, intron 1 of 32)	intron (NM_001039546, intron 1 of 32)	39151	NM_001039546	17920	Mm.4040	NM_008662	ENSMUSG00000033577	Myo6	BC029719|Myo6<rsv>|Tlc|rsv|sv	myosin VI	protein-coding
chr2	30628333	30628710	+	0	NA	Intergenic	Intergenic	33477	NM_030137	78617	Mm.40413	NM_030137	ENSMUSG00000047363	Cstad	9530039B02Rik	CSA-conditional, T cell activation-dependent protein	protein-coding
chr4	124265374	124266077	+	0	NA	Intergenic	Intergenic	220234	NR_040774	78460	Mm.452060	NR_040774		1700057H15Rik	-	RIKEN cDNA 1700057H15 gene	ncRNA
chr13	78094997	78096205	+	0	NA	intron (NM_001163419, intron 9 of 9)	intron (NM_001163419, intron 9 of 9)	70699	NM_029315	75507	Mm.443255	NM_029315	ENSMUSG00000093668	Pou5f2	1700013G10Rik|SPRM-1|Sprm1	POU domain class 5, transcription factor 2	protein-coding
chr1	149252948	149253490	+	0	NA	Intergenic	Intergenic	669220	NM_001305632	18783	Mm.4186	NM_008869	ENSMUSG00000056220	Pla2g4a	Pla2g4|cPLA2|cPLA2-alpha|cPLA2alpha	phospholipase A2, group IVA (cytosolic, calcium-dependent)	protein-coding
chr18	49748958	49749404	+	0	NA	intron (NM_026854, intron 1 of 5)	intron (NM_026854, intron 1 of 5)	6420	NM_026854	68857	Mm.96010	NM_026854	ENSMUSG00000024505	Dtwd2	1190002H09Rik|8030470C17Rik|AI414673|BB115449	DTW domain containing 2	protein-coding
chr7	29155319	29156406	+	0	NA	intron (NM_001146023, intron 2 of 7)	CpG-12933	348	NM_001146023	73833	Mm.260890	NM_028661	ENSMUSG00000030590	Fam98c	1110006G06Rik|AI836081|AV026483|B230110F21Rik	family with sequence similarity 98, member C	protein-coding
chr6	67434630	67435453	+	0	NA	intron (NM_144548, intron 7 of 10)	intron (NM_144548, intron 7 of 10)	56814	NM_144548	209590	Mm.221227	NM_144548	ENSMUSG00000049093	Il23r	IL-23R	interleukin 23 receptor	protein-coding
chr16	18128488	18129131	+	0	NA	intron (NM_022982, intron 1 of 1)	intron (NM_022982, intron 1 of 1)	1167	NM_022982	65079	Mm.40149	NM_022982	ENSMUSG00000043811	Rtn4r	NOGOR|NgR|NgR1	reticulon 4 receptor	protein-coding
chr17	3490193	3490615	+	0	NA	intron (NM_001286757, intron 1 of 12)	intron (NM_001286757, intron 1 of 12)	6914	NM_001286757	24001	Mm.137134	NM_011878	ENSMUSG00000023800	Tiam2	3000002F19Rik|STEF|mKIAA2016	T cell lymphoma invasion and metastasis 2	protein-coding
chr11	59895273	59895652	+	0	NA	Intergenic	Intergenic	-26037	NR_130986	69854	Mm.57859	NR_130986	ENSMUSG00000085551	1810063I02Rik	-	RIKEN cDNA 1810063I02 gene	ncRNA
chr9	121494150	121494785	+	0	NA	exon (NM_001284508, exon 2 of 4)	exon (NM_001284508, exon 2 of 4)	1227	NM_031161	12424	Mm.2619	NM_031161	ENSMUSG00000032532	Cck	-	cholecystokinin	protein-coding
chr11	75178405	75179234	+	0	NA	promoter-TSS (NM_027136)	promoter-TSS (NM_027136)	-11	NM_027136	246257	Mm.41496	NM_027136	ENSMUSG00000038268	Ovca2	9030414M07Rik	candidate tumor suppressor in ovarian cancer 2	protein-coding
chr18	27619346	27620024	+	0	NA	Intergenic	Intergenic	-940479	NR_045398	320624	Mm.50107	NR_045398	ENSMUSG00000117473	4930474G06Rik	-	RIKEN cDNA 4930474G06 gene	ncRNA
chr3	24670452	24671101	+	0	NA	intron (NM_001326288, intron 1 of 13)	intron (NM_001326288, intron 1 of 13)	113230	NM_001326288	635702	Mm.448351	NM_001326288	ENSMUSG00000102758	Naaladl2	2810043G22Rik|EG635702|Gm1021	N-acetylated alpha-linked acidic dipeptidase-like 2	protein-coding
chrX	135569424	135569929	+	0	NA	Intergenic	B3|SINE|B2	29101	NM_130888	170722	Mm.103373	NM_130888	ENSMUSG00000031410	Nxf7	Nx7|Nxf6|nfx-a1|nxf-a|nxf-a2	nuclear RNA export factor 7	protein-coding
chr19	7298840	7299589	+	0	NA	intron (NM_001080388, intron 1 of 16)	intron (NM_001080388, intron 1 of 16)	-3767	NM_001080390	13728	Mm.258986	NM_007928	ENSMUSG00000024969	Mark2	EMK-1|Emk|Par-1|Par-1b	MAP/microtubule affinity regulating kinase 2	protein-coding
chr16	64264989	64265793	+	0	NA	Intergenic	Intergenic	336940	NM_001368721	224291	Mm.246580	NM_173861	ENSMUSG00000068167	Csnka2ip	Ckt2	casein kinase 2, alpha prime interacting protein	protein-coding
chr11	120045784	120047159	+	0	NA	intron (NM_001198785, intron 1 of 13)	intron (NM_001198785, intron 1 of 13)	674	NM_001198785	11302	Mm.6826	NM_007377	ENSMUSG00000025375	Aatk	AATYK|aatyk1|mKIAA0641	apoptosis-associated tyrosine kinase	protein-coding
chr15	101315699	101316239	+	0	NA	Intergenic	Intergenic	22744	NM_001369218	77717	Mm.391998	NM_001369218	ENSMUSG00000075408	Smim41	6030408B16Rik|AI225877	small integral membrane protein 41	protein-coding
chr6	114343727	114344025	+	0	NA	Intergenic	Intergenic	-54060	NM_001317125	15465	Mm.333327	NM_008285	ENSMUSG00000053004	Hrh1	Bphs|H1R|HH1R|Hir	histamine receptor H1	protein-coding
chr11	61222107	61222452	+	0	NA	Intergenic	Intergenic	13537	NM_007436	11670	Mm.4257	NM_007436	ENSMUSG00000019102	Aldh3a1	Ahd-4|Ahd4|Aldh|Aldh3	aldehyde dehydrogenase family 3, subfamily A1	protein-coding
chr8	85026602	85027491	+	0	NA	exon (NM_026760, exon 1 of 3)	exon (NM_026760, exon 1 of 3)	213	NR_160793	68544	Mm.196005	NM_026760	ENSMUSG00000041203	Trir	1110002H14Rik|2310036O22Rik|AI854688	telomerase RNA component interacting RNase	protein-coding
chr10	79864613	79865524	+	0	NA	TTS (NM_008956)	TTS (NM_008956)	2481	NR_105875	102465549		NR_105875	ENSMUSG00000098562	Mir6910	Gm27763|mmu-mir-6910	microRNA 6910	ncRNA
chr12	33541600	33542154	+	0	NA	Intergenic	L1MC3|LINE|L1	112253	NM_172253	28071	Mm.196472	NM_172253	ENSMUSG00000020561	Twistnb	2410173G11|2810024J17Rik|D16Wsu83e	twist basic helix-loop-helix transcription factor 1 neighbor	protein-coding
chr16	20746534	20747177	+	0	NA	Intergenic	Intergenic	-12344	NM_009379	21832	Mm.3943	NM_009379	ENSMUSG00000022847	Thpo	Mgdf|Ml|Mpllg|Tpo	thrombopoietin	protein-coding
chr11	116661313	116662604	+	0	NA	intron (NM_001163318, intron 4 of 4)	intron (NM_001163318, intron 4 of 4)	4850	NM_001163318	100038570	Mm.390349	NM_001163318	ENSMUSG00000075410	Prcd	Gm11744	photoreceptor disc component	protein-coding
chr15	98708086	98708560	+	0	NA	5' UTR (NM_001364844, exon 1 of 3)	5' UTR (NM_001364844, exon 1 of 3)	129	NM_001364844	105833	Mm.26205	NM_153518	ENSMUSG00000003354	Ccdc65	4933417K04Rik|AI428139|AU020178|NYD-SP28	coiled-coil domain containing 65	protein-coding
chr13	106406429	106407356	+	0	NA	Intergenic	Intergenic	530066	NM_001360897	76582	Mm.132208	NM_029665	ENSMUSG00000042590	Ipo11	1700081H05Rik|2510001A17Rik|AI314624|AW555235|E330021B14Rik|Ranbp11	importin 11	protein-coding
chr11	102787612	102788054	+	0	NA	Intergenic	L1MB2|LINE|L1	17186	NM_008122	14615	Mm.390369	NM_008122	ENSMUSG00000034520	Gjc1	C130009G16Rik|Cnx45|Cx45|Gja-7|Gja7	gap junction protein, gamma 1	protein-coding
chr9	58558102	58558402	+	0	NA	Intergenic	Intergenic	-17312	NM_133983	102657	Mm.5356	NM_133983	ENSMUSG00000035914	Cd276	6030411F23Rik|AU016588|B7RP-2|B7h3	CD276 antigen	protein-coding
chr9	94577866	94578590	+	0	NA	Intergenic	Intergenic	-40147	NM_001033145	68861	Mm.258746	NM_001033145	ENSMUSG00000045414	Dipk2a	1190002N15Rik|GoPro49|HASF	divergent protein kinase domain 2A	protein-coding
chr5	122971581	122972400	+	0	NA	intron (NM_001003953, intron 4 of 22)	intron (NM_001003953, intron 4 of 22)	17109	NM_001003953	30841	Mm.86406	NM_013910	ENSMUSG00000029475	Kdm2b	Cxxc2|Fbl10|Fbxl10|Jhdm1b|PCCX2	lysine (K)-specific demethylase 2B	protein-coding
chr2	147454599	147455278	+	0	NA	Intergenic	Intergenic	89944	NM_008780	18503	Mm.315502	NM_008780	ENSMUSG00000037034	Pax1	Pax-1|hbs|hunchback|un|undulated|wt	paired box 1	protein-coding
chr4	126102231	126102669	+	0	NA	Intergenic	Intergenic	-1507	NM_001145827	74178	Mm.440269	NM_028800	ENSMUSG00000042608	Stk40	2310004N11Rik|AI428792	serine/threonine kinase 40	protein-coding
chr14	64261130	64261754	+	0	NA	intron (NM_001253715, intron 2 of 4)	RSINE1|SINE|B4	155514	NM_001253716	110265	Mm.26713	NM_026322	ENSMUSG00000054733	Msra	2310045J23Rik|6530413P12Rik|MSR-A	methionine sulfoxide reductase A	protein-coding
chr5	114248048	114248568	+	0	NA	exon (NM_133904, exon 49 of 52)	exon (NM_133904, exon 49 of 52)	25453	NM_148935	116810	Mm.17709	NM_148935	ENSMUSG00000042002	Foxn4	-	forkhead box N4	protein-coding
chr3	132000788	132001465	+	0	NA	Intergenic	Intergenic	-84166	NM_020265	56811	Mm.103593	NM_020265	ENSMUSG00000028031	Dkk2	-	dickkopf WNT signaling pathway inhibitor 2	protein-coding
chr3	44073408	44073828	+	0	NA	Intergenic	ORR1D2|LTR|ERVL-MaLR	1304642	NR_045172	72511	Mm.140700	NR_045172	ENSMUSG00000097040	2610316D01Rik	-	RIKEN cDNA 2610316D01 gene	ncRNA
chr12	111793933	111794527	+	0	NA	intron (NM_001361611, intron 14 of 14)	intron (NM_001361611, intron 14 of 14)	19649	NM_028875	74335	Mm.19082	NM_028875	ENSMUSG00000021287	Xrcc3	-	X-ray repair complementing defective repair in Chinese hamster cells 3	protein-coding
chr11	117056826	117057785	+	0	NA	Intergenic	Intergenic	-19478	NR_027059	76972	Mm.309167	NR_027059	ENSMUSG00000086859	Snhg20	2810008D09Rik	small nucleolar RNA host gene 20	ncRNA
chr11	97629369	97630114	+	0	NA	promoter-TSS (NM_175332)	promoter-TSS (NM_175332)	-25	NM_175332	103551	Mm.24506	NM_175332	ENSMUSG00000043439	Epop	AA409164|AI413509|AW539173|E13|E130012A19Rik|esPRC2p48	elongin BC and polycomb repressive complex 2 associated protein	protein-coding
chr17	30550324	30551295	+	0	NA	intron (NM_172618, intron 1 of 11)	intron (NM_172618, intron 1 of 11)	25478	NM_027060	224671	Mm.41220	NM_027060	ENSMUSG00000062202	Btbd9	1700023F20Rik|4930402L05|AI464421	BTB (POZ) domain containing 9	protein-coding
chr4	133754080	133754611	+	0	NA	promoter-TSS (NM_001080819)	promoter-TSS (NM_001080819)	-360	NM_001080819	93760	Mm.22478	NM_001080819	ENSMUSG00000007880	Arid1a	1110030E03Rik|BAF250a|Osa1|Smarcf1	AT rich interactive domain 1A (SWI-like)	protein-coding
chr1	97753036	97753883	+	0	NA	intron (NM_173760, intron 6 of 27)	L1M5|LINE|L1	16633	NM_173760	227399	Mm.220817	NM_173760	ENSMUSG00000040648	Ppip5k2	AW555814|Cfap160|D330021B20|Hisppd1|Vip2|mKIAA0433	diphosphoinositol pentakisphosphate kinase 2	protein-coding
chrX	63338926	63339480	+	0	NA	Intergenic	Lx7|LINE|L1	-812192	NR_045442	75545	Mm.391270	NR_045442	ENSMUSG00000085757	Tslrn1	1700019B21Rik	testis specific long noncoding RNA 1	ncRNA
chr4	119761020	119762654	+	0	NA	Intergenic	Intergenic	-52841	NM_010657	16656	Mm.302758	NM_010657	ENSMUSG00000028634	Hivep3	2900056N03Rik|A130075N07|AI848000|E030045D18Rik|KBP-1|KBP1|Krc|Rc|Schnurri-3|Shn3|Zas3	human immunodeficiency virus type I enhancer binding protein 3	protein-coding
chr17	30053512	30054398	+	0	NA	intron (NR_151442, intron 1 of 3)	intron (NR_151442, intron 1 of 3)	48916	NM_148926	21769	Mm.220972	NM_148926	ENSMUSG00000044477	Zfand3	AW539211|TEG-27|Tex27	zinc finger, AN1-type domain 3	protein-coding
chr17	26042805	26043609	+	0	NA	intron (NM_001162869, intron 1 of 14)	intron (NM_001162869, intron 1 of 14)	-21347	NM_153140	215445	Mm.41191	NM_153140	ENSMUSG00000037098	Rab11fip3	Cart1|D030060O14Rik|Rab11-FIP3|mKIAA0665	RAB11 family interacting protein 3 (class II)	protein-coding
chr2	163925060	163925601	+	0	NA	Intergenic	Intergenic	-6647	NM_183023	241770	Mm.330760	NM_183023	ENSMUSG00000035226	Rims4	6530406L02|Rim4	regulating synaptic membrane exocytosis 4	protein-coding
chr15	95534717	95535261	+	0	NA	Intergenic	Intergenic	-6231	NM_001356950	54003	Mm.3959	NM_016743	ENSMUSG00000022454	Nell2	A330108N19Rik|R75516|mel91	NEL-like 2	protein-coding
chrX	57325854	57326891	+	0	NA	5' UTR (NM_001358573, exon 1 of 21)	5' UTR (NM_001358573, exon 1 of 21)	229	NM_001358573	73341	Mm.261443	NM_152801	ENSMUSG00000031133	Arhgef6	1600028C08Rik|1700038J06Rik|4930592P22Rik|alpha-PIX	Rac/Cdc42 guanine nucleotide exchange factor (GEF) 6	protein-coding
chr1	134304865	134305512	+	0	NA	intron (NM_001144855, intron 23 of 28)	L2a|LINE|L2	15184	NM_031189	17928	Mm.16528	NM_031189	ENSMUSG00000026459	Myog	MYF4|bHLHc3|myo	myogenin	protein-coding
chr5	144014503	144015201	+	0	NA	promoter-TSS (NM_177682)	promoter-TSS (NM_177682)	1	NM_177682	231874	Mm.320432	NM_177682	ENSMUSG00000029617	Ccz1	AU022870	CCZ1 vacuolar protein trafficking and biogenesis associated	protein-coding
chr1	36707071	36707662	+	0	NA	intron (NM_146107, intron 2 of 10)	intron (NM_146107, intron 2 of 10)	2559	NM_146107	226977	Mm.28521	NM_146107	ENSMUSG00000037351	Actr1b	2310066K23Rik|AA960180|AI851923|Arp1b	ARP1 actin-related protein 1B, centractin beta	protein-coding
chr4	151648379	151648738	+	0	NA	intron (NM_001081557, intron 3 of 23)	L1MEc|LINE|L1	213210	NM_001081557	100072	Mm.318846	NM_001081557	ENSMUSG00000014592	Camta1	1810059M14Rik|2310058O09Rik|AI316882|AW987475|mKIAA0833	calmodulin binding transcription activator 1	protein-coding
chr1	104049120	104049816	+	0	NA	Intergenic	Intergenic	-719052	NM_011800	23836	Mm.103640	NM_011800	ENSMUSG00000050840	Cdh20	Cdh7	cadherin 20	protein-coding
chr11	103170686	103171434	+	0	NA	promoter-TSS (NM_019679)	promoter-TSS (NM_019679)	-78	NM_019679	57778	Mm.138913	NM_019679	ENSMUSG00000055805	Fmnl1	8030453N10Rik|AI553564|Fmnl|Fnrl|Frls	formin-like 1	protein-coding
chr10	81240813	81241135	+	0	NA	intron (NM_001034895, intron 4 of 17)	intron (NM_001034895, intron 4 of 17)	7811	NM_001034895	103406	Mm.158783	NM_001034895	ENSMUSG00000034949	Zfr2	2010013I23Rik|9130206N08Rik|AW045600|mKIAA1086	zinc finger RNA binding protein 2	protein-coding
chr5	129524867	129525096	+	0	NA	intron (NM_172276, intron 7 of 17)	intron (NM_172276, intron 7 of 17)	23750	NM_172276	231769	Mm.288714	NM_172276	ENSMUSG00000029439	Sfswap	1190005N23Rik|6330437E22Rik|AI197402|AW212079|SWAP|Sfrs8|Srsf8	splicing factor SWAP	protein-coding
chr2	180432090	180432695	+	0	NA	Intergenic	Intergenic	-23853	NR_149314	108115	Mm.133687	NM_148933	ENSMUSG00000038963	Slco4a1	OATP-E|Slc21a12	solute carrier organic anion transporter family, member 4a1	protein-coding
chr14	29575406	29575988	+	0	NA	intron (NM_009785, intron 2 of 37)	intron (NM_009785, intron 2 of 37)	146167	NM_009785	12294	Mm.386754	NM_009785	ENSMUSG00000021991	Cacna2d3	Cacnad3|alapha2delta3	calcium channel, voltage-dependent, alpha2/delta subunit 3	protein-coding
chr15	81023885	81024531	+	0	NA	intron (NM_153049, intron 3 of 12)	intron (NM_153049, intron 3 of 12)	46443	NM_134091	105835	Mm.274943	NM_134091	ENSMUSG00000042303	Sgsm3	1810012I01Rik|AI428557|BB175482|Cip85|R75178|RUSC3|Rutbc3	small G protein signaling modulator 3	protein-coding
chr14	17998115	17998842	+	0	NA	intron (NM_009380, intron 1 of 6)	MTA_Mm-int|LTR|ERVL-MaLR	16834	NM_009380	21834	Mm.32563	NM_009380	ENSMUSG00000021779	Thrb	Nr1a2|T3R[b]|T3Rbeta|Thrb1|Thrb2|c-erbAbeta	thyroid hormone receptor beta	protein-coding
chr4	3924319	3924655	+	0	NA	intron (NM_019969, intron 1 of 5)	intron (NM_019969, intron 1 of 5)	13918	NM_019969	56711	Mm.331467	NM_019969	ENSMUSG00000003282	Plag1	-	pleiomorphic adenoma gene 1	protein-coding
chr6	25032513	25033428	+	0	NA	Intergenic	Intergenic	-76845	NM_177013	319832	Mm.127446	NM_177013	ENSMUSG00000048022	Tmem229a	6332401O19Rik	transmembrane protein 229A	protein-coding
chr10	27041794	27042258	+	0	NA	intron (NM_008481, intron 46 of 63)	intron (NM_008481, intron 46 of 63)	269514	NM_176837	73910	Mm.356496	NM_176837	ENSMUSG00000039031	Arhgap18	4833419J07Rik|AI314906|AI843501	Rho GTPase activating protein 18	protein-coding
chr8	84823624	84824282	+	0	NA	intron (NR_033145, intron 1 of 1)	intron (NR_033145, intron 1 of 1)	-1130	NM_201227	23863	Mm.304252	NM_201227	ENSMUSG00000053226	Dand5	Cerl-2|Cerl2|Cerr2|Dte|GREM3|coco	DAN domain family member 5, BMP antagonist	protein-coding
chr5	13262841	13263712	+	0	NA	Intergenic	Intergenic	-133508	NM_001243072	20346	Mm.372039	NM_009152	ENSMUSG00000028883	Sema3a	Hsema-I|SEMA1|SemD|Semad|coll-1	sema domain, immunoglobulin domain (Ig), short basic domain, secreted, (semaphorin) 3A	protein-coding
chr11	77493699	77494282	+	0	NA	intron (NM_001004144, intron 1 of 19)	CpG	578	NM_001004144	216963	Mm.290182	NM_001004144	ENSMUSG00000011877	Git1	Cat-1|p95Cat	GIT ArfGAP 1	protein-coding
chr3	16277207	16277850	+	0	NA	Intergenic	RMER19C|LTR|ERVK	94363	NM_001358041	229096	Mm.23834	NM_172677	ENSMUSG00000047213	Ythdf3	9130022A11Rik	YTH N6-methyladenosine RNA binding protein 3	protein-coding
chr6	60714825	60715453	+	0	NA	Intergenic	Intergenic	113865	NM_001042451	20617	Mm.17484	NM_009221	ENSMUSG00000025889	Snca	NACP|alpha-Syn|alphaSYN	synuclein, alpha	protein-coding
chr8	123212434	123213377	+	0	NA	promoter-TSS (NM_145606)	promoter-TSS (NM_145606)	47	NM_177279	320869	Mm.258354	NM_177279	ENSMUSG00000048478	Spata33	4732415M23Rik|AI847264	spermatogenesis associated 33	protein-coding
chr11	3330505	3331058	+	0	NA	promoter-TSS (NM_178149)	promoter-TSS (NM_178149)	50	NM_178149	216505	Mm.390323	NM_178149	ENSMUSG00000034614	Pik3ip1	1500004A08Rik|5830455E04Rik|Crkd|Hgfl	phosphoinositide-3-kinase interacting protein 1	protein-coding
chr6	115601691	115602606	+	0	NA	intron (NM_023290, intron 1 of 7)	CpG	210	NM_023290	67027	Mm.101316	NM_023290	ENSMUSG00000000439	Mkrn2	2610002L04Rik|C81377	makorin, ring finger protein, 2	protein-coding
chr2	81440647	81441562	+	0	NA	Intergenic	Intergenic	-612554	NM_175513	241514	Mm.119383	NM_175513	ENSMUSG00000070866	Zfp804a	C630007C17Rik|Znf804a	zinc finger protein 804A	protein-coding
chr17	29175519	29176180	+	0	NA	intron (NM_001360239, intron 12 of 21)	intron (NM_001360239, intron 12 of 21)	61668	NM_001364848	442827	Mm.20023	NM_001002786	ENSMUSG00000064147	Rab44	9830134C10Rik	RAB44, member RAS oncogene family	protein-coding
chr5	120620611	120622099	+	0	NA	intron (NM_028041, intron 10 of 19)	intron (NM_028041, intron 10 of 19)	8225	NM_028041	71990	Mm.24495	NM_028041	ENSMUSG00000029599	Ddx54	2410015A15Rik|AI414901|DP97	DEAD (Asp-Glu-Ala-Asp) box polypeptide 54	protein-coding
chr16	50572389	50573065	+	0	NA	Intergenic	MamRep137|DNA|TcMar-Tigger	-17776	NR_040566	75211	Mm.399337	NR_040566	ENSMUSG00000116848	4930542D17Rik	-	RIKEN cDNA 4930542D17 gene	ncRNA
chr1	101995709	101996251	+	0	NA	Intergenic	Intergenic	840212	NR_037989	100504525	Mm.87065	NR_037989	ENSMUSG00000100684	Gm20268	-	predicted gene, 20268	ncRNA
chr11	4894855	4895818	+	0	NA	promoter-TSS (NM_172438)	promoter-TSS (NM_172438)	-7	NM_172438	107829	Mm.28969	NM_172438	ENSMUSG00000034274	Thoc5	1700060C24Rik|A430085L24Rik|Fmip|PK1.3|Sgk2	THO complex 5	protein-coding
chr1	145184947	145185391	+	0	NA	Intergenic	L1MA9|LINE|L1	-409742	NM_022881	64214	Mm.253927	NM_022881	ENSMUSG00000026357	Rgs18	-	regulator of G-protein signaling 18	protein-coding
chr15	101293779	101294555	+	0	NA	intron (NM_001369218, intron 1 of 1)	intron (NM_001369218, intron 1 of 1)	942	NM_001369218	77717	Mm.391998	NM_001369218	ENSMUSG00000075408	Smim41	6030408B16Rik|AI225877	small integral membrane protein 41	protein-coding
chr5	140955817	140956116	+	0	NA	intron (NM_175362, intron 1 of 24)	MTEa|LTR|ERVL-MaLR	44630	NM_175362	108723	Mm.46187	NM_175362	ENSMUSG00000036526	Card11	0610008L17Rik|2410011D02Rik|BIMP3|CARMA1	caspase recruitment domain family, member 11	protein-coding
chr14	107053030	107053584	+	0	NA	Intergenic	MLTR18B_MM|LTR|ERVK	-566787	NR_045938	73631	Mm.48862	NR_045938	ENSMUSG00000099794	1700128A07Rik	-	RIKEN cDNA 1700128A07 gene	ncRNA
chr4	136081759	136082209	+	0	NA	Intergenic	CpG	-28591	NM_025919	67025	Mm.276856	NM_025919	ENSMUSG00000059291	Rpl11	2010203J19Rik	ribosomal protein L11	protein-coding
chr5	143271568	143271974	+	0	NA	Intergenic	ZP3AR|Satellite|Satellite	-1749	NM_017467	54201	Mm.6666	NM_017467	ENSMUSG00000046658	Zfp316	Emzf1|Mzf3|Znf316	zinc finger protein 316	protein-coding
chr11	101057832	101058203	+	0	NA	intron (NM_001362637, intron 21 of 21)	intron (NM_001362637, intron 21 of 21)	-12077	NM_013792	27419	Mm.95452	NM_013792	ENSMUSG00000001751	Naglu	-	alpha-N-acetylglucosaminidase (Sanfilippo disease IIIB)	protein-coding
chr15	102381640	102381994	+	0	NA	Intergenic	Intergenic	-14849	NM_001348205	170574	Mm.263284	NM_130458	ENSMUSG00000060284	Sp7	6430578P22Rik|C22|Osx	Sp7 transcription factor 7	protein-coding
chr5	128360959	128361604	+	0	NA	intron (NM_172885, intron 1 of 8)	intron (NM_172885, intron 1 of 8)	71796	NM_172885	243274	Mm.447698	NM_172885	ENSMUSG00000034310	Tmem132d	C630028F04Rik	transmembrane protein 132D	protein-coding
chr8	96372603	96373421	+	0	NA	Intergenic	Intergenic	-484611	NM_010325	14719	Mm.230169	NM_010325	ENSMUSG00000031672	Got2	AL022787|FABP-pm|Got-2|Kyat4|mAspAT	glutamatic-oxaloacetic transaminase 2, mitochondrial	protein-coding
chr2	166105107	166105527	+	0	NA	intron (NM_001355619, intron 4 of 21)	intron (NM_001355619, intron 4 of 21)	49968	NM_001355619	72043	Mm.1011	NM_028072	ENSMUSG00000006800	Sulf2	2010004N24Rik|AU020235|MSulf-2|mKIAA1247	sulfatase 2	protein-coding
chr5	122165065	122165575	+	0	NA	intron (NR_156471, intron 1 of 6)	intron (NR_156471, intron 1 of 6)	6979	NM_001370947	434233	Mm.280784	NM_001370947		Ppp1ccb	EG434233|Gm5601|PP-1G|Ppp1cc	protein phosphatase 1 catalytic subunit gamma B	protein-coding
chr9	62220321	62221173	+	0	NA	Intergenic	Intergenic	23353	NR_040769	330958	Mm.411888	NR_040769	ENSMUSG00000111232	A730043L09Rik	A730043L09	RIKEN cDNA A730043L09 gene	ncRNA
chr13	84666551	84666957	+	0	NA	Intergenic	BGLII|LTR|ERVK	444458	NM_001361911	72745	Mm.295063	NM_175187	ENSMUSG00000035762	Tmem161b	2810446P07Rik|AI843389	transmembrane protein 161B	protein-coding
chr8	124490433	124490859	+	0	NA	Intergenic	Intergenic	-30121	NM_029746	76332	Mm.240108	NM_029746	ENSMUSG00000031979	Cog2	1190002B08Rik|2700012E02Rik|C86089|Ldlc	component of oligomeric golgi complex 2	protein-coding
chr5	129060816	129061849	+	0	NA	Intergenic	Intergenic	-35418	NM_001081342	243277	Mm.440501	NM_177734	ENSMUSG00000044017	Adgrd1	E230012M21Rik|Gpr133	adhesion G protein-coupled receptor D1	protein-coding
chr1	69759284	69760190	+	0	NA	Intergenic	Intergenic	-67233	NM_001271533	66722	Mm.440554	NM_025728	ENSMUSG00000053153	Spag16	4921511D23Rik|4930524F24Rik|4930585K05Rik|AV261009|Pf20|Wdr29	sperm associated antigen 16	protein-coding
chr1	92675857	92676472	+	0	NA	Intergenic	Intergenic	-27323	NM_153114	260301	Mm.219545	NM_153114	ENSMUSG00000044055	Otos	OTOSP	otospiralin	protein-coding
chr2	155788089	155788761	+	0	NA	intron (NM_010808, intron 1 of 8)	intron (NM_010808, intron 1 of 8)	13083	NM_010808	17391	Mm.389325	NM_010808	ENSMUSG00000027612	Mmp24	AU040325|MMP-21|MT5-MMP|MT5MMP|MTMMP5	matrix metallopeptidase 24	protein-coding
chr11	74829990	74830998	+	0	NA	promoter-TSS (NM_010813)	promoter-TSS (NM_010813)	-430	NM_010813	17428	Mm.3759	NM_010813	ENSMUSG00000000282	Mnt	Rox|bHLHd3	max binding protein	protein-coding
chr15	6088602	6089137	+	0	NA	Intergenic	(GAAA)n|Simple_repeat|Simple_repeat	-44165	NR_155429	105245876	Mm.128197	NR_155428		Gm41259	-	predicted gene, 41259	ncRNA
chr9	106664314	106665178	+	0	NA	intron (NM_001081654, intron 4 of 5)	intron (NM_001081654, intron 4 of 5)	-8637	NM_001160353	108068	Mm.410822	NM_001160353	ENSMUSG00000023192	Grm2	4930441L02Rik|Gprc1b|mGluR2|mGluR7	glutamate receptor, metabotropic 2	protein-coding
chr9	120012792	120013475	+	0	NA	TTS (NM_011724)	TTS (NM_011724)	10465	NM_011724	22437	Mm.10117	NM_011724	ENSMUSG00000079243	Xirp1	AI415219|Cmya1	xin actin-binding repeat containing 1	protein-coding
chr8	84482691	84483322	+	0	NA	intron (NM_001252059, intron 2 of 45)	intron (NM_001252059, intron 2 of 45)	67642	NM_001252061	12286	Mm.334658	NM_007578	ENSMUSG00000034656	Cacna1a	APCA|BI|Caca1a|Cacnl1a4|Cav2.1|Ccha1a|EA2|FHM|HPCA|MHP|MHP1|SCA6|alpha1A|la|nmf352|rkr|smrl|tg	calcium channel, voltage-dependent, P/Q type, alpha 1A subunit	protein-coding
chr4	137250633	137251482	+	0	NA	Intergenic	Intergenic	-26578	NM_009523	22417	Mm.20355	NM_009523	ENSMUSG00000036856	Wnt4	Wnt-4	wingless-type MMTV integration site family, member 4	protein-coding
chr2	181219620	181220227	+	0	NA	promoter-TSS (NM_199312)	promoter-TSS (NM_199312)	-93	NM_199312	332713	Mm.23349	NM_199312	ENSMUSG00000047841	Fndc11	1700026M20Rik	fibronectin type III domain containing 11	protein-coding
chr4	131911608	131911881	+	0	NA	TTS (NR_102394)	TTS (NR_102394)	8285	NR_102394	545681	Mm.2478	NR_102393	ENSMUSG00000085667	Gm12992	-	predicted gene 12992	ncRNA
chr12	53419983	53420595	+	0	NA	intron (NM_001370962, intron 2 of 11)	intron (NM_001370962, intron 2 of 11)	171857	NM_013780	27386	Mm.247044	NM_013780	ENSMUSG00000021010	Npas3	4930423H22Rik|bHLHe12	neuronal PAS domain protein 3	protein-coding
chr1	87507880	87508234	+	0	NA	intron (NM_019867, intron 2 of 12)	L2a|LINE|L2	2305	NM_019867	53972	Mm.435439	NM_019867	ENSMUSG00000026259	Ngef	Tims2|ephexin	neuronal guanine nucleotide exchange factor	protein-coding
chrX	154713785	154714445	+	0	NA	Intergenic	Intergenic	-134785	NM_001037167	434881	Mm.357614	NM_001037167	ENSMUSG00000072888	Samt2	EG434881|Gm5647	spermatogenesis associated multipass transmembrane protein 2	protein-coding
chr11	120098477	120099342	+	0	NA	promoter-TSS (NM_001110242)	promoter-TSS (NM_001110242)	-25	NM_001110242	208501	Mm.46699	NM_001110242	ENSMUSG00000078572	Ndufaf8	1810043H04Rik	NADH:ubiquinone oxidoreductase complex assembly factor 8	protein-coding
chr5	125188922	125189414	+	0	NA	Intergenic	MLT2B4|LTR|ERVL	-9954	NM_011424	20602	Mm.278646	NM_011424	ENSMUSG00000029478	Ncor2	N-CoR|SMRT|SMRTe	nuclear receptor co-repressor 2	protein-coding
chr17	47169339	47170338	+	0	NA	intron (NM_001097623, intron 3 of 19)	B4|SINE|B4	28896	NM_001097623	224829	Mm.260989	NM_172622		Trerf1	9430096I18Rik|AI429294|B830015H24|RAPA|Trep-132|Trep132	transcriptional regulating factor 1	protein-coding
chr17	30467596	30468243	+	0	NA	intron (NM_172618, intron 6 of 11)	intron (NM_172618, intron 6 of 11)	-71739	NR_030688	623169	Mm.440508	NR_030688		Gm6402	EG623169	ribosomal protein S17 pseudogene	pseudo
chr5	13365009	13365673	+	0	NA	Intergenic	Intergenic	-31443	NM_001243072	20346	Mm.372039	NM_009152	ENSMUSG00000028883	Sema3a	Hsema-I|SEMA1|SemD|Semad|coll-1	sema domain, immunoglobulin domain (Ig), short basic domain, secreted, (semaphorin) 3A	protein-coding
chr19	6950524	6952319	+	0	NA	exon (NM_001285453, exon 4 of 4)	exon (NM_001285453, exon 4 of 4)	8859	NM_001285453	12015	Mm.4387	NM_007522	ENSMUSG00000024959	Bad	AI325008|Bbc2	BCL2-associated agonist of cell death	protein-coding
chr14	44988540	44989779	+	0	NA	exon (NM_008964, exon 1 of 2)	exon (NM_008964, exon 1 of 2)	1048	NM_008964	19217	Mm.4630	NM_008964	ENSMUSG00000037759	Ptger2	EP2|Ptgerep2	prostaglandin E receptor 2 (subtype EP2)	protein-coding
chr15	87411830	87412492	+	0	NA	Intergenic	Intergenic	-132138	NM_001252310	106014	Mm.244319	NM_134096	ENSMUSG00000054863	Tafa5	Fam19a5|Tafa-5|Tara-5	TAFA chemokine like family member 5	protein-coding
chr18	10931316	10931906	+	0	NA	Intergenic	Intergenic	-120899	NM_010258	14465	Mm.329287	NM_010258	ENSMUSG00000005836	Gata6	AA410133|GATA-6	GATA binding protein 6	protein-coding
chr8	101956892	101957319	+	0	NA	Intergenic	Intergenic	828006	NM_009866	12552	Mm.1571	NM_009866	ENSMUSG00000031673	Cdh11	Cad11|OSF-4	cadherin 11	protein-coding
chr5	114090726	114091741	+	0	NA	5' UTR (NM_026805, exon 1 of 16)	5' UTR (NM_026805, exon 1 of 16)	147	NM_001359214	68666	Mm.63584	NM_026805	ENSMUSG00000042078	Svop	1110030H18Rik|AI415691|msvop	SV2 related protein	protein-coding
chr2	25240590	25241493	+	0	NA	Intergenic	Intergenic	-1144	NM_026415	67859	Mm.46431	NM_026415	ENSMUSG00000036731	Cysrt1	2310002J15Rik|AV023762	cysteine rich tail 1	protein-coding
chr9	121417299	121417704	+	0	NA	intron (NM_001357968, intron 1 of 14)	intron (NM_001357968, intron 1 of 14)	14055	NM_001357968	67095	Mm.491112	NM_175114	ENSMUSG00000032536	Trak1	2310001H13Rik|AI413908|AI467545|hyrt|mKIAA1042	trafficking protein, kinesin binding 1	protein-coding
chr13	75403072	75403670	+	0	NA	Intergenic	Intergenic	-241675	NR_030451	751556		NR_030451	ENSMUSG00000076236	Mir682	Mirn682|mir-682|mmu-mir-682	microRNA 682	ncRNA
chr13	8690014	8690907	+	0	NA	intron (NM_052977, intron 4 of 9)	intron (NM_052977, intron 4 of 9)	180584	NM_172445	207615	Mm.284654	NM_172445	ENSMUSG00000021147	Wdr37	-	WD repeat domain 37	protein-coding
chr13	67414829	67415396	+	0	NA	intron (NM_177811, intron 1 of 3)	intron (NM_177811, intron 1 of 3)	6306	NM_177811	328274	Mm.222470	NM_177811	ENSMUSG00000055560	Zfp459	9930025G17Rik|Rslcan-14	zinc finger protein 459	protein-coding
chr17	5613130	5613846	+	0	NA	intron (NM_146073, intron 1 of 8)	intron (NM_146073, intron 1 of 8)	120888	NM_146073	224454	Mm.487663	NM_146073	ENSMUSG00000034265	Zdhhc14	B530001K09Rik|New1cp	zinc finger, DHHC domain containing 14	protein-coding
chr14	32072993	32073761	+	0	NA	Intergenic	Intergenic	11909	NR_104305	105638	Mm.2519	NM_172254	ENSMUSG00000021905	Dph3	DELGIP1|DelgipP1|Desr1|KTI11|Zcsl2	diphthamine biosynthesis 3	protein-coding
chr4	26275820	26277783	+	0	NA	Intergenic	Intergenic	69851	NM_172865	242362	Mm.245602	NM_172865	ENSMUSG00000040520	Manea	4932703L02Rik	mannosidase, endo-alpha	protein-coding
chr4	133614053	133615104	+	0	NA	intron (NM_001017968, intron 3 of 7)	intron (NM_001017968, intron 3 of 7)	-12410	NM_018754	55948	Mm.44482	NM_018754	ENSMUSG00000047281	Sfn	Er|Mme1|Ywhas	stratifin	protein-coding
chr5	134614781	134615171	+	0	NA	promoter-TSS (NM_020044)	promoter-TSS (NM_020044)	49	NM_022964	56743	Mm.391375	NM_020044	ENSMUSG00000040751	Lat2	AW125574|LAB|NTAL|WSCR5|Wbscr15|Wbscr5	linker for activation of T cells family, member 2	protein-coding
chr2	106208952	106209388	+	0	NA	Intergenic	Intergenic	-205621	NM_026992	99349	Mm.25661	NM_026992	ENSMUSG00000027166	Dnajc24	1700030A21Rik|2610027M02Rik|AV066965|AW240712|Dph4|MmDjC7|Zcsl3	DnaJ heat shock protein family (Hsp40) member C24	protein-coding
chr17	31814779	31815277	+	0	NA	Intergenic	Intergenic	40776	NM_010831	17691	Mm.290941	NM_010831	ENSMUSG00000024042	Sik1	Hrt-20|Msk|Sik|Sik-1|Snf1lk	salt inducible kinase 1	protein-coding
chr7	25047173	25047981	+	0	NA	intron (NM_001360067, intron 11 of 19)	MER102b|DNA|hAT-Charlie	24792	NM_001360067	14809	Mm.2879	NM_008168	ENSMUSG00000003378	Grik5	GluK5|GluRgamma2|KA2	glutamate receptor, ionotropic, kainate 5 (gamma 2)	protein-coding
chr7	46082322	46083453	+	0	NA	intron (NM_153057, intron 29 of 30)	ID_B1|SINE|B4	17350	NM_010602	16514	Mm.333863	NM_010602	ENSMUSG00000096146	Kcnj11	Kir6.2|mBIR	potassium inwardly rectifying channel, subfamily J, member 11	protein-coding
chr13	46363306	46364514	+	0	NA	Intergenic	Intergenic	-54390	NM_001081425	666794	Mm.38269	NM_001081425	ENSMUSG00000038132	Rbm24	6330546B05Rik|AI606861	RNA binding motif protein 24	protein-coding
chr4	68452694	68453106	+	0	NA	Intergenic	Intergenic	-130939	NR_151548	102633975		NR_151548		Gm12911	-	predicted gene 12911	ncRNA
chr2	92058379	92059062	+	0	NA	Intergenic	CpG	-34550	NM_011957	26427	Mm.10353	NM_011957	ENSMUSG00000027230	Creb3l1	Oasis	cAMP responsive element binding protein 3-like 1	protein-coding
chr16	83273945	83274715	+	0	NA	Intergenic	Lx9|LINE|L1	-1096813	NR_040567	75247	Mm.417813	NR_040567	ENSMUSG00000116907	4930553E22Rik	-	RIKEN cDNA 4930553E22 gene	ncRNA
chr15	77771613	77771958	+	0	NA	intron (NM_022410, intron 26 of 40)	intron (NM_022410, intron 26 of 40)	-14775	NM_001357895	239552	Mm.125650	NM_001081970	ENSMUSG00000056656	Apol8	9830006J20Rik|APOL-II|Apol2	apolipoprotein L 8	protein-coding
chr6	64649484	64650410	+	0	NA	intron (NM_001370966, intron 14 of 15)	intron (NM_001370966, intron 14 of 15)	-79178	NM_007500	11921	Mm.57229	NM_007500	ENSMUSG00000073043	Atoh1	Hath1|MATH-1|Math1|bHLHa14	atonal bHLH transcription factor 1	protein-coding
chr14	27623429	27623906	+	0	NA	intron (NM_177814, intron 1 of 15)	intron (NM_177814, intron 1 of 15)	1260	NM_177814	238988	Mm.318004	NM_177814	ENSMUSG00000040640	Erc2	6430531D06|CAST|CAST1/ERC2|D14Ertd171e|ELKS2alpha	ELKS/RAB6-interacting/CAST family member 2	protein-coding
chr5	122063314	122063953	+	0	NA	Intergenic	Intergenic	-13782	NM_001312908	13048	Mm.156172	NM_007804	ENSMUSG00000042589	Cux2	1700051K22Rik|Cutl2|Cux-2	cut-like homeobox 2	protein-coding
chr11	101052733	101053148	+	0	NA	intron (NM_001362637, intron 19 of 21)	PB1D10|SINE|Alu	-17154	NM_013792	27419	Mm.95452	NM_013792	ENSMUSG00000001751	Naglu	-	alpha-N-acetylglucosaminidase (Sanfilippo disease IIIB)	protein-coding
chr11	97798717	97800644	+	0	NA	5' UTR (NM_010688, exon 1 of 7)	5' UTR (NM_010688, exon 1 of 7)	115	NM_010688	16796	Mm.271967	NM_010688	ENSMUSG00000038366	Lasp1	AA408629|Def-4|LASP-1|MLN 50|SH3P6|Tg(Col1a1-lacZ)1Ngma	LIM and SH3 protein 1	protein-coding
chr10	14639091	14639776	+	0	NA	Intergenic	Intergenic	66056	NM_025418	66201	Mm.227983	NM_025418	ENSMUSG00000019868	Vta1	1110001D18Rik|1110059P08Rik|AU040813|C85340|LIP5|SBP1	vesicle (multivesicular body) trafficking 1	protein-coding
chr4	41811659	41811906	+	0	NA	Intergenic	Intergenic	-37606	NR_154591	20301	Mm.335946	NM_011336	ENSMUSG00000073888	Ccl27a	ALP|AW558992|CTACK|CTAK|Ccl27|ESkine|ILC|PESKY|Scya27|Scya27a	chemokine (C-C motif) ligand 27A	protein-coding
chr8	59302907	59303512	+	0	NA	Intergenic	Intergenic	391454	NM_173411	234290	Mm.39244	NM_173411	ENSMUSG00000049946	BC030500	-	cDNA sequence BC030500	protein-coding
chr11	118804413	118804833	+	0	NA	intron (NM_001039168, intron 2 of 14)	intron (NM_001039168, intron 2 of 14)	-43582	NM_001285438	52897	Mm.341103	NM_001024931	ENSMUSG00000025576	Rbfox3	Fox-3|Hrnbp3|NeuN|Neuna60	RNA binding protein, fox-1 homolog (C. elegans) 3	protein-coding
chr18	50616978	50617507	+	0	NA	Intergenic	Lx4B|LINE|L1	-48543	NM_026108	67365	Mm.158150	NM_026108	ENSMUSG00000048875	Pudp	1700121L12Rik|GS1|Hdhd1|Hdhd1a	pseudouridine 5-phosphatase	protein-coding
chr12	8817730	8818152	+	0	NA	Intergenic	Intergenic	46545	NM_011519	20969	Mm.2580	NM_011519	ENSMUSG00000020592	Sdc1	AA408134|AA409076|CD138|Sstn|Synd|Synd1|syn-1	syndecan 1	protein-coding
chr11	9909464	9909871	+	0	NA	Intergenic	Intergenic	717725	NM_178259	268379	Mm.39270	NM_178259	ENSMUSG00000004668	Abca13	9830132L24|A930002G16Rik|AI956815	ATP-binding cassette, sub-family A (ABC1), member 13	protein-coding
chr6	13301370	13301803	+	0	NA	Intergenic	Intergenic	-76621	NM_001013757	232585	Mm.389082	NM_001013757	ENSMUSG00000079679	Vwde	Gm467	von Willebrand factor D and EGF domains	protein-coding
chr2	165286480	165286989	+	0	NA	intron (NM_001252575, intron 1 of 9)	intron (NM_001252575, intron 1 of 9)	1053	NM_001252574	228875	Mm.21184	NM_144893	ENSMUSG00000017664	Slc35c2	C85957|CGI-15|D2Wsu58e|Ovcov1	solute carrier family 35, member C2	protein-coding
chr5	69292122	69292832	+	0	NA	intron (NM_175519, intron 1 of 1)	intron (NM_175519, intron 1 of 1)	49232	NM_175519	243043	Mm.234821	NM_175519	ENSMUSG00000037653	Kctd8	A730087N02Rik	potassium channel tetramerisation domain containing 8	protein-coding
chr2	92442376	92442963	+	0	NA	Intergenic	Intergenic	-8600	NM_009963	12953	Mm.254181	NM_009963	ENSMUSG00000068742	Cry2	AV006279|D130054K12Rik	cryptochrome 2 (photolyase-like)	protein-coding
chr11	69695095	69695670	+	0	NA	intron (NM_001034097, intron 2 of 12)	intron (NM_001034097, intron 2 of 12)	716	NM_001159503	619441	Mm.8983	NM_001034097	ENSMUSG00000018752	Tnfsfm13	Tnfsf12-Tnfsf13|Tnfsf12Tnfsf13|Tnfsf12tnfsf13|Twe-pril	tumor necrosis factor (ligand) superfamily, membrane-bound member 13	protein-coding
chr13	75891388	75892736	+	0	NA	intron (NM_028493, intron 8 of 11)	intron (NM_028493, intron 8 of 11)	51762	NM_028493	73296	Mm.276200	NM_028493	ENSMUSG00000021589	Rhobtb3	1700040C17Rik|2610033K01Rik|4930503C18Rik|AI317148|AW208826|mKIAA0878	Rho-related BTB domain containing 3	protein-coding
chr17	25567647	25569369	+	0	NA	intron (NM_011447, intron 2 of 2)	intron (NM_011447, intron 2 of 2)	2178	NM_011447	20681	Mm.258220	NM_011447	ENSMUSG00000024176	Sox8	-	SRY (sex determining region Y)-box 8	protein-coding
chr18	55488842	55489301	+	0	NA	Intergenic	Intergenic	-496480	NM_001360787	269023	Mm.192984	NM_175751	ENSMUSG00000052713	Zfp608	4932417D18Rik|D430007A19Rik|Znf608	zinc finger protein 608	protein-coding
chr6	8832944	8833523	+	0	NA	Intergenic	Intergenic	-54749	NM_010492	15893	Mm.275683	NM_010492	ENSMUSG00000062995	Ica1	69kDa|ICA69	islet cell autoantigen 1	protein-coding
chr12	51275573	51276734	+	0	NA	Intergenic	Intergenic	-72077	NM_001015099	217558	Mm.253264	NM_001015099	ENSMUSG00000035293	G2e3	6030408C04Rik|9030416F18|AW046379|D930034K21Rik|mKIAA1333	G2/M-phase specific E3 ubiquitin ligase	protein-coding
chr7	122415902	122416326	+	0	NA	intron (NM_001316672, intron 2 of 16)	intron (NM_001316672, intron 2 of 16)	126989	NM_001316672	18751	Mm.207496	NM_008855	ENSMUSG00000052889	Prkcb	PKC-B|PKC-Beta|Pkcb|Prkcb1|Prkcb2	protein kinase C, beta	protein-coding
chr15	77366717	77367395	+	0	NA	Intergenic	Intergenic	32054	NM_029419	75761	Mm.232636	NM_029419	ENSMUSG00000010601	Apol7a	9130022K13Rik|Apol3	apolipoprotein L 7a	protein-coding
chr19	41911394	41912588	+	0	NA	5' UTR (NM_023418, exon 1 of 4)	5' UTR (NM_023418, exon 1 of 4)	120	NM_023418	18648	Mm.16783	NM_023418	ENSMUSG00000011752	Pgam1	2310050F24Rik|Pgam-1	phosphoglycerate mutase 1	protein-coding
chr12	56587576	56588289	+	0	NA	Intergenic	Intergenic	-3127	NR_046002	97836	Mm.410567	NR_046002	ENSMUSG00000092515	C87198	-	expressed sequence C87198	ncRNA
chr14	106500364	106501314	+	0	NA	Intergenic	Intergenic	-14319	NR_045938	73631	Mm.48862	NR_045938	ENSMUSG00000099794	1700128A07Rik	-	RIKEN cDNA 1700128A07 gene	ncRNA
chr5	110526531	110526813	+	0	NA	TTS (NR_102290)	TTS (NR_102290)	11749	NR_102290	231603	Mm.22836	NM_173766	ENSMUSG00000048215	A630023P12Rik	-	RIKEN cDNA A630023P12 gene	ncRNA
chr11	96909908	96910335	+	0	NA	intron (NM_001363255, intron 10 of 13)	intron (NM_001363255, intron 10 of 13)	6280	NM_001363256	80280	Mm.28297	NM_030248	ENSMUSG00000018669	Cdk5rap3	1810007E24Rik|BC002318|C53|C81486|HSF-27|IC53|LZAP|MST016	CDK5 regulatory subunit associated protein 3	protein-coding
chr9	111289841	111290320	+	0	NA	Intergenic	Intergenic	18235	NM_175266	77781	Mm.209005	NM_175266	ENSMUSG00000046785	Epm2aip1	A930003G21Rik|mKIAA0766	EPM2A (laforin) interacting protein 1	protein-coding
chr7	132788523	132789295	+	0	NA	intron (NM_212473, intron 1 of 4)	intron (NM_212473, intron 1 of 4)	-1974	NM_175268	77938	Mm.225649	NM_175268	ENSMUSG00000030956	Fam53b	A930008G19Rik|mKIAA0140	family with sequence similarity 53, member B	protein-coding
chr11	96875591	96876066	+	0	NA	Intergenic	Intergenic	25435	NR_029562	387170		NR_029562	ENSMUSG00000065515	Mir152	Mirn152|mir-152|mmu-mir-152	microRNA 152	ncRNA
chr6	66936158	66937022	+	0	NA	intron (NM_001177557, intron 2 of 3)	intron (NM_001177557, intron 2 of 3)	39699	NM_001177558	14701	Mm.234342	NM_025278	ENSMUSG00000036402	Gng12	2010305F15Rik|AA536815|AI115529|AI314170|AI842738	guanine nucleotide binding protein (G protein), gamma 12	protein-coding
chr5	62043232	62044149	+	0	NA	Intergenic	Intergenic	234847	NM_019468	14380	Mm.347430	NM_019468	ENSMUSG00000089992	G6pd2	G6pdx-ps1|Gpd-2|Gpd2	glucose-6-phosphate dehydrogenase 2	protein-coding
chr16	7129189	7129869	+	0	NA	intron (NM_183188, intron 1 of 12)	intron (NM_183188, intron 1 of 12)	59694	NM_183188	268859	Mm.370334	NM_021477	ENSMUSG00000008658	Rbfox1	A2bp|A2bp1|Hrnbp1|fox-1	RNA binding protein, fox-1 homolog (C. elegans) 1	protein-coding
chr4	152427957	152429228	+	0	NA	intron (NM_001252654, intron 2 of 14)	intron (NM_001252654, intron 2 of 14)	20263	NM_001252655	16498	Mm.388924	NM_010598	ENSMUSG00000028931	Kcnab2	F5|I2rf5|Kcnb3|kv-beta-2	potassium voltage-gated channel, shaker-related subfamily, beta member 2	protein-coding
chrX	59589116	59589676	+	0	NA	Intergenic	Intergenic	-3824	NM_001290414	14168	Mm.7995	NM_010200	ENSMUSG00000031137	Fgf13	Fhf2	fibroblast growth factor 13	protein-coding
chr5	87276718	87277275	+	0	NA	Intergenic	MMERVK9C_I-int|LTR|ERVK	-22208	NM_053215	112417	Mm.160362	NM_053215	ENSMUSG00000057425	Ugt2b37	0610033E06Rik	UDP glucuronosyltransferase 2 family, polypeptide B37	protein-coding
chr1	192555245	192556035	+	0	NA	intron (NM_144881, intron 10 of 11)	intron (NM_144881, intron 10 of 11)	215579	NM_144881	226861	Mm.145857	NM_144881	ENSMUSG00000037375	Hhat	2810432O22Rik|AI462858|AP-2CRE|Skn|Tg(TFAP2A-cre)1Will	hedgehog acyltransferase	protein-coding
chr3	49867735	49868142	+	0	NA	Intergenic	Intergenic	-110622	NM_130448	73173	Mm.87246	NM_130448	ENSMUSG00000037892	Pcdh18	3110038E07Rik|BB095589|PCDH68L	protocadherin 18	protein-coding
chr4	138677675	138678493	+	0	NA	Intergenic	Intergenic	46772	NM_001285930	212190	Mm.292226	NM_178671	ENSMUSG00000043621	Ubxn10	5730509E04Rik|A830047D02|Ubxd3	UBX domain protein 10	protein-coding
chr2	28239153	28239926	+	0	NA	Intergenic	B1F|SINE|Alu	33850	NM_019498	56177	Mm.43278	NM_019498	ENSMUSG00000026833	Olfm1	AMY|AW742568|Noe1|OlfA|Pancortin|Pancortin3	olfactomedin 1	protein-coding
chr9	113040713	113041570	+	0	NA	Intergenic	Intergenic	546011	NR_040760	102688	Mm.394901	NR_040760	ENSMUSG00000109890	AU023762	-	expressed sequence AU023762	ncRNA
chr10	46192600	46192990	+	0	NA	Intergenic	Intergenic	-51953	NR_028274	100302593		NR_028274	ENSMUSG00000095118	Snord14d	Gm23710	small nucleolar RNA, C/D box 14D	snoRNA
chr9	121371353	121372358	+	0	NA	intron (NM_001357973, intron 1 of 5)	intron (NM_001357973, intron 1 of 5)	4897	NM_001357973	67095	Mm.491112	NM_175114	ENSMUSG00000032536	Trak1	2310001H13Rik|AI413908|AI467545|hyrt|mKIAA1042	trafficking protein, kinesin binding 1	protein-coding
chr1	11588010	11588995	+	0	NA	exon (NM_001160371, exon 6 of 8)	exon (NM_001160371, exon 6 of 8)	174397	NM_001310451	320492	Mm.52021	NM_177173	ENSMUSG00000057715	A830018L16Rik	-	RIKEN cDNA A830018L16 gene	protein-coding
chr8	27300942	27301558	+	0	NA	Intergenic	Intergenic	5205	NR_003107	732482	Mm.463248	NR_003107		Gm9731	-	Fam58a pseudogene	pseudo
chr6	64616595	64617341	+	0	NA	intron (NM_001370966, intron 14 of 15)	intron (NM_001370966, intron 14 of 15)	-112157	NM_007500	11921	Mm.57229	NM_007500	ENSMUSG00000073043	Atoh1	Hath1|MATH-1|Math1|bHLHa14	atonal bHLH transcription factor 1	protein-coding
chr1	192448359	192448984	+	0	NA	intron (NM_001038607, intron 10 of 10)	intron (NM_001038607, intron 10 of 10)	257894	NM_010600	16510	Mm.4489	NM_010600	ENSMUSG00000058248	Kcnh1	EAG1|Kv10.1|M-eag	potassium voltage-gated channel, subfamily H (eag-related), member 1	protein-coding
chr5	139931839	139933126	+	0	NA	intron (NM_175522, intron 1 of 1)	intron (NM_175522, intron 1 of 1)	24539	NM_175522	243312	Mm.237102	NM_175522	ENSMUSG00000048988	Elfn1	A930017N06Rik|AI197272|Ppp1r28	leucine rich repeat and fibronectin type III, extracellular 1	protein-coding
chr5	131429727	131430638	+	0	NA	Intergenic	Intergenic	-15464	NR_152164	545809	Mm.357553	NR_152164	ENSMUSG00000105387	Gm29681	Gm42590	predicted gene, 29681	ncRNA
chr9	108801914	108802506	+	0	NA	intron (NM_029634, intron 4 of 5)	intron (NM_029634, intron 4 of 5)	-6170	NM_030729	80987	Mm.192416	NM_030729	ENSMUSG00000032598	Nckipsd	AF3P21|DIP1|ORF1|SPIN90|WASLBP|WISH|Wasbp	NCK interacting protein with SH3 domain	protein-coding
chr4	134000490	134001435	+	0	NA	promoter-TSS (NM_001362960)	promoter-TSS (NM_001362960)	-80	NM_001362961	67422	Mm.100290	NM_026144	ENSMUSG00000012117	Dhdds	3222401G21Rik|CIT|DS|HDS|W91638|cis-IPTase	dehydrodolichyl diphosphate synthase	protein-coding
chr7	139703410	139703881	+	0	NA	Intergenic	Intergenic	-19830	NM_001302546	212124	Mm.425507	NM_177212	ENSMUSG00000049571	Cfap46	9330101J02Rik|E030019B06Rik|Gm170|Ttc40	cilia and flagella associated protein 46	protein-coding
chr11	7583234	7583880	+	0	NA	Intergenic	Intergenic	-369634	NM_008343	16009	Mm.29254	NM_008343	ENSMUSG00000020427	Igfbp3	AI649005|IGFBP-3|IGgfbp3	insulin-like growth factor binding protein 3	protein-coding
chr4	52278190	52278842	+	0	NA	Intergenic	Lx2|LINE|L1	160448	NR_045175	72648	Mm.391869	NR_045175	ENSMUSG00000085763	Smc2os	2700081L22Rik	structural maintenance of chromosomes 2, opposite strand	ncRNA
chr14	89084479	89085019	+	0	NA	Intergenic	Intergenic	-613353	NM_178685	219257	Mm.128861	NM_178685	ENSMUSG00000050505	Pcdh20	C630015B17Rik|Pcdh13	protocadherin 20	protein-coding
chr9	21196288	21198541	+	0	NA	intron (NM_019798, intron 1 of 9)	intron (NM_019798, intron 1 of 9)	709	NM_019798	18577	Mm.191749	NM_019798	ENSMUSG00000032177	Pde4a	D9Ertd60e|Dpde2	phosphodiesterase 4A, cAMP specific	protein-coding
chr1	80180993	80181486	+	0	NA	Intergenic	Intergenic	32705	NM_173425	241128	Mm.145511	NM_173425	ENSMUSG00000043230	Fam124b	A830043J08Rik	family with sequence similarity 124, member B	protein-coding
chr5	140661779	140662996	+	0	NA	Intergenic	Intergenic	-13356	NM_175274	78339	Mm.28947	NM_175274	ENSMUSG00000036565	Ttyh3	2900029G13Rik|AI414930|TTY3|mTTY3	tweety family member 3	protein-coding
chr5	122324577	122325548	+	0	NA	TTS (NM_144912)	TTS (NM_144912)	29133	NM_144912	231724	Mm.255587	NM_144912	ENSMUSG00000038569	Rad9b	A630082N15Rik|BC021784	RAD9 checkpoint clamp component B	protein-coding
chr15	100967969	100968328	+	0	NA	intron (NM_011323, intron 5 of 25)	intron (NM_011323, intron 5 of 25)	31877	NM_011323	20273	Mm.385012	NM_011323	ENSMUSG00000023033	Scn8a	AI853486|C630029C19Rik|NaCh6|Nav1.6|dmu|med|mnd-2|mnd2|nmf2|nmf335|nmf58|nur14|seal	sodium channel, voltage-gated, type VIII, alpha	protein-coding
chr5	136017324	136017576	+	0	NA	intron (NM_023742, intron 4 of 10)	B1F|SINE|Alu	-21046	NM_175309	100647	Mm.3089	NM_175309	ENSMUSG00000042985	Upk3b	AI447729|AI957187|P35|PMS2L14|UpIIIb	uroplakin 3B	protein-coding
chr1	96941303	96942188	+	0	NA	intron (NR_120500, intron 9 of 14)	intron (NR_120500, intron 9 of 14)	55815	NR_120500	67854	Mm.263706	NM_026413	ENSMUSG00000045463	Slco6b1	1700022M03Rik	solute carrier organic anion transporter family, member 6b1	ncRNA
chr2	80931702	80932277	+	0	NA	Intergenic	Intergenic	292725	NM_001190179	69482	Mm.29200	NM_027091	ENSMUSG00000026999	Nup35	2310006I24Rik|35kDa|5330402E05Rik|MP44|NO44	nucleoporin 35	protein-coding
chr10	24789679	24790467	+	0	NA	intron (NM_134005, intron 17 of 24)	intron (NM_134005, intron 17 of 24)	46122	NM_134005	209558	Mm.338425	NM_134005	ENSMUSG00000019989	Enpp3	AI876438|CD203c	ectonucleotide pyrophosphatase/phosphodiesterase 3	protein-coding
chr2	7101774	7102350	+	0	NA	intron (NM_001110231, intron 3 of 15)	intron (NM_001110231, intron 3 of 15)	-20760	NM_001110230	14007	Mm.398543	NM_010160	ENSMUSG00000002107	Celf2	B230218O03|B230345P09Rik|C88023|CELF-2|CUG-BP2|Cugbp2|D230046B21Rik|Etr-3|Napor|Napor-2|mETR-3	CUGBP, Elav-like family member 2	protein-coding
chrX	59085896	59086441	+	0	NA	intron (NM_001356335, intron 3 of 4)	intron (NM_001356335, intron 3 of 4)	11568	NR_030574	100124476		NR_030574	ENSMUSG00000070110	Mir504	Mirn504|mir-504|mmu-mir-504	microRNA 504	ncRNA
chr3	78707573	78708084	+	0	NA	Intergenic	MLTR14|LTR|ERV1	437918	NM_001310536	76089	Mm.31220	NM_001099624	ENSMUSG00000062232	Rapgef2	5830453M24Rik|CNRasGEF|Pdzgef1|RA-GEF-1|mKIAA0313|nRapGEP	Rap guanine nucleotide exchange factor (GEF) 2	protein-coding
chr11	120139198	120139615	+	0	NA	intron (NM_001361696, intron 4 of 16)	intron (NM_001361696, intron 4 of 16)	11945	NM_001361699	72055	Mm.253403	NM_024249	ENSMUSG00000061306	Slc38a10	1810073N04Rik	solute carrier family 38, member 10	protein-coding
chr2	30796342	30797155	+	0	NA	intron (NM_198000, intron 4 of 6)	intron (NM_198000, intron 4 of 6)	4989	NM_198000	73598	Mm.34166	NM_198000	ENSMUSG00000044320	1700001O22Rik	1700113K14Rik|4930549G18Rik	RIKEN cDNA 1700001O22 gene	protein-coding
chr7	45332864	45333973	+	0	NA	exon (NM_175130, exon 2 of 25)	exon (NM_175130, exon 2 of 25)	362	NM_175130	68667	Mm.439890	NM_175130	ENSMUSG00000038260	Trpm4	1110030C19Rik|AW047689|LTRPC4|LTrpC-4|TRPM4B	transient receptor potential cation channel, subfamily M, member 4	protein-coding
chr11	120017008	120017430	+	0	NA	intron (NM_007377, intron 3 of 13)	intron (NM_007377, intron 3 of 13)	-2357	NR_029767	723844		NR_029767	ENSMUSG00000065600	Mir338	Mirn338|mir-338|mmu-mir-338	microRNA 338	ncRNA
chr8	80189850	80190913	+	0	NA	Intergenic	Intergenic	-132373	NM_020259	15245	Mm.254493	NM_020259	ENSMUSG00000064325	Hhip	Hhip1	Hedgehog-interacting protein	protein-coding
chr15	80487187	80487690	+	0	NA	intron (NM_001163189, intron 4 of 5)	L2|LINE|L2	-48835	NR_155274	102633578	Mm.397484	NR_155274	ENSMUSG00000115888	Gm31369	-	predicted gene, 31369	ncRNA
chr6	114854456	114854995	+	0	NA	intron (NM_001253717, intron 19 of 19)	intron (NM_001253717, intron 19 of 19)	67096	NM_177683	232334	Mm.268357	NM_177683	ENSMUSG00000030315	Vgll4	BC048841|VGL-4	vestigial like family member 4	protein-coding
chr14	96165715	96166260	+	0	NA	intron (NM_053105, intron 7 of 10)	L1_Mur3|LINE|L1	284721	NM_025733	66732	Mm.75060	NM_025733	ENSMUSG00000034689	Spertl	4921530L21Rik	spermatid associated like	protein-coding
chr10	106958846	106959597	+	0	NA	intron (NM_001142804, intron 11 of 15)	intron (NM_001142804, intron 11 of 15)	164416	NM_001142804	380660	Mm.336072	NM_198636	ENSMUSG00000035948	Acss3	8430416H19Rik|Gm874	acyl-CoA synthetase short-chain family member 3	protein-coding
chr11	13998881	13999524	+	0	NA	Intergenic	Intergenic	179839	NR_131011	75280	Mm.108492	NR_131011	ENSMUSG00000085452	4930554G24Rik	-	RIKEN cDNA 4930554G24 gene	ncRNA
chr5	133047546	133047956	+	0	NA	Intergenic	MLT1G|LTR|ERVL-MaLR	-504531	NM_001363480	319974	Mm.409595	NM_177047	ENSMUSG00000029673	Auts2	2700063G02Rik|A730011F23Rik|D830032G16Rik	autism susceptibility candidate 2	protein-coding
chr4	120259119	120260571	+	0	NA	Intergenic	Intergenic	27416	NM_194060	329934	Mm.277090	NM_194060	ENSMUSG00000052135	Foxo6	-	forkhead box O6	protein-coding
chr4	136730853	136731982	+	0	NA	intron (NM_010142, intron 3 of 15)	intron (NM_010142, intron 3 of 15)	104595	NM_001290753	13844	Mm.250981	NM_010142	ENSMUSG00000028664	Ephb2	Cek5|Drt|ETECK|Erk|Hek5|Nuk|Prkm5|Qek5|Sek3|Tyro5	Eph receptor B2	protein-coding
chr7	124748171	124748745	+	0	NA	Intergenic	Intergenic	-39523	NR_045907	73076	Mm.417827	NR_045907	ENSMUSG00000086254	3100003L05Rik	-	RIKEN cDNA 3100003L05 gene	ncRNA
chr8	70476498	70477348	+	0	NA	promoter-TSS (NM_001122830)	promoter-TSS (NM_001122830)	20	NM_001122830	234378	Mm.187090	NM_172052	ENSMUSG00000055707	Klhl26	C630013N10Rik|Klkl26	kelch-like 26	protein-coding
chr6	43204350	43204781	+	0	NA	Intergenic	L1_Mus2|LINE|L1	2919	NM_146653	258647	Mm.377612	NM_146653	ENSMUSG00000048693	Olfr435	MOR261-5	olfactory receptor 435	protein-coding
chr18	38092546	38093272	+	0	NA	Intergenic	Intergenic	-93940	NM_001205336	106952	Mm.247642	NM_139206	ENSMUSG00000024451	Arap3	Centd3|Drag1|E030006K04Rik|cnt-d3	ArfGAP with RhoGAP domain, ankyrin repeat and PH domain 3	protein-coding
chr11	69039911	69041899	+	0	NA	Intergenic	Intergenic	-4732	NM_011496	20877	Mm.3488	NM_011496	ENSMUSG00000020897	Aurkb	AIM-1|AIRK2|AL022959|Aik2|Aim1|Ark2|AurB|IPL1|STK-1|Stk12|Stk5	aurora kinase B	protein-coding
chr5	143403483	143404398	+	0	NA	5' UTR (NM_025841, exon 1 of 5)	5' UTR (NM_025841, exon 1 of 5)	120	NM_025841	66913	Mm.181880	NM_025841	ENSMUSG00000079111	Kdelr2	1110007A14Rik	KDEL (Lys-Asp-Glu-Leu) endoplasmic reticulum protein retention receptor 2	protein-coding
chr4	125127507	125128337	+	0	NA	promoter-TSS (NM_153159)	promoter-TSS (NM_153159)	-41	NM_153159	230738	Mm.402	NM_153159	ENSMUSG00000042677	Zc3h12a	BC036563|MCPIP|MCPIP-1|Mcpip1|Reg1	zinc finger CCCH type containing 12A	protein-coding
chr6	70116678	70117494	+	0	NA	Intergenic	Intergenic	675089	NM_009075	19895	Mm.17905	NM_009075	ENSMUSG00000053604	Rpia	RPI	ribose 5-phosphate isomerase A	protein-coding
chr10	48581952	48582459	+	0	NA	Intergenic	Intergenic	1205732	NM_001358866	14806	Mm.185993	NM_010349	ENSMUSG00000056073	Grik2	AW124492|C130030K03Rik|GluK2|Glur-6|Glur6|Glurbeta2	glutamate receptor, ionotropic, kainate 2 (beta 2)	protein-coding
chr15	14253663	14254959	+	0	NA	Intergenic	Intergenic	-1080636	NM_007666	12563	Mm.57048	NM_007666	ENSMUSG00000039385	Cdh6	cad6	cadherin 6	protein-coding
chr5	113145238	113145489	+	0	NA	intron (NM_172884, intron 1 of 7)	intron (NM_172884, intron 1 of 7)	-6778	NM_001347397	243219	Mm.160131	NM_172884	ENSMUSG00000051339	2900026A02Rik	8430408O14Rik|A530094D01|AW539426|Gm449|Kiaa1671|mKIAA1671	RIKEN cDNA 2900026A02 gene	protein-coding
chr12	111707794	111708341	+	0	NA	Intergenic	Intergenic	4886	NM_001324480	70369	Mm.44239	NM_027404	ENSMUSG00000049792	Bag5	1600025G07Rik|4930405J06Rik|Bag-5	BCL2-associated athanogene 5	protein-coding
chr4	134534500	134536144	+	0	NA	promoter-TSS (NM_001355188)	promoter-TSS (NM_001355188)	-54	NM_001355187	76824	Mm.30153	NM_029759	ENSMUSG00000046671	Mtfr1l	2410166I05Rik|AI480750|Fam54b	mitochondrial fission regulator 1-like	protein-coding
chr4	129716225	129716739	+	0	NA	intron (NR_045036, intron 8 of 11)	intron (NR_045036, intron 8 of 11)	-19637	NM_199305	230770	Mm.257157	NM_199305	ENSMUSG00000053730	Tmem39b	6330509E05Rik|BC037095	transmembrane protein 39b	protein-coding
chr7	139101422	139102337	+	0	NA	TTS (NM_011993)	TTS (NM_011993)	15878	NM_011993	26757	Mm.250414	NM_011993	ENSMUSG00000025478	Dpysl4	AI173505|CRMP-3|Crmp3|DPY4|Drp-4|Ulip4	dihydropyrimidinase-like 4	protein-coding
chr9	57764285	57767021	+	0	NA	5' UTR (NM_007713, exon 1 of 13)	5' UTR (NM_007713, exon 1 of 13)	207	NM_007713	102414	Mm.25720	NM_007713	ENSMUSG00000032316	Clk3	AI256811	CDC-like kinase 3	protein-coding
chr17	87332104	87332349	+	0	NA	intron (NM_028639, intron 10 of 19)	intron (NM_028639, intron 10 of 19)	49340	NM_028639	225049	Mm.77396	NM_028639	ENSMUSG00000036918	Ttc7	1110035E02Rik|1700007L07Rik|Ttc7a|fsn|hea	tetratricopeptide repeat domain 7	protein-coding
chr15	79796129	79796696	+	0	NA	intron (NM_001013360, intron 4 of 7)	intron (NM_001013360, intron 4 of 7)	8297	NM_030689	73340	Mm.38438	NM_030689	ENSMUSG00000022421	Nptxr	1200009K17Rik|1700036C17Rik|5730406O18Rik|AI452369|AI785356|D15Bwg0580e|NPR|Npcd	neuronal pentraxin receptor	protein-coding
chr1	132851811	132852116	+	0	NA	Intergenic	Intergenic	-28392	NM_010732	16980	Mm.39640	NM_010732	ENSMUSG00000026443	Lrrn2	5730406J09Rik|NLRR-2	leucine rich repeat protein 2, neuronal	protein-coding
chr10	101808307	101809222	+	0	NA	intron (NM_001205098, intron 1 of 7)	intron (NM_001205098, intron 1 of 7)	36072	NR_037211	100526516		NR_037211	ENSMUSG00000092952	Mir3059	mir-3059|mmu-mir-3059	microRNA 3059	ncRNA
chr1	114724682	114725085	+	0	NA	Intergenic	Intergenic	-959854	NM_001077425	636808	Mm.101576	NM_001077425	ENSMUSG00000070695	Cntnap5a	Caspr5-1|EG636808	contactin associated protein-like 5A	protein-coding
chr2	166636813	166637611	+	0	NA	intron (NM_177782, intron 4 of 39)	intron (NM_177782, intron 4 of 39)	72690	NR_152154	433503	Mm.491336	NR_152154		Gm29679	-	predicted gene, 29679	ncRNA
chr12	15123943	15124477	+	0	NA	Intergenic	(TC)n|Simple_repeat|Simple_repeat	-73821	NR_045960	73972	Mm.107680	NR_045960	ENSMUSG00000113644	4930448C13Rik	-	RIKEN cDNA 4930448C13 gene	ncRNA
chr7	79503069	79503301	+	0	NA	intron (NR_040313, intron 1 of 2)	intron (NR_040313, intron 1 of 2)	-2079	NR_029818	723968		NR_029818	ENSMUSG00000093238	Mir9-3	Mirn9-3|mir-9-3|mmu-mir-9-3	microRNA 9-3	ncRNA
chr14	106395510	106396093	+	0	NA	Intergenic	Intergenic	90719	NR_045938	73631	Mm.48862	NR_045938	ENSMUSG00000099794	1700128A07Rik	-	RIKEN cDNA 1700128A07 gene	ncRNA
chr6	119131069	119131405	+	0	NA	intron (NM_009781, intron 1 of 46)	intron (NM_009781, intron 1 of 46)	-22742	NM_001256002	12288	Mm.41628	NM_009781	ENSMUSG00000051331	Cacna1c	Cav1.2|Cchl1a1|D930026N18Rik|MBC|MELC-CC	calcium channel, voltage-dependent, L type, alpha 1C subunit	protein-coding
chr19	3943413	3943817	+	0	NA	exon (NM_019449, exon 8 of 11)	exon (NM_019449, exon 8 of 11)	8429	NM_001161428	54445	Mm.262094	NM_019449	ENSMUSG00000036908	Unc93b1	Unc-93B1|Unc93b	unc-93 homolog B1, TLR signaling regulator	protein-coding
chr4	118013199	118013671	+	0	NA	intron (NM_001285520, intron 5 of 11)	intron (NM_001285520, intron 5 of 11)	-83672	NM_009711	11876	Mm.56897	NM_009711	ENSMUSG00000028539	Artn	neublastin	artemin	protein-coding
chr18	34900423	34901897	+	0	NA	Intergenic	Intergenic	30843	NM_144866	225363	Mm.329353	NM_144866	ENSMUSG00000024360	Etf1	AI463371|D6Ertd109e|ERF|ERF1|SUP45L1|TB3-1	eukaryotic translation termination factor 1	protein-coding
chr4	51627110	51627769	+	0	NA	Intergenic	RMER17C|LTR|ERVK	410761	NM_001162865	74914	Mm.159368	NM_001162865	ENSMUSG00000039555	Cylc2	4930488P18Rik	cylicin, basic protein of sperm head cytoskeleton 2	protein-coding
chr7	31074095	31074993	+	0	NA	intron (NM_008557, intron 1 of 7)	intron (NM_008557, intron 1 of 7)	2153	NM_008557	17178	Mm.263847	NM_008557	ENSMUSG00000057092	Fxyd3	Mat8	FXYD domain-containing ion transport regulator 3	protein-coding
chr4	155894295	155894904	+	0	NA	intron (NM_207223, intron 1 of 24)	intron (NM_207223, intron 1 of 24)	2724	NM_207223	140500	Mm.219591	NM_207223	ENSMUSG00000029033	Acap3	Centb5|Kiaa1716-hp|mKIAA1716	ArfGAP with coiled-coil, ankyrin repeat and PH domains 3	protein-coding
chr5	128100138	128100657	+	0	NA	intron (NM_172885, intron 3 of 8)	intron (NM_172885, intron 3 of 8)	332680	NM_172885	243274	Mm.447698	NM_172885	ENSMUSG00000034310	Tmem132d	C630028F04Rik	transmembrane protein 132D	protein-coding
chr8	57114903	57115736	+	0	NA	Intergenic	RMER6C|LTR|ERVK	205540	NR_154048	102636514	Mm.229304	NR_110474	ENSMUSG00000100510	Hand2os1	Gm28063|Hand2-as1|Uph	Hand2, opposite strand 1	ncRNA
chr2	158409328	158410717	+	0	NA	promoter-TSS (NM_001369183)	promoter-TSS (NM_001369183)	-80	NM_001369183	228850	Mm.398185	NM_177227	ENSMUSG00000027652	Ralgapb	AI507211|B230339M05Rik|p170	Ral GTPase activating protein, beta subunit (non-catalytic)	protein-coding
chr10	77341116	77342243	+	0	NA	intron (NM_001024837, intron 2 of 10)	intron (NM_001024837, intron 2 of 10)	76594	NM_001024837	110532	Mm.276815	NM_130895	ENSMUSG00000020262	Adarb1	1700057H01Rik|AW124433|AW558573|Adar2|BB220382|D10Bwg0447e|Red1	adenosine deaminase, RNA-specific, B1	protein-coding
chr9	42069206	42069866	+	0	NA	intron (NM_001357261, intron 3 of 42)	intron (NM_001357261, intron 3 of 42)	7677	NM_001357261	20660	Mm.121920	NM_011436	ENSMUSG00000049313	Sorl1	2900010L19Rik|AI596264|AW261561|LR11|SorLA|gp250|mSorLA	sortilin-related receptor, LDLR class A repeats-containing	protein-coding
chr1	106901452	106901974	+	0	NA	Intergenic	Intergenic	-32736	NM_027971	71869	Mm.321740	NM_027971	ENSMUSG00000059956	Serpinb12	2300003F07Rik|4833409F13Rik	serine (or cysteine) peptidase inhibitor, clade B (ovalbumin), member 12	protein-coding
chr12	49885386	49886084	+	0	NA	Intergenic	Intergenic	-404873	NR_045472	69054	Mm.417838	NR_045472	ENSMUSG00000100844	1810007C17Rik	-	RIKEN cDNA 1810007C17 gene	ncRNA
chr2	31110148	31110530	+	0	NA	intron (NM_001038700, intron 1 of 14)	intron (NM_001038700, intron 1 of 14)	-13839	NM_001177650	14269	Mm.52297	NM_019406	ENSMUSG00000075415	Fnbp1	1110057E06Rik|2210010H06Rik|FBP1|Fbp17	formin binding protein 1	protein-coding
chr1	17608512	17608975	+	0	NA	intron (NM_053191, intron 2 of 5)	intron (NM_053191, intron 2 of 5)	6842	NM_053191	94227	Mm.442452	NM_053191	ENSMUSG00000067780	Pi15	P24TI|P25TI|PI-15|SugarCrisp	peptidase inhibitor 15	protein-coding
chr8	124181822	124182825	+	0	NA	Intergenic	Intergenic	-49071	NM_139272	108148	Mm.33808	NM_139272	ENSMUSG00000089704	Galnt2	AI480629	polypeptide N-acetylgalactosaminyltransferase 2	protein-coding
chr9	21494437	21495308	+	0	NA	intron (NM_001039520, intron 15 of 20)	B4|SINE|B4	1692	NR_029585	387194		NR_029585	ENSMUSG00000065547	Mir199a-1	Mirn199|Mirn199a-1|mir-199a-1	microRNA 199a-1	ncRNA
chr9	45534476	45535065	+	0	NA	intron (NM_001081270, intron 3 of 32)	intron (NM_001081270, intron 3 of 32)	-103538	NR_040732	74602	Mm.394117	NR_040732	ENSMUSG00000097074	4833428L15Rik	-	RIKEN cDNA 4833428L15 gene	ncRNA
chr5	15506674	15507662	+	0	NA	Intergenic	IAPEY4_LTR|LTR|ERVK	22054	NM_001310449	100861755	Mm.382859	NM_001310449	ENSMUSG00000106445	Gm21190	-	predicted gene, 21190	protein-coding
chr5	129514831	129516035	+	0	NA	intron (NM_172276, intron 6 of 17)	intron (NM_172276, intron 6 of 17)	14202	NM_172276	231769	Mm.288714	NM_172276	ENSMUSG00000029439	Sfswap	1190005N23Rik|6330437E22Rik|AI197402|AW212079|SWAP|Sfrs8|Srsf8	splicing factor SWAP	protein-coding
chr3	111069079	111070253	+	0	NA	Intergenic	Intergenic	-812237	NR_045362	625585	Mm.389497	NR_045362	ENSMUSG00000104543	Gm6602	-	predicted gene 6602	ncRNA
chr3	13502907	13503409	+	0	NA	intron (NM_001357034, intron 1 of 7)	intron (NM_001357034, intron 1 of 7)	30359	NM_001357036	76897	Mm.422625	NM_178631	ENSMUSG00000039717	Ralyl	0710005M24Rik	RALY RNA binding protein-like	protein-coding
chr12	112121581	112121964	+	0	NA	exon (NM_001081169, exon 10 of 15)	exon (NM_001081169, exon 10 of 15)	-9108	NR_029590	387199		NR_029590	ENSMUSG00000065574	Mir203	Mirn203|mir-203|mmu-mir-203	microRNA 203	ncRNA
chr8	101817130	101817564	+	0	NA	Intergenic	MTA_Mm-int|LTR|ERVL-MaLR	967764	NM_009866	12552	Mm.1571	NM_009866	ENSMUSG00000031673	Cdh11	Cad11|OSF-4	cadherin 11	protein-coding
chr2	26646754	26647344	+	0	NA	Intergenic	Intergenic	-6805	NR_024068	72091	Mm.27103	NR_024068		Snhg7	2610002F03Rik|AI427062	small nucleolar RNA host gene 7	ncRNA
chr16	62470004	62470564	+	0	NA	Intergenic	Intergenic	316432	NM_178925	106338	Mm.26321	NM_178925	ENSMUSG00000050312	Nsun3	6720484A09Rik|AU022521	NOL1/NOP2/Sun domain family member 3	protein-coding
chr9	56843557	56844293	+	0	NA	Intergenic	Intergenic	8038	NM_198673	382075	Mm.335177	NM_198673	ENSMUSG00000045620	Odf3l1	BC049697|Gm1116	outer dense fiber of sperm tails 3-like 1	protein-coding
chr10	80988011	80988476	+	0	NA	intron (NM_001038655, intron 2 of 3)	intron (NM_001038655, intron 2 of 3)	13122	NM_001038655	14708	Mm.222496	NM_010319	ENSMUSG00000048240	Gng7	AI840417	guanine nucleotide binding protein (G protein), gamma 7	protein-coding
chr11	116885337	116885711	+	0	NA	Intergenic	Intergenic	31524	NM_178620	69900	Mm.348004	NM_178620	ENSMUSG00000020818	Mfsd11	2600014M03Rik	major facilitator superfamily domain containing 11	protein-coding
chr5	85571406	85572310	+	0	NA	Intergenic	Intergenic	493725	NM_001345904	12617	Mm.4649	NM_007683	ENSMUSG00000029253	Cenpc1	CENP-C|Cenpc	centromere protein C1	protein-coding
chr6	70058236	70059397	+	0	NA	Intergenic	Intergenic	-731642	NR_004434	19783		NR_004434	ENSMUSG00000106222	Rprl1	Rmrp2|Rpr|Rprh2	ribonuclease P RNA-like 1	ncRNA
chr5	135834607	135835730	+	0	NA	exon (NM_021403, exon 2 of 15)	exon (NM_021403, exon 2 of 15)	17062	NM_021403	58212	Mm.271230	NM_021403	ENSMUSG00000039860	Srrm3	2900083I11Rik|AB041661|SRm300-like|Srrm2l	serine/arginine repetitive matrix 3	protein-coding
chr11	99132083	99132393	+	0	NA	Intergenic	Intergenic	22839	NM_007719	12775	Mm.2932	NM_007719	ENSMUSG00000037944	Ccr7	CC-CKR-7|CCR-7|CD197|Cdw197|Cmkbr7|EBI1|Ebi1h	chemokine (C-C motif) receptor 7	protein-coding
chr5	12564756	12565183	+	0	NA	intron (NM_028882, intron 12 of 17)	intron (NM_028882, intron 12 of 17)	181803	NM_028882	108151	Mm.89313	NM_028882	ENSMUSG00000040254	Sema3d	4631426B19Rik	sema domain, immunoglobulin domain (Ig), short basic domain, secreted, (semaphorin) 3D	protein-coding
chr19	5041068	5041720	+	0	NA	promoter-TSS (NM_134155)	promoter-TSS (NM_134155)	40	NM_134155	107392	Mm.29628	NM_134155	ENSMUSG00000080268	Brms1	AV003220|AW554636	breast cancer metastasis-suppressor 1	protein-coding
chr15	98689549	98690273	+	0	NA	Intergenic	Intergenic	-12450	NM_172612	223881	Mm.274010	NM_172612	ENSMUSG00000054855	Rnd1	A830014L09Rik|Arhs	Rho family GTPase 1	protein-coding
chr1	115144310	115145170	+	0	NA	Intergenic	RLTR22_Mur|LTR|ERVK	-539997	NM_001077425	636808	Mm.101576	NM_001077425	ENSMUSG00000070695	Cntnap5a	Caspr5-1|EG636808	contactin associated protein-like 5A	protein-coding
chr1	145891842	145892234	+	0	NA	Intergenic	Intergenic	-603591	NM_001357571	215378	Mm.441817	NM_153539	ENSMUSG00000035131	Brinp3	B830045N13Rik|Fam5c	bone morphogenetic protein/retinoic acid inducible neural specific 3	protein-coding
chr5	129608467	129609654	+	0	NA	TTS (NM_011846)	TTS (NM_011846)	24891	NM_011846	23948	Mm.42047	NM_011846	ENSMUSG00000029436	Mmp17	MT4-MMP|MT4MMP|MTMMP4	matrix metallopeptidase 17	protein-coding
chr10	53649656	53650320	+	0	NA	intron (NM_001081428, intron 11 of 17)	intron (NM_001081428, intron 11 of 17)	-20031	NM_027830	71567	Mm.278221	NM_027830	ENSMUSG00000058298	Mcm9	9030408O17Rik|Gm235|Mcmdc1	minichromosome maintenance 9 homologous recombination repair factor	protein-coding
chr1	104815282	104815864	+	0	NA	intron (NM_011800, intron 1 of 11)	intron (NM_011800, intron 1 of 11)	47053	NM_011800	23836	Mm.103640	NM_011800	ENSMUSG00000050840	Cdh20	Cdh7	cadherin 20	protein-coding
chr17	26424880	26425400	+	0	NA	intron (NM_001081656, intron 1 of 4)	intron (NM_001081656, intron 1 of 4)	10281	NM_001081656	240055	Mm.133211	NM_001081656	ENSMUSG00000034413	Neurl1b	C230078M08Rik|EG240055	neuralized E3 ubiquitin protein ligase 1B	protein-coding
chr7	29070458	29071919	+	0	NA	intron (NM_009109, intron 49 of 105)	intron (NM_009109, intron 49 of 105)	12506	NR_035489	100316710		NR_035489	ENSMUSG00000089219	Mir1963	mir-1963|mmu-mir-1963	microRNA 1963	ncRNA
chr11	106193074	106194082	+	0	NA	promoter-TSS (NM_001252448)	promoter-TSS (NM_001252448)	25	NM_001252449	72149	Mm.403722	NM_028126	ENSMUSG00000069631	Strada	2610019A05Rik|6030402H20Rik|AI480680|E130112C09Rik	STE20-related kinase adaptor alpha	protein-coding
chr18	58020866	58021691	+	0	NA	intron (NM_010181, intron 59 of 64)	intron (NM_010181, intron 59 of 64)	142600	NM_009194	20496	Mm.399997	NM_009194	ENSMUSG00000024597	Slc12a2	9330166H04Rik|Nkcc1|mBSC2|sy-ns	solute carrier family 12, member 2	protein-coding
chr13	54391387	54391775	+	0	NA	Intergenic	MIR3|SINE|MIR	20232	NM_009946	12890	Mm.268902	NM_009946	ENSMUSG00000025867	Cplx2	921-L|AI413745|AW492120|Gm34843	complexin 2	protein-coding
chr4	132211618	132212536	+	0	NA	5' UTR (NM_145393, exon 1 of 5)	5' UTR (NM_145393, exon 1 of 5)	179	NM_145393	213541	Mm.23998	NM_145393	ENSMUSG00000040025	Ythdf2	9430020E02Rik|HGRG8|NY-REN-2	YTH N6-methyladenosine RNA binding protein 2	protein-coding
chr8	84965693	84966384	+	0	NA	promoter-TSS (NM_001364370)	promoter-TSS (NM_001364370)	38	NM_001364370	69724	Mm.182470	NM_027187	ENSMUSG00000052926	Rnaseh2a	2400006P09Rik|RNASEHI|RNHIA|RNHL	ribonuclease H2, large subunit	protein-coding
chr5	79706347	79707051	+	0	NA	Intergenic	Intergenic	-1313872	NM_001347367	319387	Mm.273631	NM_198702	ENSMUSG00000037605	Adgrl3	5430402I23Rik|CIRL-3|D130075K09Rik|Gm1379|LEC3|Lphn3|mKIAA0768	adhesion G protein-coupled receptor L3	protein-coding
chr9	63756666	63758457	+	0	NA	exon (NM_016769, exon 1 of 9)	exon (NM_016769, exon 1 of 9)	433	NM_016769	17127	Mm.7320	NM_016769	ENSMUSG00000032402	Smad3	AU022421|Madh3	SMAD family member 3	protein-coding
chr10	114956233	114956761	+	0	NA	Intergenic	Intergenic	154771	NR_155864	102633245		NR_155864		Gm15723	-	predicted gene 15723	ncRNA
chr6	43243114	43244123	+	0	NA	Intergenic	Intergenic	8008	NM_146370	18346	Mm.222840	NM_146370	ENSMUSG00000061210	Olfr47	IB12|MOR261-9|Olfr13	olfactory receptor 47	protein-coding
chr15	78064208	78064849	+	0	NA	intron (NM_007583, intron 1 of 3)	intron (NM_007583, intron 1 of 3)	54752	NM_007583	12300	Mm.277338	NM_007583	ENSMUSG00000019146	Cacng2	AW060990|B230105C07Rik|B930041E13Rik|stargazer|stargazin|stg|wag|waggler	calcium channel, voltage-dependent, gamma subunit 2	protein-coding
chr4	140665208	140666110	+	0	NA	intron (NM_001112722, intron 1 of 27)	intron (NM_001112722, intron 1 of 27)	228	NM_001290803	72754	Mm.29329	NM_172415	ENSMUSG00000040964	Arhgef10l	2810441C07Rik	Rho guanine nucleotide exchange factor (GEF) 10-like	protein-coding
chr10	33945647	33946620	+	0	NA	intron (NR_153113, intron 3 of 9)	intron (NR_153113, intron 3 of 9)	5126	NM_001359455	72580	Mm.248081	NM_028287	ENSMUSG00000039531	Zup1	2700019D07Rik|DUB|Zufsp	zinc finger containing ubiquitin peptidase 1	protein-coding
chr2	155629072	155629643	+	0	NA	exon (NM_001085378, exon 29 of 42)	exon (NM_001085378, exon 29 of 42)	6477	NR_030757	735275		NR_030757	ENSMUSG00000076312	Mir499	Mirn499|mir-499|mmu-mir-499	microRNA 499	ncRNA
chr2	164113792	164114252	+	0	NA	intron (NM_021420, intron 9 of 10)	intron (NM_021420, intron 9 of 10)	39884	NM_021420	58231	Mm.234472	NM_021420	ENSMUSG00000018209	Stk4	AI447339|AU020804|Kas-2|Mst1|Ysk3	serine/threonine kinase 4	protein-coding
chr6	61382594	61383182	+	0	NA	intron (NM_183310, intron 4 of 10)	intron (NM_183310, intron 4 of 10)	-202078	NR_040287	100504262	Mm.438066	NR_040287		A730020E08Rik	-	RIKEN cDNA A730020E08 gene	ncRNA
chr7	30193877	30195315	+	0	NA	intron (NM_009795, intron 1 of 10)	intron (NM_009795, intron 1 of 10)	557	NM_009795	12336	Mm.439782	NM_009795	ENSMUSG00000001794	Capns1	Capa-4|Capa4|Capn4|Cdps|Css1|D7Ertd146e	calpain, small subunit 1	protein-coding
chr5	144914028	144915355	+	0	NA	intron (NM_001038627, intron 1 of 17)	intron (NM_001038627, intron 1 of 17)	-17875	NR_106006	102465629		NR_106006	ENSMUSG00000098822	Mir7039	Gm27824|mmu-mir-7039	microRNA 7039	ncRNA
chr4	117886935	117887816	+	0	NA	promoter-TSS (NM_033617)	promoter-TSS (NM_033617)	-46	NM_033617	114143	Mm.207052	NM_033617	ENSMUSG00000033379	Atp6v0b	2310024H13Rik|Atp6f|VMA16	ATPase, H+ transporting, lysosomal V0 subunit B	protein-coding
chr9	58169498	58169841	+	0	NA	Intergenic	B4A|SINE|B4	-10448	NM_012043	26968	Mm.367887	NM_012043	ENSMUSG00000037206	Islr	AW553146|Meflin	immunoglobulin superfamily containing leucine-rich repeat	protein-coding
chr1	95016605	95016893	+	0	NA	Intergenic	Intergenic	219307	NR_040473	74689	Mm.399187	NR_040473	ENSMUSG00000100518	4930440C22Rik	-	RIKEN cDNA 4930440C22 gene	ncRNA
chr15	79140750	79141736	+	0	NA	promoter-TSS (NM_001310576)	promoter-TSS (NM_001310576)	8	NM_001310579	27660	Mm.390827	NM_138581	ENSMUSG00000033029	1700088E04Rik	ESTJ0827E04	RIKEN cDNA 1700088E04 gene	protein-coding
chr1	41674281	41674831	+	0	NA	Intergenic	Intergenic	-493304	NR_040475	74897	Mm.243822	NR_040475	ENSMUSG00000104072	4930448I06Rik	-	RIKEN cDNA 4930448I06 gene	ncRNA
chr10	128110174	128110712	+	0	NA	intron (NM_054078, intron 3 of 29)	intron (NM_054078, intron 3 of 29)	17660	NM_054078	116848	Mm.252213	NM_054078	ENSMUSG00000040054	Baz2a	AA415431|C030005G16Rik|C78388|Tip5|Walp3|mKIAA0314	bromodomain adjacent to zinc finger domain, 2A	protein-coding
chr5	39761001	39761515	+	0	NA	Intergenic	Intergenic	-116627	NM_010474	15476	Mm.12559	NM_010474	ENSMUSG00000051022	Hs3st1	3-Ost|D5Wsu110e|Hsg3ost	heparan sulfate (glucosamine) 3-O-sulfotransferase 1	protein-coding
chr9	64399196	64399624	+	0	NA	intron (NM_172522, intron 1 of 22)	intron (NM_172522, intron 1 of 22)	13784	NM_001134399	214058	Mm.127721	NM_172522	ENSMUSG00000036466	Megf11	2410080H04Rik|D130061K05	multiple EGF-like-domains 11	protein-coding
chr11	77078031	77078879	+	0	NA	promoter-TSS (NR_030756)	promoter-TSS (NR_030756)	-18	NM_001012309	237859	Mm.156195	NM_001012309	ENSMUSG00000037958	Nsrp1	8030451K07|AI851076|AL022898|Ccdc55|NSpr70|NSrp70	nuclear speckle regulatory protein 1	protein-coding
chr4	152784767	152785196	+	0	NA	Intergenic	Intergenic	87441	NR_033138	330004	Mm.291863	NM_001033414		Gm833	-	predicted gene 833	ncRNA
chr15	98734153	98734855	+	0	NA	Intergenic	Intergenic	-6306	NM_024169	66120	Mm.30729	NM_024169	ENSMUSG00000003355	Fkbp11	1110002O23Rik|FKBP-11	FK506 binding protein 11	protein-coding
chr8	123653412	123654556	+	0	NA	promoter-TSS (NM_133955)	promoter-TSS (NM_133955)	55	NM_133955	69581	Mm.168257	NM_133955	ENSMUSG00000039960	Rhou	2310026M05Rik|AI182090|Arhu|CDC42L1|G28K|WRCH-1|WRCH1|mG28K	ras homolog family member U	protein-coding
chr10	22148484	22149654	+	0	NA	5' UTR (NM_001254744, exon 1 of 2)	5' UTR (NM_001254744, exon 1 of 2)	201	NM_001254744	319887	Mm.177746	NM_001254744	ENSMUSG00000097327	E030030I06Rik	-	RIKEN cDNA E030030I06 gene	protein-coding
chr9	121748220	121748508	+	0	NA	exon (NM_010918, exon 13 of 17)	exon (NM_010918, exon 13 of 17)	11579	NR_033503	320301	Mm.373883	NR_033503		E530011L22Rik	-	RIKEN cDNA E530011L22 gene	ncRNA
chr1	44624248	44624933	+	0	NA	intron (NM_028450, intron 1 of 10)	Lx2|LINE|L1	72919	NM_028450	70676	Mm.133132	NM_027506	ENSMUSG00000056870	Gulp1	3110030A04Rik|5730529O06Rik|CED-6|Ced6|GULP|Gulp-2	GULP, engulfment adaptor PTB domain containing 1	protein-coding
chr17	27762862	27763252	+	0	NA	intron (NM_001271511, intron 3 of 3)	intron (NM_001271511, intron 3 of 3)	-32054	NM_001357728	30051	Mm.26768	NM_013891	ENSMUSG00000024215	Spdef	PDEF|Pse	SAM pointed domain containing ets transcription factor	protein-coding
chr4	20247726	20248366	+	0	NA	intron (NM_172987, intron 4 of 4)	intron (NM_172987, intron 4 of 4)	205994	NM_010281	14590	Mm.20461	NM_010281	ENSMUSG00000073987	Ggh	gamma-GH	gamma-glutamyl hydrolase	protein-coding
chr11	102384319	102384813	+	0	NA	Intergenic	Intergenic	-7546	NR_131196	105463053	Mm.403323	NR_131196	ENSMUSG00000087330	Bloodlinc	Gm11616	Bloodlinc, erythroid developmental long intergenic non-protein coding transcript	ncRNA
chr9	44737398	44737843	+	0	NA	Intergenic	Intergenic	-2422	NM_153537	102693	Mm.28639	NM_153537	ENSMUSG00000048537	Phldb1	AU041016|D330037A14Rik|Ll5a	pleckstrin homology like domain, family B, member 1	protein-coding
chr11	118714793	118715709	+	0	NA	intron (NM_001039168, intron 2 of 14)	intron (NM_001039168, intron 2 of 14)	45790	NM_001285438	52897	Mm.341103	NM_001024931	ENSMUSG00000025576	Rbfox3	Fox-3|Hrnbp3|NeuN|Neuna60	RNA binding protein, fox-1 homolog (C. elegans) 3	protein-coding
chr17	27466071	27466593	+	0	NA	intron (NM_001013385, intron 2 of 8)	intron (NM_001013385, intron 2 of 8)	30202	NM_001360192	268934	Mm.358940	NM_001013385	ENSMUSG00000063239	Grm4	Gprc1d|mGluR4	glutamate receptor, metabotropic 4	protein-coding
chr1	150751374	150751996	+	0	NA	intron (NM_001024720, intron 19 of 106)	intron (NM_001024720, intron 19 of 106)	241750	NM_001024720	545370	Mm.379425	NM_001024720	ENSMUSG00000066842	Hmcn1	EG545370|FIBL-6|Gm201	hemicentin 1	protein-coding
chr9	106371228	106372096	+	0	NA	intron (NM_153459, intron 2 of 2)	intron (NM_153459, intron 2 of 2)	3030	NM_153459	235584	Mm.275584	NM_153459	ENSMUSG00000053716	Dusp7	AU015694|Mkpx|Pyst2	dual specificity phosphatase 7	protein-coding
chr5	115613053	115613887	+	0	NA	exon (NM_172719, exon 46 of 58)	exon (NM_172719, exon 46 of 58)	18346	NR_027810	66123	Mm.133063	NM_021417	ENSMUSG00000107121	1110006O24Rik	-	RIKEN cDNA 1110006O24 gene	ncRNA
chr2	123533038	123533734	+	0	NA	Intergenic	Intergenic	-556583	NM_001290997	214968	Mm.330536	NM_172537	ENSMUSG00000027200	Sema6d	1110067B02Rik|AA409156|D330011G23|mKIAA1479	sema domain, transmembrane domain (TM), and cytoplasmic domain, (semaphorin) 6D	protein-coding
chr6	70703922	70704198	+	0	NA	Intergenic	Intergenic	88115	NM_009075	19895	Mm.17905	NM_009075	ENSMUSG00000053604	Rpia	RPI	ribose 5-phosphate isomerase A	protein-coding
chr2	156605082	156606195	+	0	NA	Intergenic	MIR|SINE|MIR	7784	NR_040372	100504350	Mm.94426	NR_040372	ENSMUSG00000086118	Gm14169	-	predicted gene 14169	ncRNA
chr5	125550459	125550989	+	0	NA	intron (NM_001190352, intron 1 of 8)	intron (NM_001190352, intron 1 of 8)	18306	NM_001190352	208151	Mm.40397	NM_001190352	ENSMUSG00000070498	Tmem132b	AK220418|mKIAA1786	transmembrane protein 132B	protein-coding
chr9	41442233	41442805	+	0	NA	intron (NR_131928, intron 3 of 4)	intron (NR_131928, intron 3 of 4)	-32374	NR_131930	73144	Mm.38166	NM_001033153	ENSMUSG00000074415	Mir100hg	2610203C20Rik|3110039I08Rik|AI848448|D230004N17Rik|D3Mgi9	Mir100 Mirlet7a-2 Mir125b-1 cluster host gene	ncRNA
chr15	85274416	85275355	+	0	NA	intron (NM_010180, intron 16 of 16)	intron (NM_010180, intron 16 of 16)	-61370	NM_016843	54138	Mm.248906	NM_016843	ENSMUSG00000016541	Atxn10	AI325283|C77170|E46|Sca10|TEG-169|Tex169	ataxin 10	protein-coding
chr11	94498335	94499328	+	0	NA	intron (NM_027984, intron 1 of 9)	intron (NM_027984, intron 1 of 9)	1143	NM_001361558	71889	Mm.248620	NM_027984	ENSMUSG00000010080	Epn3	2310022G12Rik	epsin 3	protein-coding
chr12	11516134	11517244	+	0	NA	Intergenic	Intergenic	60634	NM_001111118	209550		NM_001111118	ENSMUSG00000086022	Rad51ap2	EG209550	RAD51 associated protein 2	protein-coding
chr18	7929378	7930578	+	0	NA	TTS (NM_001360956)	TTS (NM_001360956)	60265	NM_001360956	225131	Mm.204524	NM_153085	ENSMUSG00000024283	Wac	1110067P07Rik|A230035H12Rik|AI256735|AI256776|Wwp4	WW domain containing adaptor with coiled-coil	protein-coding
chr6	25277716	25278326	+	0	NA	Intergenic	Lx8b|LINE|L1	-321896	NM_177013	319832	Mm.127446	NM_177013	ENSMUSG00000048022	Tmem229a	6332401O19Rik	transmembrane protein 229A	protein-coding
chr4	155812010	155813079	+	0	NA	promoter-TSS (NM_207678)	promoter-TSS (NM_207678)	55	NM_207678	56036	Mm.23492	NM_018856	ENSMUSG00000029068	Ccnl2	1700010A01Rik|1810019L15Rik|2010319M22Rik|AA409936|AW261738|Ania-6b|HCLA-150|Pcee|SB138	cyclin L2	protein-coding
chr7	45784652	45785698	+	0	NA	promoter-TSS (NM_001290990)	promoter-TSS (NM_001290990)	-205	NM_001290990	381983	Mm.44928	NM_001005511	ENSMUSG00000062044	Lmtk3	BC059845|aatyk3	lemur tyrosine kinase 3	protein-coding
chr8	120214072	120214290	+	0	NA	intron (NR_110496, intron 2 of 2)	intron (NR_110496, intron 2 of 2)	14049	NR_110496	434353	Mm.411793	NR_110496	ENSMUSG00000097960	A330074K22Rik	-	RIKEN cDNA A330074K22 gene	ncRNA
chr4	140147655	140148621	+	0	NA	intron (NM_198610, intron 2 of 9)	intron (NM_198610, intron 2 of 9)	5265	NR_153821	102636673	Mm.449180	NR_153821		Gm13029	Gm33676	predicted gene 13029	ncRNA
chr6	113742956	113743564	+	0	NA	TTS (NM_001347365)	TTS (NM_001347365)	-2579	NM_024206	110379	Mm.29296	NM_024206	ENSMUSG00000030298	Sec13	1110003H02Rik|Sec13l1|Sec13r	SEC13 homolog, nuclear pore and COPII coat complex component	protein-coding
chr11	80577830	80578227	+	0	NA	intron (NM_177390, intron 20 of 21)	intron (NM_177390, intron 20 of 21)	-68922	NR_126552	77417	Mm.437510	NR_126552	ENSMUSG00000085078	C030013C21Rik	-	RIKEN cDNA C030013C21 gene	ncRNA
chr6	88784700	88785602	+	0	NA	intron (NM_001166249, intron 3 of 7)	intron (NM_001166249, intron 3 of 7)	56784	NM_030251	80283	Mm.166858	NM_030251	ENSMUSG00000030083	Abtb1	AI847549|BC003234|BPOZ|EF1ABP	ankyrin repeat and BTB (POZ) domain containing 1	protein-coding
chr1	87721050	87721907	+	0	NA	TTS (NM_001110193)	TTS (NM_001110193)	34268	NR_157047	102636458		NR_157046		Gm33517	-	predicted gene, 33517	ncRNA
chr4	91120363	91120913	+	0	NA	Intergenic	Intergenic	251417	NM_010486	15569	Mm.318042	NM_010486	ENSMUSG00000008489	Elavl2	Hub|mel-N1	ELAV like RNA binding protein 1	protein-coding
chr6	75570171	75571035	+	0	NA	Intergenic	Lx7|LINE|L1	-1671874	NR_155300	74342	Mm.292568	NM_028880	ENSMUSG00000060780	Lrrtm1	4632401D06Rik|AW125451	leucine rich repeat transmembrane neuronal 1	protein-coding
chr9	107901121	107901822	+	0	NA	exon (NM_028369, exon 4 of 6)	exon (NM_028369, exon 4 of 6)	-5418	NR_109782	19882	Mm.3901	NM_009074	ENSMUSG00000032584	Mst1r	CD136|CDw136|Fv-2|Fv2|PTK8|Ron|STK	macrophage stimulating 1 receptor (c-met-related tyrosine kinase)	protein-coding
chr16	31876213	31877784	+	0	NA	Intergenic	Intergenic	-1812	NM_013900	30060	Mm.30988	NM_013900	ENSMUSG00000022780	Meltf	CD228|MTf|Mfi2	melanotransferrin	protein-coding
chr11	70169540	70169913	+	0	NA	intron (NM_001204252, intron 6 of 9)	intron (NM_001204252, intron 6 of 9)	3103	NM_001204252	17312	Mm.252405	NM_010796	ENSMUSG00000000318	Clec10a	CD301a|M-ASGP-BP-1|Mgl|Mgl1	C-type lectin domain family 10, member A	protein-coding
chr5	82528741	82529329	+	0	NA	Intergenic	Intergenic	270030	NR_035415	100316803		NR_035415	ENSMUSG00000080586	Mir1187	Mirn1187|mir-1187|mmu-mir-1187	microRNA 1187	ncRNA
chr6	43231162	43231736	+	0	NA	Intergenic	Intergenic	-4161	NM_146370	18346	Mm.222840	NM_146370	ENSMUSG00000061210	Olfr47	IB12|MOR261-9|Olfr13	olfactory receptor 47	protein-coding
chr11	103332547	103334402	+	0	NA	exon (NM_133715, exon 14 of 16)	exon (NM_133715, exon 14 of 16)	11228	NM_133715	544817	Mm.259113	NM_133715	ENSMUSG00000034255	Arhgap27	2310069I04Rik|5730442P18Rik|Gm21552|Sh3d20	Rho GTPase activating protein 27	protein-coding
chr5	122034964	122035565	+	0	NA	intron (NM_007804, intron 2 of 22)	intron (NM_007804, intron 2 of 22)	12561	NM_007804	13048	Mm.156172	NM_007804	ENSMUSG00000042589	Cux2	1700051K22Rik|Cutl2|Cux-2	cut-like homeobox 2	protein-coding
chr4	154741837	154742146	+	0	NA	Intergenic	MIR3|SINE|MIR	-74124	NM_028513	73353	Mm.30958	NM_028513	ENSMUSG00000051276	Actrt2	1700052K15Rik|Arp-T2|Arpm2	actin-related protein T2	protein-coding
chr2	32112497	32113300	+	0	NA	Intergenic	Intergenic	17370	NM_001355238	227721	Mm.257236	NM_145521	ENSMUSG00000051373	Plpp7	D830019K17Rik|NET39|Ppapdc3	phospholipid phosphatase 7 (inactive)	protein-coding
chr6	61252738	61253603	+	0	NA	intron (NM_183310, intron 1 of 10)	intron (NM_183310, intron 1 of 10)	-72360	NR_040287	100504262	Mm.438066	NR_040287		A730020E08Rik	-	RIKEN cDNA A730020E08 gene	ncRNA
chr9	112905849	112906410	+	0	NA	Intergenic	AmnSINE1|SINE|Deu	649555	NR_033433	620760	Mm.259863	NR_015468	ENSMUSG00000087038	2900079G21Rik	C130083B14|Gm6179	RIKEN cDNA 2900079G21 gene	ncRNA
chr15	81010065	81010511	+	0	NA	intron (NM_001357669, intron 14 of 20)	intron (NM_001357669, intron 14 of 20)	32523	NM_134091	105835	Mm.274943	NM_134091	ENSMUSG00000042303	Sgsm3	1810012I01Rik|AI428557|BB175482|Cip85|R75178|RUSC3|Rutbc3	small G protein signaling modulator 3	protein-coding
chr4	138380319	138380817	+	0	NA	Intergenic	Intergenic	-12613	NM_028176	72269	Mm.46182	NM_028176	ENSMUSG00000028755	Cda	2210401N16Rik	cytidine deaminase	protein-coding
chr13	105420517	105421038	+	0	NA	Intergenic	Intergenic	-22916	NM_008308	15550	Mm.4716	NM_008308	ENSMUSG00000021721	Htr1a	Gpcr18	5-hydroxytryptamine (serotonin) receptor 1A	protein-coding
chr16	69468862	69470167	+	0	NA	Intergenic	Intergenic	330867	NR_130991	78110	Mm.211406	NR_130991	ENSMUSG00000107073	4930428D20Rik	Gm43265	RIKEN cDNA 4930428D20 gene	ncRNA
chr15	88861707	88862746	+	0	NA	promoter-TSS (NM_145478)	promoter-TSS (NM_145478)	32	NM_145478	223775	Mm.400129	NM_145478	ENSMUSG00000035828	Pim3	BC026639|Kid1	proviral integration site 3	protein-coding
chr9	45408073	45408802	+	0	NA	intron (NR_028499, intron 3 of 5)	intron (NR_028499, intron 3 of 5)	2360	NM_007503	11936	Mm.22742	NM_007503	ENSMUSG00000059412	Fxyd2	Atp1g1	FXYD domain-containing ion transport regulator 2	protein-coding
chr19	6421330	6421615	+	0	NA	intron (NM_001369363, intron 1 of 22)	intron (NM_001369363, intron 1 of 22)	2716	NM_020253	18190	Mm.329616	NM_020253	ENSMUSG00000033768	Nrxn2	6430591O13Rik|mKIAA0921	neurexin II	protein-coding
chr19	7416776	7418557	+	0	NA	promoter-TSS (NM_175381)	promoter-TSS (NM_175381)	41	NM_175381	108899	Mm.386838	NM_175381	ENSMUSG00000053080	2700081O15Rik	AI255177|AI848741|AW742297	RIKEN cDNA 2700081O15 gene	protein-coding
chr1	33148940	33149288	+	0	NA	Intergenic	Intergenic	520680	NM_008922	19076	Mm.27705	NM_008922	ENSMUSG00000026134	Prim2	AI323589	DNA primase, p58 subunit	protein-coding
chr4	72250598	72251142	+	0	NA	Intergenic	MER63A|DNA|hAT-Blackjack	49626	NR_027923	68285	Mm.37541	NR_027923		C630043F03Rik	AI851307	RIKEN cDNA C630043F03 gene	ncRNA
chr18	36280485	36281565	+	0	NA	promoter-TSS (NM_008989)	promoter-TSS (NM_008989)	-80	NM_008989	19290	Mm.44643	NM_008989	ENSMUSG00000043991	Pura	6330411E07Rik|CAGER-1|Pur-alpha|ssCRE-BP	purine rich element binding protein A	protein-coding
chr9	59675590	59675961	+	0	NA	intron (NM_011099, intron 9 of 10)	intron (NM_011099, intron 9 of 10)	19407	NM_011099	18746	Mm.326167	NM_011099	ENSMUSG00000032294	Pkm	AA414905|AL024370|AL024424|Pk-2|Pk-3|Pk3|Pkm2	pyruvate kinase, muscle	protein-coding
chr2	30178049	30178865	+	0	NA	promoter-TSS (NM_172660)	promoter-TSS (NM_172660)	2	NM_172660	227695	Mm.4449	NM_172660	ENSMUSG00000039660	Spout1	9930028P05|AL033358|CENP-32|D2Wsu81e	SPOUT domain containing methyltransferase 1	protein-coding
chr2	153049218	153049768	+	0	NA	intron (NM_001011732, intron 1 of 2)	intron (NM_001011732, intron 1 of 2)	-16462	NM_145536	228788	Mm.299979	NM_145536	ENSMUSG00000027474	Ccm2l	-	cerebral cavernous malformation 2-like	protein-coding
chr5	131024397	131025005	+	0	NA	intron (NM_145218, intron 5 of 10)	intron (NM_145218, intron 5 of 10)	282821	NM_145218	212996	Mm.299204	NM_145218	ENSMUSG00000034040	Galnt17	AA388321|E330012B09Rik|Galnt19|Gcap8|Wbscr17	polypeptide N-acetylgalactosaminyltransferase 17	protein-coding
chr2	106584374	106584810	+	0	NA	Intergenic	Intergenic	-61489	NR_040637	329483	Mm.246777	NR_040637	ENSMUSG00000087226	Gm14015	9330126M15	predicted gene 14015	ncRNA
chr4	124210044	124210526	+	0	NA	Intergenic	Intergenic	275674	NR_040774	78460	Mm.452060	NR_040774		1700057H15Rik	-	RIKEN cDNA 1700057H15 gene	ncRNA
chr15	98675266	98676220	+	0	NA	intron (NM_172612, intron 2 of 4)	intron (NM_172612, intron 2 of 4)	1718	NM_172612	223881	Mm.274010	NM_172612	ENSMUSG00000054855	Rnd1	A830014L09Rik|Arhs	Rho family GTPase 1	protein-coding
chr1	75555924	75556863	+	0	NA	intron (NM_001357150, intron 19 of 22)	intron (NM_001357150, intron 19 of 22)	9931	NM_001357150	20536	Mm.5053	NM_009208	ENSMUSG00000006576	Slc4a3	A930038D23Rik|Ae3	solute carrier family 4 (anion exchanger), member 3	protein-coding
chr5	130562693	130563072	+	0	NA	intron (NM_181045, intron 3 of 6)	intron (NM_181045, intron 3 of 6)	114090	NM_021371	140904	Mm.40875	NM_021371	ENSMUSG00000060371	Caln1	9630012C17Rik|Cabp8|MNCb-0849	calneuron 1	protein-coding
chr8	74582253	74583241	+	0	NA	Intergenic	Intergenic	-290427	NM_001294278	71597	Mm.158735	NM_027837	ENSMUSG00000031621	Isx	9130012O13Rik|Pix-1	intestine specific homeobox	protein-coding
chr11	9568192	9568905	+	0	NA	intron (NM_178259, intron 50 of 61)	intron (NM_178259, intron 50 of 61)	376606	NM_178259	268379	Mm.39270	NM_178259	ENSMUSG00000004668	Abca13	9830132L24|A930002G16Rik|AI956815	ATP-binding cassette, sub-family A (ABC1), member 13	protein-coding
chr8	120316850	120317693	+	0	NA	Intergenic	MIR|SINE|MIR	-89041	NR_110496	434353	Mm.411793	NR_110496	ENSMUSG00000097960	A330074K22Rik	-	RIKEN cDNA A330074K22 gene	ncRNA
chr11	100914080	100914766	+	0	NA	intron (NM_213659, intron 1 of 23)	intron (NM_213659, intron 1 of 23)	25117	NM_011486	20848	Mm.249934	NM_011486	ENSMUSG00000004040	Stat3	1110034C02Rik|AW109958|Aprf	signal transducer and activator of transcription 3	protein-coding
chr14	63923658	63924341	+	0	NA	Intergenic	Intergenic	-19707	NM_011446	20680	Mm.42162	NM_011446	ENSMUSG00000063060	Sox7	-	SRY (sex determining region Y)-box 7	protein-coding
chr4	131500888	131502028	+	0	NA	Intergenic	Intergenic	336820	NM_011214	19273	Mm.4860	NM_011214	ENSMUSG00000028909	Ptpru	Ftp-1|PCP-2|PTP|PTP-lambda|PTPlambda|Pcp2|Ptpf|Ptprl|R-PTP-U|R-PTP-psi|RPTPlambda	protein tyrosine phosphatase, receptor type, U	protein-coding
chr5	130411258	130412391	+	0	NA	intron (NM_181045, intron 1 of 6)	intron (NM_181045, intron 1 of 6)	-27193	NM_198665	381673	Mm.192133	NM_198665	ENSMUSG00000052014	A330070K13Rik	Gm1051	RIKEN cDNA A330070K13 gene	protein-coding
chr16	21714522	21714987	+	0	NA	Intergenic	Intergenic	-20089	NM_001001881	72190	Mm.131606	NM_001001881	ENSMUSG00000043391	2510009E07Rik	AI194952	RIKEN cDNA 2510009E07 gene	protein-coding
chr18	26784507	26784994	+	0	NA	Intergenic	Intergenic	-1030593	NM_001362334	108013	Mm.266435	NM_133195	ENSMUSG00000024268	Celf4	A230070D14Rik|BRUNOL-4|Brul4|Brunol4|C130060B05Rik	CUGBP, Elav-like family member 4	protein-coding
chr1	99582347	99582697	+	0	NA	Intergenic	Intergenic	-189879	NM_172851	241175	Mm.251301	NM_172851	ENSMUSG00000067028	Cntnap5b	C230078M14Rik|Caspr5-2	contactin associated protein-like 5B	protein-coding
chr18	90198558	90199017	+	0	NA	Intergenic	Intergenic	-311367	NM_198295	67988	Mm.268041	NM_198295	ENSMUSG00000024614	Tmx3	6430411B10Rik|A730024F05Rik|AV259382|Txndc10|mKIAA1830	thioredoxin-related transmembrane protein 3	protein-coding
chr12	36455972	36456758	+	0	NA	intron (NM_001364305, intron 3 of 9)	L1MCa|LINE|L1	40749	NR_037309	100499526		NR_037309	ENSMUSG00000092917	Mir3472	mmu-mir-3472	microRNA 3472	ncRNA
chr12	112143126	112143510	+	0	NA	Intergenic	Intergenic	-2890	NM_001097621	668303	Mm.313104	NM_001097621	ENSMUSG00000021294	Kif26a	mKIAA1236	kinesin family member 26A	protein-coding
chr5	70842018	70842623	+	0	NA	5' UTR (NM_010252, exon 1 of 9)	5' UTR (NM_010252, exon 1 of 9)	297	NM_010252	14405	Mm.255292	NM_010252	ENSMUSG00000001260	Gabrg1	GabaA|GabaA/BZ	gamma-aminobutyric acid (GABA) A receptor, subunit gamma 1	protein-coding
chr2	32852102	32852703	+	0	NA	Intergenic	Intergenic	-5165	NM_001113569	20910	Mm.278865	NM_009295	ENSMUSG00000026797	Stxbp1	AI317162|AI326233|MMS10-G|Ms10g|Munc-18a|Munc18-1|N-sec1|Rb-sec1|Sxtbp1|Unc18-1|Unc18h|nsec1	syntaxin binding protein 1	protein-coding
chr13	43637825	43638236	+	0	NA	intron (NM_183204, intron 1 of 1)	L1ME3A|LINE|L1	22233	NM_183204	328234	Mm.40588	NM_183204	ENSMUSG00000044164	Rnf182	C630023L15Rik	ring finger protein 182	protein-coding
chr5	88160669	88161014	+	0	NA	Intergenic	Intergenic	74285	NM_001252679	20600	Mm.1397	NM_021289	ENSMUSG00000029281	Smr2	MSG2|Vcs2	submaxillary gland androgen regulated protein 2	protein-coding
chr5	116860731	116861113	+	0	NA	Intergenic	Intergenic	255071	NM_178622	71954	Mm.34456	NM_178622	ENSMUSG00000066900	Suds3	2400003N08Rik|2410008L21Rik|AU067672|mSds3	suppressor of defective silencing 3 homolog (S. cerevisiae)	protein-coding
chr14	115005695	115006408	+	0	NA	Intergenic	Intergenic	-37620	NR_029785	723905		NR_029785	ENSMUSG00000065508	Mir17	Mirn17|mir-17|mmu-mir-17	microRNA 17	ncRNA
chr16	9711167	9711829	+	0	NA	intron (NM_008170, intron 4 of 13)	intron (NM_008170, intron 4 of 13)	284315	NM_008170	14811	Mm.2953	NM_008170	ENSMUSG00000059003	Grin2a	GluN2A|GluRepsilon1|NMDAR2A|NR2A	glutamate receptor, ionotropic, NMDA2A (epsilon 1)	protein-coding
chr5	35822674	35823200	+	0	NA	intron (NM_177678, intron 6 of 19)	intron (NM_177678, intron 6 of 19)	65057	NM_001177700	231148	Mm.254446	NM_177678	ENSMUSG00000029095	Ablim2	AI606905|C230091L11	actin-binding LIM protein 2	protein-coding
chr15	97448518	97448963	+	0	NA	Intergenic	Intergenic	-201453	NM_001164563	105827	Mm.24005	NM_178114	ENSMUSG00000048218	Amigo2	AI415330|AMIGO-2|AW208913|Ali1	adhesion molecule with Ig like domain 2	protein-coding
chr5	124196563	124197442	+	0	NA	intron (NM_011256, intron 2 of 24)	intron (NM_011256, intron 2 of 24)	-9820	NM_001289472	19679	Mm.44261	NM_011256	ENSMUSG00000029406	Pitpnm2	NIR3|RDGBA2|Rdgb2|mKIAA1457	phosphatidylinositol transfer protein, membrane-associated 2	protein-coding
chr7	132074413	132074867	+	0	NA	intron (NM_018867, intron 6 of 13)	intron (NM_018867, intron 6 of 13)	80101	NM_018867	55987	Mm.471654	NM_018867	ENSMUSG00000030862	Cpxm2	4632435C11Rik|CPX-2|Cpx2	carboxypeptidase X 2 (M14 family)	protein-coding
chr2	164765739	164766219	+	0	NA	intron (NM_133763, intron 11 of 12)	intron (NM_133763, intron 11 of 12)	-3950	NM_026785	68612	Mm.89830	NM_026785	ENSMUSG00000001403	Ube2c	1110015A16Rik|D2Ertd695e	ubiquitin-conjugating enzyme E2C	protein-coding
chr10	100629667	100630528	+	0	NA	Intergenic	Intergenic	37711	NM_001081246	66605	Mm.72646	NM_001081246	ENSMUSG00000056912	1700017N19Rik	-	RIKEN cDNA 1700017N19 gene	protein-coding
chr4	137968093	137968602	+	0	NA	Intergenic	Intergenic	-25108	NM_001369131	230861	Mm.268903	NM_172703	ENSMUSG00000028760	Eif4g3	1500002J22Rik|4930523M17Rik|G1-419-52|Gm32394|eIF4GII|repro8	eukaryotic translation initiation factor 4 gamma, 3	protein-coding
chr11	102893013	102893417	+	0	NA	exon (NM_001131020, exon 6 of 8)	exon (NM_001131020, exon 6 of 8)	3985	NM_001131020	14580	Mm.1239	NM_010277	ENSMUSG00000020932	Gfap	AI836096	glial fibrillary acidic protein	protein-coding
chr7	126199759	126200911	+	0	NA	5' UTR (NM_001311143, exon 1 of 24)	5' UTR (NM_001311143, exon 1 of 24)	166	NM_001311143	74204	Mm.235663	NM_028816	ENSMUSG00000000131	Xpo6	2610005L19Rik|AL022631|C230091E20Rik|R75304|Ranbp20|exp6|mKIAA0370	exportin 6	protein-coding
chr12	45865916	45866356	+	0	NA	Intergenic	ORR1F|LTR|ERVL-MaLR	-791653	NM_144552	217517	Mm.285400	NM_144552	ENSMUSG00000046314	Stxbp6	BC024598|C85317	syntaxin binding protein 6 (amisyn)	protein-coding
chr11	86946653	86947009	+	0	NA	intron (NM_001005341, intron 2 of 4)	intron (NM_001005341, intron 2 of 4)	46931	NM_001005341	77864	Mm.191894	NM_001005341	ENSMUSG00000018427	Ypel2	6430570G24|E130113K08Rik	yippee like 2	protein-coding
chr6	107444266	107445041	+	0	NA	Intergenic	Intergenic	-85073	NM_008516	16979	Mm.428543	NM_008516	ENSMUSG00000034648	Lrrn1	2810047E21Rik|NLRR-1	leucine rich repeat protein 1, neuronal	protein-coding
chr5	39416510	39418024	+	0	NA	Intergenic	Intergenic	186307	NR_045416	75095	Mm.332354	NR_045416	ENSMUSG00000106741	4930513D17Rik	-	RIKEN cDNA 4930513D17 gene	ncRNA
chr11	98788803	98789143	+	0	NA	Intergenic	Intergenic	-6543	NM_001361931	74026	Mm.258352	NM_028722	ENSMUSG00000052915	Msl1	2810017F12Rik|4121402D02Rik|4930463F05Rik|AA682082|Msl-1	male specific lethal 1	protein-coding
chr12	82158387	82158896	+	0	NA	Intergenic	Intergenic	-11375	NM_001167983	217692	Mm.261333	NM_172579	ENSMUSG00000042700	Sipa1l1	4931426N11Rik|AW213287|Spar|mKIAA0440	signal-induced proliferation-associated 1 like 1	protein-coding
chr14	90720271	90721282	+	0	NA	Intergenic	Intergenic	593885	NR_045712	74967	Mm.390704	NR_045712	ENSMUSG00000115001	4930474H20Rik	-	RIKEN cDNA 4930474H20 gene	ncRNA
chr19	7056246	7057262	+	0	NA	promoter-TSS (NM_134147)	promoter-TSS (NM_134147)	-14	NM_134147	107227	Mm.439977	NM_134147	ENSMUSG00000036278	Macrod1	AI604841|AW743046|D930010J01Rik|Lrp16	MACRO domain containing 1	protein-coding
chr1	192806539	192807260	+	0	NA	Intergenic	Intergenic	28314	NR_155503	320952	Mm.100944	NR_155503		A730013G03Rik	-	RIKEN cDNA A730013G03 gene	ncRNA
chr7	101481875	101482317	+	0	NA	intron (NM_001008548, intron 3 of 30)	intron (NM_001008548, intron 3 of 30)	6720	NR_029791	387157		NR_029791	ENSMUSG00000065446	Mir139	Mirn139|mir-139|mmu-mir-139	microRNA 139	ncRNA
chr6	24969651	24970066	+	0	NA	Intergenic	Intergenic	-13733	NM_177013	319832	Mm.127446	NM_177013	ENSMUSG00000048022	Tmem229a	6332401O19Rik	transmembrane protein 229A	protein-coding
chr15	84210226	84211024	+	0	NA	exon (NM_178614, exon 13 of 15)	exon (NM_178614, exon 13 of 15)	18385	NM_178614	68653	Mm.290725	NM_178614	ENSMUSG00000022437	Samm50	1110030L07Rik	SAMM50 sorting and assembly machinery component	protein-coding
chr6	91683653	91684503	+	0	NA	promoter-TSS (NM_009320)	promoter-TSS (NM_009320)	11	NM_009320	21366	Mm.395650	NM_009320	ENSMUSG00000030096	Slc6a6	AA589629|C80501|Taut	solute carrier family 6 (neurotransmitter transporter, taurine), member 6	protein-coding
chr13	58358690	58359528	+	0	NA	Intergenic	CpG	-4162	NM_175214	75050	Mm.385742	NM_175214	ENSMUSG00000060176	Kif27	4930517I18Rik	kinesin family member 27	protein-coding
chr4	131920822	131922084	+	0	NA	promoter-TSS (NM_001201367)	promoter-TSS (NM_001201367)	-318	NM_001201367	623230	Mm.421179	NM_001201367	ENSMUSG00000070720	Tmem200b	EG623230	transmembrane protein 200B	protein-coding
chr9	113508676	113509604	+	0	NA	intron (NR_040760, intron 2 of 4)	intron (NR_040760, intron 2 of 4)	78012	NR_040760	102688	Mm.394901	NR_040760	ENSMUSG00000109890	AU023762	-	expressed sequence AU023762	ncRNA
chr11	75551629	75552533	+	0	NA	TTS (NR_039553)	TTS (NR_039553)	652	NR_039553	100628624		NR_039553	ENSMUSG00000093100	Mir3971	mmu-mir-3971|mu-mir-3971	microRNA 3971	ncRNA
chr15	79785192	79788339	+	0	NA	3' UTR (NM_030689, exon 5 of 5)	3' UTR (NM_030689, exon 5 of 5)	-12298	NM_017470	54152	Mm.288159	NM_017470	ENSMUSG00000022420	Dnal4	D15Ertd424e|Dnalc4	dynein, axonemal, light chain 4	protein-coding
chr1	144431301	144432139	+	0	NA	Intergenic	Intergenic	135947	NR_110891	624910	Mm.389199	NM_001290269	ENSMUSG00000098509	Rgs21	EG624910	regulator of G-protein signalling 21	protein-coding
chr15	80954926	80955376	+	0	NA	intron (NM_009634, intron 2 of 12)	intron (NM_009634, intron 2 of 12)	6661	NM_009634	11564	Mm.38151	NM_009634	ENSMUSG00000022407	Adsl	Adl|Asl	adenylosuccinate lyase	protein-coding
chr2	164745474	164746404	+	0	NA	promoter-TSS (NM_133763)	promoter-TSS (NM_133763)	-76	NM_133763	76233	Mm.440009	NM_133763	ENSMUSG00000017299	Dnttip1	6430706C13Rik	deoxynucleotidyltransferase, terminal, interacting protein 1	protein-coding
chr2	82715663	82716241	+	0	NA	Intergenic	Intergenic	-227682	NM_001370266	241516	Mm.302516	NM_001370266	ENSMUSG00000075249	Fsip2	-	fibrous sheath-interacting protein 2	protein-coding
chr12	111829358	111830148	+	0	NA	intron (NM_011625, intron 16 of 16)	intron (NM_011625, intron 16 of 16)	15583	NM_026752	68520	Mm.390497	NM_026752	ENSMUSG00000021286	Zfyve21	1110013H04Rik|AW558780|C85416	zinc finger, FYVE domain containing 21	protein-coding
chr5	116498780	116499595	+	0	NA	intron (NM_026886, intron 1 of 12)	intron (NM_026886, intron 1 of 12)	60465	NR_015595	76798	Mm.444322	NR_015595	ENSMUSG00000086219	Srrm4os	2410137F16Rik	serine/arginine repetitive matrix 4, opposite strand	ncRNA
chr1	74842999	74843370	+	0	NA	Intergenic	Lx8|LINE|L1	-7711	NR_151618	102634844	Mm.288703	NR_151618		Gm16582	-	predicted gene 16582	ncRNA
chr11	119528900	119529564	+	0	NA	Intergenic	Intergenic	18588	NM_008730	18164	Mm.5142	NM_008730	ENSMUSG00000025582	Nptx1	D11Bwg1004e|Np1	neuronal pentraxin 1	protein-coding
chr6	44073048	44073596	+	0	NA	Intergenic	Intergenic	-407044	NM_013861	29807	Mm.320979	NM_013861	ENSMUSG00000029735	Tpk1	-	thiamine pyrophosphokinase	protein-coding
chr5	117249872	117250166	+	0	NA	intron (NM_001081308, intron 13 of 19)	intron (NM_001081308, intron 13 of 19)	37545	NM_018858	23980	Mm.195898	NM_018858	ENSMUSG00000032959	Pebp1	HCNP|Pbp|Pbp1|Pbpr|Rkip	phosphatidylethanolamine binding protein 1	protein-coding
chr1	90968553	90968987	+	0	NA	intron (NM_008998, intron 1 of 5)	intron (NM_008998, intron 1 of 5)	850	NM_008998	19329	Mm.279780	NM_008998	ENSMUSG00000026304	Rab17	AW413472	RAB17, member RAS oncogene family	protein-coding
chr10	128337344	128338263	+	0	NA	promoter-TSS (NM_026444)	promoter-TSS (NM_026444)	76	NM_026444	12974	Mm.58836	NM_026444	ENSMUSG00000005683	Cs	2610511A05Rik|9030605P22Rik|Ahl4|BB234005|Cis	citrate synthase	protein-coding
chr4	96696579	96697385	+	0	NA	Intergenic	L3|LINE|CR1	-32863	NM_010007	13109	Mm.12838	NM_010007	ENSMUSG00000052520	Cyp2j5	-	cytochrome P450, family 2, subfamily j, polypeptide 5	protein-coding
chr11	84048420	84049076	+	0	NA	exon (NM_019819, exon 3 of 3)	exon (NM_019819, exon 3 of 3)	19609	NM_019819	56405	Mm.240885	NM_019819	ENSMUSG00000018648	Dusp14	1110014C10Rik|2310042C07Rik|D11Ertd395e|MKP-L|Mkp6	dual specificity phosphatase 14	protein-coding
chr4	149075858	149076636	+	0	NA	intron (NM_019781, intron 1 of 8)	intron (NM_019781, intron 1 of 8)	23596	NM_019781	56273	Mm.184172	NM_019781	ENSMUSG00000028975	Pex14	Pex14p|R75137	peroxisomal biogenesis factor 14	protein-coding
chr1	146642191	146642703	+	0	NA	intron (NM_001357572, intron 3 of 8)	intron (NM_001357572, intron 3 of 8)	144760	NM_001357572	215378	Mm.441817	NM_153539	ENSMUSG00000035131	Brinp3	B830045N13Rik|Fam5c	bone morphogenetic protein/retinoic acid inducible neural specific 3	protein-coding
chr19	7278164	7278884	+	0	NA	intron (NM_001080388, intron 15 of 16)	intron (NM_001080388, intron 15 of 16)	10245	NM_001320554	104383	Mm.283859	NM_054048	ENSMUSG00000024968	Rcor2	1A13|AW122124|CoREST|Rcor|Rcor1	REST corepressor 2	protein-coding
chr15	74764326	74764744	+	0	NA	promoter-TSS (NM_010742)	promoter-TSS (NM_010742)	-968	NM_010742	17068	Mm.878	NM_010742	ENSMUSG00000034634	Ly6d	Ly-61|Ly61|Thb	lymphocyte antigen 6 complex, locus D	protein-coding
chr9	46922164	46922394	+	0	NA	intron (NR_015605, intron 2 of 3)	intron (NR_015605, intron 2 of 3)	8676	NR_015605	73040	Mm.265384	NR_015605	ENSMUSG00000099696	2900052N01Rik	AU067665	RIKEN cDNA 2900052N01 gene	ncRNA
chr7	100927600	100927936	+	0	NA	intron (NM_001081116, intron 1 of 20)	intron (NM_001081116, intron 1 of 20)	4393	NM_001081116	207212	Mm.29954	NM_001081116	ENSMUSG00000032875	Arhgef17	8030463K16|AI428794|AW558066|BC035332|mKIAA0337	Rho guanine nucleotide exchange factor (GEF) 17	protein-coding
chr5	113643190	113643793	+	0	NA	intron (NM_001359060, intron 1 of 4)	intron (NM_001359060, intron 1 of 4)	112	NM_001359060	14747	Mm.5196	NM_008153	ENSMUSG00000042190	Cmklr1	ChemR23|DEZ|Gpcr27|mcmklr1	chemokine-like receptor 1	protein-coding
chrX	139479975	139480692	+	0	NA	promoter-TSS (NM_001346522)	promoter-TSS (NM_001346522)	-34	NM_001358686	102871	Mm.26565	NM_175326	ENSMUSG00000042498	Radx	AI132325|D330045A20Rik	RPA1 related single stranded DNA binding protein, X-linked	protein-coding
chr5	131833418	131834036	+	0	NA	intron (NM_001363480, intron 4 of 19)	MER58C|DNA|hAT-Charlie	-46542	NR_040704	75369	Mm.389696	NR_040704	ENSMUSG00000105773	4930563F08Rik	-	RIKEN cDNA 4930563F08 gene	ncRNA
chr17	77140941	77141368	+	0	NA	Intergenic	RMER4B|LTR|ERVK	-1059094	NM_015800	50766	Mm.311912	NM_015800	ENSMUSG00000024074	Crim1	AU015004	cysteine rich transmembrane BMP regulator 1 (chordin like)	protein-coding
chr5	122068554	122069245	+	0	NA	Intergenic	Intergenic	-19048	NM_001312908	13048	Mm.156172	NM_007804	ENSMUSG00000042589	Cux2	1700051K22Rik|Cutl2|Cux-2	cut-like homeobox 2	protein-coding
chrX	139665426	139665851	+	0	NA	intron (NM_001254761, intron 6 of 6)	intron (NM_001254761, intron 6 of 6)	-19358	NM_001081499	245638	Mm.275869	NM_001081499	ENSMUSG00000042473	Tbc1d8b	4921505D17Rik|9030605E16Rik	TBC1 domain family, member 8B	protein-coding
chr8	48927419	48928052	+	0	NA	Intergenic	Intergenic	-253045	NM_001145937	23965	Mm.42191	NM_011857	ENSMUSG00000031561	Tenm3	2610100B16Rik|Odz1|Odz3|Ten-m3|mKIAA1455	teneurin transmembrane protein 3	protein-coding
chr1	143503349	143504071	+	0	NA	Intergenic	Intergenic	-136987	NM_020025	26878	Mm.285580	NM_020025	ENSMUSG00000033849	B3galt2	-	UDP-Gal:betaGlcNAc beta 1,3-galactosyltransferase, polypeptide 2	protein-coding
chr1	135005722	135006130	+	0	NA	intron (NM_001033409, intron 6 of 17)	intron (NM_001033409, intron 6 of 17)	43361	NM_001278115	67196	Mm.284587	NM_026024	ENSMUSG00000026429	Ube2t	2700084L22Rik|C80607	ubiquitin-conjugating enzyme E2T	protein-coding
chr11	4946674	4948198	+	0	NA	promoter-TSS (NM_001243043)	promoter-TSS (NM_001243043)	-85	NM_001243043	11764	Mm.274816	NM_007454	ENSMUSG00000009090	Ap1b1	Adtb1|b2b1660Clo	adaptor protein complex AP-1, beta 1 subunit	protein-coding
chr9	29217993	29218348	+	0	NA	intron (NM_001357597, intron 2 of 8)	intron (NM_001357597, intron 2 of 8)	194515	NM_001357602	235106	Mm.283138	NM_172290	ENSMUSG00000059974	Ntm	6230410L23Rik|B230210G24Rik|Hnt|Igdcc2|R75390	neurotrimin	protein-coding
chr13	15582218	15582875	+	0	NA	intron (NM_008130, intron 3 of 14)	intron (NM_008130, intron 3 of 14)	118823	NM_008130	14634	Mm.5098	NM_008130	ENSMUSG00000021318	Gli3	AI854843|AU023367|Bph|GLI3-190|GLI3FL|Pdn|Xt|add	GLI-Kruppel family member GLI3	protein-coding
chr5	89639520	89640017	+	0	NA	Intergenic	RLTR13D1|LTR|ERVK	23332	NR_037571	631105	Mm.7732	NR_037571		Gm7056	Gm149	predicted gene 7056	ncRNA
chrX	44322847	44323309	+	0	NA	Intergenic	Intergenic	45259	NM_175539	245403	Mm.55270	NM_175539	ENSMUSG00000050926	Dcaf12l2	A130007F10Rik|Wdr40c	DDB1 and CUL4 associated factor 12-like 2	protein-coding
chr2	78173077	78173415	+	0	NA	intron (NR_108098, intron 2 of 6)	intron (NR_108098, intron 2 of 6)	-64301	NM_177843	329436	Mm.235448	NM_177843		Gm14461	A830093M07	predicted gene 14461	protein-coding
chr7	122251594	122252172	+	0	NA	Intergenic	Intergenic	32387	NM_027363	70261	Mm.96997	NM_027363	ENSMUSG00000030865	Chp2	2010110P09Rik|Cbhp2	calcineurin-like EF hand protein 2	protein-coding
chr9	121345562	121346041	+	0	NA	intron (NM_001357972, intron 1 of 13)	intron (NM_001357972, intron 1 of 13)	-21157	NM_175114	67095	Mm.491112	NM_175114	ENSMUSG00000032536	Trak1	2310001H13Rik|AI413908|AI467545|hyrt|mKIAA1042	trafficking protein, kinesin binding 1	protein-coding
chr13	16325637	16325956	+	0	NA	Intergenic	Intergenic	-302373	NR_155430	100503142	Mm.359204	NR_155430		B230303A05Rik	B230303A05|EG328191	U1 small nuclear ribonucleoprotein 1C pseudogene	pseudo
chr8	61144867	61145313	+	0	NA	Intergenic	L1MA6|LINE|L1	-79081	NM_021506	59009	Mm.27949	NM_021506	ENSMUSG00000031642	Sh3rf1	2200003J05Rik|Posh|R75531|Sh3md2	SH3 domain containing ring finger 1	protein-coding
chr15	99248876	99249617	+	0	NA	intron (NM_001164156, intron 3 of 13)	intron (NM_001164156, intron 3 of 13)	-2542	NR_045627	73600	Mm.475134	NR_045627	ENSMUSG00000100599	1700120C14Rik	-	RIKEN cDNA 1700120C14 gene	ncRNA
chr4	148590828	148592132	+	0	NA	promoter-TSS (NM_009272)	promoter-TSS (NM_009272)	-33	NM_009272	20810	Mm.10	NM_009272	ENSMUSG00000006442	Srm	AA407669|SpdST|SpdSy	spermidine synthase	protein-coding
chr5	14238541	14239187	+	0	NA	intron (NM_011348, intron 14 of 16)	intron (NM_011348, intron 14 of 16)	213588	NM_011348	20349	Mm.134093	NM_011348	ENSMUSG00000063531	Sema3e	6430702L12|AA408817|Semah|mKIAA0331	sema domain, immunoglobulin domain (Ig), short basic domain, secreted, (semaphorin) 3E	protein-coding
chr9	112234513	112236203	+	0	NA	promoter-TSS (NM_001362016)	promoter-TSS (NM_001362016)	-517	NM_001362019	74100	Mm.297444	NM_028755	ENSMUSG00000032503	Arpp21	0710001E13Rik|AI853636|ARPP-21|D9Bwg1012e|R3hdm3|Tarpp	cyclic AMP-regulated phosphoprotein, 21	protein-coding
chr14	63714501	63715098	+	0	NA	intron (NM_173393, intron 1 of 2)	intron (NM_173393, intron 1 of 2)	-12390	NR_030611	100124452		NR_030611	ENSMUSG00000076049	Mir598	Mirn598|mir-598|mmu-mir-598	microRNA 598	ncRNA
chr2	180154654	180155340	+	0	NA	intron (NM_144500, intron 10 of 13)	intron (NM_144500, intron 10 of 13)	-16591	NM_019822	56436	Mm.316654	NM_019822	ENSMUSG00000039041	Adrm1	1110063P18Rik|2510006J17Rik|AA408205|ARM-1|AU043535|Arm1|Gp110|Rpn13	adhesion regulating molecule 1	protein-coding
chr11	78205727	78206493	+	0	NA	TTS (NM_009297)	TTS (NM_009297)	11408	NM_001368876	216974	Mm.50974	NM_001045516	ENSMUSG00000044122	Proca1	4933404M19Rik	protein interacting with cyclin A1	protein-coding
chr10	24634241	24634783	+	0	NA	Intergenic	Intergenic	-38709	NR_163910
chr16	33318162	33319755	+	0	NA	Intergenic	Intergenic	61778	NR_045709	100502742	Mm.217880	NR_045709	ENSMUSG00000097318	1700007L15Rik	linc-Iqcg|linc1609	RIKEN cDNA 1700007L15 gene	ncRNA
chr11	52648251	52649335	+	0	NA	Intergenic	Intergenic	-115913	NM_177059	320027	Mm.44518	NM_177059	ENSMUSG00000036264	Fstl4	B230374F23Rik|SPIG1|mKIAA1061	follistatin-like 4	protein-coding
chr3	73566538	73566976	+	0	NA	intron (NR_040557, intron 4 of 4)	MTEa|LTR|ERVL-MaLR	-85106	NR_040547	74693	Mm.292227	NR_040547	ENSMUSG00000102362	4930509J09Rik	-	RIKEN cDNA 4930509J09 gene	ncRNA
chr5	111408476	111409089	+	0	NA	Intergenic	Intergenic	-8518	NM_001081235	433938	Mm.332576	NM_001081235	ENSMUSG00000070576	Mn1	AA003644|AA009236	meningioma 1	protein-coding
chr1	9967962	9968463	+	0	NA	promoter-TSS (NM_001285425)	promoter-TSS (NM_001285425)	-402	NM_001285425	100039596	Mm.412928	NM_001285425	ENSMUSG00000099032	Tcf24	Gm10567|Gm2330	transcription factor 24	protein-coding
chr2	155624634	155624939	+	0	NA	intron (NM_001085378, intron 21 of 41)	B3A|SINE|B2	1906	NR_030757	735275		NR_030757	ENSMUSG00000076312	Mir499	Mirn499|mir-499|mmu-mir-499	microRNA 499	ncRNA
chr11	74925441	74926507	+	0	NA	promoter-TSS (NM_001362743)	promoter-TSS (NM_001362743)	-26	NM_001163311	27364	Mm.131443	NM_013761	ENSMUSG00000001323	Srr	M100034|Rgsc34|Srs	serine racemase	protein-coding
chr4	138495859	138496287	+	0	NA	Intergenic	Intergenic	40925	NM_025451	66259	Mm.41603	NM_025451	ENSMUSG00000046447	Camk2n1	1810006K23Rik|AI848599|AI891706	calcium/calmodulin-dependent protein kinase II inhibitor 1	protein-coding
chr17	24649507	24650434	+	0	NA	exon (NM_023055, exon 1 of 7)	exon (NM_023055, exon 1 of 7)	335	NM_001357796	65962	Mm.21587	NM_023055	ENSMUSG00000002504	Slc9a3r2	0610011L07Rik|1200011K07Rik|2010007A20Rik|E3karp|NHERF-2|Nherf2|Octs2|Sip-1|Sip1|Sryip1|Tka-1	solute carrier family 9 (sodium/hydrogen exchanger), member 3 regulator 2	protein-coding
chr13	59110015	59110691	+	0	NA	intron (NM_001025074, intron 16 of 17)	intron (NM_001025074, intron 16 of 17)	302656	NM_001025074	18212	Mm.130054	NM_008745	ENSMUSG00000055254	Ntrk2	GP145-TrkB/GP95-TrkB|Tkrb|trk-B|trkB	neurotrophic tyrosine kinase, receptor, type 2	protein-coding
chr9	45458293	45459368	+	0	NA	intron (NM_001081270, intron 3 of 32)	intron (NM_001081270, intron 3 of 32)	-27598	NR_040732	74602	Mm.394117	NR_040732	ENSMUSG00000097074	4833428L15Rik	-	RIKEN cDNA 4833428L15 gene	ncRNA
chr2	27006194	27006971	+	0	NA	intron (NM_001290463, intron 26 of 28)	intron (NM_001290463, intron 26 of 28)	-3344	NM_001243240	381356	Mm.150270	NM_029862	ENSMUSG00000015488	Cacfd1	5930434B04Rik|mFwe	calcium channel flower domain containing 1	protein-coding
chr6	70774099	70774892	+	0	NA	intron (NM_009075, intron 5 of 8)	intron (NM_009075, intron 5 of 8)	17680	NM_009075	19895	Mm.17905	NM_009075	ENSMUSG00000053604	Rpia	RPI	ribose 5-phosphate isomerase A	protein-coding
chr15	77269535	77269921	+	0	NA	intron (NM_175387, intron 1 of 12)	Lx5b|LINE|L1	-24120	NM_001358772	93686	Mm.202774	NM_053104	ENSMUSG00000033565	Rbfox2	Fbm2|Fxh|Hrnbp2|Rbm9	RNA binding protein, fox-1 homolog (C. elegans) 2	protein-coding
chr11	106272281	106273459	+	0	NA	5' UTR (NM_001130187, exon 1 of 13)	5' UTR (NM_001130187, exon 1 of 13)	102	NM_001130187	83796	Mm.21772	NM_031878	ENSMUSG00000078619	Smarcd2	AW322457|Baf60b	SWI/SNF related, matrix associated, actin dependent regulator of chromatin, subfamily d, member 2	protein-coding
chr16	52513545	52514350	+	0	NA	Intergenic	Intergenic	-60866	NM_009655	11658	Mm.288282	NM_009655	ENSMUSG00000022636	Alcam	AI853494|BEN|CD166|DM-GRASP|MuSC|SC1	activated leukocyte cell adhesion molecule	protein-coding
chr17	46282559	46283408	+	0	NA	promoter-TSS (NM_028751)	promoter-TSS (NM_028751)	43	NM_028751	74094	Mm.284594	NM_028751	ENSMUSG00000012296	Tjap1	0610041D19Rik|AI415281|AW121008|Pilt|Tjp4	tight junction associated protein 1	protein-coding
chr19	41606268	41606947	+	0	NA	intron (NM_015748, intron 31 of 36)	intron (NM_015748, intron 31 of 36)	17956	NR_106166	102465884		NR_106166	ENSMUSG00000098286	Mir8091	Gm27575|mmu-mir-8091	microRNA 8091	ncRNA
chr2	115592568	115593358	+	0	NA	intron (NM_207264, intron 1 of 10)	MER102b|DNA|hAT-Charlie	11247	NM_207264	399568	Mm.134929	NM_207264	ENSMUSG00000040282	BC052040	-	cDNA sequence BC052040	protein-coding
chr4	150450169	150450757	+	0	NA	intron (NM_001085492, intron 4 of 22)	intron (NM_001085492, intron 4 of 22)	168547	NM_001085492	68703	Mm.291274	NM_001085492	ENSMUSG00000039852	Rere	1110033A15Rik|AI414665|ARG|ARP|ATN1L|AW742570|Atr2|DNB1|eye<m03Jus>|eyes3|mKIAA0458	arginine glutamic acid dipeptide (RE) repeats	protein-coding
chr6	56533644	56534124	+	0	NA	Intergenic	Intergenic	-164250	NM_001159956	18575	Mm.5145	NM_011054	ENSMUSG00000004347	Pde1c	-	phosphodiesterase 1C	protein-coding
chr4	130783033	130783614	+	0	NA	Intergenic	Intergenic	-9214	NM_011520	20970	Mm.206536	NM_011520	ENSMUSG00000025743	Sdc3	Synd3|mKIAA0468|syn-3	syndecan 3	protein-coding
chr12	112623603	112624248	+	0	NA	intron (NM_007421, intron 1 of 12)	intron (NM_007421, intron 1 of 12)	3878	NM_007421	11565	Mm.3440	NM_007421	ENSMUSG00000011148	Adssl1	AI528595|Adss|Adss1	adenylosuccinate synthetase like 1	protein-coding
chr5	130144182	130145238	+	0	NA	promoter-TSS (NM_172509)	promoter-TSS (NM_172509)	-173	NM_172509	212919	Mm.55812	NM_172509	ENSMUSG00000034110	Kctd7	4932409E18|9430010P06Rik	potassium channel tetramerisation domain containing 7	protein-coding
chr11	61436163	61436533	+	0	NA	Intergenic	Intergenic	17644	NM_009548	22671	Mm.89201	NM_009548	ENSMUSG00000010086	Rnf112	ZNF179|Zfp179|bfp|neurolastin	ring finger protein 112	protein-coding
chr4	151640826	151641544	+	0	NA	intron (NM_001081557, intron 3 of 23)	intron (NM_001081557, intron 3 of 23)	220583	NM_001081557	100072	Mm.318846	NM_001081557	ENSMUSG00000014592	Camta1	1810059M14Rik|2310058O09Rik|AI316882|AW987475|mKIAA0833	calmodulin binding transcription activator 1	protein-coding
chr2	168741095	168742562	+	0	NA	promoter-TSS (NM_015731)	promoter-TSS (NM_015731)	-28	NM_015731	11981	Mm.330819	NM_015731	ENSMUSG00000027546	Atp9a	IIa	ATPase, class II, type 9A	protein-coding
chr14	19663745	19664293	+	0	NA	Intergenic	Intergenic	-61432	NM_001024706	432825	Mm.327147	NM_001024706	ENSMUSG00000095024	Gm5458	EG432825	predicted gene 5458	protein-coding
chr12	45977795	45978478	+	0	NA	Intergenic	Intergenic	840631	NM_001364638	664883	Mm.247195	NM_021361	ENSMUSG00000021047	Nova1	9430099M15Rik|G630039L02|Nova-1	neuro-oncological ventral antigen 1	protein-coding
chr9	64385463	64386325	+	0	NA	intron (NM_172522, intron 1 of 22)	CpG	268	NM_001134399	214058	Mm.127721	NM_172522	ENSMUSG00000036466	Megf11	2410080H04Rik|D130061K05	multiple EGF-like-domains 11	protein-coding
chr16	78950070	78950655	+	0	NA	exon (NM_139134, exon 6 of 6)	exon (NM_139134, exon 6 of 6)	19414	NM_001362555	246048	Mm.77895	NM_139134	ENSMUSG00000022860	Chodl	3110074E07Rik|MT75|PRED12	chondrolectin	protein-coding
chr13	55386898	55387246	+	0	NA	Intergenic	Intergenic	-12576	NM_011392	20505	Mm.276355	NM_011392	ENSMUSG00000021490	Slc34a1	NaPi-IIa|Npt2|Npt2a|Slc17a2	solute carrier family 34 (sodium phosphate), member 1	protein-coding
chr11	119211704	119212048	+	0	NA	intron (NM_001347625, intron 1 of 11)	MARNA|DNA|TcMar-Mariner	16623	NM_172443	207592	Mm.205263	NM_172443	ENSMUSG00000039976	Tbc1d16	B930087K01|BC026530|Tcd1d16	TBC1 domain family, member 16	protein-coding
chr13	14656371	14656872	+	0	NA	Intergenic	Intergenic	26363	NM_134067	105351	Mm.41450	NM_134067	ENSMUSG00000039182	AW209491	-	expressed sequence AW209491	protein-coding
chr3	149544946	149545687	+	0	NA	Intergenic	Intergenic	270579	NR_040591	381482	Mm.393866	NR_040591		Gm1653	-	predicted gene 1653	ncRNA
chr15	18079437	18080225	+	0	NA	intron (NR_045711, intron 11 of 11)	intron (NR_045711, intron 11 of 11)	289796	NR_045711	70886	Mm.399021	NR_045711	ENSMUSG00000098150	4921515E04Rik	-	RIKEN cDNA 4921515E04 gene	ncRNA
chr7	99562224	99562908	+	0	NA	intron (NM_178220, intron 1 of 14)	intron (NM_178220, intron 1 of 14)	10297	NR_029760	723840		NR_029760	ENSMUSG00000065571	Mir326	Mirn326|mir-326|mmu-mir-326	microRNA 326	ncRNA
chr3	89321694	89323274	+	0	NA	intron (NM_010108, intron 1 of 4)	intron (NM_010108, intron 1 of 4)	395	NM_010108	13638	Mm.331159	NM_010108	ENSMUSG00000028039	Efna3	AW494418|EFL-2|Ehk1-L|Epl3|LERK-3	ephrin A3	protein-coding
chr8	120382209	120383480	+	0	NA	Intergenic	Intergenic	-106022	NM_198671	382034	Mm.334856	NM_198671	ENSMUSG00000031822	Gse1	2210013I18Rik|mKIAA0182	genetic suppressor element 1, coiled-coil protein	protein-coding
chr2	26964083	26964832	+	0	NA	promoter-TSS (NM_001362876)	promoter-TSS (NM_001362876)	-71	NM_207234	227656	Mm.291874	NM_207234	ENSMUSG00000052406	Rexo4	Gm111|Rex4|Xpmc2h	REX4, 3'-5' exonuclease	protein-coding
chr5	129071887	129072495	+	0	NA	Intergenic	Intergenic	-24559	NM_001081342	243277	Mm.440501	NM_177734	ENSMUSG00000044017	Adgrd1	E230012M21Rik|Gpr133	adhesion G protein-coupled receptor D1	protein-coding
chr17	25053091	25053630	+	0	NA	intron (NM_134126, intron 17 of 29)	intron (NM_134126, intron 17 of 29)	27754	NM_001001183	407831	Mm.34379	NM_001001183	ENSMUSG00000024168	Tmem204	-	transmembrane protein 204	protein-coding
chr17	46030580	46031712	+	0	NA	intron (NM_001025250, intron 1 of 7)	CpG	1231	NM_009505	22339	Mm.282184	NM_009505	ENSMUSG00000023951	Vegfa	Vegf|Vpf	vascular endothelial growth factor A	protein-coding
chr7	79496051	79496440	+	0	NA	Intergenic	CpG	-3781	NR_040311	101694	Mm.41661	NR_040311	ENSMUSG00000097023	Mir9-3hg	AI854517	Mir9-3 host gene	ncRNA
chr16	49766409	49766712	+	0	NA	Intergenic	L1MC4|LINE|L1	67266	NM_028680	73916	Mm.241276	NM_028680	ENSMUSG00000032965	Ift57	4833420A15Rik|Esrrbl1|Hippi|MHS4R2	intraflagellar transport 57	protein-coding
chr10	51669110	51669605	+	0	NA	Intergenic	Intergenic	-8403	NM_001159389	320995	Mm.109190	NM_177306	ENSMUSG00000019900	Rfx6	4930572O07Rik|Rfxdc1	regulatory factor X, 6	protein-coding
chr5	149207556	149208248	+	0	NA	intron (NM_001013378, intron 7 of 9)	intron (NM_001013378, intron 7 of 9)	23342	NM_001115153	231915	Mm.29402	NM_001013378	ENSMUSG00000041264	Uspl1	E430026A01Rik	ubiquitin specific peptidase like 1	protein-coding
chr8	123816622	123817392	+	0	NA	intron (NM_009003, intron 1 of 7)	intron (NM_009003, intron 1 of 7)	11011	NM_009003	19341	Mm.9221	NM_009003	ENSMUSG00000019478	Rab4a	AI848268|Rab4	RAB4A, member RAS oncogene family	protein-coding
chr2	39467463	39468352	+	0	NA	Intergenic	Intergenic	-241558	NM_024209	67857	Mm.389242	NM_024209	ENSMUSG00000026753	Ppp6c	2310003C10Rik|Pp6C	protein phosphatase 6, catalytic subunit	protein-coding
chr2	8023331	8023728	+	0	NA	Intergenic	B4|SINE|B4	-627331	NM_001110231	14007	Mm.398543	NM_010160	ENSMUSG00000002107	Celf2	B230218O03|B230345P09Rik|C88023|CELF-2|CUG-BP2|Cugbp2|D230046B21Rik|Etr-3|Napor|Napor-2|mETR-3	CUGBP, Elav-like family member 2	protein-coding
chr1	11321193	11321755	+	0	NA	Intergenic	Intergenic	57511	NM_001033636	109294	Mm.123247	NM_029525	ENSMUSG00000048960	Prex2	6230420N16Rik|AI316880|AI553603|C030045D06Rik|D430013K02|Depdc2|P-Rex2	phosphatidylinositol-3,4,5-trisphosphate-dependent Rac exchange factor 2	protein-coding
chr4	152202729	152203596	+	0	NA	intron (NM_001146058, intron 1 of 8)	intron (NM_001146058, intron 1 of 8)	3318	NM_001146058	70025	Mm.296191	NM_133348	ENSMUSG00000028937	Acot7	2410041A17Rik|Ach1|Act|Bach|CTE-IIa|Cte-II|Lach1	acyl-CoA thioesterase 7	protein-coding
chr8	122954398	122954682	+	0	NA	intron (NM_001081379, intron 2 of 12)	intron (NM_001081379, intron 2 of 12)	87744	NM_001081379	77087	Mm.31567	NM_001081379	ENSMUSG00000035569	Ankrd11	2410104C19Rik|3010027A04Rik|6330578C09Rik|9530048I21Rik|AA930108|Gm176|Yod	ankyrin repeat domain 11	protein-coding
chr13	88026258	88027420	+	0	NA	Intergenic	MMERVK9E_I-int|LTR|ERVK	-794633	NM_010103	13612	Mm.125580	NM_010103	ENSMUSG00000034488	Edil3	Del-1|Del1|Sox2-cre|Sox2Cre|Tg(Sox2-cre)1Amc	EGF-like repeats and discoidin I-like domains 3	protein-coding
chr3	132269535	132270089	+	0	NA	Intergenic	Intergenic	184520	NM_020265	56811	Mm.103593	NM_020265	ENSMUSG00000028031	Dkk2	-	dickkopf WNT signaling pathway inhibitor 2	protein-coding
chr1	173300757	173301202	+	0	NA	Intergenic	L1MCa|LINE|L1	-23223	NM_001205011	100504232	Mm.482546	NM_001205011	ENSMUSG00000079180	Mptx2	Gm11062	mucosal pentraxin 2	protein-coding
chr9	58175641	58176677	+	0	NA	Intergenic	Intergenic	-16938	NM_012043	26968	Mm.367887	NM_012043	ENSMUSG00000037206	Islr	AW553146|Meflin	immunoglobulin superfamily containing leucine-rich repeat	protein-coding
chr5	135822208	135822782	+	0	NA	intron (NM_021403, intron 1 of 14)	intron (NM_021403, intron 1 of 14)	4389	NM_021403	58212	Mm.271230	NM_021403	ENSMUSG00000039860	Srrm3	2900083I11Rik|AB041661|SRm300-like|Srrm2l	serine/arginine repetitive matrix 3	protein-coding
chr5	135161170	135161916	+	0	NA	3' UTR (NM_013763, exon 7 of 7)	3' UTR (NM_013763, exon 7 of 7)	-6829	NM_009745	12054	Mm.405834	NM_009745	ENSMUSG00000029681	Bcl7b	-	B cell CLL/lymphoma 7B	protein-coding
chr1	10874689	10875059	+	0	NA	Intergenic	Intergenic	-9000	NR_030645	100124448		NR_030645	ENSMUSG00000076948	Mir467e	Mirn467e	microRNA 467e	ncRNA
chr6	14757187	14758029	+	0	NA	Intergenic	Intergenic	-2334	NM_080464	140491	Mm.209429	NM_080464	ENSMUSG00000042717	Ppp1r3a	GM|RG1|RGL	protein phosphatase 1, regulatory subunit 3A	protein-coding
chr4	155317070	155317661	+	0	NA	intron (NM_008860, intron 4 of 17)	intron (NM_008860, intron 4 of 17)	27384	NM_001355178	18762	Mm.28561	NM_008860	ENSMUSG00000029053	Prkcz	AI098070|C80388|Pkcz|R74924|aPKCzeta|nPKC-zeta|zetaPKC	protein kinase C, zeta	protein-coding
chr9	65404308	65404939	+	0	NA	intron (NM_001033158, intron 2 of 4)	intron (NM_001033158, intron 2 of 4)	6135	NM_001162923	70784	Mm.35827	NM_001033158	ENSMUSG00000041696	Rasl12	4631404I11Rik	RAS-like, family 12	protein-coding
chr11	37905041	37905463	+	0	NA	Intergenic	ORR1D2-int|LTR|ERVL-MaLR	246263	NR_131154	100039148	Mm.120467	NR_131154	ENSMUSG00000087388	Gm12128	-	predicted gene 12128	ncRNA
chr15	78374107	78374654	+	0	NA	Intergenic	Intergenic	14389	NM_001163613	73376	Mm.73222	NM_028522	ENSMUSG00000062154	Tex33	1700061J05Rik|Ean57	testis expressed 33	protein-coding
chr11	97713794	97714172	+	0	NA	TTS (NM_011971)	TTS (NM_011971)	10549	NM_011971	26446	Mm.21874	NM_011971	ENSMUSG00000069744	Psmb3	AL033320|C10-II	proteasome (prosome, macropain) subunit, beta type 3	protein-coding
chrX	107369622	107370335	+	0	NA	Intergenic	Intergenic	33382	NM_008409	16431	Mm.193	NM_008409	ENSMUSG00000031239	Itm2a	AW108051|Bricd2a|E25|Itm2	integral membrane protein 2A	protein-coding
chr5	129545734	129546176	+	0	NA	intron (NM_172276, intron 11 of 17)	intron (NM_172276, intron 11 of 17)	-38214	NM_011846	23948	Mm.42047	NM_011846	ENSMUSG00000029436	Mmp17	MT4-MMP|MT4MMP|MTMMP4	matrix metallopeptidase 17	protein-coding
chr9	113499317	113499698	+	0	NA	intron (NR_040760, intron 3 of 4)	intron (NR_040760, intron 3 of 4)	87645	NR_040760	102688	Mm.394901	NR_040760	ENSMUSG00000109890	AU023762	-	expressed sequence AU023762	ncRNA
chr4	125938405	125938775	+	0	NA	Intergenic	Intergenic	-16187	NR_015560	72395	Mm.112888	NR_015560	ENSMUSG00000085562	2610028E06Rik	BB043107	RIKEN cDNA 2610028E06 gene	ncRNA
chr14	44730390	44731692	+	0	NA	Intergenic	Intergenic	-6054	NM_001162954	666744	Mm.387002	NM_001162954	ENSMUSG00000091923	Gm8267	EG666744	predicted gene 8267	protein-coding
chr11	16525026	16525438	+	0	NA	Intergenic	Intergenic	-16748	NM_001109972	20335	Mm.325350	NM_011343	ENSMUSG00000078974	Sec61g	-	SEC61, gamma subunit	protein-coding
chr1	102589785	102590339	+	0	NA	Intergenic	L1_Mus1|LINE|L1	1434294	NR_037989	100504525	Mm.87065	NR_037989	ENSMUSG00000100684	Gm20268	-	predicted gene, 20268	ncRNA
chr15	98892293	98892607	+	0	NA	3' UTR (NM_007857, exon 3 of 3)	3' UTR (NM_007857, exon 3 of 3)	6090	NM_007857	13363	Mm.324688	NM_007857	ENSMUSG00000023000	Dhh	C78960	desert hedgehog	protein-coding
chr11	96064831	96065905	+	0	NA	promoter-TSS (NM_172300)	promoter-TSS (NM_172300)	-4	NM_172300	268470	Mm.38802	NM_172300	ENSMUSG00000014349	Ube2z	AW049199|C030047H17Rik|D11Moh35	ubiquitin-conjugating enzyme E2Z	protein-coding
chr8	64196870	64197439	+	0	NA	intron (NM_009390, intron 1 of 20)	intron (NM_009390, intron 1 of 20)	8854	NM_009390	21892	Mm.418367	NM_009390	ENSMUSG00000053626	Tll1	Tll|Tll-1|b2b2476Clo	tolloid-like	protein-coding
chr11	97499782	97501255	+	0	NA	promoter-TSS (NM_001289118)	promoter-TSS (NM_001289118)	-178	NM_001289118	100141474	Mm.482426	NM_001289118	ENSMUSG00000047988	4933428G20Rik	-	RIKEN cDNA 4933428G20 gene	protein-coding
chr16	32608566	32609605	+	0	NA	promoter-TSS (NM_001357298)	promoter-TSS (NM_001357298)	-37	NM_001357298	22042	Mm.28683	NM_011638	ENSMUSG00000022797	Tfrc	2610028K12Rik|CD71|E430033M20Rik|Mtvr1|TFR|TFR1|TR|Trfr|p90	transferrin receptor	protein-coding
chr4	123896778	123897444	+	0	NA	Intergenic	Intergenic	-7902	NM_019660	56309	Mm.446553	NM_019660	ENSMUSG00000028647	Mycbp	5730488M09Rik|AW552132|AW742590|Amy-1	MYC binding protein	protein-coding
chr7	139801974	139802480	+	0	NA	Intergenic	MIR3|SINE|MIR	23209	NR_105827	102465215		NR_105827	ENSMUSG00000098619	Mir6401	Gm27442|mmu-mir-6401	microRNA 6401	ncRNA
chrX	80664206	80665276	+	0	NA	Intergenic	Intergenic	-405903	NM_138751	192216	Mm.490421	NM_138751	ENSMUSG00000025666	Tmem47	3010015F07Rik|AI115536|BCMP1|Tm4sf10	transmembrane protein 47	protein-coding
chr15	98567283	98568208	+	0	NA	promoter-TSS (NM_009833)	promoter-TSS (NM_009833)	-9	NM_001368702	12455	Mm.29941	NM_009833	ENSMUSG00000011960	Ccnt1	2810478G24Rik|AI115585|CycT1	cyclin T1	protein-coding
chr9	112445488	112446255	+	0	NA	Intergenic	(CA)n|Simple_repeat|Simple_repeat	189297	NR_033433	620760	Mm.259863	NR_015468	ENSMUSG00000087038	2900079G21Rik	C130083B14|Gm6179	RIKEN cDNA 2900079G21 gene	ncRNA
chr1	91178986	91180497	+	0	NA	promoter-TSS (NM_016894)	promoter-TSS (NM_016894)	-81	NM_016894	51801	Mm.3272	NM_016894	ENSMUSG00000034353	Ramp1	9130218E19Rik	receptor (calcitonin) activity modifying protein 1	protein-coding
chr1	81987030	81987952	+	0	NA	Intergenic	Intergenic	-144425	NR_105762	102466629		NR_105762	ENSMUSG00000098797	Mir6344	Gm27840|mmu-mir-6344	microRNA 6344	ncRNA
chr18	89012665	89013182	+	0	NA	intron (NM_175542, intron 13 of 48)	intron (NM_175542, intron 13 of 48)	40893	NR_105777	102466633		NR_105777	ENSMUSG00000098676	Mir6359	Gm27328|mmu-mir-6359	microRNA 6359	ncRNA
chr11	28853023	28854498	+	0	NA	intron (NM_146015, intron 1 of 10)	intron (NM_146015, intron 1 of 10)	555	NM_146015	216616	Mm.44176	NM_146015	ENSMUSG00000020467	Efemp1	-	epidermal growth factor-containing fibulin-like extracellular matrix protein 1	protein-coding
chr15	101834886	101835308	+	0	NA	Intergenic	Intergenic	15689	NM_008473	16678	Mm.183137	NM_008473	ENSMUSG00000046834	Krt1	Krt-2.1|Krt2-1|Krt86	keratin 1	protein-coding
chr10	80433276	80434311	+	0	NA	promoter-TSS (NM_011548)	promoter-TSS (NM_011548)	-140	NM_001164150	21423	Mm.3406	NM_011548	ENSMUSG00000020167	Tcf3	A1|AA408400|ALF2|AW209082|E12|E12/E47|E2A|E47|KA1|ME2|Pan1|Pan2|TCF-3|Tcfe2a|VDIR|bHLHb21	transcription factor 3	protein-coding
chr6	16879477	16879883	+	0	NA	intron (NM_031198, intron 1 of 6)	intron (NM_031198, intron 1 of 6)	18761	NM_031198	21426	Mm.36217	NM_031198	ENSMUSG00000029553	Tfec	BB107417|Tcfec|bHLHe34	transcription factor EC	protein-coding
chr9	62732477	62733228	+	0	NA	intron (NM_176922, intron 5 of 29)	intron (NM_176922, intron 5 of 29)	54997	NM_176922	319480	Mm.34883	NM_176922	ENSMUSG00000032243	Itga11	4732459H24Rik	integrin alpha 11	protein-coding
chr19	56685333	56685830	+	0	NA	Intergenic	Intergenic	-36536	NM_007419	11554	Mm.46797	NM_007419	ENSMUSG00000035283	Adrb1	Adrb-1|beta-AR	adrenergic receptor, beta 1	protein-coding
chr4	154285075	154285437	+	0	NA	intron (NM_001112744, intron 5 of 14)	intron (NM_001112744, intron 5 of 14)	14639	NM_001112744	230972	Mm.38481	NM_001112744	ENSMUSG00000029032	Arhgef16	-	Rho guanine nucleotide exchange factor (GEF) 16	protein-coding
chr9	107238715	107239700	+	0	NA	Intergenic	Intergenic	-7298	NM_153413	208869	Mm.150259	NM_153413	ENSMUSG00000039716	Dock3	MOCA|PBP|mKIAA0299	dedicator of cyto-kinesis 3	protein-coding
chr9	64473640	64474386	+	0	NA	intron (NM_172522, intron 1 of 22)	intron (NM_172522, intron 1 of 22)	88387	NM_001134399	214058	Mm.127721	NM_172522	ENSMUSG00000036466	Megf11	2410080H04Rik|D130061K05	multiple EGF-like-domains 11	protein-coding
chr6	129393086	129393531	+	0	NA	Intergenic	Intergenic	-3989	NM_001204239	56760	Mm.30700	NM_019985	ENSMUSG00000030159	Clec1b	1810061I13Rik|Clec-2|Clec2	C-type lectin domain family 1, member b	protein-coding
chr5	85670911	85671779	+	0	NA	Intergenic	RLTR25B|LTR|ERVK	394238	NM_001345904	12617	Mm.4649	NM_007683	ENSMUSG00000029253	Cenpc1	CENP-C|Cenpc	centromere protein C1	protein-coding
chr1	163600009	163600706	+	0	NA	Intergenic	Intergenic	124875	NM_001143956	240879	Mm.484621	NM_001143956	ENSMUSG00000040113	Mettl11b	Gm207|NTM1B	methyltransferase like 11B	protein-coding
chr15	98970874	98972180	+	0	NA	Intergenic	Intergenic	-14438	NR_045991	75951	Mm.441657	NR_045991	ENSMUSG00000097587	4930578M01Rik	3010001K12Rik	RIKEN cDNA 4930578M01 gene	ncRNA
chr4	134719733	134720204	+	0	NA	Intergenic	L1M2|LINE|L1	-15678	NM_207237	230815	Mm.18905	NM_207237	ENSMUSG00000037306	Man1c1	AI593348	mannosidase, alpha, class 1C, member 1	protein-coding
chr17	35829506	35830189	+	0	NA	exon (NM_008027, exon 9 of 13)	exon (NM_008027, exon 9 of 13)	6490	NM_008027	14251	Mm.2931	NM_008027	ENSMUSG00000059714	Flot1	reggie-2	flotillin 1	protein-coding
chr10	53652192	53652908	+	0	NA	intron (NM_001081428, intron 10 of 17)	intron (NM_001081428, intron 10 of 17)	-22593	NM_027830	71567	Mm.278221	NM_027830	ENSMUSG00000058298	Mcm9	9030408O17Rik|Gm235|Mcmdc1	minichromosome maintenance 9 homologous recombination repair factor	protein-coding
chr1	176655531	176656150	+	0	NA	Intergenic	Intergenic	116583	NR_029775	723921		NR_029775	ENSMUSG00000065573	Mir350	Mirn350|mir-350|mmu-mir-350	microRNA 350	ncRNA
chr11	106822715	106823448	+	0	NA	exon (NM_001362894, exon 19 of 20)	exon (NM_001362894, exon 19 of 20)	33829	NM_001166685	320162	Mm.30524	NM_177088	ENSMUSG00000018372	Cep95	4732496G21Rik|AI118346|AI448335|Ccdc45|D330027A14Rik|F630025I20Rik	centrosomal protein 95	protein-coding
chr9	61487827	61488387	+	0	NA	Intergenic	Intergenic	115741	NM_009389	21887	Mm.24255	NM_009389	ENSMUSG00000032280	Tle3	2610103N05Rik|ESG|Grg3a|Grg3b|mKIAA1547	transducin-like enhancer of split 3	protein-coding
chr6	18861885	18862407	+	0	NA	Intergenic	Intergenic	-4172	NM_001167757	75196	Mm.67665	NM_029202	ENSMUSG00000029517	Ankrd7	4930532L20Rik|AV278427	ankyrin repeat domain 7	protein-coding
chr2	110411319	110412112	+	0	NA	Intergenic	Intergenic	-48722	NM_026271	67606	Mm.291809	NM_026271	ENSMUSG00000074971	Fibin	1110018M03Rik	fin bud initiation factor homolog (zebrafish)	protein-coding
chr7	19282259	19283738	+	0	NA	intron (NM_013648, intron 1 of 9)	CpG	374	NM_013648	20167	Mm.24142	NM_013648	ENSMUSG00000030401	Rtn2	MMS10-P|Ms10p|NSPLI|Nspl1	reticulon 2 (Z-band associated protein)	protein-coding
chr5	84324829	84325528	+	0	NA	intron (NM_007937, intron 3 of 15)	intron (NM_007937, intron 3 of 15)	92204	NM_007937	13839	Mm.137991	NM_007937	ENSMUSG00000029245	Epha5	AI854630|AW125296|Cek7|Ehk1|Els1|Hek7|Rek7|bsk	Eph receptor A5	protein-coding
chr5	48285840	48286517	+	0	NA	intron (NR_111900, intron 32 of 35)	intron (NR_111900, intron 32 of 35)	62236	NR_029798	723822		NR_029798	ENSMUSG00000065603	Mir218-1	Mirn218-1|mir-218-1	microRNA 218-1	ncRNA
chr5	136292951	136293453	+	0	NA	intron (NM_001291233, intron 20 of 23)	intron (NM_001291233, intron 20 of 23)	-48262	NM_001302939	23921	Mm.425294	NM_018825	ENSMUSG00000005057	Sh2b2	Aps	SH2B adaptor protein 2	protein-coding
chr3	145959862	145960341	+	0	NA	Intergenic	Intergenic	22087	NM_025555	66421	Mm.25137	NM_025555	ENSMUSG00000036873	2410004B18Rik	4930572C24Rik	RIKEN cDNA 2410004B18 gene	protein-coding
chr17	33635263	33635619	+	0	NA	Intergenic	Intergenic	-2615	NM_001002842	378460	Mm.272606	NM_001002842	ENSMUSG00000032739	Pram1	AY665714	PML-RAR alpha-regulated adaptor molecule 1	protein-coding
chr15	95037395	95037811	+	0	NA	intron (NM_178789, intron 6 of 7)	intron (NM_178789, intron 6 of 7)	111715	NR_015482	100043315	Mm.159041	NR_015482	ENSMUSG00000100603	LOC100043315	-	uncharacterized LOC100043315	ncRNA
chr2	98662526	98662812	+	0	NA	Intergenic	SYNREP_MM|Satellite|Satellite	1195012	NM_001289744	241568	Mm.241682	NM_178725	ENSMUSG00000050587	Lrrc4c	6430556C10Rik|NGL-1	leucine rich repeat containing 4C	protein-coding
chr6	66057741	66058119	+	0	NA	Intergenic	Intergenic	105359	NM_001161773	67653	Mm.389756	NM_001161773	ENSMUSG00000036463	4930544G11Rik	-	RIKEN cDNA 4930544G11 gene	protein-coding
chr17	28079579	28080234	+	0	NA	intron (NM_001357681, intron 2 of 9)	CpG	678	NM_013687	21463	Mm.29758	NM_013687	ENSMUSG00000062859	Tcp11	D17Ken1|Tcp-11	t-complex protein 11	protein-coding
chr15	100100542	100101203	+	0	NA	intron (NR_037311, intron 2 of 3)	intron (NR_037311, intron 2 of 3)	-53524	NM_172819	239667	Mm.243658	NM_172819	ENSMUSG00000023026	Dip2b	4932422C22|AI317237|AI854602|mKIAA1463	disco interacting protein 2 homolog B	protein-coding
chr11	69297701	69299049	+	0	NA	Intergenic	Intergenic	25498	NM_172560	216846	Mm.28774	NM_172560	ENSMUSG00000032782	Cntrob	9830165K03Rik|Lip8|Nip2	centrobin, centrosomal BRCA2 interacting protein	protein-coding
chr11	106179610	106180318	+	0	NA	intron (NM_001252449, intron 2 of 10)	intron (NM_001252449, intron 2 of 10)	13639	NM_001252449	72149	Mm.403722	NM_028126	ENSMUSG00000069631	Strada	2610019A05Rik|6030402H20Rik|AI480680|E130112C09Rik	STE20-related kinase adaptor alpha	protein-coding
chr5	142963141	142964427	+	0	NA	intron (NM_007984, intron 1 of 4)	intron (NM_007984, intron 1 of 4)	3429	NM_007984	14086	Mm.289707	NM_007984	ENSMUSG00000029581	Fscn1	AI663989|Fan1|fascin-1	fascin actin-bundling protein 1	protein-coding
chr4	43208695	43209611	+	0	NA	intron (NM_021468, intron 11 of 39)	intron (NM_021468, intron 11 of 39)	-58006	NM_177195	320571	Mm.74465	NM_177195	ENSMUSG00000028457	Atp8b5	4930417M19Rik|Feta	ATPase, class I, type 8B, member 5	protein-coding
chr1	3903466	3904009	+	0	NA	Intergenic	Intergenic	-232239	NM_001011874	497097	Mm.454496	NM_001011874	ENSMUSG00000051951	Xkr4	AY534250|Gm210|XRG4|mKIAA1889	X-linked Kx blood group related 4	protein-coding
chr13	75867649	75868506	+	0	NA	Intergenic	Intergenic	28191	NM_053108	93692	Mm.25844	NM_053108	ENSMUSG00000021591	Glrx	C86710|D13Wsu156e|Glrx1|Grx1|TTase	glutaredoxin	protein-coding
chr1	19459862	19460599	+	0	NA	Intergenic	Intergenic	248176	NM_001025305	21419	Mm.137021	NM_009334	ENSMUSG00000025927	Tfap2b	AI606113|AP-2(beta)|E130018K07Rik|Tcfap2b	transcription factor AP-2 beta	protein-coding
chr5	135044656	135044891	+	0	NA	intron (NM_001359179, intron 6 of 8)	intron (NM_001359179, intron 6 of 8)	-19433	NM_025362	66114	Mm.178012	NM_025362	ENSMUSG00000061118	Dnajc30	1300007M11Rik|Wbscr18	DnaJ heat shock protein family (Hsp40) member C30	protein-coding
chr2	26311920	26312272	+	0	NA	Intergenic	Intergenic	-2515	NM_001355576	67839	Mm.266611	NM_153410	ENSMUSG00000026930	Gpsm1	1810037C22Rik|AW107933|Ags3	G-protein signalling modulator 1 (AGS3-like, C. elegans)	protein-coding
chr12	81948833	81949646	+	0	NA	intron (NM_018814, intron 10 of 35)	MER20|DNA|hAT-Charlie	89209	NM_018814	54604	Mm.86584	NM_018814	ENSMUSG00000021140	Pcnx	2900024E21Rik|3526401J03Rik|AF096286|AI327143|AI413187|Pcnx1|Pcnxl1	pecanex homolog	protein-coding
chr3	62398000	62398483	+	0	NA	intron (NM_001081295, intron 5 of 13)	intron (NM_001081295, intron 5 of 13)	59464	NM_001081295	622434	Mm.153974	NM_001081295	ENSMUSG00000036885	Arhgef26	4631416L12Rik|8430436L14Rik|AI303572|AW491953|SGEF	Rho guanine nucleotide exchange factor (GEF) 26	protein-coding
chr4	96545730	96546551	+	0	NA	intron (NM_010008, intron 1 of 8)	intron (NM_010008, intron 1 of 8)	7511	NM_010008	13110	Mm.98200	NM_010008	ENSMUSG00000052914	Cyp2j6	-	cytochrome P450, family 2, subfamily j, polypeptide 6	protein-coding
chr18	7984768	7985233	+	0	NA	Intergenic	L1VL4|LINE|L1	115287	NM_001360956	225131	Mm.204524	NM_153085	ENSMUSG00000024283	Wac	1110067P07Rik|A230035H12Rik|AI256735|AI256776|Wwp4	WW domain containing adaptor with coiled-coil	protein-coding
chr11	60416653	60418157	+	0	NA	promoter-TSS (NR_157083)	promoter-TSS (NR_157083)	260	NM_025757	66771	Mm.29950	NM_025757	ENSMUSG00000018415	Gid4	4933439F18Rik	GID complex subunit 4, VID24 homolog	protein-coding
chrX	85676763	85677416	+	0	NA	Intergenic	L1_Mus1|LINE|L1	99730	NM_008194	14933	Mm.246682	NM_008194	ENSMUSG00000025059	Gk	D930012N15Rik|Gyk	glycerol kinase	protein-coding
chr16	55232049	55232565	+	0	NA	exon (NM_178720, exon 10 of 12)	exon (NM_178720, exon 10 of 12)	50930	NM_178720	239852	Mm.245045	NM_178720	ENSMUSG00000064310	Zpld1	9430016A21Rik	zona pellucida like domain containing 1	protein-coding
chr2	166051774	166052609	+	0	NA	intron (NM_008679, intron 8 of 22)	intron (NM_008679, intron 8 of 22)	59554	NM_008679	17979	Mm.469663	NM_008679	ENSMUSG00000027678	Ncoa3	2010305B15Rik|AW321064|Actr|Aib1|KAT13B|Rac3|Src3|Tram-1|Tram1|bHLHe42|p/Cip|pCip	nuclear receptor coactivator 3	protein-coding
chr11	70701986	70702458	+	0	NA	intron (NM_153103, intron 1 of 22)	intron (NM_153103, intron 1 of 22)	1674	NM_153103	16562	Mm.99996	NM_153103	ENSMUSG00000020821	Kif1c	B430105J22Rik|D11Bwg1349e|Ltxs1|Orch3	kinesin family member 1C	protein-coding
chr1	4747347	4748611	+	0	NA	Intergenic	Intergenic	37747	NM_025300	27395	Mm.182927	NM_025300	ENSMUSG00000033845	Mrpl15	HSPC145|MRP-L7|Rpml7	mitochondrial ribosomal protein L15	protein-coding
chr4	141960149	141960568	+	0	NA	intron (NM_177868, intron 9 of 31)	intron (NM_177868, intron 9 of 31)	-22634	NR_040672	545691	Mm.332015	NR_040672	ENSMUSG00000085424	Fhad1os1	Gm13037	forkhead-associated (FHA) phosphopeptide binding domain 1, opposite strand 1	ncRNA
chr17	33930487	33931319	+	0	NA	intron (NM_009059, intron 2 of 17)	intron (NM_009059, intron 2 of 17)	1009	NM_009059	19732	Mm.43777	NM_009059	ENSMUSG00000041354	Rgl2	KE1.5|Rab2l|Rgt2|Rlf	ral guanine nucleotide dissociation stimulator-like 2	protein-coding
chr2	98666254	98667319	+	0	NA	Intergenic	GSAT_MM|Satellite|Satellite	1199129	NM_001289744	241568	Mm.241682	NM_178725	ENSMUSG00000050587	Lrrc4c	6430556C10Rik|NGL-1	leucine rich repeat containing 4C	protein-coding
chr9	58249578	58250156	+	0	NA	promoter-TSS (NM_008884)	promoter-TSS (NM_008884)	-81	NM_178087	18854	Mm.392123	NM_008884	ENSMUSG00000036986	Pml	1200009E24Rik|AI661194|Trim19	promyelocytic leukemia	protein-coding
chr17	33955280	33956213	+	0	NA	promoter-TSS (NM_011296)	promoter-TSS (NM_011296)	-54	NM_172620	224705	Mm.448614	NM_172620	ENSMUSG00000024319	Vps52	ARE1|D130068D18|D430041K17Rik|SAC2|Sacm2l|tclw5	VPS52 GARP complex subunit	protein-coding
chr13	44316729	44317985	+	0	NA	Intergenic	Intergenic	-100870	NR_045088	100503592	Mm.184925	NR_045088	ENSMUSG00000113186	A330076C08Rik	-	RIKEN cDNA A330076C08 gene	ncRNA
chr2	110871747	110872289	+	0	NA	intron (NM_001355246, intron 3 of 3)	intron (NM_001355246, intron 3 of 3)	-31959	NM_001355244	228432	Mm.483325	NM_001081556	ENSMUSG00000074968	Ano3	AI838058|B230324K02Rik|Tmem16c	anoctamin 3	protein-coding
chr12	11070919	11071536	+	0	NA	intron (NR_045860, intron 2 of 2)	intron (NR_045860, intron 2 of 2)	23414	NR_045860	71457	Mm.95280	NR_045860	ENSMUSG00000113620	7420701I03Rik	-	RIKEN cDNA 7420701I03 gene	ncRNA
chr11	76540903	76541482	+	0	NA	intron (NM_198894, intron 1 of 22)	intron (NM_198894, intron 1 of 22)	30192	NM_198895	109934	Mm.258939	NM_198018	ENSMUSG00000017631	Abr	-	active BCR-related gene	protein-coding
chr2	164402854	164403417	+	0	NA	promoter-TSS (NM_009036)	promoter-TSS (NM_009036)	-59	NM_009036	19668	Mm.473794	NM_009036	ENSMUSG00000017007	Rbpjl	RBP-L|Rbpsuhl	recombination signal binding protein for immunoglobulin kappa J region-like	protein-coding
chr3	96181071	96181431	+	0	NA	promoter-TSS (NM_022030)	promoter-TSS (NM_022030)	24	NM_022030	64051	Mm.491135	NM_022030	ENSMUSG00000038486	Sv2a	AI746429|mKIAA0736	synaptic vesicle glycoprotein 2 a	protein-coding
chr2	32351369	32353615	+	0	NA	intron (NM_001368679, intron 1 of 20)	intron (NM_001368679, intron 1 of 20)	837	NM_001301737	13429	Mm.44736	NM_010065	ENSMUSG00000026825	Dnm1	AI838169|Dnm|Ftfl|mKIAA4093	dynamin 1	protein-coding
chr9	27193319	27194018	+	0	NA	Intergenic	(C)n|Simple_repeat|Simple_repeat	-38247	NM_023277	83964	Mm.28770	NM_023277	ENSMUSG00000031990	Jam3	1110002N23Rik|JAM-3|JAM-C|Jcam3	junction adhesion molecule 3	protein-coding
chr9	45137979	45139299	+	0	NA	promoter-TSS (NM_001013390)	promoter-TSS (NM_001013390)	15	NM_001013390	399548	Mm.335112	NM_001013390	ENSMUSG00000046480	Scn4b	Gm1471	sodium channel, type IV, beta	protein-coding
chr2	155956087	155956972	+	0	NA	promoter-TSS (NM_177217)	promoter-TSS (NM_177217)	-29	NM_177217	16328	Mm.288729	NM_008383	ENSMUSG00000038241	Cep250	AW490617|B230210E21Rik|Cep2|Inmp	centrosomal protein 250	protein-coding
chr3	70091256	70091768	+	0	NA	Intergenic	Intergenic	83899	NM_001018031	229389	Mm.331071	NM_001018031	ENSMUSG00000027788	Otol1	Gm414	otolin 1	protein-coding
chr3	7449192	7449787	+	0	NA	Intergenic	RMER17D2|LTR|ERVK	-53937	NM_173181	67306	Mm.332366	NM_173181	ENSMUSG00000043542	Zc2hc1a	3110050N22Rik|AI790358|AU023959|Fam164a	zinc finger, C2HC-type containing 1A	protein-coding
chr15	79525680	79526924	+	0	NA	intron (NM_134090, intron 4 of 4)	MERVL_2A-int|LTR|ERVL	6615	NM_152806	67040	Mm.29644	NM_152806	ENSMUSG00000055065	Ddx17	2610007K22Rik|A430025E01Rik|AI047725|C80929|Gm926|p72	DEAD (Asp-Glu-Ala-Asp) box polypeptide 17	protein-coding
chr6	114914087	114914503	+	0	NA	intron (NM_001356371, intron 2 of 5)	intron (NM_001356371, intron 2 of 5)	7526	NM_177683	232334	Mm.268357	NM_177683	ENSMUSG00000030315	Vgll4	BC048841|VGL-4	vestigial like family member 4	protein-coding
chr1	180465368	180466160	+	0	NA	intron (NM_001081227, intron 1 of 3)	intron (NM_001081227, intron 1 of 3)	17740	NM_001081227	381310	Mm.44791	NM_001081227	ENSMUSG00000053963	Stum	6330403A02Rik|Gm10001|R75555	mechanosensory transduction mediator	protein-coding
chr11	75877685	75878055	+	0	NA	intron (NM_029548, intron 4 of 7)	intron (NM_029548, intron 4 of 7)	33189	NM_029548	380714	Mm.425697	NM_029548	ENSMUSG00000020847	Rph3al	Gm1753|Noc2	rabphilin 3A-like (without C2 domains)	protein-coding
chr7	80119032	80119617	+	0	NA	Intergenic	Intergenic	-3974	NM_173011	269951	Mm.246432	NM_173011	ENSMUSG00000030541	Idh2	E430004F23|IDPm|Idh-2	isocitrate dehydrogenase 2 (NADP+), mitochondrial	protein-coding
chr11	118445814	118446286	+	0	NA	intron (NR_045902, intron 2 of 2)	intron (NR_045902, intron 2 of 2)	2516	NM_001204130	56745	Mm.23845	NM_019959	ENSMUSG00000017446	C1qtnf1	1600017K21Rik|Adip|CTRP1|Zsig37	C1q and tumor necrosis factor related protein 1	protein-coding
chr7	46013299	46014161	+	0	NA	intron (NM_018795, intron 9 of 30)	MLTR14|LTR|ERV1	16556	NM_018795	27421	Mm.63514	NM_018795	ENSMUSG00000030834	Abcc6	Abcc1b|DCC|Dyscalc1|Mrp6|dyscalc	ATP-binding cassette, sub-family C (CFTR/MRP), member 6	protein-coding
chr11	115098269	115098844	+	0	NA	intron (NM_001163753, intron 1 of 8)	intron (NM_001163753, intron 1 of 8)	7125	NM_001163753	58222	Mm.143789	NM_021411	ENSMUSG00000020732	Rab37	B230331O03Rik|B230354I04Rik	RAB37, member RAS oncogene family	protein-coding
chr5	121286503	121286965	+	0	NA	exon (NM_181421, exon 13 of 76)	exon (NM_181421, exon 13 of 76)	66515	NM_181421	269700	Mm.184589	NM_181421	ENSMUSG00000042744	Hectd4	A130010L24|AU042671|BC019639|EG545802|Gm15800|mKIAA0614	HECT domain E3 ubiquitin protein ligase 4	protein-coding
chr4	155784028	155784811	+	0	NA	exon (NM_001033394, exon 2 of 2)	exon (NM_001033394, exon 2 of 2)	1455	NM_001033394	320587	Mm.384382	NM_001033394	ENSMUSG00000073680	Tmem88b	A230069A22Rik	transmembrane protein 88B	protein-coding
chr6	79560010	79560622	+	0	NA	Intergenic	Intergenic	-257715	NM_001190732	100463512	Mm.461086	NM_001190732	ENSMUSG00000096887	Gm20594	Mtrnr2l	predicted gene, 20594	protein-coding
chr9	80465425	80466219	+	0	NA	promoter-TSS (NM_022016)	promoter-TSS (NM_022016)	-384	NM_022016	63859	Mm.422780	NM_022016	ENSMUSG00000032343	Impg1	A930015H12Rik|IMP150|SPACR	interphotoreceptor matrix proteoglycan 1	protein-coding
chr11	3832340	3832856	+	0	NA	intron (NM_152818, intron 1 of 13)	B2_Mm2|SINE|B2	31305	NM_152818	74309	Mm.61022	NM_152818	ENSMUSG00000020435	Osbp2	1700095P05Rik|C630001G20Rik|Gm244|ORP-4|OSBPL1	oxysterol binding protein 2	protein-coding
chr17	35186775	35187057	+	0	NA	intron (NM_010734, intron 2 of 3)	intron (NM_010734, intron 2 of 3)	1524	NM_010734	16988	Mm.19379	NM_010734	ENSMUSG00000073412	Lst1	B144	leukocyte specific transcript 1	protein-coding
chr10	128326844	128327125	+	0	NA	intron (NM_019953, intron 5 of 5)	intron (NM_019953, intron 5 of 5)	4525	NM_019953	56530	Mm.44220	NM_019953	ENSMUSG00000025381	Cnpy2	5330432A10Rik|AW229003|D10Bwg1546e|Tmem4|Zsig9	canopy FGF signaling regulator 2	protein-coding
chr9	108284496	108284832	+	0	NA	Intergenic	Intergenic	-5779	NM_025449	66257	Mm.10407	NM_025449	ENSMUSG00000032606	Nicn1	1500032A17Rik|PGs5|p24	nicolin 1	protein-coding
chr17	25447611	25448292	+	0	NA	Intergenic	MER63C|DNA|hAT-Blackjack	-14168	NM_021415	58226	Mm.268378	NM_021415	ENSMUSG00000024112	Cacna1h	Cav3.2|MNCb-1209|alpha13.2	calcium channel, voltage-dependent, T type, alpha 1H subunit	protein-coding
chr2	30391991	30393120	+	0	NA	intron (NR_110963, intron 1 of 4)	CpG	301	NR_110963	57170	Mm.285167	NM_020329	ENSMUSG00000026856	Dolpp1	0610011H20Rik|AB030189|LSFR2	dolichyl pyrophosphate phosphatase 1	protein-coding
chr5	115489218	115490590	+	0	NA	Intergenic	PB1D7|SINE|Alu	-5420	NM_133760	75387	Mm.332616	NM_133760	ENSMUSG00000029524	Sirt4	4930596O17Rik	sirtuin 4	protein-coding
chr7	19456596	19457017	+	0	NA	intron (NM_001368427, intron 1 of 17)	intron (NM_001368427, intron 1 of 17)	2037	NM_001368427	232944	Mm.260504	NM_172279	ENSMUSG00000030397	Mark4	2410090P21Rik|Markl1	MAP/microtubule affinity regulating kinase 4	protein-coding
chr1	107985437	107986346	+	0	NA	Intergenic	L1M5|LINE|L1	68632	NR_102306	319596	Mm.136054	NR_102306	ENSMUSG00000100457	D830032E09Rik	-	RIKEN cDNA D830032E09 gene	ncRNA
chr4	27993483	27994917	+	0	NA	Intergenic	ORR1D2|LTR|ERVL-MaLR	-818931	NM_010141	13841	Mm.257266	NM_010141	ENSMUSG00000028289	Epha7	Cek11|Ebk|Ehk3|Hek11|Mdk1	Eph receptor A7	protein-coding
chr5	35137357	35138706	+	0	NA	Intergenic	Intergenic	-32332	NM_013587	16976	Mm.277661	NM_013587	ENSMUSG00000029103	Lrpap1	AA617339|AI790446|AU042172|C77774|HBP44|RAP	low density lipoprotein receptor-related protein associated protein 1	protein-coding
chr17	42150301	42150782	+	0	NA	Intergenic	Intergenic	-165406	NM_028474	627626	Mm.390999	NM_028474	ENSMUSG00000042256	Ptchd4	3110082D06Rik|Gm321	patched domain containing 4	protein-coding
chr2	156563386	156564254	+	0	NA	intron (NM_001164818, intron 4 of 4)	L2b|LINE|L2	16244	NM_026661	68295	Mm.253648	NM_026661	ENSMUSG00000027628	Aar2	0610011L14Rik	AAR2 splicing factor homolog	protein-coding
chr12	34641923	34642462	+	0	NA	intron (NM_001271386, intron 3 of 27)	intron (NM_001271386, intron 3 of 27)	-113303	NM_024124	79221	Mm.310551	NM_024124	ENSMUSG00000004698	Hdac9	AV022454|D030072B18Rik|HD7B|HD9|HDRP|Hdac7b|Mitr|mKIAA0744	histone deacetylase 9	protein-coding
chr14	25629695	25631055	+	0	NA	intron (NM_183208, intron 6 of 23)	intron (NM_183208, intron 6 of 23)	26862	NM_001309430	100188919	Mm.473810	NM_001309430		Gm45915	Israa	predicted gene, 45915	protein-coding
chr8	14412148	14412715	+	0	NA	intron (NM_001145965, intron 2 of 14)	intron (NM_001145965, intron 2 of 14)	316556	NM_001145965	244310	Mm.404697	NM_172910	ENSMUSG00000047495	Dlgap2	6430596N04Rik|Dap-2|Dap2|Sapap2	DLG associated protein 2	protein-coding
chr8	57457073	57457590	+	0	NA	intron (NM_009136, intron 1 of 2)	intron (NM_009136, intron 1 of 2)	1408	NM_009136	20284	Mm.12886	NM_009136	ENSMUSG00000031610	Scrg1	AW124307	scrapie responsive gene 1	protein-coding
chr11	101689675	101690209	+	0	NA	Intergenic	Intergenic	24401	NM_025404	80981	Mm.266840	NM_025404	ENSMUSG00000034936	Arl4d	1110036H21Rik|ARL6|AW456149|Arf4l|Arfl4|Arl5	ADP-ribosylation factor-like 4D	protein-coding
chr5	117240215	117241338	+	0	NA	intron (NM_001081308, intron 12 of 19)	intron (NM_001081308, intron 12 of 19)	46788	NM_018858	23980	Mm.195898	NM_018858	ENSMUSG00000032959	Pebp1	HCNP|Pbp|Pbp1|Pbpr|Rkip	phosphatidylethanolamine binding protein 1	protein-coding
chr5	57363627	57364330	+	0	NA	Intergenic	Intergenic	353941	NR_015588	319216	Mm.332387	NR_015588	ENSMUSG00000097216	4932441J04Rik	-	RIKEN cDNA 4932441J04 gene	ncRNA
chr9	110781098	110782066	+	0	NA	Intergenic	CpG	-16603	NM_153099	235628	Mm.292285	NM_153099	ENSMUSG00000044664	Prss42	Tessp2	protease, serine 42	protein-coding
chr11	59505344	59507073	+	0	NA	non-coding (NR_015585, exon 1 of 5)	non-coding (NR_015585, exon 1 of 5)	432	NM_001130529	268417	Mm.239793	NM_172941	ENSMUSG00000020472	Zkscan17	Nizp1|Zfp496|Znf496	zinc finger with KRAB and SCAN domains 17	protein-coding
chr1	191426045	191426395	+	0	NA	Intergenic	Intergenic	-29179	NM_144880	226849	Mm.205569	NM_144880	ENSMUSG00000026626	Ppp2r5a	PR61alpha	protein phosphatase 2, regulatory subunit B', alpha	protein-coding
chr2	27514046	27515612	+	0	NA	promoter-TSS (NM_080848)	promoter-TSS (NM_080848)	-318	NM_080848	140858	Mm.28265	NM_080848	ENSMUSG00000026917	Wdr5	2410008O07Rik|AA408785|AA960360|Big|Big-3	WD repeat domain 5	protein-coding
chr2	180115264	180115587	+	0	NA	Intergenic	Intergenic	-3881	NM_144500	228983	Mm.253578	NM_144500	ENSMUSG00000039050	Osbpl2	C130070J12Rik|ORP-2|Orp2	oxysterol binding protein-like 2	protein-coding
chr11	97994722	97995228	+	0	NA	intron (NM_207231, intron 2 of 5)	intron (NM_207231, intron 2 of 5)	1198	NR_152188	217151	Mm.277896	NM_207231	ENSMUSG00000038352	Arl5c	Arl12|BC065791	ADP-ribosylation factor-like 5C	protein-coding
chr13	114838407	114839320	+	0	NA	intron (NM_008396, intron 28 of 29)	intron (NM_008396, intron 28 of 29)	20626	NM_001113374	17434	Mm.19027	NM_013826	ENSMUSG00000015536	Mocs2	AI415403	molybdenum cofactor synthesis 2	protein-coding
chr6	67406985	67407661	+	0	NA	Intergenic	Intergenic	-31135	NM_008354	16162	Mm.188337	NM_008354	ENSMUSG00000018341	Il12rb2	A930027I18Rik|IL-12RB2|Ifnm	interleukin 12 receptor, beta 2	protein-coding
chr12	111823434	111824108	+	0	NA	exon (NM_026752, exon 3 of 7)	exon (NM_026752, exon 3 of 7)	9601	NM_026752	68520	Mm.390497	NM_026752	ENSMUSG00000021286	Zfyve21	1110013H04Rik|AW558780|C85416	zinc finger, FYVE domain containing 21	protein-coding
chr1	92268976	92270536	+	0	NA	Intergenic	Intergenic	-89415	NM_207225	208727	Mm.318567	NM_207225	ENSMUSG00000026313	Hdac4	4932408F19Rik|HD4	histone deacetylase 4	protein-coding
chr17	27595579	27596635	+	0	NA	intron (NM_001291046, intron 2 of 4)	intron (NM_001291046, intron 2 of 4)	26857	NM_001291046	56409	Mm.144699	NM_019837	ENSMUSG00000024213	Nudt3	1110011B09Rik|AA960325|Dipp|Dipp1	nudix (nucleotide diphosphate linked moiety X)-type motif 3	protein-coding
chr8	51944534	51945465	+	0	NA	Intergenic	Lx2B2|LINE|L1	-411612	NR_151738	330767	Mm.246790	NR_151738	ENSMUSG00000110013	1190028D05Rik	-	RIKEN cDNA 1190028D05 gene	ncRNA
chr2	120867256	120867867	+	0	NA	TTS (NR_038350)	TTS (NR_038350)	16905	NR_038350	100502700	Mm.330516	NR_038349	ENSMUSG00000087519	AV039307	-	expressed sequence AV039307	ncRNA
chr7	127776338	127777869	+	0	NA	promoter-TSS (NM_178029)	promoter-TSS (NM_178029)	-286	NM_178029	233904	Mm.435494	NM_010940	ENSMUSG00000042308	Setd1a	BC010250|KMT2F|Nsccn1|mKIAA0339|mNSC1	SET domain containing 1A	protein-coding
chr2	26408590	26409378	+	0	NA	TTS (NM_153125)	TTS (NM_153125)	143	NM_001290437	64436	Mm.330070	NM_033134	ENSMUSG00000026925	Inpp5e	1200002L24Rik|72kDa|mKIAA0123	inositol polyphosphate-5-phosphatase E	protein-coding
chrX	108842640	108843201	+	0	NA	intron (NR_015493, intron 2 of 4)	L1M4|LINE|L1	8442	NR_015493	69964	Mm.160066	NR_015493	ENSMUSG00000086629	2810403D21Rik	1810022M18Rik|4632410B05Rik|AU017716	RIKEN cDNA 2810403D21 gene	ncRNA
chr5	32785232	32786056	+	0	NA	promoter-TSS (NM_177298)	promoter-TSS (NM_177298)	-18	NM_177298	320951	Mm.273765	NM_177298	ENSMUSG00000023452	Pisd	9030221M09Rik	phosphatidylserine decarboxylase	protein-coding
chr13	55989536	55990813	+	0	NA	Intergenic	MIR|SINE|MIR	145376	NM_001159514	26914	Mm.283802	NM_012015	ENSMUSG00000015937	H2afy	H2AF12M|mH2a1|macroH2A1	H2A histone family, member Y	protein-coding
chr9	58116141	58116692	+	0	NA	intron (NM_001166282, intron 3 of 19)	intron (NM_001166282, intron 3 of 19)	2407	NM_001166282	382077	Mm.335193	NM_029212	ENSMUSG00000037716	Ccdc33	4930535E21Rik|Gm1117|Tzip1	coiled-coil domain containing 33	protein-coding
chr11	79961931	79962851	+	0	NA	promoter-TSS (NM_144826)	promoter-TSS (NM_144826)	-4	NM_144826	216987	Mm.274961	NM_144826	ENSMUSG00000035575	Utp6	4732497O03Rik|HCA66	UTP6 small subunit processome component	protein-coding
chr10	46006201	46007166	+	0	NA	Intergenic	Intergenic	198979	NR_040624	320363	Mm.123343	NR_040624	ENSMUSG00000110874	D030045P18Rik	-	RIKEN cDNA D030045P18 gene	ncRNA
chr14	96233583	96234473	+	0	NA	intron (NM_053105, intron 6 of 10)	intron (NM_053105, intron 6 of 10)	285006	NM_053105	93688	Mm.308735	NM_053105	ENSMUSG00000022076	Klhl1	mKIAA1490	kelch-like 1	protein-coding
chr6	73868489	73869859	+	0	NA	Intergenic	Intergenic	-260501	NR_157242	102634075	Mm.78553	NR_157242	ENSMUSG00000107441	Gm31747	-	predicted gene, 31747	ncRNA
chr9	65032104	65033175	+	0	NA	intron (NM_028906, intron 1 of 20)	CpG	181	NM_028906	74388	Mm.202749	NM_028906	ENSMUSG00000032393	Dpp8	2310004I03Rik|4932434F09Rik|AI666706|DPP VIII	dipeptidylpeptidase 8	protein-coding
chr12	110969802	110970859	+	0	NA	3' UTR (NM_001289510, exon 20 of 20)	3' UTR (NM_001289510, exon 20 of 20)	8288	NM_001361917	74251	Mm.250989	NM_175207	ENSMUSG00000037904	Ankrd9	2500003O20Rik	ankyrin repeat domain 9	protein-coding
chr9	5811764	5812220	+	0	NA	Intergenic	Lx5|LINE|L1	-356494	NM_001357398	71785	Mm.390122	NM_027924	ENSMUSG00000032006	Pdgfd	1110003I09Rik	platelet-derived growth factor, D polypeptide	protein-coding
chr11	117567035	117567376	+	0	NA	Intergenic	Intergenic	-44042	NR_015489	78403	Mm.212543	NR_015489		2900041M22Rik	-	RIKEN cDNA 2900041M22 gene	ncRNA
chr2	157565980	157567019	+	0	NA	promoter-TSS (NM_016916)	promoter-TSS (NM_016916)	-138	NM_016916	53619	Mm.480461	NM_016916	ENSMUSG00000067787	Blcap	AI462828|Bc10	bladder cancer associated protein	protein-coding
chr1	141984779	141985252	+	0	NA	Intergenic	Intergenic	-1328613	NR_040604	75910	Mm.483845	NR_040604	ENSMUSG00000102368	4930590L20Rik	-	RIKEN cDNA 4930590L20 gene	ncRNA
chr10	103442877	103443620	+	0	NA	Intergenic	Intergenic	75440	NM_001252330	103098	Mm.458408	NM_175328	ENSMUSG00000019894	Slc6a15	AA536730|AI326450|AI326451|v7-3	solute carrier family 6 (neurotransmitter transporter), member 15	protein-coding
chr7	122304626	122304891	+	0	NA	intron (NM_001316672, intron 2 of 16)	MIR|SINE|MIR	15633	NM_001316672	18751	Mm.207496	NM_008855	ENSMUSG00000052889	Prkcb	PKC-B|PKC-Beta|Pkcb|Prkcb1|Prkcb2	protein kinase C, beta	protein-coding
chr2	28169087	28169789	+	0	NA	Intergenic	Intergenic	-23655	NM_001038614	56177	Mm.43278	NM_019498	ENSMUSG00000026833	Olfm1	AMY|AW742568|Noe1|OlfA|Pancortin|Pancortin3	olfactomedin 1	protein-coding
chr11	117730029	117730783	+	0	NA	intron (NM_198022, intron 5 of 21)	intron (NM_198022, intron 5 of 21)	49242	NR_154387	217353	Mm.286963	NM_145439	ENSMUSG00000025572	Tmc6	D11Ertd204e|EVER1	transmembrane channel-like gene family 6	protein-coding
chr2	80819139	80819664	+	0	NA	Intergenic	Intergenic	180137	NM_001190179	69482	Mm.29200	NM_027091	ENSMUSG00000026999	Nup35	2310006I24Rik|35kDa|5330402E05Rik|MP44|NO44	nucleoporin 35	protein-coding
chr2	123920299	123920865	+	0	NA	Intergenic	Intergenic	-169387	NM_001290997	214968	Mm.330536	NM_172537	ENSMUSG00000027200	Sema6d	1110067B02Rik|AA409156|D330011G23|mKIAA1479	sema domain, transmembrane domain (TM), and cytoplasmic domain, (semaphorin) 6D	protein-coding
chr15	98740127	98740822	+	0	NA	exon (NM_001355510, exon 5 of 5)	exon (NM_001355510, exon 5 of 5)	-12276	NM_024169	66120	Mm.30729	NM_024169	ENSMUSG00000003355	Fkbp11	1110002O23Rik|FKBP-11	FK506 binding protein 11	protein-coding
chr7	132281575	132282352	+	0	NA	intron (NM_029935, intron 1 of 7)	intron (NM_029935, intron 1 of 7)	-33701	NR_028578	100043682	Mm.482794	NR_028578	ENSMUSG00000109270	Gm10584	-	predicted gene 10584	ncRNA
chr9	66834299	66835377	+	0	NA	promoter-TSS (NM_026674)	promoter-TSS (NM_026674)	-132	NM_026674	68318	Mm.284229	NM_026674	ENSMUSG00000053040	Aph1c	0610008A10Rik|APH-1b|Aph1b	aph1 homolog C, gamma secretase subunit	protein-coding
chr2	16820372	16821182	+	0	NA	Intergenic	RMER15-int|LTR|ERVL	192949	NR_040632	75069	Mm.50378	NR_040632		4930515L03Rik	-	RIKEN cDNA 4930515L03 gene	ncRNA
chr17	28729311	28729750	+	0	NA	intron (NM_001168508, intron 8 of 11)	intron (NM_001168508, intron 8 of 11)	36962	NM_001168513	26416	Mm.311337	NM_011951	ENSMUSG00000053436	Mapk14	CSBP2|Crk1|Csbp1|Mxi2|PRKM14|PRKM15|p38|p38-alpha|p38MAPK|p38a|p38alpha	mitogen-activated protein kinase 14	protein-coding
chr17	27997086	27997749	+	0	NA	intron (NM_181413, intron 11 of 24)	intron (NM_181413, intron 11 of 24)	83167	NM_013687	21463	Mm.29758	NM_013687	ENSMUSG00000062859	Tcp11	D17Ken1|Tcp-11	t-complex protein 11	protein-coding
chr15	98969730	98970114	+	0	NA	Intergenic	ORR1D2|LTR|ERVL-MaLR	-16043	NR_045991	75951	Mm.441657	NR_045991	ENSMUSG00000097587	4930578M01Rik	3010001K12Rik	RIKEN cDNA 4930578M01 gene	ncRNA
chr16	63569773	63570152	+	0	NA	intron (NM_001362452, intron 13 of 16)	intron (NM_001362452, intron 13 of 16)	294213	NM_001362452	13837	Mm.1977	NM_010140	ENSMUSG00000052504	Epha3	AW492086|Cek4|EK4|ETK1|End3|Hek|Hek4|Mek4|Tyro4	Eph receptor A3	protein-coding
chr17	35164407	35165523	+	0	NA	promoter-TSS (NM_020027)	promoter-TSS (NM_020027)	-88	NM_020027	53761	Mm.272462	NM_020027	ENSMUSG00000024393	Prrc2a	3110039B05Rik|Bat-2|Bat2|D17H6S51E|G2|Wbp12|mKIAA4178	proline-rich coiled-coil 2A	protein-coding
chr5	114443719	114444529	+	0	NA	promoter-TSS (NM_029956)	promoter-TSS (NM_029956)	-97	NM_001347398	77697	Mm.105182	NM_029956	ENSMUSG00000029575	Mmab	9130222L19Rik|ATR	methylmalonic aciduria (cobalamin deficiency) cblB type homolog (human)	protein-coding
chr5	113641063	113641684	+	0	NA	intron (NM_001359060, intron 2 of 4)	intron (NM_001359060, intron 2 of 4)	2230	NM_001359060	14747	Mm.5196	NM_008153	ENSMUSG00000042190	Cmklr1	ChemR23|DEZ|Gpcr27|mcmklr1	chemokine-like receptor 1	protein-coding
chr2	156664227	156665696	+	0	NA	5' UTR (NM_146128, exon 2 of 13)	5' UTR (NM_146128, exon 2 of 13)	51264	NM_001277187	228836	Mm.22094	NM_146128	ENSMUSG00000061689	Dlgap4	AI225853|BC024558|DAP-4|DAP4|SAPAP-4|Sapap4|WBP16	DLG associated protein 4	protein-coding
chr2	139685795	139686489	+	0	NA	intron (NM_001276489, intron 1 of 5)	HAL1ME|LINE|L1	7964	NM_001276489	319909	Mm.41113	NM_001126490	ENSMUSG00000074766	Ism1	5430433G21Rik|Ism	isthmin 1, angiogenesis inhibitor	protein-coding
chr11	97400312	97400775	+	0	NA	Intergenic	Intergenic	38251	NM_138657	192157	Mm.34339	NM_138657	ENSMUSG00000038485	Socs7	2310063P06Rik|C85125|Nap4	suppressor of cytokine signaling 7	protein-coding
chr6	12809405	12809917	+	0	NA	Intergenic	Intergenic	-60408	NM_001164805	330267	Mm.11989	NM_001164805	ENSMUSG00000032625	Thsd7a	Gm837	thrombospondin, type I, domain containing 7A	protein-coding
chr13	104681342	104681860	+	0	NA	intron (NM_001360094, intron 11 of 13)	intron (NM_001360094, intron 11 of 13)	135352	NM_001360094	67285	Mm.235398	NM_026072	ENSMUSG00000021715	Cwc27	3110009E13Rik|NY-CO-10|Sdccag10	CWC27 spliceosome-associated protein	protein-coding
chr4	106963751	106964946	+	0	NA	intron (NM_001355532, intron 1 of 14)	intron (NM_001355532, intron 1 of 14)	41163	NM_001355532	72475	Mm.195635	NM_023672	ENSMUSG00000061887	Ssbp3	2610021L12Rik|2610200M23Rik|5730488C10Rik|AI854733|AW551939|LAST|SSDP1	single-stranded DNA binding protein 3	protein-coding
chr1	104546481	104546980	+	0	NA	Intergenic	Intergenic	-221790	NM_011800	23836	Mm.103640	NM_011800	ENSMUSG00000050840	Cdh20	Cdh7	cadherin 20	protein-coding
chr10	54059513	54060136	+	0	NA	intron (NM_008548, intron 2 of 12)	intron (NM_008548, intron 2 of 12)	15913	NM_008548	17155	Mm.117294	NM_008548	ENSMUSG00000003746	Man1a	Man1a1|PCR1	mannosidase 1, alpha	protein-coding
chr18	15433583	15434146	+	0	NA	Intergenic	Intergenic	-22882	NM_001308643	11829	Mm.250786	NM_009700	ENSMUSG00000024411	Aqp4	WCH4	aquaporin 4	protein-coding
chr14	7657650	7659168	+	0	NA	Intergenic	CpG	-89843	NM_001270842	100041874	Mm.350858	NM_001270842	ENSMUSG00000079364	Gm3558	-	predicted gene 3558	protein-coding
chr13	84741310	84742104	+	0	NA	Intergenic	Intergenic	-447678	NM_023243	66671	Mm.18474	NM_023243	ENSMUSG00000021548	Ccnh	6330408H09Rik|AI661354|AV102684|AW538719	cyclin H	protein-coding
chr11	120120625	120121142	+	0	NA	intron (NM_001164802, intron 10 of 10)	intron (NM_001164802, intron 10 of 10)	21949	NM_001110242	208501	Mm.46699	NM_001110242	ENSMUSG00000078572	Ndufaf8	1810043H04Rik	NADH:ubiquinone oxidoreductase complex assembly factor 8	protein-coding
chr1	150933337	150934089	+	0	NA	intron (NM_001024720, intron 1 of 106)	L2a|LINE|L2	59722	NM_001024720	545370	Mm.379425	NM_001024720	ENSMUSG00000066842	Hmcn1	EG545370|FIBL-6|Gm201	hemicentin 1	protein-coding
chrX	97706101	97706837	+	0	NA	Intergenic	Intergenic	-329260	NM_001161433	245527	Mm.189270	NM_175540	ENSMUSG00000034457	Eda2r	9430060M22Rik|TNFRSF27|Xedar	ectodysplasin A2 receptor	protein-coding
chr5	121397449	121398481	+	0	NA	promoter-TSS (NM_172722)	promoter-TSS (NM_172722)	-30	NM_172722	231713	Mm.33919	NM_172722	ENSMUSG00000042719	Naa25	4833422K13Rik|A630046C11|AI450868|C330023M02Rik|Mdm20	N(alpha)-acetyltransferase 25, NatB auxiliary subunit	protein-coding
chr11	78791741	78793601	+	0	NA	Intergenic	Intergenic	-33924	NM_001076681	66274	Mm.258932	NM_001076681	ENSMUSG00000072640	Lyrm9	1810012P15Rik	LYR motif containing 9	protein-coding
chr4	135714810	135715037	+	0	NA	Intergenic	Intergenic	-13236	NM_178257	230828	Mm.261647	NM_178257	ENSMUSG00000037157	Il22ra1	9130219A07Rik|IL-22R|Il22r	interleukin 22 receptor, alpha 1	protein-coding
chr5	142502261	142502704	+	0	NA	intron (NM_001289588, intron 5 of 14)	intron (NM_001289588, intron 5 of 14)	27594	NM_019943	56522	Mm.441372	NM_019943	ENSMUSG00000074817	Papolb	PAP|Paplob|Papola-ps|Papt|Plap-ps|Tpap	poly (A) polymerase beta (testis specific)	protein-coding
chr4	139933109	139933727	+	0	NA	promoter-TSS (NR_045160)	promoter-TSS (NR_045160)	-344	NR_045160	71235	Mm.61253	NR_045159	ENSMUSG00000085928	4933427I22Rik	-	RIKEN cDNA 4933427I22 gene	ncRNA
chr1	116475883	116477077	+	0	NA	intron (NM_001371013, intron 19 of 23)	intron (NM_001371013, intron 19 of 23)	791743	NM_001371013
chr12	43575818	43576307	+	0	NA	Intergenic	Intergenic	-541845	NR_148724	102636207		NR_148724		Gm33340	Gm40882	predicted gene, 33340	ncRNA
chr6	61136318	61136965	+	0	NA	Intergenic	Intergenic	-43684	NM_001164316	232035	Mm.150324	NM_183310	ENSMUSG00000039578	Ccser1	6230405M12Rik|C130092O11Rik|Fam190a	coiled-coil serine rich 1	protein-coding
chr7	144316313	144317269	+	0	NA	intron (NM_001081370, intron 2 of 10)	intron (NM_001081370, intron 2 of 10)	32397	NM_001081370	210274	Mm.483624	NM_001081370	ENSMUSG00000037541	Shank2	ProSAP1|mKIAA1022	SH3 and multiple ankyrin repeat domains 2	protein-coding
chr2	120256392	120256723	+	0	NA	Intergenic	RLTR30D2_MM|LTR|ERV1	-11222	NM_001363090	329502	Mm.330505	NM_177845	ENSMUSG00000050211	Pla2g4e	2310026J01Rik|C230096D22|Pla2epsilon	phospholipase A2, group IVE	protein-coding
chr4	42890082	42890421	+	0	NA	Intergenic	Intergenic	-16017	NM_177785	277773	Mm.212727	NM_177785	ENSMUSG00000050141	Fam205c	4931430D02|FAM205CP	family with sequence similarity 205, member C	protein-coding
chr4	86619927	86620879	+	0	NA	Intergenic	Intergenic	-8348	NM_173400	230376	Mm.74730	NM_173400	ENSMUSG00000038047	Haus6	6230416J20Rik|9830144E06|D4Ertd27e|mKIAA1574	HAUS augmin-like complex, subunit 6	protein-coding
chr16	11090930	11091264	+	0	NA	intron (NM_029582, intron 7 of 11)	intron (NM_029582, intron 7 of 11)	-3167	NM_134105	106200	Mm.291015	NM_029582	ENSMUSG00000022498	Txndc11	2810408E11Rik|AI427833|EFP1|Txdc11	thioredoxin domain containing 11	protein-coding
chr10	23162283	23162764	+	0	NA	intron (NM_001347372, intron 5 of 18)	intron (NM_001347372, intron 5 of 18)	187367	NM_001347372	14051	Mm.332128	NM_010167	ENSMUSG00000010461	Eya4	B130023L16Rik	EYA transcriptional coactivator and phosphatase 4	protein-coding
chr11	86646052	86646801	+	0	NA	intron (NM_029478, intron 5 of 11)	intron (NM_029478, intron 5 of 11)	24849	NM_001356531	75909	Mm.390398	NM_029478	ENSMUSG00000018171	Vmp1	3110098I04Rik|4930579A11Rik|AI787464|Tango5|Tmem49|mir-21a|ni-2	vacuole membrane protein 1	protein-coding
chr5	122941305	122941628	+	0	NA	intron (NM_001003953, intron 8 of 22)	intron (NM_001003953, intron 8 of 22)	-41116	NM_013910	30841	Mm.86406	NM_013910	ENSMUSG00000029475	Kdm2b	Cxxc2|Fbl10|Fbxl10|Jhdm1b|PCCX2	lysine (K)-specific demethylase 2B	protein-coding
chr2	29234140	29234370	+	0	NA	intron (NM_133500, intron 1 of 6)	intron (NM_133500, intron 1 of 6)	13844	NM_001305805	171171	Mm.442448	NM_133500	ENSMUSG00000035513	Ntng2	2610016D08Rik|Lmnt2	netrin G2	protein-coding
chr4	138228425	138228913	+	0	NA	exon (NM_001122896, exon 5 of 12)	exon (NM_001122896, exon 5 of 12)	11542	NM_001356432	15441	Mm.348429	NM_010470	ENSMUSG00000028759	Hp1bp3	Hp1bp74	heterochromatin protein 1, binding protein 3	protein-coding
chr17	24048856	24049569	+	0	NA	3' UTR (NM_027008, exon 6 of 6)	3' UTR (NM_027008, exon 6 of 6)	10969	NM_175440	213171	Mm.133083	NM_175440	ENSMUSG00000050762	Prss27	CAPH2|Mpn|marapsin	protease, serine 27	protein-coding
chr5	133532265	133533124	+	0	NA	Intergenic	Intergenic	-567054	NM_030719	80909	Mm.45218	NM_030719	ENSMUSG00000015944	Castor2	7530428J21Rik|AW742413|Gats|Gatsl1|Gatsl2	cytosolic arginine sensor for mTORC1 subunit 2	protein-coding
chr12	108240999	108241796	+	0	NA	intron (NM_001159910, intron 1 of 5)	intron (NM_001159910, intron 1 of 5)	33996	NM_001159910	668158		NM_001159910	ENSMUSG00000084883	Ccdc85c	EG668158|Gm265|Gm9010|hhy	coiled-coil domain containing 85C	protein-coding
chr10	101003334	101004030	+	0	NA	Intergenic	Intergenic	-262047	NR_152765	102639396	Mm.404529	NR_152765		Gm35722	-	predicted gene, 35722	ncRNA
chr5	126438595	126439067	+	0	NA	Intergenic	Intergenic	-588930	NM_001370875	231736		NM_001370875		Gm4868	EG231736	predicted gene 4868	protein-coding
chr15	78473035	78473634	+	0	NA	Intergenic	Intergenic	-4700	NM_027902	71753	Mm.34056	NM_027902	ENSMUSG00000016942	Tmprss6	1300008A22Rik	transmembrane serine protease 6	protein-coding
chr5	143711241	143711893	+	0	NA	intron (NM_029749, intron 17 of 17)	intron (NM_029749, intron 17 of 17)	20713	NM_029749	76800	Mm.259620	NM_029749	ENSMUSG00000051306	Usp42	2410140K03Rik|3110031A07Rik|A630018G05Rik|D5Ertd591e	ubiquitin specific peptidase 42	protein-coding
chr5	121700300	121700923	+	0	NA	Intergenic	Intergenic	-10998	NM_009125	20239	Mm.260900	NM_009125	ENSMUSG00000042605	Atxn2	9630045M23Rik|ATX2|AW544490|Sca2	ataxin 2	protein-coding
chr7	113160914	113161840	+	0	NA	Intergenic	Intergenic	-19362	NR_045978	75239	Mm.381688	NR_045978	ENSMUSG00000110009	4930543E12Rik	4930545H14Rik	RIKEN cDNA 4930543E12 gene	ncRNA
chr11	118585317	118585741	+	0	NA	intron (NM_001285436, intron 3 of 13)	intron (NM_001285436, intron 3 of 13)	108697	NM_172573	217364	Mm.473963	NM_172573	ENSMUSG00000033857	Engase	C130099A03|D230014K01Rik	endo-beta-N-acetylglucosaminidase	protein-coding
chr12	111800316	111800862	+	0	NA	intron (NM_001025360, intron 14 of 15)	intron (NM_001025360, intron 14 of 15)	13290	NM_028875	74335	Mm.19082	NM_028875	ENSMUSG00000021287	Xrcc3	-	X-ray repair complementing defective repair in Chinese hamster cells 3	protein-coding
chr3	12246053	12246748	+	0	NA	Intergenic	B3A|SINE|B2	-402041	NR_040751	100038545	Mm.388494	NR_040751	ENSMUSG00000104015	Gm10745	-	predicted gene 10745	ncRNA
chr10	6151741	6152434	+	0	NA	Intergenic	Intergenic	-229687	NM_019958	56533	Mm.44606	NM_019958	ENSMUSG00000019775	Rgs17	6430507P11Rik|Rgsz2	regulator of G-protein signaling 17	protein-coding
chr11	76945086	76946407	+	0	NA	promoter-TSS (NM_178645)	promoter-TSS (NM_178645)	90	NM_178645	104184	Mm.399785	NM_178645	ENSMUSG00000020840	Blmh	AI035728|Bh|Bmh	bleomycin hydrolase	protein-coding
chr17	58919094	58919642	+	0	NA	intron (NM_027001, intron 8 of 12)	intron (NM_027001, intron 8 of 12)	72007	NM_027001	69239	Mm.246732	NM_027001	ENSMUSG00000024227	Pdzph1	2610034M16Rik|AV114557	PDZ and pleckstrin homology domains 1	protein-coding
chr13	26267258	26267819	+	0	NA	Intergenic	L1MB8|LINE|L1	44868	NR_045933	73576	Mm.45473	NR_045933	ENSMUSG00000084811	1700092E19Rik	-	RIKEN cDNA 1700092E19 gene	ncRNA
chr11	98342120	98343046	+	0	NA	Intergenic	Intergenic	-5823	NM_144828	19049	Mm.45372	NM_144828	ENSMUSG00000061718	Ppp1r1b	AU040756|DARPP-32|Darpp32	protein phosphatase 1, regulatory inhibitor subunit 1B	protein-coding
chr10	113946605	113947280	+	0	NA	Intergenic	Intergenic	854428	NM_146241	237553	Mm.445550	NM_146241	ENSMUSG00000050663	Trhde	9330155P21Rik	TRH-degrading enzyme	protein-coding
chr7	44326344	44327078	+	0	NA	intron (NM_001034115, intron 11 of 24)	intron (NM_001034115, intron 11 of 24)	16447	NM_001034115	243961	Mm.360368	NM_001034115	ENSMUSG00000038738	Shank1	-	SH3 and multiple ankyrin repeat domains 1	protein-coding
chr12	84408195	84409539	+	0	NA	promoter-TSS (NM_028377)	promoter-TSS (NM_028377)	162	NM_001026214	12499	Mm.10211	NM_007647	ENSMUSG00000021236	Entpd5	AI196558|AI987697|Cd39l4|ER-UDPase|NTPDase-5|NTPDase5|Pcph|mNTPase	ectonucleoside triphosphate diphosphohydrolase 5	protein-coding
chr2	156233414	156234147	+	0	NA	intron (NM_172674, intron 2 of 17)	intron (NM_172674, intron 2 of 17)	37133	NM_172674	228829	Mm.427078	NM_172674	ENSMUSG00000038116	Phf20	6820402O20Rik	PHD finger protein 20	protein-coding
chr7	139692765	139693420	+	0	NA	Intergenic	Intergenic	-9277	NM_001302546	212124	Mm.425507	NM_177212	ENSMUSG00000049571	Cfap46	9330101J02Rik|E030019B06Rik|Gm170|Ttc40	cilia and flagella associated protein 46	protein-coding
chr6	114840383	114841174	+	0	NA	intron (NM_001253717, intron 19 of 19)	MIR|SINE|MIR	81043	NM_177683	232334	Mm.268357	NM_177683	ENSMUSG00000030315	Vgll4	BC048841|VGL-4	vestigial like family member 4	protein-coding
chr10	19239954	19240617	+	0	NA	Intergenic	Intergenic	73047	NR_038022	100504265	Mm.383417	NR_038021		Gm20139	-	predicted gene, 20139	ncRNA
chr4	14775650	14776424	+	0	NA	intron (NM_028499, intron 1 of 7)	intron (NM_028499, intron 1 of 7)	20015	NM_028499	73314	Mm.52613	NM_028499	ENSMUSG00000023151	Lrrc69	1700034K16Rik	leucine rich repeat containing 69	protein-coding
chr3	134330884	134332134	+	0	NA	Intergenic	Intergenic	-90926	NR_035435	100316832		NR_035435	ENSMUSG00000084564	Mir1895	Mirn1895|mmu-mir-1895	microRNA 1895	ncRNA
chr1	112388585	112389265	+	0	NA	intron (NR_157044, intron 4 of 4)	B3|SINE|B2	27993	NR_157044	102635484		NR_157044		Gm32810	Gm18406	predicted gene, 32810	ncRNA
chr5	117574836	117575452	+	0	NA	intron (NM_001312914, intron 4 of 19)	intron (NM_001312914, intron 4 of 19)	161142	NM_001312914	333050	Mm.437947	NM_001034873	ENSMUSG00000061578	Ksr2	-	kinase suppressor of ras 2	protein-coding
chr5	140570460	140570760	+	0	NA	Intergenic	B3|SINE|B2	-5543	NM_030022	77998	Mm.160040	NM_030022	ENSMUSG00000036586	Grifin	E130101O17Rik	galectin-related inter-fiber protein	protein-coding
chr14	109941078	109941950	+	0	NA	Intergenic	MTB_Mm-int|LTR|ERVL-MaLR	813635	NM_175499	239250	Mm.49728	NM_175499	ENSMUSG00000045871	Slitrk6	4832410J21Rik|Sltk6	SLIT and NTRK-like family, member 6	protein-coding
chr9	43387487	43387832	+	0	NA	Intergenic	MER67C|LTR|ERV1	76896	NM_023655	72169	Mm.273277	NM_023655	ENSMUSG00000032013	Trim29	1110047J21Rik|2810431N19Rik|4732461M22Rik|AI119726	tripartite motif-containing 29	protein-coding
chr4	127859530	127859992	+	0	NA	Intergenic	Intergenic	111080	NM_001134733	635169	Mm.346755	NM_001134733	ENSMUSG00000028813	CK137956	-	cDNA sequence CK137956	protein-coding
chr7	126961778	126962461	+	0	NA	intron (NM_144926, intron 9 of 17)	intron (NM_144926, intron 9 of 17)	11584	NM_001252567	233878	Mm.283926	NM_144926	ENSMUSG00000030683	Sez6l2	AI835913|AW121566|BSRP-A|Psk1	seizure related 6 homolog like 2	protein-coding
chr11	97641559	97642518	+	0	NA	Intergenic	L2|LINE|L2	-12322	NM_175332	103551	Mm.24506	NM_175332	ENSMUSG00000043439	Epop	AA409164|AI413509|AW539173|E13|E130012A19Rik|esPRC2p48	elongin BC and polycomb repressive complex 2 associated protein	protein-coding
chr2	25943391	25944366	+	0	NA	intron (NM_001276361, intron 9 of 17)	intron (NM_001276361, intron 9 of 17)	39404	NM_001276359	227634	Mm.36834	NM_001115076	ENSMUSG00000026933	Camsap1	9530003A05Rik|C77823|PRO2405	calmodulin regulated spectrin-associated protein 1	protein-coding
chr15	44542940	44543583	+	0	NA	intron (NM_138674, intron 46 of 77)	intron (NM_138674, intron 46 of 77)	-75966	NM_001357690	55960	Mm.287896	NM_019480	ENSMUSG00000022339	Ebag9	AI835379|Rcas1	estrogen receptor-binding fragment-associated gene 9	protein-coding
chr5	120710346	120712067	+	0	NA	intron (NM_008052, intron 1 of 9)	CpG	463	NM_008052	14357	Mm.1645	NM_008052	ENSMUSG00000029603	Dtx1	Fxit1|mKIAA4160	deltex 1, E3 ubiquitin ligase	protein-coding
chr1	26407937	26408476	+	0	NA	Intergenic	Lx6|LINE|L1	279254	NM_001033764	210940	Mm.297614	NM_001033764	ENSMUSG00000073722	4931408C20Rik	-	RIKEN cDNA 4931408C20 gene	protein-coding
chr19	7301733	7302186	+	0	NA	intron (NM_001080388, intron 1 of 16)	intron (NM_001080388, intron 1 of 16)	-6512	NM_001080390	13728	Mm.258986	NM_007928	ENSMUSG00000024969	Mark2	EMK-1|Emk|Par-1|Par-1b	MAP/microtubule affinity regulating kinase 2	protein-coding
chr6	120274743	120275792	+	0	NA	intron (NM_198884, intron 1 of 19)	intron (NM_198884, intron 1 of 19)	19630	NM_198884	330406	Mm.321840	NM_198884	ENSMUSG00000041372	B4galnt3	AB114826|B4GalNAcT3|C330047A21	beta-1,4-N-acetyl-galactosaminyl transferase 3	protein-coding
chr2	64097835	64099203	+	0	NA	promoter-TSS (NM_021716)	promoter-TSS (NM_021716)	-481	NM_021716	60344	Mm.130769	NM_021716	ENSMUSG00000075324	Fign	Fgn|fi|fidget	fidgetin	protein-coding
chr11	76809417	76809997	+	0	NA	intron (NM_007754, intron 6 of 20)	intron (NM_007754, intron 6 of 20)	37301	NM_007754	12874	Mm.276736	NM_007754	ENSMUSG00000020841	Cpd	AA960140|AW322530|D830034L15Rik	carboxypeptidase D	protein-coding
chr10	55980035	55980718	+	0	NA	Intergenic	Intergenic	-126541	NM_001163833	73390	Mm.181475	NM_133751	ENSMUSG00000047669	Msl3l2	1700060H10Rik	MSL3 like 2	protein-coding
chr5	144988750	144989189	+	0	NA	intron (NM_001013774, intron 11 of 12)	RLTR31D_MM|LTR|ERVK	19082	NM_001347531	381686	Mm.332837	NM_001013774	ENSMUSG00000038770	Kpna7	AW146299|Gm1055	karyopherin alpha 7 (importin alpha 8)	protein-coding
chr2	119838441	119839208	+	0	NA	Intergenic	Intergenic	39310	NM_019392	22174	Mm.2901	NM_019392	ENSMUSG00000027298	Tyro3	AI323366|Brt|Dtk|Etk-2|Rse|Sky|TK19-2|Tif|etk2/tyro3|tk19-1	TYRO3 protein tyrosine kinase 3	protein-coding
chr4	24241757	24242770	+	0	NA	Intergenic	ID4_|SINE|ID	-254188	NM_199467	212377	Mm.120919	NM_199467	ENSMUSG00000045751	Mms22l	F730047E07Rik|Gm134	MMS22-like, DNA repair protein	protein-coding
chr9	44083580	44084160	+	0	NA	intron (NM_198092, intron 2 of 12)	intron (NM_198092, intron 2 of 12)	-1050	NM_198091	53376	Mm.272770	NM_016808	ENSMUSG00000032010	Usp2	B930035K21Rik|Ubp41	ubiquitin specific peptidase 2	protein-coding
chrX	133691653	133692384	+	0	NA	intron (NR_153117, intron 1 of 3)	intron (NR_153117, intron 1 of 3)	-3025	NM_001105245	279653	Mm.39738	NM_001105245	ENSMUSG00000051323	Pcdh19	B530002L05Rik|Gm717|mKIAA1313	protocadherin 19	protein-coding
chr13	119093179	119093973	+	0	NA	Intergenic	Intergenic	315435	NM_008710	18115	Mm.132584	NM_008710	ENSMUSG00000116207	Nnt	4930423F13Rik|AI323702|BB168308	nicotinamide nucleotide transhydrogenase	protein-coding
chr17	24904671	24904993	+	0	NA	intron (NM_001163450, intron 15 of 31)	intron (NM_001163450, intron 15 of 31)	8332	NM_019730	79059	Mm.430765	NM_019730	ENSMUSG00000073435	Nme3	1810009F08Rik|AI413736|DR-nm23|Ndk3|Nm23-DR|Nm23-M3	NME/NM23 nucleoside diphosphate kinase 3	protein-coding
chr4	31642073	31642731	+	0	NA	Intergenic	Intergenic	-321705	NM_009316	26409	Mm.258589	NM_009316	ENSMUSG00000028284	Map3k7	B430101B05|C87327|Tak1	mitogen-activated protein kinase kinase kinase 7	protein-coding
chr12	109925832	109926252	+	0	NA	Intergenic	Intergenic	178164	NR_037233	100499517		NR_037233	ENSMUSG00000093351	Mir3072	mir-3072|mmu-mir-3072	microRNA 3072	ncRNA
chr1	107000366	107000980	+	0	NA	exon (NM_172852, exon 8 of 8)	exon (NM_172852, exon 8 of 8)	19689	NM_172852	241196	Mm.110886	NM_172852	ENSMUSG00000048775	Serpinb13	5430417G24|HUR7|HURPIN|PI13|headpin	serine (or cysteine) peptidase inhibitor, clade B (ovalbumin), member 13	protein-coding
chr14	58678232	58678728	+	0	NA	Intergenic	Intergenic	464413	NM_026461	67932	Mm.65550	NM_026461	ENSMUSG00000021977	1700129C05Rik	-	RIKEN cDNA 1700129C05 gene	protein-coding
chr4	134081571	134082480	+	0	NA	exon (NM_001162970, exon 12 of 20)	exon (NM_001162970, exon 12 of 20)	13048	NM_013706	23833	Mm.24130	NM_013706	ENSMUSG00000000682	Cd52	AI463198|B7|B7-Ag|CAMPATH-1|CLS1|MB7	CD52 antigen	protein-coding
chr5	137660117	137660342	+	0	NA	intron (NM_001303266, intron 6 of 12)	intron (NM_001303266, intron 6 of 12)	-14515	NM_010571	16369	Mm.24486	NM_010571	ENSMUSG00000047182	Irs3	AA408304	insulin receptor substrate 3	protein-coding
chr2	32610598	32611044	+	0	NA	intron (NM_001025310, intron 2 of 5)	intron (NM_001025310, intron 2 of 5)	3836	NM_001289547	50935	Mm.88831	NM_016973	ENSMUSG00000026811	St6galnac6	ST6GalNAcVI|Siat7f	ST6 (alpha-N-acetyl-neuraminyl-2,3-beta-galactosyl-1,3)-N-acetylgalactosaminide alpha-2,6-sialyltransferase 6	protein-coding
chr8	70672892	70673877	+	0	NA	5' UTR (NM_015816, exon 1 of 5)	5' UTR (NM_015816, exon 1 of 5)	153	NM_001359042	50783	Mm.248188	NM_015816	ENSMUSG00000031848	Lsm4	-	LSM4 homolog, U6 small nuclear RNA and mRNA degradation associated	protein-coding
chr15	77332293	77332793	+	0	NA	Intergenic	Intergenic	-25490	NM_053104	93686	Mm.202774	NM_053104	ENSMUSG00000033565	Rbfox2	Fbm2|Fxh|Hrnbp2|Rbm9	RNA binding protein, fox-1 homolog (C. elegans) 2	protein-coding
chr11	100440579	100441574	+	0	NA	promoter-TSS (NM_025727)	promoter-TSS (NM_025727)	22	NM_001102650	68106	Mm.28738	NM_026561	ENSMUSG00000017176	Nt5c3b	2610037D24Rik|AI841843|C330027I04Rik|Nt5c3l	5'-nucleotidase, cytosolic IIIB	protein-coding
chr11	103217757	103218767	+	0	NA	intron (NM_177801, intron 1 of 4)	intron (NM_177801, intron 1 of 4)	170	NM_177801	328019	Mm.189646	NM_177801	ENSMUSG00000044787	Spata32	4933400C05Rik|VAD1.2	spermatogenesis associated 32	protein-coding
chr7	144407508	144408210	+	0	NA	intron (NM_001081370, intron 8 of 10)	intron (NM_001081370, intron 8 of 10)	63076	NM_007803	13043	Mm.205601	NM_007803	ENSMUSG00000031078	Cttn	1110020L01Rik|Ems1	cortactin	protein-coding
chr17	34109378	34110933	+	0	NA	Intergenic	Intergenic	9745	NR_037970	14312	Mm.3444	NM_010238	ENSMUSG00000024335	Brd2	AW228947|D17H6S113E|Frg-1|Fsrg-1|Fsrg1|Nat|Ring3|Rnf3|mKIAA4005	bromodomain containing 2	protein-coding
chr11	69672175	69672708	+	0	NA	promoter-TSS (NM_001159375)	promoter-TSS (NM_001159375)	-18	NM_001159375	13681	Mm.26680	NM_144958	ENSMUSG00000059796	Eif4a1	BM-010|Ddx2a|Eif4	eukaryotic translation initiation factor 4A1	protein-coding
chr15	101373154	101373945	+	0	NA	Intergenic	Intergenic	-3387	NM_028770	74127	Mm.440055	NM_028770	ENSMUSG00000037185	Krt80	1200016G03Rik|2310041I20Rik|CK-80|K80|Kb20	keratin 80	protein-coding
chr10	80774370	80775234	+	0	NA	intron (NM_199322, intron 7 of 27)	intron (NM_199322, intron 7 of 27)	19599	NM_199322	208266	Mm.152371	NM_199322	ENSMUSG00000061589	Dot1l	A630076O07|AW907654|Dot1|KMT4|mDot1	DOT1-like, histone H3 methyltransferase (S. cerevisiae)	protein-coding
chr5	35119883	35120418	+	0	NA	Intergenic	Intergenic	-14451	NM_013587	16976	Mm.277661	NM_013587	ENSMUSG00000029103	Lrpap1	AA617339|AI790446|AU042172|C77774|HBP44|RAP	low density lipoprotein receptor-related protein associated protein 1	protein-coding
chr9	61867452	61868146	+	0	NA	Intergenic	Intergenic	46711	NM_018853	56040	Mm.3158	NM_018853	ENSMUSG00000007892	Rplp1	2410042H16Rik|Arpp1|C430017H15Rik	ribosomal protein, large, P1	protein-coding
chr5	149334322	149335431	+	0	NA	Intergenic	Intergenic	69872	NM_001308462	11690	Mm.19844	NM_009663	ENSMUSG00000060063	Alox5ap	Flap	arachidonate 5-lipoxygenase activating protein	protein-coding
chr4	125396863	125397599	+	0	NA	Intergenic	Intergenic	-93465	NM_001081097	14807	Mm.40896	NM_001081097	ENSMUSG00000001985	Grik3	9630027E11|GluK3|GluR7-3|Glur-7|Glur7	glutamate receptor, ionotropic, kainate 3	protein-coding
chr11	70605070	70605466	+	0	NA	intron (NM_001045964, intron 12 of 32)	intron (NM_001045964, intron 12 of 32)	-10626	NM_001145537	668433	Mm.425687	NM_001145537	ENSMUSG00000087279	4930544D05Rik	-	RIKEN cDNA 4930544D05 gene	protein-coding
chr1	31448972	31449619	+	0	NA	Intergenic	Intergenic	184448	NR_015347	226957	Mm.25966	NR_015347		Gm4850	EG226957	THO complex 4 pseudogene	pseudo
chr1	75179470	75180701	+	0	NA	TTS (NM_001288612)	TTS (NM_001288612)	307	NM_023732	74104	Mm.28663	NM_023732	ENSMUSG00000026198	Abcb6	1200005B17Rik	ATP-binding cassette, sub-family B (MDR/TAP), member 6	protein-coding
chr7	65155667	65156999	+	0	NA	5' UTR (NM_183087, exon 1 of 10)	5' UTR (NM_183087, exon 1 of 10)	195	NM_183087	70638	Mm.441986	NM_183087	ENSMUSG00000030518	Fam189a1	5730507A09Rik|AW047451	family with sequence similarity 189, member A1	protein-coding
chr19	3526206	3526894	+	0	NA	intron (NM_001360429, intron 3 of 24)	intron (NM_001360429, intron 3 of 24)	49199	NM_001360429	52036	Mm.284686	NM_028999	ENSMUSG00000024908	Ppp6r3	4930528G08Rik|9130026N02Rik|D19Bwg1430e|D19Ertd703e|Pp6r3|Ppcs3|Pptcs3|Sapl|Saps3|mKIAA1558	protein phosphatase 6, regulatory subunit 3	protein-coding
chr14	116651892	116652709	+	0	NA	Intergenic	Intergenic	-272997	NM_011821	23888	Mm.440025	NM_011821	ENSMUSG00000058571	Gpc6	-	glypican 6	protein-coding
chr13	63158499	63159063	+	0	NA	intron (NM_001289926, intron 6 of 15)	IAPEz-int|LTR|ERVK	-81248	NR_110520	72061	Mm.188105	NM_028079	ENSMUSG00000021458	Aopep	2010111I01Rik|2300006M17Rik|AP-O|AW742919|ApO|mir-23b|mir-24-1|mir-27b	aminopeptidase O	protein-coding
chr2	14107840	14108270	+	0	NA	intron (NM_011484, intron 2 of 13)	MTD|LTR|ERVL-MaLR	33955	NM_011484	20844	Mm.273174	NM_011484	ENSMUSG00000026718	Stam	STAM1	signal transducing adaptor molecule (SH3 domain and ITAM motif) 1	protein-coding
chr2	164878559	164880375	+	0	NA	promoter-TSS (NM_146129)	promoter-TSS (NM_146129)	99	NM_146129	228866	Mm.241134	NM_146129	ENSMUSG00000039849	Pcif1	2310022K11Rik|C20orf67|CAPAM|F730014I05Rik	PDX1 C-terminal inhibiting factor 1	protein-coding
chr1	36807901	36808474	+	0	NA	exon (NM_018872, exon 31 of 41)	exon (NM_018872, exon 31 of 41)	29203	NM_001289612	22637	Mm.8038	NM_009539	ENSMUSG00000026117	Zap70	Srk|ZAP-70|mrtle|mur	zeta-chain (TCR) associated protein kinase	protein-coding
chr12	65548142	65548889	+	0	NA	Intergenic	Intergenic	322998	NM_027614	70948	Mm.219475	NM_027614	ENSMUSG00000035560	Wdr20rt	4921538B03Rik|4930427E19Rik|Wdr20|Wdr20b	WD repeat domain 20, retrogene	protein-coding
chr10	79959835	79960533	+	0	NA	promoter-TSS (NM_175450)	promoter-TSS (NM_175450)	32	NM_175450	216156	Mm.35828	NM_175450	ENSMUSG00000035754	Wdr18	2310012I10Rik|AU044733|AW122032	WD repeat domain 18	protein-coding
chr14	26913568	26914212	+	0	NA	intron (NM_001170748, intron 8 of 9)	intron (NM_001170748, intron 8 of 9)	19276	NM_001170748	142687	Mm.138259	NM_080856	ENSMUSG00000021898	Asb14	Asb-14	ankyrin repeat and SOCS box-containing 14	protein-coding
chr18	53326643	53327503	+	0	NA	intron (NM_029394, intron 1 of 6)	intron (NM_029394, intron 1 of 6)	81448	NM_001370761	69226	Mm.32414	NM_029394	ENSMUSG00000024535	Snx24	2810011K15Rik|5730433I16Rik|AI451341	sorting nexing 24	protein-coding
chr3	89378219	89379051	+	0	NA	TTS (NM_001370853)	TTS (NM_001370853)	9036	NM_001355212	22724	Mm.262184	NM_009565	ENSMUSG00000028042	Zbtb7b	Thpok|Zfp67|c-Krox	zinc finger and BTB domain containing 7B	protein-coding
chr7	27552807	27553576	+	0	NA	promoter-TSS (NM_175107)	promoter-TSS (NM_175107)	27	NM_001317355	18807	Mm.6483	NM_011116	ENSMUSG00000003363	Pld3	Sam-9	phospholipase D family, member 3	protein-coding
chr4	131940935	131941339	+	0	NA	intron (NM_183428, intron 16 of 20)	intron (NM_183428, intron 16 of 20)	19366	NM_001201367	623230	Mm.421179	NM_001201367	ENSMUSG00000070720	Tmem200b	EG623230	transmembrane protein 200B	protein-coding
chr7	141877056	141877740	+	0	NA	Intergenic	Intergenic	25063	NM_001347562	54473	Mm.103551	NM_023764	ENSMUSG00000025139	Tollip	4930403G24Rik|4931428G15Rik	toll interacting protein	protein-coding
chr5	121593211	121594362	+	0	NA	promoter-TSS (NM_009656)	promoter-TSS (NM_009656)	38	NM_001308450	11669	Mm.284446	NM_009656	ENSMUSG00000029455	Aldh2	AHD-M1|ALDH-E2|ALDHI|Ahd-5|Ahd5	aldehyde dehydrogenase 2, mitochondrial	protein-coding
chr5	133586606	133586835	+	0	NA	Intergenic	Cheshire|DNA|hAT-Charlie	-513028	NM_030719	80909	Mm.45218	NM_030719	ENSMUSG00000015944	Castor2	7530428J21Rik|AW742413|Gats|Gatsl1|Gatsl2	cytosolic arginine sensor for mTORC1 subunit 2	protein-coding
chr7	46816177	46816871	+	0	NA	intron (NM_001360076, intron 13 of 15)	intron (NM_001360076, intron 13 of 15)	19853	NM_001291075	14884	Mm.22700	NM_008186	ENSMUSG00000006599	Gtf2h1	62kDa|AW743425|AW822074|BTF2 p62|C77871|p62	general transcription factor II H, polypeptide 1	protein-coding
chr17	24506002	24507320	+	0	NA	exon (NM_027937, exon 19 of 20)	exon (NM_027937, exon 19 of 20)	17878	NM_027937	268932	Mm.70989	NM_027937	ENSMUSG00000033597	Caskin1	3300002N10Rik|C130061I24|C630036E02Rik|mKIAA1306	CASK interacting protein 1	protein-coding
chr8	121636096	121637030	+	0	NA	intron (NM_080855, intron 1 of 12)	intron (NM_080855, intron 1 of 12)	15370	NM_080855	142682	Mm.103202	NM_080855	ENSMUSG00000061410	Zcchc14	AA792890|BDG29	zinc finger, CCHC domain containing 14	protein-coding
chr4	138788263	138788686	+	0	NA	Intergenic	Intergenic	12739	NM_011109	18782	Mm.71913	NM_011109	ENSMUSG00000041202	Pla2g2d	GIID|GIID sPLA2|PLA2IID|Splash|mGIID|sPLA2-IID	phospholipase A2, group IID	protein-coding
chr12	91972190	91972633	+	0	NA	Intergenic	MER99|DNA|hAT?	-123254	NM_001039089	20338	Mm.250605	NM_011344	ENSMUSG00000020964	Sel1l	AW493766|Sel1h|mKIAA4137	sel-1 suppressor of lin-12-like (C. elegans)	protein-coding
chr17	6106107	6107579	+	0	NA	promoter-TSS (NM_001103181)	promoter-TSS (NM_001103181)	13	NM_001103181	68842	Mm.449307	NM_054040	ENSMUSG00000034377	Tulp4	1110057P05Rik|2210038L17Rik|Tusp	tubby like protein 4	protein-coding
chr2	167309396	167309670	+	0	NA	intron (NM_019835, intron 2 of 8)	intron (NM_019835, intron 2 of 8)	39645	NM_019835	56336	Mm.200886	NM_019835	ENSMUSG00000017929	B4galt5	9430078I07Rik|AW049941|AW539721	UDP-Gal:betaGlcNAc beta 1,4-galactosyltransferase, polypeptide 5	protein-coding
chr1	70772078	70772422	+	0	NA	intron (NM_177164, intron 3 of 3)	intron (NM_177164, intron 3 of 3)	46535	NM_001310658	320460	Mm.360649	NM_177164	ENSMUSG00000045648	Vwc2l	A830006F12Rik|Brl	von Willebrand factor C domain-containing protein 2-like	protein-coding
chr8	13538852	13539369	+	0	NA	Intergenic	Intergenic	23351	NM_025601	66501	Mm.46136	NM_025601	ENSMUSG00000031452	1700029H14Rik	-	RIKEN cDNA 1700029H14 gene	protein-coding
chr11	102624891	102625461	+	0	NA	promoter-TSS (NR_033474)	promoter-TSS (NR_033474)	-760	NR_033474	77132	Mm.194729	NR_033474		2810433D01Rik	-	RIKEN cDNA 2810433D01 gene	ncRNA
chr3	117486376	117487693	+	0	NA	Intergenic	Intergenic	-88193	NM_029425	75769	Mm.72187	NM_029425	ENSMUSG00000033342	Plppr5	4833424O15Rik|Lppr5|PRG-5|Pap2d	phospholipid phosphatase related 5	protein-coding
chr12	96579584	96580025	+	0	NA	Intergenic	Intergenic	-532582	NR_103800	69423	Mm.46121	NM_027076		1700019M22Rik	-	NFX-like protein	pseudo
chr4	148173929	148174780	+	0	NA	Intergenic	Intergenic	13686	NM_176848	230904	Mm.262287	NM_176848	ENSMUSG00000041556	Fbxo2	FBG1|FBX2|Fbs1|Fbs2|NFB42|Prpl4	F-box protein 2	protein-coding
chr9	48735592	48736007	+	0	NA	intron (NM_001033324, intron 3 of 6)	intron (NM_001033324, intron 3 of 6)	100142	NM_001033324	235320	Mm.457803	NM_001033324	ENSMUSG00000066687	Zbtb16	AI467657|PLZF|Zfp145|lu	zinc finger and BTB domain containing 16	protein-coding
chr10	26903696	26904435	+	0	NA	intron (NM_176837, intron 12 of 14)	MERVL_2A-int|LTR|ERVL	131553	NM_176837	73910	Mm.356496	NM_176837	ENSMUSG00000039031	Arhgap18	4833419J07Rik|AI314906|AI843501	Rho GTPase activating protein 18	protein-coding
chr16	81613372	81613931	+	0	NA	intron (NM_001113208, intron 15 of 17)	intron (NM_001113208, intron 15 of 17)	412954	NM_001113208	17968	Mm.433941	NM_010954	ENSMUSG00000022762	Ncam2	Ncam-2|Ocam|RNCAM	neural cell adhesion molecule 2	protein-coding
chr14	114547841	114548619	+	0	NA	Intergenic	Intergenic	-283735	NR_045661	75822	Mm.410813	NR_045661	ENSMUSG00000115320	4930524C18Rik	-	RIKEN cDNA 4930524C18 gene	ncRNA
chr4	127168292	127169996	+	0	NA	promoter-TSS (NM_198618)	promoter-TSS (NM_198618)	-60	NM_198618	242667	Mm.331885	NM_198618	ENSMUSG00000042388	Dlgap3	BC058433|DAP-3|DAP3|Prpl8|Sapap3	DLG associated protein 3	protein-coding
chr6	115126469	115126689	+	0	NA	Intergenic	Intergenic	8256	NR_132436	100503783	Mm.102390	NR_132436	ENSMUSG00000097486	Gm17733	-	predicted gene, 17733	ncRNA
chr17	35666781	35668014	+	0	NA	TTS (NM_010364)	TTS (NM_010364)	195	NM_175137	68915	Mm.32002	NM_175137	ENSMUSG00000038838	Vars2	1190004I24Rik|Vars2l|mKIAA1885	valyl-tRNA synthetase 2, mitochondrial	protein-coding
chr7	132174307	132175125	+	0	NA	Intergenic	Intergenic	-19975	NM_018867	55987	Mm.471654	NM_018867	ENSMUSG00000030862	Cpxm2	4632435C11Rik|CPX-2|Cpx2	carboxypeptidase X 2 (M14 family)	protein-coding
chr15	79176697	79177334	+	0	NA	intron (NR_029470, intron 2 of 4)	intron (NR_029470, intron 2 of 4)	10949	NR_029470	100041655	Mm.483310	NR_029470	ENSMUSG00000075555	Gm10863	-	predicted gene 10863	ncRNA
chr16	17556947	17557297	+	0	NA	intron (NM_001145435, intron 4 of 7)	B3A|SINE|B2	4125	NM_029053	74685	Mm.38634	NM_029053	ENSMUSG00000022759	Lrrc74b	4930451C15Rik|mCG12354|mCP17390	leucine rich repeat containing 74B	protein-coding
chr3	68419686	68420427	+	0	NA	intron (NM_001113420, intron 1 of 6)	intron (NM_001113420, intron 1 of 6)	-48127	NM_001282045	30953	Mm.331064	NM_013928	ENSMUSG00000027777	Schip1	Nf2ip|Schip-1	schwannomin interacting protein 1	protein-coding
chr17	34135258	34135936	+	0	NA	5' UTR (NM_001360530, exon 2 of 6)	5' UTR (NM_001360530, exon 2 of 6)	-7632	NR_160896	15000	Mm.195060	NM_010388	ENSMUSG00000037548	H2-DMb2	H-2Mb2|H2-Mb2	histocompatibility 2, class II, locus Mb2	protein-coding
chr7	125763375	125763763	+	0	NA	intron (NM_001358287, intron 4 of 26)	intron (NM_001358287, intron 4 of 26)	55699	NM_001358287	233865	Mm.274389	NM_001081022	ENSMUSG00000032743	D430042O09Rik	Kiaa0556	RIKEN cDNA D430042O09 gene	protein-coding
chr11	16001957	16002511	+	0	NA	Intergenic	Charlie1a|DNA|hAT-Charlie	-255508	NM_145967	211739	Mm.284015	NM_145967	ENSMUSG00000048834	Vstm2a	Vstm2	V-set and transmembrane domain containing 2A	protein-coding
chrX	49545573	49546088	+	0	NA	Intergenic	Intergenic	75380	NM_001081123	75404	Mm.44305	NM_001081123	ENSMUSG00000036198	Arhgap36	1100001E04Rik|rho-gap	Rho GTPase activating protein 36	protein-coding
chr5	112040676	112041733	+	0	NA	Intergenic	Intergenic	-165559	NR_045377	75569	Mm.243721	NR_045377	ENSMUSG00000101683	1700028D13Rik	-	RIKEN cDNA 1700028D13 gene	ncRNA
chr7	19319450	19320512	+	0	NA	Intergenic	CpG	-9936	NM_008036	14282	Mm.248335	NM_008036	ENSMUSG00000003545	Fosb	-	FBJ osteosarcoma oncogene B	protein-coding
chr16	86222819	86223686	+	0	NA	Intergenic	Intergenic	-322127	NM_011782	23794	Mm.112933	NM_011782	ENSMUSG00000022894	Adamts5	9530092O11Rik|ADAM-TS5|ADAMTS1|ADAMTS11|ADMP-2|AI481094|ASMP-2	a disintegrin-like and metallopeptidase (reprolysin type) with thrombospondin type 1 motif, 5 (aggrecanase-2)	protein-coding
chr6	21794780	21795421	+	0	NA	intron (NM_001363814, intron 6 of 6)	intron (NM_001363814, intron 6 of 6)	57067	NM_001363814	269831	Mm.21950	NM_173007	ENSMUSG00000029669	Tspan12	9030619E17|AI426782|AI663988|AW111457|Tm4sf12	tetraspanin 12	protein-coding
chr6	7366996	7367738	+	0	NA	Intergenic	Intergenic	-187694	NM_009311	21333	Mm.1440	NM_009311	ENSMUSG00000061762	Tac1	4930528L02Rik|NK-1|NK1|Nkna|PPT-A|PPTA|SP	tachykinin 1	protein-coding
chr8	54486337	54487534	+	0	NA	Intergenic	Intergenic	43063	NM_029701	76687	Mm.86437	NM_029701	ENSMUSG00000054408	Spcs3	1810011E08Rik|SPC22/23	signal peptidase complex subunit 3 homolog (S. cerevisiae)	protein-coding
chr16	56928017	56928385	+	0	NA	promoter-TSS (NM_001347042)	promoter-TSS (NM_001347042)	-262	NM_001347042	100503609	Mm.457937	NM_001347042	ENSMUSG00000109588	Lnp1	Gm19797	leukemia NUP98 fusion partner 1	protein-coding
chr13	45030901	45031797	+	0	NA	Intergenic	Intergenic	-29253	NM_025772	94245	Mm.352311	NM_025772	ENSMUSG00000057531	Dtnbp1	5430437B18Rik|AW048963|Bloc1s8|dysbindin|sdy	dystrobrevin binding protein 1	protein-coding
chr4	136840988	136841674	+	0	NA	Intergenic	Intergenic	-5319	NM_010142	13844	Mm.250981	NM_010142	ENSMUSG00000028664	Ephb2	Cek5|Drt|ETECK|Erk|Hek5|Nuk|Prkm5|Qek5|Sek3|Tyro5	Eph receptor B2	protein-coding
chr11	98738424	98738935	+	0	NA	Intergenic	Intergenic	-3106	NM_178060	21833	Mm.265917	NM_178060	ENSMUSG00000058756	Thra	6430529J03Rik|AW259572|Erba|Nr1a1|Rvr|T3R[a]|T3Ralpha|Thra1|Thra2|c-erbA-1|c-erbA-alpha|c-erbAalpha	thyroid hormone receptor alpha	protein-coding
chr4	134713900	134714394	+	0	NA	Intergenic	MLT1I|LTR|ERVL-MaLR	-9857	NM_207237	230815	Mm.18905	NM_207237	ENSMUSG00000037306	Man1c1	AI593348	mannosidase, alpha, class 1C, member 1	protein-coding
chr4	134401993	134402306	+	0	NA	promoter-TSS (NM_001285877)	promoter-TSS (NM_001285877)	-763	NM_001285874	100163	Mm.22116	NM_133880	ENSMUSG00000037366	Pafah2	2310074E22Rik|AI507170	platelet-activating factor acetylhydrolase 2	protein-coding
chrX	5626762	5627194	+	0	NA	Intergenic	Intergenic	-42089	NM_001085523	434725	Mm.457958	NM_001085523	ENSMUSG00000095814	Btbd35f7	Gm14374	BTB domain containing 35, family member 7	protein-coding
chr12	37726460	37727017	+	0	NA	Intergenic	RMER19A|LTR|ERVK	-153436	NM_001361688	217480	Mm.126525	NM_178681	ENSMUSG00000036095	Dgkb	6430574F24|90kda|C630029D13Rik|DAGK2|DGK|DGK-beta|mKIAA0718	diacylglycerol kinase, beta	protein-coding
chr7	44892217	44892924	+	0	NA	promoter-TSS (NM_001331206)	promoter-TSS (NM_001331206)	-146	NM_001331208	75613	Mm.157778	NM_029365	ENSMUSG00000002968	Med25	2610034E13Rik|2610529E18Rik|ESTM2	mediator complex subunit 25	protein-coding
chr8	97968092	97968963	+	0	NA	Intergenic	Intergenic	-1043360	NR_110579	100873092	Mm.414599	NR_110579	ENSMUSG00000089819	Gm15679	-	predicted gene 15679	ncRNA
chr11	53229050	53229545	+	0	NA	Intergenic	Intergenic	71182	NM_008300	15525	Mm.239865	NM_008300	ENSMUSG00000020361	Hspa4	70kDa|AI317151|APG-2|Hsp110|Hsp70RY|mKIAA4025	heat shock protein 4	protein-coding
chr4	106839897	106840811	+	0	NA	Intergenic	CpG	-35347	NM_001347159	329910	Mm.222956	NM_025590	ENSMUSG00000034853	Acot11	1110020M10Rik|2010309H15Rik|AW060409|BFIT|BFIT1|Thea|Them1|mKIAA0707	acyl-CoA thioesterase 11	protein-coding
chr17	27005458	27006390	+	0	NA	Intergenic	Intergenic	-12111	NM_001251881	70772	Mm.440437	NM_027544	ENSMUSG00000048731	Ggnbp1	0610031G08Rik|mdf	gametogenetin binding protein 1	protein-coding
chr5	143975117	143975831	+	0	NA	Intergenic	RMER1A|Other|Other	39379	NM_177682	231874	Mm.320432	NM_177682	ENSMUSG00000029617	Ccz1	AU022870	CCZ1 vacuolar protein trafficking and biogenesis associated	protein-coding
chr6	22716256	22717593	+	0	NA	Intergenic	Intergenic	-158578	NM_001311064	19283	Mm.41639	NM_011219	ENSMUSG00000068748	Ptprz1	AI850339|DSD-1-PG|PTPbeta|PTPzeta|Ptprz|Ptpz|R-PTP-zeta|RPTPz|Rptpbeta	protein tyrosine phosphatase, receptor type Z, polypeptide 1	protein-coding
chr19	4646382	4646628	+	0	NA	intron (NM_001033447, intron 10 of 14)	ID_B1|SINE|B4	-20860	NR_160878	19671	Mm.391143	NM_023131	ENSMUSG00000024889	Rce1	D19Ertd283e|D19Ertd98e	Ras converting CAAX endopeptidase 1	protein-coding
chr4	152296845	152297824	+	0	NA	promoter-TSS (NR_161306)	promoter-TSS (NR_161306)	120	NR_161302	57295	Mm.277464	NM_133788	ENSMUSG00000039662	Icmt	1700008E11Rik|C80758|Gm13095|HSTE14|PPMT|STE14|pcCMT	isoprenylcysteine carboxyl methyltransferase	protein-coding
chr13	56790565	56791177	+	0	NA	intron (NM_012035, intron 7 of 11)	intron (NM_012035, intron 7 of 11)	87203	NM_001164042	17129	Mm.272920	NM_008541	ENSMUSG00000021540	Smad5	1110051M15Rik|AI451355|Dwf-C|Madh5|MusMLP	SMAD family member 5	protein-coding
chr4	141878936	141879503	+	0	NA	Intergenic	Intergenic	-4299	NM_025994	27984	Mm.395598	NM_025994	ENSMUSG00000040659	Efhd2	2600015J22Rik|AA408606|D4Wsu27e	EF hand domain containing 2	protein-coding
chr5	9227241	9227987	+	0	NA	Intergenic	L1M5|LINE|L1	-38504	NM_001359884	231014	Mm.130063	NM_172706	ENSMUSG00000056004	9330182L06Rik	Eig121l	RIKEN cDNA 9330182L06 gene	protein-coding
chr1	132745524	132746729	+	0	NA	Intergenic	Intergenic	-4329	NM_001160317	269116	Mm.326702	NM_182716	ENSMUSG00000026442	Nfasc	AA387016|D430023G06Rik|NF|mKIAA0756	neurofascin	protein-coding
chr16	32992125	32992898	+	0	NA	intron (NM_001310672, intron 14 of 19)	B3|SINE|B2	63675	NM_178378	69707	Mm.227918	NM_178378	ENSMUSG00000035578	Iqcg	2400003L07Rik|G1-374-12|esgd12d|repro1|stubby12d	IQ motif containing G	protein-coding
chr12	36314058	36314847	+	0	NA	exon (NM_025312, exon 1 of 2)	exon (NM_025312, exon 1 of 2)	283	NM_025312	66042	Mm.43375	NM_025312	ENSMUSG00000036169	Sostdc1	0610006G05Rik|Sostl|USAG-1|Wise|ectodin	sclerostin domain containing 1	protein-coding
chr13	62623791	62624667	+	0	NA	promoter-TSS (NM_173381)	promoter-TSS (NM_173381)	-47	NM_173381	211378	Mm.247448	NM_173381	ENSMUSG00000072066	6720489N17Rik	9330128I06	RIKEN cDNA 6720489N17 gene	protein-coding
chr5	34761071	34762641	+	0	NA	5' UTR (NM_010414, exon 1 of 67)	5' UTR (NM_010414, exon 1 of 67)	116	NM_010414	15194	Mm.209071	NM_010414	ENSMUSG00000029104	Htt	AI256365|C430023I11Rik|Hd|Hdh|IT15	huntingtin	protein-coding
chr16	18218968	18220593	+	0	NA	TTS (NM_172151)	TTS (NM_172151)	1901	NM_001370887	102638083		NM_001370887	ENSMUSG00000090777	Ccdc188	EG665975|Gm7873	coiled-coil domain containing 188	protein-coding
chr13	16528931	16529543	+	0	NA	Intergenic	Intergenic	-505814	NR_155430	100503142	Mm.359204	NR_155430		B230303A05Rik	B230303A05|EG328191	U1 small nuclear ribonucleoprotein 1C pseudogene	pseudo
chr6	104756021	104756686	+	0	NA	intron (NM_017383, intron 7 of 22)	intron (NM_017383, intron 7 of 22)	263309	NM_017383	53870	Mm.321671	NM_017383	ENSMUSG00000030092	Cntn6	NB-3	contactin 6	protein-coding
chr15	73747744	73748401	+	0	NA	promoter-TSS (NM_008975)	promoter-TSS (NM_008975)	46	NM_008975	19245	Mm.390807	NM_008975	ENSMUSG00000059895	Ptp4a3	AV088979|Prl-3|pPtp4a3	protein tyrosine phosphatase 4a3	protein-coding
chr17	27358094	27358475	+	0	NA	TTS (NR_106077)	TTS (NR_106077)	187	NR_106077	102466228		NR_106077	ENSMUSG00000106215	Mir7218	mmu-mir-7218	microRNA 7218	ncRNA
chr6	64676361	64677384	+	0	NA	intron (NM_001370966, intron 15 of 15)	B3A|SINE|B2	-52253	NM_007500	11921	Mm.57229	NM_007500	ENSMUSG00000073043	Atoh1	Hath1|MATH-1|Math1|bHLHa14	atonal bHLH transcription factor 1	protein-coding
chr17	46467844	46468189	+	0	NA	intron (NM_001162864, intron 12 of 14)	intron (NM_001162864, intron 12 of 14)	19659	NM_001162864	106763	Mm.297613	NM_175351	ENSMUSG00000015599	Ttbk1	AU017937|AW048023|C330008L01Rik	tau tubulin kinase 1	protein-coding
chr3	46174410	46175016	+	0	NA	Intergenic	Intergenic	273228	NM_001101479	241989	Mm.119234	NM_001101479	ENSMUSG00000090919	Pabpc4l	C330050A14Rik|EG241989	poly(A) binding protein, cytoplasmic 4-like	protein-coding
chr12	49449234	49449865	+	0	NA	Intergenic	Intergenic	31313	NR_045472	69054	Mm.417838	NR_045472	ENSMUSG00000100844	1810007C17Rik	-	RIKEN cDNA 1810007C17 gene	ncRNA
chr6	58644333	58644911	+	0	NA	intron (NM_011920, intron 1 of 15)	intron (NM_011920, intron 1 of 15)	47950	NM_011920	26357	Mm.333096	NM_011920	ENSMUSG00000029802	Abcg2	ABC15|ABCP|AI428558|BCRP|Bcrp1|MXR|MXR1	ATP binding cassette subfamily G member 2 (Junior blood group)	protein-coding
chr2	74398909	74399438	+	0	NA	Intergenic	MERVL-int|LTR|ERVL	-91456	NR_040501	73962	Mm.50289	NR_040501	ENSMUSG00000085405	4930441J16Rik	Astx1a|Astx1b|Astx1c	RIKEN cDNA 4930441J16 gene	ncRNA
chr11	7451699	7452211	+	0	NA	Intergenic	Intergenic	-238032	NM_008343	16009	Mm.29254	NM_008343	ENSMUSG00000020427	Igfbp3	AI649005|IGFBP-3|IGgfbp3	insulin-like growth factor binding protein 3	protein-coding
chr4	153425979	153426564	+	0	NA	intron (NM_001099299, intron 2 of 5)	intron (NM_001099299, intron 2 of 5)	56559	NM_001099299	230959	Mm.318874	NM_001099299	ENSMUSG00000039546	Ajap1	Gm573	adherens junction associated protein 1	protein-coding
chr7	45123970	45124680	+	0	NA	promoter-TSS (NM_013725)	promoter-TSS (NM_013725)	64	NM_013725	27207	Mm.196538	NM_013725	ENSMUSG00000003429	Rps11	-	ribosomal protein S11	protein-coding
chr10	30003095	30003549	+	0	NA	Intergenic	Intergenic	197218	NM_001109747	66311	Mm.251779	NM_001109747	ENSMUSG00000075266	Cenpw	2610036L11Rik|Cug2	centromere protein W	protein-coding
chr5	70323680	70324112	+	0	NA	Intergenic	Lx8|LINE|L1	518721	NM_010252	14405	Mm.255292	NM_010252	ENSMUSG00000001260	Gabrg1	GabaA|GabaA/BZ	gamma-aminobutyric acid (GABA) A receptor, subunit gamma 1	protein-coding
chr5	55879980	55880709	+	0	NA	Intergenic	Intergenic	1530352	NR_038045	330086	Mm.254449	NM_177871	ENSMUSG00000105912	Gm10440	D130065D13	predicted gene 10440	ncRNA
chr4	129542306	129543144	+	0	NA	promoter-TSS (NM_008228)	promoter-TSS (NM_008228)	-79	NM_008228	433759	Mm.202504	NM_008228	ENSMUSG00000028800	Hdac1	HD1|Hdac1-ps|MommeD5|RPD3	histone deacetylase 1	protein-coding
chr2	31822646	31823675	+	0	NA	intron (NM_178887, intron 4 of 6)	intron (NM_178887, intron 4 of 6)	-12580	NM_183424	227717	Mm.185027	NM_183424	ENSMUSG00000043102	Qrfp	P518	pyroglutamylated RFamide peptide	protein-coding
chr9	66794994	66796118	+	0	NA	promoter-TSS (NM_177583)	promoter-TSS (NM_177583)	-133	NM_177583	208117	Mm.41291	NM_177583	ENSMUSG00000032375	Aph1b	2310057K14Rik|Aph1c	aph1 homolog B, gamma secretase subunit	protein-coding
chr11	118792390	118794161	+	0	NA	intron (NM_001039168, intron 2 of 14)	intron (NM_001039168, intron 2 of 14)	-32234	NM_001285438	52897	Mm.341103	NM_001024931	ENSMUSG00000025576	Rbfox3	Fox-3|Hrnbp3|NeuN|Neuna60	RNA binding protein, fox-1 homolog (C. elegans) 3	protein-coding
chr12	50352330	50352981	+	0	NA	intron (NM_008858, intron 17 of 18)	intron (NM_008858, intron 17 of 18)	296568	NM_008858	18760	Mm.133719	NM_008858	ENSMUSG00000002688	Prkd1	PKD|PKD1|Pkcm|Prkcm	protein kinase D1	protein-coding
chr5	129583687	129584590	+	0	NA	promoter-TSS (NM_011846)	promoter-TSS (NM_011846)	-31	NM_011846	23948	Mm.42047	NM_011846	ENSMUSG00000029436	Mmp17	MT4-MMP|MT4MMP|MTMMP4	matrix metallopeptidase 17	protein-coding
chr8	120289639	120290139	+	0	NA	Intergenic	Intergenic	-61659	NR_110496	434353	Mm.411793	NR_110496	ENSMUSG00000097960	A330074K22Rik	-	RIKEN cDNA A330074K22 gene	ncRNA
chr4	135507601	135508248	+	0	NA	intron (NM_030189, intron 2 of 8)	intron (NM_030189, intron 2 of 8)	11937	NM_030189	78806	Mm.374844	NM_030189	ENSMUSG00000028801	Stpg1	4930403G18Rik|4930555I21Rik|Mapo2	sperm tail PG rich repeat containing 1	protein-coding
chr15	80623434	80623781	+	0	NA	5' UTR (NM_010815, exon 1 of 7)	5' UTR (NM_010815, exon 1 of 7)	124	NM_010815	17444	Mm.12947	NM_010815	ENSMUSG00000042351	Grap2	GRAP-2|GRB2L|GRBLG|GRID|Gads|GrbX|Grf40|GrpL|Mona|P38	GRB2-related adaptor protein 2	protein-coding
chr4	41614110	41614567	+	0	NA	exon (NM_175138, exon 11 of 20)	exon (NM_175138, exon 11 of 20)	25964	NM_027147	69638	Mm.372459	NM_027147	ENSMUSG00000028445	Enho	1110065P19Rik|2310040A07Rik	energy homeostasis associated	protein-coding
chr2	86619762	86620569	+	0	NA	Intergenic	Lx|LINE|L1	19553	NM_207135	258235	Mm.314795	NM_207135	ENSMUSG00000110804	Olfr1084	MOR192-2|MOR192-3	olfactory receptor 1084	protein-coding
chr6	5807747	5808412	+	0	NA	intron (NM_001191023, intron 5 of 15)	intron (NM_001191023, intron 5 of 15)	82440	NM_001191026	13426	Mm.20893	NM_010063	ENSMUSG00000029757	Dync1i1	DH IC-1|DHIC-1|DIC|Dncic1|IC74	dynein cytoplasmic 1 intermediate chain 1	protein-coding
chr11	98383363	98385057	+	0	NA	exon (NM_011540, exon 2 of 2)	exon (NM_011540, exon 2 of 2)	399	NM_011540	21393	Mm.10762	NM_011540	ENSMUSG00000007877	Tcap	AI503981|AJ223855	titin-cap	protein-coding
chrX	59071848	59072485	+	0	NA	intron (NM_001356335, intron 3 of 4)	intron (NM_001356335, intron 3 of 4)	25570	NR_030574	100124476		NR_030574	ENSMUSG00000070110	Mir504	Mirn504|mir-504|mmu-mir-504	microRNA 504	ncRNA
chr4	140641182	140641928	+	0	NA	intron (NM_001112722, intron 1 of 27)	intron (NM_001112722, intron 1 of 27)	7201	NM_001112723	72754	Mm.29329	NM_172415	ENSMUSG00000040964	Arhgef10l	2810441C07Rik	Rho guanine nucleotide exchange factor (GEF) 10-like	protein-coding
chr2	181080724	181081581	+	0	NA	exon (NM_001302888, exon 16 of 16)	exon (NM_001302888, exon 16 of 16)	-41975	NM_015730	11438	Mm.252369	NM_015730	ENSMUSG00000027577	Chrna4	Acra-4|Acra4|EBN1|ENFL1	cholinergic receptor, nicotinic, alpha polypeptide 4	protein-coding
chr9	64386676	64387150	+	0	NA	intron (NM_172522, intron 1 of 22)	CpG	1287	NM_001134399	214058	Mm.127721	NM_172522	ENSMUSG00000036466	Megf11	2410080H04Rik|D130061K05	multiple EGF-like-domains 11	protein-coding
chr3	17582792	17583238	+	0	NA	Intergenic	Intergenic	-206906	NR_033490	70441	Mm.458192	NR_033490	ENSMUSG00000100252	Mir124-2hg	100040120|2610100L16Rik|6430547I21Rik|A930005K07Rik|AW125202|Gm2612	Mir124-2 host gene (non-protein coding)	ncRNA
chr12	43310070	43310940	+	0	NA	Intergenic	LTR16A2|LTR|ERVL	-276288	NR_148724	102636207		NR_148724		Gm33340	Gm40882	predicted gene, 33340	ncRNA
chr17	45642617	45643050	+	0	NA	exon (NM_001013767, exon 5 of 22)	exon (NM_001013767, exon 5 of 22)	16476	NM_001013767	268958	Mm.426026	NM_001013767	ENSMUSG00000058626	Capn11	-	calpain 11	protein-coding
chrX	14259443	14260173	+	0	NA	Intergenic	Intergenic	48660	NM_001034100	385328	Mm.275681	NM_001034100	ENSMUSG00000078346	H2al1n	EG385328|Gm5382	H2A histone family member L1N	protein-coding
chr13	88038080	88038654	+	0	NA	Intergenic	L1_Mus3|LINE|L1	-783105	NM_010103	13612	Mm.125580	NM_010103	ENSMUSG00000034488	Edil3	Del-1|Del1|Sox2-cre|Sox2Cre|Tg(Sox2-cre)1Amc	EGF-like repeats and discoidin I-like domains 3	protein-coding
chr11	75172273	75173966	+	0	NA	promoter-TSS (NR_029546)	promoter-TSS (NR_029546)	-269	NR_029794	387208		NR_029794	ENSMUSG00000065590	Mir212	Mirn212|mir-212|mmu-mir-212	microRNA 212	ncRNA
chr17	27676157	27676724	+	0	NA	intron (NM_001286744, intron 1 of 9)	B1_Mur2|SINE|Alu	-8799	NM_178365	23969	Mm.4926	NM_011861	ENSMUSG00000040276	Pacsin1	A830061D09Rik|H74|mKIAA1379|syndapin	protein kinase C and casein kinase substrate in neurons 1	protein-coding
chr17	33898298	33898922	+	0	NA	Intergenic	RLTR42-int|LTR|ERVK	-4480	NM_001369206	474160	Mm.206186	NM_001369205	ENSMUSG00000092349	Smim40	Platr17	small integral membrane protein 40	protein-coding
chr16	4558028	4559519	+	0	NA	intron (NM_031182, intron 1 of 6)	CpG	947	NM_031182	83383	Mm.273210	NM_031182	ENSMUSG00000005718	Tfap4	AI642933|AP-4|D930048N17Rik|Tcfap4|bHLHc41	transcription factor AP4	protein-coding
chr7	127392820	127394114	+	0	NA	5' UTR (NM_198011, exon 1 of 3)	5' UTR (NM_198011, exon 1 of 3)	154	NM_198011	101604	Mm.334241	NM_198011	ENSMUSG00000078580	E430018J23Rik	AI480612	RIKEN cDNA E430018J23 gene	protein-coding
chr7	127008291	127009434	+	0	NA	intron (NM_080638, intron 1 of 14)	intron (NM_080638, intron 1 of 14)	5732	NM_080638	78388	Mm.228797	NM_080638	ENSMUSG00000030681	Mvp	2310009M24Rik|LRP|VAULT1	major vault protein	protein-coding
chr16	7176005	7176416	+	0	NA	intron (NM_183188, intron 1 of 12)	intron (NM_183188, intron 1 of 12)	106375	NM_183188	268859	Mm.370334	NM_021477	ENSMUSG00000008658	Rbfox1	A2bp|A2bp1|Hrnbp1|fox-1	RNA binding protein, fox-1 homolog (C. elegans) 1	protein-coding
chr15	97776428	97776845	+	0	NA	Intergenic	Intergenic	-7729	NM_026353	67739	Mm.28955	NM_026353	ENSMUSG00000081534	Slc48a1	4930570C03Rik	solute carrier family 48 (heme transporter), member 1	protein-coding
chr5	54483935	54484567	+	0	NA	Intergenic	Intergenic	134259	NR_038045	330086	Mm.254449	NM_177871	ENSMUSG00000105912	Gm10440	D130065D13	predicted gene 10440	ncRNA
chr10	104979474	104979888	+	0	NA	Intergenic	Intergenic	594798	NM_177368	278279	Mm.25225	NM_177368	ENSMUSG00000036019	Tmtc2	8430438D04Rik|D330034A10Rik	transmembrane and tetratricopeptide repeat containing 2	protein-coding
chr9	113447346	113448253	+	0	NA	Intergenic	Intergenic	139353	NR_040760	102688	Mm.394901	NR_040760	ENSMUSG00000109890	AU023762	-	expressed sequence AU023762	ncRNA
chr12	119576782	119577142	+	0	NA	Intergenic	Intergenic	133552	NM_001163136	238455	Mm.31376	NM_001163136	ENSMUSG00000041886	Macc1	4732474O15Rik|Gm267	metastasis associated in colon cancer 1	protein-coding
chr4	20767023	20767455	+	0	NA	intron (NM_172987, intron 1 of 4)	intron (NM_172987, intron 1 of 4)	11429	NM_172987	269513	Mm.317473	NM_172987	ENSMUSG00000055761	Nkain3	C530048M05|E130310K16Rik	Na+/K+ transporting ATPase interacting 3	protein-coding
chr4	96725410	96726161	+	0	NA	intron (NM_001081284, intron 10 of 10)	intron (NM_001081284, intron 10 of 10)	59375	NM_001081284	620779	Mm.439625	NM_001081284	ENSMUSG00000078639	Gm12695	-	predicted gene 12695	protein-coding
chr5	135688631	135689539	+	0	NA	promoter-TSS (NM_008898)	promoter-TSS (NM_008898)	-60	NM_008898	18984	Mm.3863	NM_008898	ENSMUSG00000005514	Por	4933424M13Rik|CPR|CYPOR|P450R	P450 (cytochrome) oxidoreductase	protein-coding
chr16	11050271	11050749	+	0	NA	Intergenic	MIR|SINE|MIR	-15788	NM_009223	20621	Mm.325800	NM_009223	ENSMUSG00000037972	Snn	2810407J07Rik|AI848521|AW547286	stannin	protein-coding
chr17	45530221	45530957	+	0	NA	intron (NM_013688, intron 1 of 4)	intron (NM_013688, intron 1 of 4)	7155	NM_013688	21645	Mm.491193	NM_013688	ENSMUSG00000023949	Tcte1	D17Sil1|Tcte-1	t-complex-associated testis expressed 1	protein-coding
chr16	85676976	85678487	+	0	NA	Intergenic	Intergenic	125382	NM_009621	11504	Mm.1421	NM_009621	ENSMUSG00000022893	Adamts1	ADAM-TS1|ADAMTS|ADAMTS-1|C3-C5|METH-1|METH1	a disintegrin-like and metallopeptidase (reprolysin type) with thrombospondin type 1 motif, 1	protein-coding
chr11	11014216	11014859	+	0	NA	Intergenic	Intergenic	-99479	NM_177033	319922	Mm.337851	NM_177033	ENSMUSG00000050830	Vwc2	A930041G11Rik|G11|PSST739|UNQ739|cradin	von Willebrand factor C domain containing 2	protein-coding
chr15	83840738	83841857	+	0	NA	intron (NM_172610, intron 4 of 6)	B4A|SINE|B4	56468	NM_001359131	223726	Mm.36395	NM_172610	ENSMUSG00000041708	Mpped1	6230403M19|AW456965|D15Bwg0669e	metallophosphoesterase domain containing 1	protein-coding
chr8	123527620	123528455	+	0	NA	exon (NM_018855, exon 7 of 11)	exon (NM_018855, exon 7 of 11)	9202	NM_018855	104346	Mm.117265	NM_018855	ENSMUSG00000040220	Gas8	Gas11	growth arrest specific 8	protein-coding
chr5	114393131	114393618	+	0	NA	intron (NR_138602, intron 9 of 27)	intron (NR_138602, intron 9 of 27)	-11094	NR_105994	102465621		NR_105994	ENSMUSG00000098731	Mir7027	Gm27831|mmu-mir-7027	microRNA 7027	ncRNA
chr11	120013213	120013710	+	0	NA	exon (NM_001198785, exon 9 of 14)	exon (NM_001198785, exon 9 of 14)	-1306	NR_037225	100526518		NR_037225	ENSMUSG00000105524	Mir3065	mir-3065|mmu-mir-3065	microRNA 3065	ncRNA
chr5	136929149	136929636	+	0	NA	intron (NR_015555, intron 3 of 3)	intron (NR_015555, intron 3 of 3)	10246	NR_015555	66752	Mm.135764	NR_015555	ENSMUSG00000097908	4933404O12Rik	AW494809	RIKEN cDNA 4933404O12 gene	ncRNA
chr8	124398594	124399877	+	0	NA	intron (NM_171824, intron 1 of 6)	intron (NM_171824, intron 1 of 6)	34701	NM_171824	209966	Mm.234233	NM_171824	ENSMUSG00000050751	Pgbd5	2900019M05Rik|AI854313	piggyBac transposable element derived 5	protein-coding
chr2	166956658	166957357	+	0	NA	intron (NR_111895, intron 3 of 11)	intron (NR_111895, intron 3 of 11)	7710	NR_111895	20853	Mm.73276	NM_011490	ENSMUSG00000039536	Stau1	5830401L18Rik|AW549911|C85792|Stau	staufen double-stranded RNA binding protein 1	protein-coding
chr6	114389912	114390694	+	0	NA	Intergenic	Intergenic	-7633	NM_001317125	15465	Mm.333327	NM_008285	ENSMUSG00000053004	Hrh1	Bphs|H1R|HH1R|Hir	histamine receptor H1	protein-coding
chr5	125763894	125764158	+	0	NA	intron (NM_001190352, intron 5 of 8)	intron (NM_001190352, intron 5 of 8)	-17657	NR_162806	114483666		NR_162806		Mir12200	mmu-mir-12200	microRNA mir-12200	ncRNA
chr1	163129301	163130053	+	0	NA	Intergenic	Intergenic	-44007	NM_030071	78258	Mm.78368	NM_030071	ENSMUSG00000071890	Mroh9	4921528O07Rik|Armc11	maestro heat-like repeat family member 9	protein-coding
chr15	76188406	76189052	+	0	NA	exon (NM_201392, exon 15 of 32)	exon (NM_201392, exon 15 of 32)	6981	NM_201394	18810	Mm.234912	NM_011117	ENSMUSG00000022565	Plec	AA591047|AU042537|EBS1|PCN|PLTN|Plec1	plectin	protein-coding
chr11	59361785	59362156	+	0	NA	Intergenic	Intergenic	13683	NM_001045521	216797	Mm.339586	NM_001045521	ENSMUSG00000049291	Prss38	Gm249|Mpn2	protease, serine 38	protein-coding
chr14	30457339	30458518	+	0	NA	promoter-TSS (NR_131095)	promoter-TSS (NR_131095)	-108	NR_131095	77710	Mm.410773	NR_131095		4831407H17Rik	-	RIKEN cDNA 4831407H17 gene	ncRNA
chr10	26679403	26680118	+	0	NA	Intergenic	Intergenic	-5109	NR_033633	667572	Mm.482728	NR_033633	ENSMUSG00000098179	Gm8709	EG667572	glyceraldehyde-3-phosphate dehydrogenase pseudogene	pseudo
chr9	107707745	107708500	+	0	NA	intron (NM_011349, intron 1 of 17)	intron (NM_011349, intron 1 of 17)	2353	NM_011349	20350	Mm.12903	NM_011349	ENSMUSG00000034684	Sema3f	Sema4|Semak	sema domain, immunoglobulin domain (Ig), short basic domain, secreted, (semaphorin) 3F	protein-coding
chr1	162321367	162322184	+	0	NA	exon (NM_172646, exon 5 of 20)	exon (NM_172646, exon 5 of 20)	98407	NR_029796	387210		NR_029796	ENSMUSG00000065516	Mir214	Mirn214|mir-214|mmu-mir-214	microRNA 214	ncRNA
chr4	148151339	148152366	+	0	NA	promoter-TSS (NM_001163705)	promoter-TSS (NM_001163705)	73	NM_001163705	50762	Mm.27445	NM_015797	ENSMUSG00000055401	Fbxo6	AA408845|FBG2|Fbs2|Fbx6b|Fbxo6b	F-box protein 6	protein-coding
chr11	14181901	14182553	+	0	NA	Intergenic	Intergenic	-3186	NR_131011	75280	Mm.108492	NR_131011	ENSMUSG00000085452	4930554G24Rik	-	RIKEN cDNA 4930554G24 gene	ncRNA
chr5	63161978	63162562	+	0	NA	Intergenic	Intergenic	350614	NM_001170705	100322896		NM_001170705	ENSMUSG00000090326	Dthd1	Gm17384	death domain containing 1	protein-coding
chr1	111833762	111834494	+	0	NA	Intergenic	Intergenic	30790	NM_001081316	319901	Mm.103468	NM_001081316	ENSMUSG00000038702	Dsel	9330132E09Rik|DS-epi2	dermatan sulfate epimerase-like	protein-coding
chr3	75517768	75518367	+	0	NA	intron (NM_019745, intron 7 of 7)	intron (NM_019745, intron 7 of 7)	38785	NM_019745	56426	Mm.316473	NM_019745	ENSMUSG00000027835	Pdcd10	2410003B13Rik|Ccm3|Tfa15|Tfar15	programmed cell death 10	protein-coding
chr10	24469658	24470224	+	0	NA	intron (NR_163910, intron 3 of 4)	intron (NR_163910, intron 3 of 4)	-125501	NM_010217	14219	Mm.390287	NM_010217	ENSMUSG00000019997	Ccn2	Ctgf|Fisp12|Hcs24|fisp-12	cellular communication network factor 2	protein-coding
chr12	34811861	34813027	+	0	NA	intron (NM_001271386, intron 3 of 27)	intron (NM_001271386, intron 3 of 27)	104651	NM_001271386	79221	Mm.310551	NM_024124	ENSMUSG00000004698	Hdac9	AV022454|D030072B18Rik|HD7B|HD9|HDRP|Hdac7b|Mitr|mKIAA0744	histone deacetylase 9	protein-coding
chr4	127203179	127203732	+	0	NA	intron (NM_198618, intron 5 of 11)	L1MEd|LINE|L1	30575	NM_001302081	242667	Mm.331885	NM_198618	ENSMUSG00000042388	Dlgap3	BC058433|DAP-3|DAP3|Prpl8|Sapap3	DLG associated protein 3	protein-coding
chr5	62079066	62079546	+	0	NA	Intergenic	Intergenic	270463	NM_019468	14380	Mm.347430	NM_019468	ENSMUSG00000089992	G6pd2	G6pdx-ps1|Gpd-2|Gpd2	glucose-6-phosphate dehydrogenase 2	protein-coding
chr19	6418074	6418886	+	0	NA	promoter-TSS (NM_001205234)	promoter-TSS (NM_001205234)	-276	NM_001205234	18190	Mm.329616	NM_020253	ENSMUSG00000033768	Nrxn2	6430591O13Rik|mKIAA0921	neurexin II	protein-coding
chr1	141679681	141680315	+	0	NA	Intergenic	Intergenic	-1023596	NR_040604	75910	Mm.483845	NR_040604	ENSMUSG00000102368	4930590L20Rik	-	RIKEN cDNA 4930590L20 gene	ncRNA
chr5	82884630	82885215	+	0	NA	Intergenic	Lx9|LINE|L1	-85857	NR_035415	100316803		NR_035415	ENSMUSG00000080586	Mir1187	Mirn1187|mir-1187|mmu-mir-1187	microRNA 1187	ncRNA
chr7	143722514	143723120	+	0	NA	intron (NM_024289, intron 1 of 21)	intron (NM_024289, intron 1 of 21)	17543	NM_001199227	79196	Mm.21199	NM_024289	ENSMUSG00000037606	Osbpl5	1110006M06Rik|AI462538|ORP5|Obph1|Osbp2	oxysterol binding protein-like 5	protein-coding
chr11	19666497	19667263	+	0	NA	Intergenic	RMER15-int|LTR|ERVL	-257562	NM_033523	114716	Mm.266627	NM_033523	ENSMUSG00000045671	Spred2	C79158	sprouty-related EVH1 domain containing 2	protein-coding
chr11	87801716	87802783	+	0	NA	intron (NM_010824, intron 11 of 13)	intron (NM_010824, intron 11 of 13)	8465	NM_010824	17523	Mm.4668	NM_010824	ENSMUSG00000009350	Mpo	mKIAA4033	myeloperoxidase	protein-coding
chr4	129455106	129455793	+	0	NA	Intergenic	Intergenic	-6230	NM_133889	100383	Mm.17918	NM_133889	ENSMUSG00000040859	Bsdc1	1110063F24Rik|AW011758	BSD domain containing 1	protein-coding
chr2	156666244	156666793	+	0	NA	intron (NM_001277187, intron 2 of 11)	intron (NM_001277187, intron 2 of 11)	52821	NM_001277187	228836	Mm.22094	NM_146128	ENSMUSG00000061689	Dlgap4	AI225853|BC024558|DAP-4|DAP4|SAPAP-4|Sapap4|WBP16	DLG associated protein 4	protein-coding
chr11	116368093	116368534	+	0	NA	intron (NM_027258, intron 2 of 18)	intron (NM_027258, intron 2 of 18)	-32959	NM_008240	15223	Mm.378938	NM_008240	ENSMUSG00000034227	Foxj1	FKHL-13|HFH-4|Hfh4	forkhead box J1	protein-coding
chr11	97669281	97669910	+	0	NA	exon (NM_139311, exon 7 of 20)	exon (NM_139311, exon 7 of 20)	6183	NM_139311	246198	Mm.23685	NM_139311	ENSMUSG00000038437	Mllt6	AI315037|Af17	myeloid/lymphoid or mixed-lineage leukemia; translocated to, 6	protein-coding
chr5	130781507	130781984	+	0	NA	intron (NM_181045, intron 5 of 6)	intron (NM_181045, intron 5 of 6)	332953	NM_021371	140904	Mm.40875	NM_021371	ENSMUSG00000060371	Caln1	9630012C17Rik|Cabp8|MNCb-0849	calneuron 1	protein-coding
chr1	135449793	135450470	+	0	NA	intron (NM_173437, intron 25 of 28)	intron (NM_173437, intron 25 of 28)	4552	NR_049188	100885827		NR_049188	ENSMUSG00000093515	Mir1231	Gm23720|mir-1231|mmu-mir-1231	microRNA 1231	ncRNA
chr17	5911705	5912775	+	0	NA	intron (NM_025664, intron 9 of 17)	intron (NM_025664, intron 9 of 17)	-29040	NM_001113353	20975	Mm.236068	NM_011523	ENSMUSG00000023805	Synj2	AI481647|SJ2|mKIAA0348	synaptojanin 2	protein-coding
chr8	120735846	120736702	+	0	NA	promoter-TSS (NM_008320)	promoter-TSS (NM_008320)	-84	NM_008320	15900	Mm.334861	NM_008320	ENSMUSG00000041515	Irf8	AI893568|ICSBP|IRF-8|Icsbp1|Myls	interferon regulatory factor 8	protein-coding
chr5	62121223	62121596	+	0	NA	Intergenic	Intergenic	312566	NM_019468	14380	Mm.347430	NM_019468	ENSMUSG00000089992	G6pd2	G6pdx-ps1|Gpd-2|Gpd2	glucose-6-phosphate dehydrogenase 2	protein-coding
chr11	118503895	118504394	+	0	NA	intron (NM_001039168, intron 6 of 14)	intron (NM_001039168, intron 6 of 14)	27312	NM_172573	217364	Mm.473963	NM_172573	ENSMUSG00000033857	Engase	C130099A03|D230014K01Rik	endo-beta-N-acetylglucosaminidase	protein-coding
chr16	9074241	9074692	+	0	NA	Intergenic	Intergenic	244366	NM_001081400	69053	Mm.390868	NM_001081400	ENSMUSG00000022507	1810013L24Rik	1110017P05Rik|3010002C02Rik|AA792997|AW124177|Gm19906|R74903	RIKEN cDNA 1810013L24 gene	protein-coding
chr4	148626295	148627387	+	0	NA	non-coding (NR_027864, exon 1 of 8)	non-coding (NR_027864, exon 1 of 8)	155	NM_001003898	230908	Mm.22453	NM_145556	ENSMUSG00000041459	Tardbp	1190002A23Rik|C85084|TDP-43|Tdp43	TAR DNA binding protein	protein-coding
chr19	5704071	5705190	+	0	NA	exon (NM_010609, exon 1 of 3)	exon (NM_010609, exon 1 of 3)	159	NM_010609	16530	Mm.440033	NM_010609	ENSMUSG00000024936	Kcnk7	2310014G03Rik|Kcnk6|Kcnk8|Knot|Mlk3	potassium channel, subfamily K, member 7	protein-coding
chr1	191723660	191724081	+	0	NA	intron (NM_172266, intron 2 of 7)	intron (NM_172266, intron 2 of 7)	5475	NM_001134829	226856	Mm.277958	NM_172266	ENSMUSG00000026623	Lpgat1	AI649174|AW112037|BC013667	lysophosphatidylglycerol acyltransferase 1	protein-coding
chr11	100748694	100748974	+	0	NA	intron (NM_001081194, intron 9 of 16)	intron (NM_001081194, intron 9 of 16)	-10619	NM_001305003	19345	Mm.29829	NM_024456	ENSMUSG00000019173	Rab5c	AI326010|Rabl	RAB5C, member RAS oncogene family	protein-coding
chr5	118036872	118038025	+	0	NA	intron (NM_021344, intron 1 of 7)	intron (NM_021344, intron 1 of 7)	9705	NM_021344	57816	Mm.273285	NM_021344	ENSMUSG00000029359	Tesc	1010001A17Rik|2410011K10Rik|TE-1	tescalcin	protein-coding
chr15	80014716	80015041	+	0	NA	promoter-TSS (NM_011057)	promoter-TSS (NM_011057)	99	NM_011057	18591	Mm.144089	NM_011057	ENSMUSG00000000489	Pdgfb	PDGF-2|PDGF-B|Sis|c-sis	platelet derived growth factor, B polypeptide	protein-coding
chr11	103987186	103987899	+	0	NA	Intergenic	Intergenic	20671	NM_007477	11841	Mm.5061	NM_007477	ENSMUSG00000062421	Arf2	-	ADP-ribosylation factor 2	protein-coding
chr14	88543567	88544245	+	0	NA	Intergenic	Intergenic	-72510	NM_178685	219257	Mm.128861	NM_178685	ENSMUSG00000050505	Pcdh20	C630015B17Rik|Pcdh13	protocadherin 20	protein-coding
chr5	69126530	69126990	+	0	NA	intron (NM_175519, intron 1 of 1)	intron (NM_175519, intron 1 of 1)	214949	NM_175519	243043	Mm.234821	NM_175519	ENSMUSG00000037653	Kctd8	A730087N02Rik	potassium channel tetramerisation domain containing 8	protein-coding
chr11	61597232	61598097	+	0	NA	Intergenic	Intergenic	-17977	NM_010148	13855	Mm.139695	NM_010148	ENSMUSG00000001036	Epn2	9530051D10Rik|AA536924|Ibp2	epsin 2	protein-coding
chr4	141021461	141022028	+	0	NA	exon (NM_001145958, exon 29 of 36)	exon (NM_001145958, exon 29 of 36)	11063	NR_161285	17150	Mm.7386	NM_008546	ENSMUSG00000060572	Mfap2	AI893631|Magp|Magp1	microfibrillar-associated protein 2	protein-coding
chr6	3922806	3923423	+	0	NA	Intergenic	Intergenic	45261	NM_009364	21789	Mm.25612	NM_009364	ENSMUSG00000029664	Tfpi2	AV000670|PP5/TFPI-2	tissue factor pathway inhibitor 2	protein-coding
chr14	64137288	64137686	+	0	NA	intron (NM_001347639, intron 5 of 5)	intron (NM_001347639, intron 5 of 5)	33164	NM_028525	73382	Mm.481055	NM_028525	ENSMUSG00000021966	Prss52	1700049K14Rik|Tesp3	protease, serine 52	protein-coding
chr9	44249452	44249938	+	0	NA	exon (NM_133226, exon 6 of 11)	exon (NM_133226, exon 6 of 11)	1769	NM_133226	170761	Mm.29872	NM_133226	ENSMUSG00000032105	Pdzd3	NaPi-Cap2|Pdzk2	PDZ domain containing 3	protein-coding
chr5	131207832	131208516	+	0	NA	intron (NM_145218, intron 1 of 10)	intron (NM_145218, intron 1 of 10)	99348	NM_145218	212996	Mm.299204	NM_145218	ENSMUSG00000034040	Galnt17	AA388321|E330012B09Rik|Galnt19|Gcap8|Wbscr17	polypeptide N-acetylgalactosaminyltransferase 17	protein-coding
chr15	59978316	59978772	+	0	NA	Intergenic	Intergenic	38074	NM_027668	71088	Mm.425950	NM_027668	ENSMUSG00000071749	4933412E24Rik	-	RIKEN cDNA 4933412E24 gene	protein-coding
chr11	41359428	41359955	+	0	NA	Intergenic	Intergenic	-604405	NM_009831	12450	Mm.2103	NM_009831	ENSMUSG00000020326	Ccng1	AI314029	cyclin G1	protein-coding
chr12	119333330	119333946	+	0	NA	Intergenic	Intergenic	-95362	NM_177290	320910	Mm.217000	NM_177290	ENSMUSG00000025321	Itgb8	4832412O06Rik	integrin beta 8	protein-coding
chr2	32761534	32762131	+	0	NA	TTS (NM_001290567)	TTS (NM_001290567)	4598	NM_001369222	30933	Mm.200695	NM_152800	ENSMUSG00000009563	Tor2a	Prosalusin	torsin family 2, member A	protein-coding
chr1	9140836	9141193	+	0	NA	intron (NM_001290393, intron 2 of 19)	L1_Mus4|LINE|L1	158863	NM_001290392	71096	Mm.336395	NM_027671	ENSMUSG00000025909	Sntg1	4933426D16Rik|G1SYN|SYN4	syntrophin, gamma 1	protein-coding
chr4	152027240	152028139	+	0	NA	promoter-TSS (NM_133879)	promoter-TSS (NM_133879)	-18	NM_133879	100090	Mm.24661	NM_133879	ENSMUSG00000028952	Zbtb48	0610011D15Rik|AI327031|Hkr3|TZAP	zinc finger and BTB domain containing 48	protein-coding
chr1	138289640	138290803	+	0	NA	TTS (NM_177397)	TTS (NM_177397)	16483	NM_177397	338375	Mm.114424	NM_177397	ENSMUSG00000026394	Atp6v1g3	-	ATPase, H+ transporting, lysosomal V1 subunit G3	protein-coding
chr9	29016919	29017224	+	0	NA	intron (NM_001357597, intron 4 of 8)	intron (NM_001357597, intron 4 of 8)	395614	NM_001357602	235106	Mm.283138	NM_172290	ENSMUSG00000059974	Ntm	6230410L23Rik|B230210G24Rik|Hnt|Igdcc2|R75390	neurotrimin	protein-coding
chr11	70715931	70716286	+	0	NA	intron (NM_153103, intron 16 of 22)	intron (NM_153103, intron 16 of 22)	10118	NR_105890	102465557		NR_105890	ENSMUSG00000105932	Mir6925	mmu-mir-6925	microRNA 6925	ncRNA
chr15	73535554	73536227	+	0	NA	intron (NR_152151, intron 7 of 23)	intron (NR_152151, intron 7 of 23)	23330	NM_001081066	105841	Mm.322557	NM_001081066	ENSMUSG00000036661	Dennd3	AI447457|E030003N15Rik	DENN/MADD domain containing 3	protein-coding
chr1	145336762	145337674	+	0	NA	Intergenic	L1_Mur3|LINE|L1	-561791	NM_022881	64214	Mm.253927	NM_022881	ENSMUSG00000026357	Rgs18	-	regulator of G-protein signaling 18	protein-coding
chr5	137745436	137746423	+	0	NA	promoter-TSS (NM_023910)	promoter-TSS (NM_023910)	-40	NM_023910	78829	Mm.286399	NM_023910	ENSMUSG00000029723	Tsc22d4	0610009M14Rik|1700023B23Rik|AI415410|Thg-1pit|Tilz2	TSC22 domain family, member 4	protein-coding
chr9	21870831	21871412	+	0	NA	Intergenic	Intergenic	-18486	NM_177030	319899	Mm.128153	NM_177030	ENSMUSG00000032198	Dock6	2410095B20Rik|4931431C02Rik|C330023D02Rik|mKIAA1395	dedicator of cytokinesis 6	protein-coding
chr5	134374060	134374400	+	0	NA	intron (NM_001081462, intron 22 of 29)	MIR3|SINE|MIR	47776	NR_039544	100628570		NR_039544	ENSMUSG00000093311	Mir3965	mmu-mir-3965|mu-mir-3965	microRNA 3965	ncRNA
chr19	4942402	4943588	+	0	NA	promoter-TSS (NM_172835)	promoter-TSS (NM_172835)	97	NM_172835	240518	Mm.277580	NM_172835	ENSMUSG00000024901	Peli3	6030441F14Rik|A930011L17|BC028931	pellino 3	protein-coding
chr2	156765716	156767436	+	0	NA	Intergenic	Intergenic	-8888	NM_172118	98932	Mm.271770	NM_172118	ENSMUSG00000067818	Myl9	AI327049|MLC20|Mylc2c|RLC-C	myosin, light polypeptide 9, regulatory	protein-coding
chr19	3946669	3947157	+	0	NA	intron (NM_019449, intron 9 of 10)	intron (NM_019449, intron 9 of 10)	11727	NM_001161428	54445	Mm.262094	NM_019449	ENSMUSG00000036908	Unc93b1	Unc-93B1|Unc93b	unc-93 homolog B1, TLR signaling regulator	protein-coding
chr9	45538467	45538870	+	0	NA	intron (NM_001081270, intron 3 of 32)	intron (NM_001081270, intron 3 of 32)	-107436	NR_040732	74602	Mm.394117	NR_040732	ENSMUSG00000097074	4833428L15Rik	-	RIKEN cDNA 4833428L15 gene	ncRNA
chr13	117482582	117483651	+	0	NA	Intergenic	Intergenic	-119204	NM_010408	15165	Mm.343429	NM_010408	ENSMUSG00000021730	Hcn1	Bcng1|C630013B14Rik|HAC2	hyperpolarization activated cyclic nucleotide gated potassium channel 1	protein-coding
chr13	16298355	16298826	+	0	NA	Intergenic	Intergenic	-275167	NR_155430	100503142	Mm.359204	NR_155430		B230303A05Rik	B230303A05|EG328191	U1 small nuclear ribonucleoprotein 1C pseudogene	pseudo
chr17	26999930	27000547	+	0	NA	Intergenic	Intergenic	-17797	NM_001251881	70772	Mm.440437	NM_027544	ENSMUSG00000048731	Ggnbp1	0610031G08Rik|mdf	gametogenetin binding protein 1	protein-coding
chr10	52106065	52106580	+	0	NA	intron (NM_011282, intron 27 of 43)	intron (NM_011282, intron 27 of 43)	83820	NM_153786	215031	Mm.87237	NM_153786	ENSMUSG00000049641	Vgll2	C130057C21Rik|VITO-1|Vito1|vgl-2	vestigial like family member 2	protein-coding
chr10	113240533	113241565	+	0	NA	Intergenic	Intergenic	-312023	NM_001033474	382423	Mm.431239	NM_001033474	ENSMUSG00000074748	Atxn7l3b	4921506J03Rik|6230409E21Rik|AI315132	ataxin 7-like 3B	protein-coding
chr10	80928564	80929255	+	0	NA	Intergenic	MIRc|SINE|MIR	-1182	NM_008655	17873	Mm.1360	NM_008655	ENSMUSG00000015312	Gadd45b	AI323528|Myd118	growth arrest and DNA-damage-inducible 45 beta	protein-coding
chr7	35813177	35813750	+	0	NA	intron (NR_033567, intron 2 of 2)	intron (NR_033567, intron 2 of 2)	-10474	NM_177739	668501	Mm.286296	NM_177739	ENSMUSG00000044452	Zfp507	1810022O10Rik|A230056M16Rik|AL024009|AU021817|BB105092|Gm480|Znf507|mKIAA1084	zinc finger protein 507	protein-coding
chr5	82156199	82156676	+	0	NA	Intergenic	Intergenic	-31724	NR_138557	67327	Mm.87058	NR_138557		1700031L13Rik	-	RIKEN cDNA 1700031L13 gene	ncRNA
chr18	8026901	8027594	+	0	NA	Intergenic	Intergenic	157534	NM_001360956	225131	Mm.204524	NM_153085	ENSMUSG00000024283	Wac	1110067P07Rik|A230035H12Rik|AI256735|AI256776|Wwp4	WW domain containing adaptor with coiled-coil	protein-coding
chr9	121550238	121550738	+	0	NA	Intergenic	Intergenic	-36532	NR_040740	75384	Mm.445955	NR_040740	ENSMUSG00000084995	Lyzl4os	4930589B17Rik|4930596M17Rik	lysozyme-like 4, opposite strand	ncRNA
chr7	144369450	144370014	+	0	NA	intron (NM_001081370, intron 2 of 10)	MTE2a|LTR|ERVL-MaLR	85338	NM_001081370	210274	Mm.483624	NM_001081370	ENSMUSG00000037541	Shank2	ProSAP1|mKIAA1022	SH3 and multiple ankyrin repeat domains 2	protein-coding
chr17	27634866	27635642	+	0	NA	promoter-TSS (NM_025963)	promoter-TSS (NM_025963)	-10	NM_025963	67097	Mm.275810	NM_025963	ENSMUSG00000052146	Rps10	2210402A09Rik	ribosomal protein S10	protein-coding
chr8	56690981	56691745	+	0	NA	Intergenic	Intergenic	140209	NM_001368348	50753	Mm.251174	NM_015791	ENSMUSG00000038206	Fbxo8	Fbx8	F-box protein 8	protein-coding
chr15	84987434	84988503	+	0	NA	promoter-TSS (NM_001033273)	promoter-TSS (NM_001033273)	3	NM_001033273	223739	Mm.323925	NM_001033273	ENSMUSG00000036046	5031439G07Rik	AW554572|mKIAA0930	RIKEN cDNA 5031439G07 gene	protein-coding
chr2	30258575	30259294	+	0	NA	intron (NM_177725, intron 3 of 3)	intron (NM_177725, intron 3 of 3)	-7269	NM_172267	227696	Mm.297949	NM_172267	ENSMUSG00000079484	Phyhd1	-	phytanoyl-CoA dioxygenase domain containing 1	protein-coding
chr9	60200418	60200706	+	0	NA	intron (NM_001040426, intron 7 of 17)	intron (NM_001040426, intron 7 of 17)	-59342	NM_172444	207596	Mm.28791	NM_172444	ENSMUSG00000032289	Thsd4	ADAMTSL-6|ADAMTSL6|AI585901|Adamtsl4|B230114P05Rik	thrombospondin, type I, domain containing 4	protein-coding
chr3	46758405	46759406	+	0	NA	Intergenic	L3b|LINE|CR1	141877	NR_105800	102465199		NR_105800	ENSMUSG00000098417	Mir6379	Gm27730|mmu-mir-6379	microRNA 6379	ncRNA
chr5	117976396	117977986	+	0	NA	intron (NM_001346588, intron 1 of 11)	CpG	421	NM_145564	231670	Mm.21912	NM_145564	ENSMUSG00000032898	Fbxo21	2810425J22Rik|AU016673	F-box protein 21	protein-coding
chr6	106903821	106904544	+	0	NA	Intergenic	Intergenic	-104095	NM_021449	58799	Mm.290085	NM_021449	ENSMUSG00000005362	Crbn	2610203G15Rik|2900045O07Rik|AF229032|AW108261|piL	cereblon	protein-coding
chr9	58253024	58253751	+	0	NA	exon (NM_026942, exon 1 of 7)	exon (NM_026942, exon 1 of 7)	223	NM_026942	69106	Mm.216502	NM_026942	ENSMUSG00000032333	Stoml1	1810015E19Rik|AI847431|SLP1|STORP|UNC24|WPB72	stomatin-like 1	protein-coding
chr19	3707771	3708828	+	0	NA	promoter-TSS (NM_028077)	promoter-TSS (NM_028077)	6	NM_001358256	72056	Mm.23780	NM_028077	ENSMUSG00000035372	1810055G02Rik	AI256204	RIKEN cDNA 1810055G02 gene	protein-coding
chr4	149405032	149405394	+	0	NA	intron (NM_022022, intron 1 of 26)	B3|SINE|B2	21418	NM_022022	63958	Mm.415260	NM_022022	ENSMUSG00000028960	Ube4b	4930551I19Rik|4933406G05Rik|AU014668|D4Bwg0973e|UFD2|UFD2a|Ufd2p|mKIAA0684	ubiquitination factor E4B	protein-coding
chr7	139363941	139365067	+	0	NA	Intergenic	Intergenic	-24605	NM_183144	212111	Mm.28308	NM_183144	ENSMUSG00000025477	Inpp5a	-	inositol polyphosphate-5-phosphatase A	protein-coding
chr6	59010782	59011666	+	0	NA	intron (NM_153574, intron 1 of 17)	intron (NM_153574, intron 1 of 17)	13278	NM_153574	58909	Mm.28813	NM_153574	ENSMUSG00000037709	Fam13a	AI462012|D430015B01Rik|FAM13A1|Precm1	family with sequence similarity 13, member A	protein-coding
chr7	44755729	44755947	+	0	NA	intron (NM_133945, intron 3 of 14)	RMER19B2|LTR|ERVK	7209	NM_133945	101568	Mm.28816	NM_133945	ENSMUSG00000002205	Vrk3	AI428238	vaccinia related kinase 3	protein-coding
chr5	113101315	113101902	+	0	NA	intron (NM_172884, intron 1 of 7)	intron (NM_172884, intron 1 of 7)	-20024	NM_021352	12962	Mm.378899	NM_021352	ENSMUSG00000029352	Crybb3	AI852419	crystallin, beta B3	protein-coding
chr14	112464890	112465781	+	0	NA	Intergenic	MER89|LTR|ERV1	790220	NM_198865	75409	Mm.235097	NM_029273	ENSMUSG00000033214	Slitrk5	2610019D03Rik	SLIT and NTRK-like family, member 5	protein-coding
chr12	58550745	58551451	+	0	NA	Intergenic	Intergenic	-281840	NM_025809	66864	Mm.280563	NM_025809	ENSMUSG00000045930	Clec14a	1200003C23Rik|AI642649	C-type lectin domain family 14, member a	protein-coding
chr14	109310432	109310903	+	0	NA	Intergenic	Intergenic	-396428	NM_199065	76965	Mm.257268	NM_199065	ENSMUSG00000075478	Slitrk1	3200001I04Rik	SLIT and NTRK-like family, member 1	protein-coding
chr11	115427663	115428334	+	0	NA	intron (NM_183285, intron 4 of 5)	intron (NM_183285, intron 4 of 5)	7872	NM_183285	70382	Mm.276299	NM_183285	ENSMUSG00000016940	Kctd2	2310012I15Rik	potassium channel tetramerisation domain containing 2	protein-coding
chr11	60454302	60455090	+	0	NA	exon (NM_021354, exon 1 of 13)	exon (NM_021354, exon 1 of 13)	105	NM_021354	13495	Mm.41803	NM_021354	ENSMUSG00000020537	Drg2	AI255295|AI461605|DRG-2	developmentally regulated GTP binding protein 2	protein-coding
chr12	109975136	109976154	+	0	NA	Intergenic	Intergenic	182428	NR_045466	67280	Mm.390495	NR_045466	ENSMUSG00000113331	3110009F21Rik	-	RIKEN cDNA 3110009F21 gene	ncRNA
chr1	132624868	132625367	+	0	NA	intron (NM_001160318, intron 7 of 26)	L3b|LINE|CR1	17741	NM_001160316	269116	Mm.326702	NM_182716	ENSMUSG00000026442	Nfasc	AA387016|D430023G06Rik|NF|mKIAA0756	neurofascin	protein-coding
chr11	70668410	70669679	+	0	NA	TTS (NM_001190379)	TTS (NM_001190379)	372	NM_172561	216873	Mm.432524	NM_172561	ENSMUSG00000018287	Spag7	5730443G10|ACRP|FSA-1|Fsa1l	sperm associated antigen 7	protein-coding
chr15	73425943	73426168	+	0	NA	Intergenic	Intergenic	-2864	NM_001358045	14083	Mm.254494	NM_007982	ENSMUSG00000022607	Ptk2	FADK 1|FAK|FRNK|Fadk|p125FAK	PTK2 protein tyrosine kinase 2	protein-coding
chr11	114789148	114789440	+	0	NA	exon (NM_001102615, exon 18 of 20)	exon (NM_001102615, exon 18 of 20)	6598	NM_028055	72014	Mm.38347	NM_028055	ENSMUSG00000000202	Btbd17	1500005I02Rik|Tango10a	BTB (POZ) domain containing 17	protein-coding
chr14	116350240	116350836	+	0	NA	intron (NM_175500, intron 7 of 7)	intron (NM_175500, intron 7 of 7)	-574759	NM_011821	23888	Mm.440025	NM_011821	ENSMUSG00000058571	Gpc6	-	glypican 6	protein-coding
chr2	55889639	55890573	+	0	NA	Intergenic	Intergenic	454136	NM_008426	16519	Mm.5127	NM_008426	ENSMUSG00000026824	Kcnj3	GIRK-1|GIRK1|Kcnf3|Kir3.1	potassium inwardly-rectifying channel, subfamily J, member 3	protein-coding
chr19	5654047	5655014	+	0	NA	intron (NM_001164480, intron 9 of 16)	CpG-7241	9177	NM_001164481	20469	Mm.3072	NM_011379	ENSMUSG00000056917	Sipa1	Spa1	signal-induced proliferation associated gene 1	protein-coding
chr12	57400668	57401826	+	0	NA	intron (NM_001164370, intron 8 of 9)	intron (NM_001164370, intron 8 of 9)	144864	NM_008259	15375	Mm.4578	NM_008259	ENSMUSG00000035451	Foxa1	Hnf-3a|Hnf3a|Tcf-3a|Tcf3a	forkhead box A1	protein-coding
chr1	134639423	134639912	+	0	NA	Intergenic	Intergenic	-6945	NM_009307	20980	Mm.5102	NM_009307	ENSMUSG00000026452	Syt2	IP4BP|R74640|mKIAA4194|sytII	synaptotagmin II	protein-coding
chr3	15244724	15245414	+	0	NA	Intergenic	Intergenic	87233	NM_001076679	751864	Mm.431296	NM_001076679	ENSMUSG00000078783	Gm9733	-	predicted gene 9733	protein-coding
chr9	103938081	103938428	+	0	NA	Intergenic	Intergenic	-64290	NM_172460	74025	Mm.479273	NM_028721	ENSMUSG00000032558	Nphp3	3632410F03Rik|AI550417|C230078J01|D330020E01Rik|pcy	nephronophthisis 3 (adolescent)	protein-coding
chr7	16221684	16222367	+	0	NA	promoter-TSS (NM_027883)	promoter-TSS (NM_027883)	7	NM_027883	71723	Mm.75259	NM_027883	ENSMUSG00000006019	Dhx34	1200013B07Rik|1810012L18Rik|Ddx34|mKIAA0134	DEAH (Asp-Glu-Ala-His) box polypeptide 34	protein-coding
chr2	26021051	26022179	+	0	NA	5' UTR (NM_133835, exon 1 of 10)	5' UTR (NM_133835, exon 1 of 10)	145	NM_001362681	98766	Mm.247824	NM_133835	ENSMUSG00000036352	Ubac1	1110033G07Rik|AA407978|GBDR1|Gdbr1|Kpc2|Ubadc1	ubiquitin associated domain containing 1	protein-coding
chr5	122724979	122725429	+	0	NA	intron (NM_001310720, intron 6 of 10)	intron (NM_001310720, intron 6 of 10)	17660	NM_011026	18438	Mm.290884	NM_011026	ENSMUSG00000029470	P2rx4	AI504491|AW555605|D5Ertd444e|P2X4	purinergic receptor P2X, ligand-gated ion channel 4	protein-coding
chr12	35231230	35231872	+	0	NA	Intergenic	Intergenic	-36654	NR_030449	751520		NR_030449	ENSMUSG00000076253	Mir680-3	Mirn680-3	microRNA 680-3	ncRNA
chr4	31320517	31321013	+	0	NA	Intergenic	Intergenic	-643342	NM_009316	26409	Mm.258589	NM_009316	ENSMUSG00000028284	Map3k7	B430101B05|C87327|Tak1	mitogen-activated protein kinase kinase kinase 7	protein-coding
chr4	139598982	139599499	+	0	NA	intron (NM_001205173, intron 1 of 8)	intron (NM_001205173, intron 1 of 8)	-23654	NM_175438	212647	Mm.273571	NM_175438	ENSMUSG00000028737	Aldh4a1	A930035F14Rik|Ahd-1|Ahd1|Aldh4|Aldh5a1|E330022C09|P5cd|P5cdh|P5cdhl|P5cdhs|Ssdh1	aldehyde dehydrogenase 4 family, member A1	protein-coding
chr19	6986916	6987969	+	0	NA	TTS (NM_001356999)	TTS (NM_001356999)	209	NM_001185164	22340	Mm.15607	NM_011697	ENSMUSG00000024962	Vegfb	VEGF-B|Vrf	vascular endothelial growth factor B	protein-coding
chr2	32682886	32683299	+	0	NA	TTS (NM_007932)	TTS (NM_007932)	4674	NR_106168	102465885		NR_106168	ENSMUSG00000098972	Mir8093	Gm27548|mmu-mir-8093	microRNA 8093	ncRNA
chr2	130634843	130635414	+	0	NA	exon (NM_001291028, exon 5 of 5)	exon (NM_001291028, exon 5 of 5)	-5090	NM_001255994	140629	Mm.486003	NM_080562	ENSMUSG00000027300	Ubox5	1500010O06Rik|C330018L13Rik|Rnf37|UIP5|Ubce7ip5|Ube7ip5	U box domain containing 5	protein-coding
chr1	117418886	117419707	+	0	NA	Intergenic	Intergenic	891432	NR_153836	22099	Mm.426637	NM_011650	ENSMUSG00000026374	Tsn	2610034C24Rik|AU040286|C3PO|TB-RBP	translin	protein-coding
chr15	76656662	76657261	+	0	NA	promoter-TSS (NM_001276321)	promoter-TSS (NM_001276321)	-60	NM_001276321	54151	Mm.247752	NM_019396	ENSMUSG00000053929	Cyhr1	1110031M01Rik|AU042374|Chrp	cysteine and histidine rich 1	protein-coding
chr1	94368867	94369764	+	0	NA	Intergenic	Intergenic	-316762	NM_008798	18566	Mm.5024	NM_008798	ENSMUSG00000026285	Pdcd1	Ly101|PD-1|Pdc1	programmed cell death 1	protein-coding
chrX	104482504	104483801	+	0	NA	exon (NM_001081189, exon 1 of 7)	exon (NM_001081189, exon 1 of 7)	349	NM_001081189	331487	Mm.40283	NM_001081189	ENSMUSG00000073016	Uprt	D830012I24Rik|Gm774	uracil phosphoribosyltransferase	protein-coding
chr3	19956929	19957614	+	0	NA	5' UTR (NM_007752, exon 1 of 19)	5' UTR (NM_007752, exon 1 of 19)	217	NM_001276248	12870	Mm.13787	NM_007752	ENSMUSG00000003617	Cp	D3Ertd555e	ceruloplasmin	protein-coding
chr2	108223637	108223971	+	0	NA	Intergenic	Intergenic	933215	NM_021275	16492	Mm.142718	NM_021275	ENSMUSG00000042604	Kcna4	Kv1.4	potassium voltage-gated channel, shaker-related subfamily, member 4	protein-coding
chr10	129936756	129937271	+	0	NA	Intergenic	L1_Mur2|LINE|L1	9047	NM_146777	258773	Mm.451663	NM_146777	ENSMUSG00000058071	Olfr818	MOR110-2	olfactory receptor 818	protein-coding
chr7	19326507	19327631	+	0	NA	Intergenic	Intergenic	-17024	NM_008036	14282	Mm.248335	NM_008036	ENSMUSG00000003545	Fosb	-	FBJ osteosarcoma oncogene B	protein-coding
chr9	63650865	63651263	+	0	NA	intron (NM_016769, intron 8 of 8)	intron (NM_016769, intron 8 of 8)	48418	NM_001357323	66939	Mm.34338	NM_025857	ENSMUSG00000037257	Aagab	2310007F21Rik|p34	alpha- and gamma-adaptin binding protein	protein-coding
chr4	96683450	96683934	+	0	NA	Intergenic	Intergenic	-19573	NM_010007	13109	Mm.12838	NM_010007	ENSMUSG00000052520	Cyp2j5	-	cytochrome P450, family 2, subfamily j, polypeptide 5	protein-coding
chr2	6667660	6668118	+	0	NA	intron (NM_001160293, intron 2 of 13)	intron (NM_001160293, intron 2 of 13)	53773	NM_001310447	14007	Mm.398543	NM_010160	ENSMUSG00000002107	Celf2	B230218O03|B230345P09Rik|C88023|CELF-2|CUG-BP2|Cugbp2|D230046B21Rik|Etr-3|Napor|Napor-2|mETR-3	CUGBP, Elav-like family member 2	protein-coding
chr15	93610168	93611180	+	0	NA	Intergenic	Intergenic	-14772	NM_001033217	106042	Mm.150314	NM_001033217	ENSMUSG00000036158	Prickle1	1110058P22Rik|AW215793|Prickle|b2b019Clo|mpk1	prickle planar cell polarity protein 1	protein-coding
chr5	124139081	124139752	+	0	NA	intron (NM_001289472, intron 5 of 24)	intron (NM_001289472, intron 5 of 24)	23308	NM_144509	65105	Mm.29430	NM_144509	ENSMUSG00000029404	Arl6ip4	AA408210|AA408365|Aip-4|Srp25	ADP-ribosylation factor-like 6 interacting protein 4	protein-coding
chr9	20898140	20898912	+	0	NA	promoter-TSS (NM_016876)	promoter-TSS (NM_016876)	64	NM_016876	53356	Mm.427309	NM_016876	ENSMUSG00000070319	Eif3g	44kDa|D0Jmb4|Eif3s4|TU-189B2|eIF3-p44|p44	eukaryotic translation initiation factor 3, subunit G	protein-coding
chr16	95064462	95064740	+	0	NA	Intergenic	Intergenic	-66905	NM_001025585	16522	Mm.328720	NM_010606	ENSMUSG00000043301	Kcnj6	BIR1|GIRK2|KATP2|KCNJ7|Kir3.2|weaver|wv	potassium inwardly-rectifying channel, subfamily J, member 6	protein-coding
chr1	192295199	192295964	+	0	NA	intron (NM_010600, intron 6 of 10)	intron (NM_010600, intron 6 of 10)	104804	NM_010600	16510	Mm.4489	NM_010600	ENSMUSG00000058248	Kcnh1	EAG1|Kv10.1|M-eag	potassium voltage-gated channel, subfamily H (eag-related), member 1	protein-coding
chr7	80654989	80656062	+	0	NA	intron (NM_173863, intron 2 of 14)	intron (NM_173863, intron 2 of 14)	19508	NR_040343	100504375	Mm.322881	NR_040343	ENSMUSG00000084821	Gm15880	-	predicted gene 15880	ncRNA
chr11	75267823	75268378	+	0	NA	TTS (NM_177708)	TTS (NM_177708)	74107	NM_177708	237847	Mm.82661	NM_177708	ENSMUSG00000045287	Rtn4rl1	Ngr3|Ngrh2|Ngrl2	reticulon 4 receptor-like 1	protein-coding
chr8	16014388	16014971	+	0	NA	intron (NM_053171, intron 41 of 69)	intron (NM_053171, intron 41 of 69)	154159	NR_037214	100526464		NR_037214	ENSMUSG00000093142	Mir3106	mir-3106|mmu-mir-3106	microRNA 3106	ncRNA
chr11	94463731	94463995	+	0	NA	intron (NM_001112813, intron 4 of 34)	MIRc|SINE|MIR	10335	NM_001177888	12291	Mm.29585	NM_009783	ENSMUSG00000020866	Cacna1g	Cav3.1d|[a]1G|a1G|alpha-1G|mKIAA1123	calcium channel, voltage-dependent, T type, alpha 1G subunit	protein-coding
chrX	53670073	53671045	+	0	NA	promoter-TSS (NM_001018063)	promoter-TSS (NM_001018063)	-122	NM_001018063	553127	Mm.328602	NM_001018063	ENSMUSG00000067924	Rtl8b	Cxx1b|Mart8c	retrotransposon Gag like 8B	protein-coding
chr2	32857554	32858041	+	0	NA	Intergenic	Intergenic	-10560	NM_001113569	20910	Mm.278865	NM_009295	ENSMUSG00000026797	Stxbp1	AI317162|AI326233|MMS10-G|Ms10g|Munc-18a|Munc18-1|N-sec1|Rb-sec1|Sxtbp1|Unc18-1|Unc18h|nsec1	syntaxin binding protein 1	protein-coding
chr15	97830355	97831968	+	0	NA	intron (NM_001204276, intron 1 of 25)	CpG	606	NM_019572	56233	Mm.384027	NM_019572	ENSMUSG00000022475	Hdac7	5830434K02Rik|HD7|HD7a|Hdac7a|mFLJ00062	histone deacetylase 7	protein-coding
chr7	132284606	132285236	+	0	NA	intron (NM_029935, intron 1 of 7)	intron (NM_029935, intron 1 of 7)	-30743	NR_028578	100043682	Mm.482794	NR_028578	ENSMUSG00000109270	Gm10584	-	predicted gene 10584	ncRNA
chr5	12787402	12788201	+	0	NA	Intergenic	Intergenic	404635	NM_028882	108151	Mm.89313	NM_028882	ENSMUSG00000040254	Sema3d	4631426B19Rik	sema domain, immunoglobulin domain (Ig), short basic domain, secreted, (semaphorin) 3D	protein-coding
chr11	98927562	98928215	+	0	NA	Intergenic	Intergenic	-9808	NM_009024	19401	Mm.439744	NM_009024	ENSMUSG00000037992	Rara	Nr1b1|RAR|RARalpha1	retinoic acid receptor, alpha	protein-coding
chr8	122955737	122956248	+	0	NA	intron (NM_001081379, intron 2 of 12)	intron (NM_001081379, intron 2 of 12)	86292	NM_001081379	77087	Mm.31567	NM_001081379	ENSMUSG00000035569	Ankrd11	2410104C19Rik|3010027A04Rik|6330578C09Rik|9530048I21Rik|AA930108|Gm176|Yod	ankyrin repeat domain 11	protein-coding
chr5	24384418	24384829	+	0	NA	TTS (NM_008713)	TTS (NM_008713)	7520	NM_001002897	213948	Mm.332252	NM_001002897	ENSMUSG00000038295	Atg9b	Apg912|Apg9l2|Apgdc2|Gm574|Nos3as|eONE|sONE	autophagy related 9B	protein-coding
chr1	69591318	69592328	+	0	NA	intron (NM_011770, intron 3 of 7)	intron (NM_011770, intron 3 of 7)	94137	NM_011770	22779	Mm.106343	NM_011770	ENSMUSG00000025997	Ikzf2	A730095J18Rik|Helios|Zfpn1a2|Znfn1a2	IKAROS family zinc finger 2	protein-coding
chr17	34605496	34606114	+	0	NA	promoter-TSS (NM_001163379)	promoter-TSS (NM_001163379)	-56	NM_001163379	55979	Mm.8684	NM_018862	ENSMUSG00000034254	Agpat1	1-AGP|1-AGPAT|AW047140	1-acylglycerol-3-phosphate O-acyltransferase 1 (lysophosphatidic acid acyltransferase, alpha)	protein-coding
chr4	138543095	138543564	+	0	NA	Intergenic	Intergenic	80663	NM_029401	75718	Mm.251530	NM_029401	ENSMUSG00000028753	Vwa5b1	4931403E03Rik	von Willebrand factor A domain containing 5B1	protein-coding
chr4	129533246	129533897	+	0	NA	intron (NM_008228, intron 2 of 13)	ID_B1|SINE|B4	9075	NM_008228	433759	Mm.202504	NM_008228	ENSMUSG00000028800	Hdac1	HD1|Hdac1-ps|MommeD5|RPD3	histone deacetylase 1	protein-coding
chr3	62245951	62246502	+	0	NA	Intergenic	Intergenic	-92551	NM_001081295	622434	Mm.153974	NM_001081295	ENSMUSG00000036885	Arhgef26	4631416L12Rik|8430436L14Rik|AI303572|AW491953|SGEF	Rho guanine nucleotide exchange factor (GEF) 26	protein-coding
chr12	109610967	109611843	+	0	NA	promoter-TSS (NR_035419)	promoter-TSS (NR_035419)	-95	NR_029770	723846		NR_029770	ENSMUSG00000070101	Mir341	Mirn341|mmu-mir-341	microRNA 341	ncRNA
chr6	32702109	32702731	+	0	NA	Intergenic	Intergenic	-114228	NM_175750	243743	Mm.444029	NM_175750	ENSMUSG00000029765	Plxna4	9330117B14|Plxa4|mKIAA1550	plexin A4	protein-coding
chr5	118331223	118332210	+	0	NA	Intergenic	Intergenic	86489	NM_001081236	76792	Mm.103428	NM_001081236	ENSMUSG00000032840	2410131K14Rik	-	RIKEN cDNA 2410131K14 gene	protein-coding
chr11	114284559	114285739	+	0	NA	Intergenic	Intergenic	86891	NR_045930	73536	Mm.54275	NR_045930	ENSMUSG00000078600	1700092K14Rik	-	RIKEN cDNA 1700092K14 gene	ncRNA
chr11	119997394	119997821	+	0	NA	exon (NM_130862, exon 10 of 14)	exon (NM_130862, exon 10 of 14)	-17160	NR_037225	100526518		NR_037225	ENSMUSG00000105524	Mir3065	mir-3065|mmu-mir-3065	microRNA 3065	ncRNA
chr14	64153982	64154554	+	0	NA	intron (NM_001347639, intron 5 of 5)	intron (NM_001347639, intron 5 of 5)	49945	NM_028525	73382	Mm.481055	NM_028525	ENSMUSG00000021966	Prss52	1700049K14Rik|Tesp3	protease, serine 52	protein-coding
chr3	150610431	150611156	+	0	NA	Intergenic	Intergenic	413069	NR_039540	100628568		NR_039540	ENSMUSG00000092830	Mir3963	mmu-mir-3963|mu-mir-3963	microRNA 3963	ncRNA
chr16	5049453	5050633	+	0	NA	promoter-TSS (NM_026666)	promoter-TSS (NM_026666)	-14	NM_026666	170644	Mm.66356	NM_026666	ENSMUSG00000039473	Ubn1	1110029L11Rik|2610108L02Rik|AA673476|AW124741	ubinuclein 1	protein-coding
chr5	135903437	135904703	+	0	NA	Intergenic	Intergenic	16151	NM_013560	15507	Mm.13849	NM_013560	ENSMUSG00000004951	Hspb1	27kDa|Hsp25	heat shock protein 1	protein-coding
chr1	95667056	95668416	+	0	NA	promoter-TSS (NM_001159745)	promoter-TSS (NM_001159745)	-142	NM_001159745	20452	Mm.306228	NM_009183	ENSMUSG00000040710	St8sia4	PST|PST-1|SIAT8-D|ST8SiaIV|Siat8d	ST8 alpha-N-acetyl-neuraminide alpha-2,8-sialyltransferase 4	protein-coding
chr2	156720594	156721480	+	0	NA	promoter-TSS (NR_040505)	promoter-TSS (NR_040505)	72	NM_001042488	228836	Mm.22094	NM_146128	ENSMUSG00000061689	Dlgap4	AI225853|BC024558|DAP-4|DAP4|SAPAP-4|Sapap4|WBP16	DLG associated protein 4	protein-coding
chr6	60159058	60159783	+	0	NA	Intergenic	Intergenic	81401	NR_152156	434019	Mm.445137	NR_152156	ENSMUSG00000073045	Gm5570	EG434019	predicted gene 5570	ncRNA
chr9	69321425	69322268	+	0	NA	intron (NM_001289916, intron 1 of 9)	intron (NM_001289916, intron 1 of 9)	32005	NM_001289916	19883	Mm.378450	NM_013646	ENSMUSG00000032238	Rora	9530021D13Rik|Nr1f1|ROR1|ROR2|ROR3|nmf267|sg|staggerer|tmgc26	RAR-related orphan receptor alpha	protein-coding
chr2	25271837	25272890	+	0	NA	promoter-TSS (NM_023464)	promoter-TSS (NM_023464)	55	NM_023464	68475	Mm.21444	NM_023464	ENSMUSG00000026966	Ssna1	1110003H09Rik|1190004J23Rik|AA934184|N14|NA14	SS nuclear autoantigen 1	protein-coding
chr15	89075115	89076579	+	0	NA	promoter-TSS (NM_026485)	promoter-TSS (NM_026485)	7	NR_040417	69120	Mm.276391	NR_040417	ENSMUSG00000087331	1810021B22Rik	-	RIKEN cDNA 1810021B22 gene	ncRNA
chr14	82244812	82245444	+	0	NA	Intergenic	Intergenic	1830162	NR_153783	102635012	Mm.399509	NR_153783	ENSMUSG00000115043	Gm32455	-	predicted gene, 32455	ncRNA
chr5	125904414	125904730	+	0	NA	Intergenic	Intergenic	-54671	NM_001370875	231736		NM_001370875		Gm4868	EG231736	predicted gene 4868	protein-coding
chr5	78568135	78568607	+	0	NA	Intergenic	Intergenic	1102883	NR_131050	69370	Mm.426881	NR_131050	ENSMUSG00000107232	1700017L05Rik	-	RIKEN cDNA 1700017L05 gene	ncRNA
chr10	73086381	73087201	+	0	NA	promoter-TSS (NR_040646)	promoter-TSS (NR_040646)	-86	NR_040646	327768	Mm.417745	NR_040646	ENSMUSG00000111994	A330049N07Rik	-	RIKEN cDNA A330049N07 gene	ncRNA
chr6	113944969	113945459	+	0	NA	intron (NM_009723, intron 2 of 21)	intron (NM_009723, intron 2 of 21)	-10533	NM_001347365	11941	Mm.321755	NM_009723	ENSMUSG00000030302	Atp2b2	D6Abb2e|Gena300|PMCA2|Tmy|dfw|jog|wms|wri	ATPase, Ca++ transporting, plasma membrane 2	protein-coding
chr2	29468401	29469210	+	0	NA	intron (NM_001290489, intron 2 of 6)	intron (NM_001290489, intron 2 of 6)	6489	NR_105753	102465170		NR_105753	ENSMUSG00000098539	Mir133c	Gm27865|mmu-mir-133c	microRNA 133c	ncRNA
chr11	79599254	79600476	+	0	NA	intron (NM_175543, intron 1 of 14)	intron (NM_175543, intron 1 of 14)	8653	NM_175543	268451	Mm.130656	NM_175543	ENSMUSG00000017639	Rab11fip4	A730072L08Rik|RAB11-FIP4|mKIAA1821	RAB11 family interacting protein 4 (class II)	protein-coding
chr7	141060264	141061419	+	0	NA	promoter-TSS (NM_177897)	promoter-TSS (NM_177897)	-137	NM_177897	330671	Mm.133741	NM_177897	ENSMUSG00000055629	B4galnt4	Gm1095|NGalNAc-T1|beta4GalNAcT4	beta-1,4-N-acetyl-galactosaminyl transferase 4	protein-coding
chr9	64990024	64990831	+	0	NA	exon (NM_021345, exon 10 of 11)	exon (NM_021345, exon 10 of 11)	29497	NM_175153	69882	Mm.272616	NM_175153	ENSMUSG00000034263	Ints14	2010321M09Rik|Vwa9	integrator complex subunit 14	protein-coding
chr11	77624084	77625483	+	0	NA	Intergenic	Intergenic	-16968	NM_001364134	216965	Mm.340436	NM_144825	ENSMUSG00000017291	Taok1	2810468K05Rik|AU020252|D130018F14Rik|Map3k16|Markk|Psk2	TAO kinase 1	protein-coding
chr9	64501015	64501780	+	0	NA	intron (NM_172522, intron 1 of 22)	intron (NM_172522, intron 1 of 22)	115771	NM_001134399	214058	Mm.127721	NM_172522	ENSMUSG00000036466	Megf11	2410080H04Rik|D130061K05	multiple EGF-like-domains 11	protein-coding
chr15	89148432	89149811	+	0	NA	intron (NM_011161, intron 1 of 11)	intron (NM_011161, intron 1 of 11)	485	NM_011161	19094	Mm.91969	NM_011161	ENSMUSG00000053137	Mapk11	P38b|Prkm11|Sapk2|Sapk2b|p38-2|p38beta|p38beta2	mitogen-activated protein kinase 11	protein-coding
chr5	117563577	117563986	+	0	NA	intron (NM_001312914, intron 4 of 19)	intron (NM_001312914, intron 4 of 19)	149779	NM_001312914	333050	Mm.437947	NM_001034873	ENSMUSG00000061578	Ksr2	-	kinase suppressor of ras 2	protein-coding
chr4	151107665	151109055	+	0	NA	intron (NM_001081557, intron 11 of 23)	CpG	18790	NM_001308446	105704528	Mm.415128	NM_001308446	ENSMUSG00000078491	Gm13090	-	predicted gene 13090	protein-coding
chr13	29769697	29770286	+	0	NA	intron (NR_131896, intron 5 of 16)	intron (NR_131896, intron 5 of 16)	85682	NR_131896	68916	Mm.212227	NM_144536	ENSMUSG00000006191	Cdkal1	1190005B03Rik|6620401C13Rik	CDK5 regulatory subunit associated protein 1-like 1	protein-coding
chr5	128204186	128205816	+	0	NA	intron (NM_172885, intron 2 of 8)	intron (NM_172885, intron 2 of 8)	228076	NM_172885	243274	Mm.447698	NM_172885	ENSMUSG00000034310	Tmem132d	C630028F04Rik	transmembrane protein 132D	protein-coding
chr4	148517928	148518892	+	0	NA	intron (NM_020009, intron 30 of 57)	intron (NM_020009, intron 30 of 57)	-17948	NM_001039554	654812	Mm.388929	NM_001039554	ENSMUSG00000028989	Angptl7	-	angiopoietin-like 7	protein-coding
chr4	133011206	133012364	+	0	NA	intron (NM_146155, intron 1 of 6)	CpG	279	NM_146155	230793	Mm.31816	NM_146155	ENSMUSG00000037692	Ahdc1	D030015G18Rik	AT hook, DNA binding motif, containing 1	protein-coding
chr4	61834783	61835851	+	0	NA	promoter-TSS (NM_008649)	promoter-TSS (NM_008649)	-137	NM_008649	17844	Mm.445286	NM_008649	ENSMUSG00000058523	Mup5	Mup18	major urinary protein 5	protein-coding
chr5	10632953	10633629	+	0	NA	Intergenic	Intergenic	-231738	NR_003596	623849	Mm.335888	NR_003596	ENSMUSG00000091422	Gm6455	EG623849	predicted gene 6455	pseudo
chr4	126202253	126203167	+	0	NA	promoter-TSS (NM_146153)	promoter-TSS (NM_146153)	0	NM_146153	230753	Mm.29813	NM_146153	ENSMUSG00000043962	Thrap3	9330151F09Rik|B230333E16Rik|Trap150	thyroid hormone receptor associated protein 3	protein-coding
chr11	78290633	78291764	+	0	NA	TTS (NM_001002004)	TTS (NM_001002004)	357	NM_001287206	216976	Mm.477146	NM_001045522		Rskr	BC037104|Sgk494	ribosomal protein S6 kinase related	protein-coding
chr11	51999883	52001112	+	0	NA	promoter-TSS (NM_009458)	promoter-TSS (NM_009458)	-6	NM_001362686	22210	Mm.384918	NM_009458	ENSMUSG00000020390	Ube2b	E2-14k|E214K|HR6B|Rad6b|mHR6B	ubiquitin-conjugating enzyme E2B	protein-coding
chr7	99940696	99941111	+	0	NA	intron (NM_175388, intron 3 of 5)	intron (NM_175388, intron 3 of 5)	-8011	NR_163856
chr13	43492852	43494306	+	0	NA	Intergenic	Intergenic	-12606	NM_019930	56705	Mm.148781	NM_019930	ENSMUSG00000038546	Ranbp9	IBAP-1|Ibap1|RanBPM	RAN binding protein 9	protein-coding
chr11	99416711	99417300	+	0	NA	promoter-TSS (NR_153851)	promoter-TSS (NR_153851)	-238	NR_153851	353123		NR_153851	ENSMUSG00000084890	A830036E02Rik	-	RIKEN cDNA A830036E02 gene	ncRNA
chr7	111692575	111693168	+	0	NA	intron (NM_173739, intron 1 of 10)	intron (NM_173739, intron 1 of 10)	87106	NM_173739	233733	Mm.323322	NM_173739	ENSMUSG00000038296	Galnt18	2900011G21Rik|BC024988|Galntl4|galNAc-T18|mpp-GalNAc-T18(O18)	polypeptide N-acetylgalactosaminyltransferase 18	protein-coding
chr10	80826105	80827079	+	0	NA	promoter-TSS (NM_008753)	promoter-TSS (NM_008753)	-64	NM_008753	18245	Mm.398119	NM_008753	ENSMUSG00000035242	Oaz1	AZ-1|AZ1|Antizyme|ODC-Az|Oaz	ornithine decarboxylase antizyme 1	protein-coding
chr7	130546592	130547537	+	0	NA	exon (NM_001162855, exon 1 of 11)	exon (NM_001162855, exon 1 of 11)	317	NM_001162855	67872	Mm.21714	NM_001162855	ENSMUSG00000040331	Nsmce4a	2410003A14Rik	NSE4 homolog A, SMC5-SMC6 complex component	protein-coding
chrX	68145946	68146791	+	0	NA	Intergenic	Intergenic	-136189	NR_030575	100124449		NR_030575	ENSMUSG00000106233	Mir509	Mirn509|mmu-mir-509	microRNA 509	ncRNA
chr6	103825442	103826490	+	0	NA	Intergenic	Intergenic	138718	NR_144494	100846987		NR_144494		Pou5f1-rs5	Gm21054|Oct4P5|Otf3-rs5|Otf3e	POU domain, class 5, transcription factor 1, related sequence 5	pseudo
chr10	80406480	80407271	+	0	NA	promoter-TSS (NM_025650)	promoter-TSS (NM_025650)	-54	NM_025650	66594	Mm.379119	NM_025650	ENSMUSG00000020163	Uqcr11	0710008D09Rik|AL022707|Uqcr	ubiquinol-cytochrome c reductase, complex III subunit XI	protein-coding
chr12	112144798	112145672	+	0	NA	promoter-TSS (NM_001097621)	promoter-TSS (NM_001097621)	-973	NM_001097621	668303	Mm.313104	NM_001097621	ENSMUSG00000021294	Kif26a	mKIAA1236	kinesin family member 26A	protein-coding
chr15	80062848	80063545	+	0	NA	Intergenic	Intergenic	15383	NR_028282	100302601		NR_028282	ENSMUSG00000077734	Snord83b	MBII-10	small nucleolar RNA, C/D box 83B	snoRNA
chr5	137179571	137180057	+	0	NA	Intergenic	Intergenic	-13768	NM_010843	666339	Mm.7184	NM_010843		Muc3	-	mucin 3, intestinal	protein-coding
chr15	84253840	84254711	+	0	NA	intron (NM_133167, intron 1 of 12)	Tigger17c|DNA|TcMar-Tigger	22232	NM_133167	170736	Mm.323892	NM_133167	ENSMUSG00000022438	Parvb	AI595373|AW742462|D15Gsk1|affixin	parvin, beta	protein-coding
chr1	170341367	170341983	+	0	NA	intron (NR_154593, intron 5 of 9)	intron (NR_154593, intron 5 of 9)	32856	NM_001039593	76925	Mm.33631	NM_001039593	ENSMUSG00000042800	Spata46	1700015E13Rik	spermatogenesis associated 46	protein-coding
chr4	138068459	138069868	+	0	NA	intron (NM_001256195, intron 4 of 34)	intron (NM_001256195, intron 4 of 34)	69355	NR_126429	73563	Mm.444294	NR_126429	ENSMUSG00000084804	1700095J12Rik	-	RIKEN cDNA 1700095J12 gene	ncRNA
chr3	140218114	140218660	+	0	NA	Intergenic	B3A|SINE|B2	190138	NR_105798	102465198		NR_105798	ENSMUSG00000099169	Mir7j	Gm27716|Mirlet7j|mmu-let-7j	microRNA 7j	ncRNA
chr2	107304401	107305323	+	0	NA	Intergenic	Intergenic	14273	NM_021275	16492	Mm.142718	NM_021275	ENSMUSG00000042604	Kcna4	Kv1.4	potassium voltage-gated channel, shaker-related subfamily, member 4	protein-coding
chr19	5272428	5273854	+	0	NA	promoter-TSS (NM_001362451)	promoter-TSS (NM_001362451)	-22	NM_153129	107975	Mm.234923	NM_153129	ENSMUSG00000024855	Pacs1	AI325977	phosphofurin acidic cluster sorting protein 1	protein-coding
chr12	111533159	111533388	+	0	NA	Intergenic	Intergenic	-4828	NM_173363	217869	Mm.271222	NM_173363	ENSMUSG00000021282	Eif5	2810011H21Rik|D12Ertd549e	eukaryotic translation initiation factor 5	protein-coding
chr6	113612469	113613074	+	0	NA	intron (NM_133937, intron 1 of 2)	intron (NM_133937, intron 1 of 2)	7999	NM_133937	101314	Mm.485793	NM_133937	ENSMUSG00000033940	Brk1	6720456B07Rik|AW011779	BRICK1, SCAR/WAVE actin-nucleating complex subunit	protein-coding
chr11	103892837	103893236	+	0	NA	intron (NM_008740, intron 8 of 20)	intron (NM_008740, intron 8 of 20)	61020	NM_008740	18195	Mm.260117	NM_008740	ENSMUSG00000034187	Nsf	AI316878|AU020090|AU067812|SKD2	N-ethylmaleimide sensitive fusion protein	protein-coding
chr6	91518560	91519075	+	0	NA	intron (NM_026309, intron 2 of 3)	Tigger15a|DNA|TcMar-Tigger	2782	NM_026309	67678	Mm.246693	NM_026309	ENSMUSG00000034192	Lsm3	1010001J12Rik|2610005D18Rik|6030401D18Rik|SMX4|USS2	LSM3 homolog, U6 small nuclear RNA and mRNA degradation associated	protein-coding
chr17	39832602	39833388	+	0	NA	Intergenic	MTC-int|LTR|ERVL-MaLR	-10002	NR_046233	100861531		NR_046233		Rn45s	-	45S pre-ribosomal RNA	rRNA
chr2	134354275	134355067	+	0	NA	Intergenic	Intergenic	199681	NM_010403	15112	Mm.26634	NM_010403	ENSMUSG00000027261	Hao1	GOX|Gox1|Hao-1	hydroxyacid oxidase 1, liver	protein-coding
chr13	77630255	77631151	+	0	NA	Intergenic	ERVB4_1B-I_MM-int|LTR|ERVK	-77987	NM_001163419	68675	Mm.343005	NM_138312	ENSMUSG00000064138	Fam172a	1110033M05Rik|2610318O14Rik|53-E6|9430037D06Rik|AF064782|pEN87	family with sequence similarity 172, member A	protein-coding
chr8	124141844	124142563	+	0	NA	Intergenic	Intergenic	-89191	NM_139272	108148	Mm.33808	NM_139272	ENSMUSG00000089704	Galnt2	AI480629	polypeptide N-acetylgalactosaminyltransferase 2	protein-coding
chr17	30471262	30471794	+	0	NA	intron (NM_172618, intron 6 of 11)	CT-rich|Low_complexity|Low_complexity	-75348	NR_030688	623169	Mm.440508	NR_030688		Gm6402	EG623169	ribosomal protein S17 pseudogene	pseudo
chr9	79387605	79388061	+	0	NA	Intergenic	L1MC|LINE|L1	131469	NR_045336	100038575	Mm.367838	NR_045336	ENSMUSG00000111765	Gm10635	-	predicted gene 10635	ncRNA
chr4	133068942	133069329	+	0	NA	intron (NM_146155, intron 6 of 6)	intron (NM_146155, intron 6 of 6)	57629	NM_146155	230793	Mm.31816	NM_146155	ENSMUSG00000037692	Ahdc1	D030015G18Rik	AT hook, DNA binding motif, containing 1	protein-coding
chr11	102184517	102185535	+	0	NA	intron (NM_172947, intron 1 of 4)	CpG	230	NM_172947	268490	Mm.259079	NM_172947	ENSMUSG00000020922	Lsm12	1110032E16Rik|1110059P07|2600001B17Rik	LSM12 homolog	protein-coding
chr5	30710502	30710843	+	0	NA	promoter-TSS (NM_023047)	promoter-TSS (NM_023047)	-892	NM_001356948	65254	Mm.27732	NM_023047	ENSMUSG00000029168	Dpysl5	CRAM|CRMP-5|Crmp5	dihydropyrimidinase-like 5	protein-coding
chr13	80940577	80941368	+	0	NA	intron (NR_103550, intron 1 of 4)	intron (NR_103550, intron 1 of 4)	569	NR_103550	71416	Mm.415500	NR_103550		5430425K12Rik	-	RIKEN cDNA 5430425K12 gene	ncRNA
chr4	137697559	137698236	+	0	NA	intron (NR_138594, intron 1 of 1)	intron (NR_138594, intron 1 of 1)	8709	NR_138594	69808	Mm.437203	NR_138594		Rap1gapos	1810058N05Rik	RAP1 GTPase activating protein, opposite strand	ncRNA
chr3	88536219	88537203	+	0	NA	promoter-TSS (NR_035434)	promoter-TSS (NR_035434)	-329	NR_035434	100316808		NR_035434	ENSMUSG00000084728	Mir1905	Mirn1905|mmu-mir-1905	microRNA 1905	ncRNA
chr8	124282000	124282328	+	0	NA	intron (NM_139272, intron 1 of 15)	intron (NM_139272, intron 1 of 15)	50770	NM_139272	108148	Mm.33808	NM_139272	ENSMUSG00000089704	Galnt2	AI480629	polypeptide N-acetylgalactosaminyltransferase 2	protein-coding
chr9	48050702	48051816	+	0	NA	Intergenic	B1_Mus2|SINE|Alu	-233051	NR_046048	100038460	Mm.447649	NR_046048		Gm10677	-	predicted gene 10677	ncRNA
chrX	53607287	53608955	+	0	NA	exon (NM_028375, exon 1 of 2)	exon (NM_028375, exon 1 of 2)	199	NM_028375	72865	Mm.158897	NM_028375	ENSMUSG00000051851	Rtl8c	2900027G03Rik|Cxx1c|Mar8.1|Mart8a	retrotransposon Gag like 8C	protein-coding
chr5	132249043	132249885	+	0	NA	intron (NM_001363480, intron 2 of 19)	intron (NM_001363480, intron 2 of 19)	293756	NM_001363480	319974	Mm.409595	NM_177047	ENSMUSG00000029673	Auts2	2700063G02Rik|A730011F23Rik|D830032G16Rik	autism susceptibility candidate 2	protein-coding
chr19	6991910	6992921	+	0	NA	TTS (NM_026675)	TTS (NM_026675)	103	NM_001356999	57431	Mm.10721	NM_020566	ENSMUSG00000024963	Dnajc4	Hspf2|Mcg18	DnaJ heat shock protein family (Hsp40) member C4	protein-coding
chr19	6235500	6236538	+	0	NA	promoter-TSS (NM_198168)	promoter-TSS (NM_198168)	-179	NM_198168	225849	Mm.118076	NM_198168	ENSMUSG00000024777	Ppp2r5b	B'beta|BC026670	protein phosphatase 2, regulatory subunit B', beta	protein-coding
chr5	31069851	31070482	+	0	NA	intron (NM_023525, intron 23 of 43)	intron (NM_023525, intron 23 of 43)	15386	NM_001289523	69719	Mm.305535	NM_023525	ENSMUSG00000013629	Cad	2410008J01Rik|AU018859|Cpad	carbamoyl-phosphate synthetase 2, aspartate transcarbamylase, and dihydroorotase	protein-coding
chr9	28386593	28387568	+	0	NA	Intergenic	Intergenic	-17248	NM_177906	330908	Mm.379474	NM_177906	ENSMUSG00000062257	Opcml	2900075O15Rik|3732419F12|AI844366|B930023M13Rik|C230027C17|Gm181|Obcam	opioid binding protein/cell adhesion molecule-like	protein-coding
chr11	77489662	77490123	+	0	NA	promoter-TSS (NM_172945)	promoter-TSS (NM_172945)	-214	NM_172945	268445	Mm.39296	NM_172945	ENSMUSG00000037907	Ankrd13b	AW124583|B930093C12Rik	ankyrin repeat domain 13b	protein-coding
chr5	129456766	129457046	+	0	NA	Intergenic	Intergenic	-44325	NM_001359952	231769	Mm.288714	NM_172276	ENSMUSG00000029439	Sfswap	1190005N23Rik|6330437E22Rik|AI197402|AW212079|SWAP|Sfrs8|Srsf8	splicing factor SWAP	protein-coding
chr13	54373879	54374418	+	0	NA	intron (NM_009946, intron 1 of 3)	intron (NM_009946, intron 1 of 3)	2799	NM_009946	12890	Mm.268902	NM_009946	ENSMUSG00000025867	Cplx2	921-L|AI413745|AW492120|Gm34843	complexin 2	protein-coding
chr11	69094678	69095327	+	0	NA	Intergenic	Intergenic	-3947	NM_011065	18626	Mm.7373	NM_011065	ENSMUSG00000020893	Per1	Hftm|Per|m-rigui|mPer1	period circadian clock 1	protein-coding
chr3	88225960	88226453	+	0	NA	Intergenic	Intergenic	-10536	NR_162800	114482879		NR_162800		Mir9b-1	mmu-mir-9b-1	microRNA mir-9b-1	ncRNA
chr10	15591960	15592582	+	0	NA	Intergenic	Intergenic	-199506	NR_131087	77538	Mm.128235	NR_131087	ENSMUSG00000112227	C330004P14Rik	-	RIKEN cDNA C330004P14 gene	ncRNA
chr5	33730916	33731661	+	0	NA	exon (NM_001163217, exon 7 of 17)	exon (NM_001163217, exon 7 of 17)	7516	NM_001359037	14184	Mm.6904	NM_008010	ENSMUSG00000054252	Fgfr3	CD333|FR3|Fgfr-3|Flg-2|HBGFR|Mfr3|sam3	fibroblast growth factor receptor 3	protein-coding
chr11	59964020	59965628	+	0	NA	5' UTR (NM_009026, exon 1 of 2)	5' UTR (NM_009026, exon 1 of 2)	120	NM_009026	19416	Mm.3903	NM_009026	ENSMUSG00000049892	Rasd1	Dexras1	RAS, dexamethasone-induced 1	protein-coding
chr4	138107696	138108234	+	0	NA	intron (NM_001355700, intron 7 of 30)	intron (NM_001355700, intron 7 of 30)	30553	NR_126429	73563	Mm.444294	NR_126429	ENSMUSG00000084804	1700095J12Rik	-	RIKEN cDNA 1700095J12 gene	ncRNA
chr4	138960022	138960261	+	0	NA	Intergenic	Intergenic	-6978	NM_025786	66825	Mm.252312	NM_025786	ENSMUSG00000070661	Rnf186	9130020G10Rik	ring finger protein 186	protein-coding
chr11	100870246	100870707	+	0	NA	intron (NM_001164062, intron 5 of 17)	intron (NM_001164062, intron 5 of 17)	9992	NM_001164062	20850	Mm.277403	NM_011488	ENSMUSG00000004043	Stat5a	AA959963|STAT5	signal transducer and activator of transcription 5A	protein-coding
chr13	90913323	90914615	+	0	NA	Intergenic	Intergenic	-8614	NM_001145879	435376	Mm.292579	NM_001145879	ENSMUSG00000078958	Atp6ap1l	EG435376	ATPase, H+ transporting, lysosomal accessory protein 1-like	protein-coding
chr9	21168691	21169031	+	0	NA	intron (NM_183408, intron 1 of 14)	intron (NM_183408, intron 1 of 14)	3147	NM_183408	18577	Mm.191749	NM_019798	ENSMUSG00000032177	Pde4a	D9Ertd60e|Dpde2	phosphodiesterase 4A, cAMP specific	protein-coding
chr15	79882631	79883808	+	0	NA	Intergenic	Intergenic	-9189	NM_001160415	80287	Mm.284059	NM_030255	ENSMUSG00000009585	Apobec3	Apobec|Arp3|BC003314|Cem15|Gm20117|Rfv3	apolipoprotein B mRNA editing enzyme, catalytic polypeptide 3	protein-coding
chr2	32451055	32452398	+	0	NA	promoter-TSS (NM_146118)	promoter-TSS (NM_146118)	-256	NM_146118	227731	Mm.37395	NM_146118	ENSMUSG00000026819	Slc25a25	1110030N17Rik|MCSC|mKIAA1896	solute carrier family 25 (mitochondrial carrier, phosphate carrier), member 25	protein-coding
chr6	17463340	17464405	+	0	NA	promoter-TSS (NM_008591)	promoter-TSS (NM_008591)	-85	NM_008591	17295	Mm.86844	NM_008591	ENSMUSG00000009376	Met	AI838057|HGF|HGFR|Par4|c-Met	met proto-oncogene	protein-coding
chr14	41984746	41985368	+	0	NA	Intergenic	Intergenic	60108	NM_001358038	666214		NM_001358038		1700049E17Rik1	1700049E17Rik	RIKEN cDNA 1700049E17 gene, gene 1	protein-coding
chr11	77630132	77630681	+	0	NA	Intergenic	Intergenic	-22591	NM_001364134	216965	Mm.340436	NM_144825	ENSMUSG00000017291	Taok1	2810468K05Rik|AU020252|D130018F14Rik|Map3k16|Markk|Psk2	TAO kinase 1	protein-coding
chr5	125041481	125042128	+	0	NA	exon (NM_011424, exon 23 of 47)	exon (NM_011424, exon 23 of 47)	38356	NM_028443	73121	Mm.296138	NM_028443	ENSMUSG00000037962	Rflna	3110032G18Rik|Fam101a|cfm|cfm2	refilin A	protein-coding
chr11	75291475	75292427	+	0	NA	Intergenic	Intergenic	56432	NM_026653	68275	Mm.102574	NM_026653	ENSMUSG00000000751	Rpa1	5031405K23Rik|70kDa|AA589576|AW557552|RF-A|RP-A|Rpa	replication protein A1	protein-coding
chr15	101310922	101311378	+	0	NA	Intergenic	Intergenic	17925	NM_001369218	77717	Mm.391998	NM_001369218	ENSMUSG00000075408	Smim41	6030408B16Rik|AI225877	small integral membrane protein 41	protein-coding
chr11	103267077	103268119	+	0	NA	promoter-TSS (NM_016896)	promoter-TSS (NM_016896)	-197	NM_016896	53859	Mm.158981	NM_016896	ENSMUSG00000020941	Map3k14	Nik|aly	mitogen-activated protein kinase kinase kinase 14	protein-coding
chr7	99267202	99268720	+	0	NA	promoter-TSS (NR_103487)	promoter-TSS (NR_103487)	-385	NM_001043355	17760	Mm.154087	NM_010837	ENSMUSG00000055407	Map6	2810411E12Rik|Map-6|Mtap6|STOP	microtubule-associated protein 6	protein-coding
chr11	118197717	118198341	+	0	NA	intron (NM_001112699, intron 1 of 12)	intron (NM_001112699, intron 1 of 12)	14713	NM_001112700	19157	Mm.86413	NM_011180	ENSMUSG00000017132	Cyth1	CLM1|CTH-1|CYTIP|Pscd1	cytohesin 1	protein-coding
chr7	113619242	113620354	+	0	NA	Intergenic	Intergenic	-54811	NR_126544	69295	Mm.396150	NR_126544	ENSMUSG00000084984	Far1os	1700006P19Rik	fatty acyl CoA reductase 1, opposite strand	ncRNA
chr8	124184030	124184765	+	0	NA	Intergenic	Intergenic	-46997	NM_139272	108148	Mm.33808	NM_139272	ENSMUSG00000089704	Galnt2	AI480629	polypeptide N-acetylgalactosaminyltransferase 2	protein-coding
chr6	14358203	14358952	+	0	NA	Intergenic	Intergenic	396697	NM_080464	140491	Mm.209429	NM_080464	ENSMUSG00000042717	Ppp1r3a	GM|RG1|RGL	protein phosphatase 1, regulatory subunit 3A	protein-coding
chr5	130583879	130584518	+	0	NA	intron (NM_181045, intron 3 of 6)	intron (NM_181045, intron 3 of 6)	135406	NM_021371	140904	Mm.40875	NM_021371	ENSMUSG00000060371	Caln1	9630012C17Rik|Cabp8|MNCb-0849	calneuron 1	protein-coding
chr1	26062375	26063165	+	0	NA	Intergenic	Intergenic	-233063	NM_175642	210933	Mm.336569	NM_175642	ENSMUSG00000033569	Adgrb3	A830096D10Rik|Bai3	adhesion G protein-coupled receptor B3	protein-coding
chr6	23528001	23528580	+	0	NA	intron (NM_153163, intron 6 of 29)	intron (NM_153163, intron 6 of 29)	122015	NM_198251	386611	Mm.436547	NM_198251	ENSMUSG00000051956	Rnf133	Greul2	ring finger protein 133	protein-coding
chr13	116988531	116989118	+	0	NA	intron (NM_001081009, intron 3 of 26)	intron (NM_001081009, intron 3 of 26)	36707	NM_001081009	52552	Mm.274466	NM_027272	ENSMUSG00000021725	Parp8	2810430O08Rik|ARTD16|D13Ertd275e	poly (ADP-ribose) polymerase family, member 8	protein-coding
chr15	73791759	73792294	+	0	NA	intron (NM_001033365, intron 5 of 10)	intron (NM_001033365, intron 5 of 10)	17907	NM_001362047	100041273	Mm.379154	NM_001362047		Ndufb4c	Gm3244	NADH:ubiquinone oxidoreductase subunit B4C	protein-coding
chr9	66999654	67000009	+	0	NA	Intergenic	Intergenic	-24347	NM_030717	80907	Mm.157882	NM_030717	ENSMUSG00000032370	Lactb	LACT-1|Lact1|Mrpl56	lactamase, beta	protein-coding
chr11	121420913	121421820	+	0	NA	promoter-TSS (NM_181420)	promoter-TSS (NM_181420)	-7	NM_181420	238024	Mm.117394	NM_181420	ENSMUSG00000039253	Fn3krp	FN3K-RP	fructosamine 3 kinase related protein	protein-coding
chr13	80957650	80958352	+	0	NA	Intergenic	Intergenic	-6073	NR_015587	319983	Mm.343027	NR_015587	ENSMUSG00000097098	9330111N05Rik	-	RIKEN cDNA 9330111N05 gene	ncRNA
chr11	104088530	104088817	+	0	NA	Intergenic	L1MD1|LINE|L1	-44108	NM_001313929	12921	Mm.1892	NM_007762	ENSMUSG00000018634	Crhr1	CRF1R|CRFR1|Crhr	corticotropin releasing hormone receptor 1	protein-coding
chr7	46348848	46349564	+	0	NA	Intergenic	Intergenic	-22197	NR_131190	105447647		NR_131190		Gm45923	DRReRNA|Munc	predicted gene, 45923	ncRNA
chr3	133243811	133244529	+	0	NA	Intergenic	Intergenic	-9221	NM_001368752	77669	Mm.98630	NM_029953	ENSMUSG00000040969	Arhgef38	9130221D24Rik|D630013G24Rik	Rho guanine nucleotide exchange factor (GEF) 38	protein-coding
chr11	51643518	51644023	+	0	NA	exon (NM_145974, exon 5 of 5)	exon (NM_145974, exon 5 of 5)	-7184	NR_027958	97775	Mm.220299	NM_175289	ENSMUSG00000052563	D930048N14Rik	AI315703|R75254	RIKEN cDNA D930048N14 gene	ncRNA
chr16	63743259	63743878	+	0	NA	intron (NM_001362452, intron 3 of 16)	intron (NM_001362452, intron 3 of 16)	120607	NM_001362452	13837	Mm.1977	NM_010140	ENSMUSG00000052504	Epha3	AW492086|Cek4|EK4|ETK1|End3|Hek|Hek4|Mek4|Tyro4	Eph receptor A3	protein-coding
chr4	133508912	133509367	+	0	NA	Intergenic	Intergenic	-9824	NM_001083916	69073	Mm.299081	NM_133707	ENSMUSG00000037600	Kdf1	1810019J16Rik	keratinocyte differentiation factor 1	protein-coding
chr14	86676788	86677565	+	0	NA	intron (NM_019670, intron 27 of 27)	intron (NM_019670, intron 27 of 27)	431206	NR_040457	75155	Mm.399239	NR_040457	ENSMUSG00000115271	4930529K09Rik	4930507G21Rik	RIKEN cDNA 4930529K09 gene	ncRNA
chr13	116759640	116760395	+	0	NA	Intergenic	Intergenic	78161	NR_153406	74680	Mm.488118	NR_153406	ENSMUSG00000114290	4930435F18Rik	-	RIKEN cDNA 4930435F18 gene	ncRNA
chr4	106704266	106704932	+	0	NA	intron (NM_001126487, intron 10 of 23)	intron (NM_001126487, intron 10 of 23)	23331	NM_001126487	381538	Mm.318201	NM_001126487	ENSMUSG00000047502	Mroh7	Gm1027|Heatr8	maestro heat-like repeat family member 7	protein-coding
chr4	127689942	127690288	+	0	NA	Intergenic	Intergenic	280726	NM_001134733	635169	Mm.346755	NM_001134733	ENSMUSG00000028813	CK137956	-	cDNA sequence CK137956	protein-coding
chr15	79763647	79763903	+	0	NA	intron (NM_017470, intron 2 of 3)	intron (NM_017470, intron 2 of 3)	10692	NM_017470	54152	Mm.288159	NM_017470	ENSMUSG00000022420	Dnal4	D15Ertd424e|Dnalc4	dynein, axonemal, light chain 4	protein-coding
chr4	133484267	133484947	+	0	NA	intron (NM_175307, intron 1 of 1)	intron (NM_175307, intron 1 of 1)	4474	NM_175307	100342	Mm.204656	NM_175307	ENSMUSG00000046694	Tent5b	4732473B16Rik|AU045678|AU046069|Fam46b	terminal nucleotidyltransferase 5B	protein-coding
chr1	91458977	91459811	+	0	NA	promoter-TSS (NM_011066)	promoter-TSS (NM_011066)	-66	NM_011066	18627	Mm.482463	NM_011066	ENSMUSG00000055866	Per2	mKIAA0347|mPer2	period circadian clock 2	protein-coding
chr11	79973772	79974596	+	0	NA	Intergenic	Intergenic	-11797	NM_144826	216987	Mm.274961	NM_144826	ENSMUSG00000035575	Utp6	4732497O03Rik|HCA66	UTP6 small subunit processome component	protein-coding
chr10	13567617	13568119	+	0	NA	Intergenic	Intergenic	-14726	NM_019961	56535	Mm.282711	NM_019961	ENSMUSG00000019809	Pex3	1700014F15Rik|2810027F19Rik|2900010N04Rik	peroxisomal biogenesis factor 3	protein-coding
chr12	82230982	82231643	+	0	NA	intron (NM_001167983, intron 1 of 23)	intron (NM_001167983, intron 1 of 23)	61296	NM_001167983	217692	Mm.261333	NM_172579	ENSMUSG00000042700	Sipa1l1	4931426N11Rik|AW213287|Spar|mKIAA0440	signal-induced proliferation-associated 1 like 1	protein-coding
chr8	52402028	52402434	+	0	NA	intron (NR_151738, intron 3 of 3)	intron (NR_151738, intron 3 of 3)	45620	NR_151738	330767	Mm.246790	NR_151738	ENSMUSG00000110013	1190028D05Rik	-	RIKEN cDNA 1190028D05 gene	ncRNA
chr9	113057441	113057712	+	0	NA	Intergenic	Intergenic	529576	NR_040760	102688	Mm.394901	NR_040760	ENSMUSG00000109890	AU023762	-	expressed sequence AU023762	ncRNA
chr2	29488613	29489343	+	0	NA	intron (NM_001290489, intron 3 of 6)	intron (NM_001290489, intron 3 of 6)	-13684	NR_105753	102465170		NR_105753	ENSMUSG00000098539	Mir133c	Gm27865|mmu-mir-133c	microRNA 133c	ncRNA
chr5	118128160	118129066	+	0	NA	intron (NM_172721, intron 3 of 10)	intron (NM_172721, intron 3 of 10)	26845	NM_172721	231672	Mm.221769	NM_172721	ENSMUSG00000032867	Fbxw8	4930438M06Rik|FBW6|FBW8|FBXO29|Fbx29	F-box and WD-40 domain protein 8	protein-coding
chr11	86614167	86614431	+	0	NA	intron (NM_029478, intron 7 of 11)	intron (NM_029478, intron 7 of 11)	-30141	NR_029738	387140		NR_029738	ENSMUSG00000065455	Mir21a	Mir21|Mirn21|mmu-mir-21|mmu-mir-21a	microRNA 21a	ncRNA
chr7	112204511	112205192	+	0	NA	Intergenic	Intergenic	-20985	NM_001193305	320878	Mm.52312	NM_177282	ENSMUSG00000038244	Mical2	5330438E18Rik|9530064J02|MICAL-2|mKIAA0750	microtubule associated monooxygenase, calponin and LIM domain containing 2	protein-coding
chr11	87278728	87279335	+	0	NA	intron (NM_177167, intron 1 of 6)	intron (NM_177167, intron 1 of 6)	79963	NM_177167	320472	Mm.341988	NM_177167	ENSMUSG00000046442	Ppm1e	AW049266|B930008A12Rik|POPX1|PP2CH|mKIAA1072	protein phosphatase 1E (PP2C domain containing)	protein-coding
chr19	5875045	5875585	+	0	NA	promoter-TSS (NM_026169)	promoter-TSS (NM_026169)	-107	NM_026169	67457	Mm.202092	NM_026169	ENSMUSG00000024816	Frmd8	1200004M23Rik|2310035N23Rik|4931429L16Rik|AU018809|iTAP	FERM domain containing 8	protein-coding
chr16	9280708	9281569	+	0	NA	Intergenic	Intergenic	451038	NM_001081400	69053	Mm.390868	NM_001081400	ENSMUSG00000022507	1810013L24Rik	1110017P05Rik|3010002C02Rik|AA792997|AW124177|Gm19906|R74903	RIKEN cDNA 1810013L24 gene	protein-coding
chrX	122884241	122885078	+	0	NA	Intergenic	Intergenic	-218864	NM_028426	73061	Mm.292979	NM_028426	ENSMUSG00000079450	Cldn34c1	3110007F17Rik	claudin 34C1	protein-coding
chr4	6452456	6454466	+	0	NA	intron (NM_010945, intron 1 of 30)	intron (NM_010945, intron 1 of 30)	810	NM_010945	18201	Mm.3059	NM_010945	ENSMUSG00000028245	Nsmaf	AA959567|C630007J05|Fan	neutral sphingomyelinase (N-SMase) activation associated factor	protein-coding
chr1	49942159	49942582	+	0	NA	Intergenic	Intergenic	697754	NR_151585	442837	Mm.337149	NM_001002792	ENSMUSG00000051616	C230029F24Rik	-	RIKEN cDNA C230029F24 gene	ncRNA
chr4	54034828	54035496	+	0	NA	Intergenic	(CACAG)n|Simple_repeat|Simple_repeat	209117	NM_028053	52076	Mm.27184	NM_028053	ENSMUSG00000028420	Tmem38b	1600017F22Rik|AA437809|AV051057|D4Ertd89e|TRIC-B|mg33b	transmembrane protein 38B	protein-coding
chr17	47368636	47369310	+	0	NA	promoter-TSS (NM_001146212)	promoter-TSS (NM_001146212)	86	NM_001146212	64657	Mm.216250	NM_183086	ENSMUSG00000034729	Mrps10	1110038B19Rik|AW743084|Rpms10	mitochondrial ribosomal protein S10	protein-coding
chr14	64403868	64404487	+	0	NA	intron (NM_001253712, intron 1 of 5)	intron (NM_001253712, intron 1 of 5)	12779	NM_001253716	110265	Mm.26713	NM_026322	ENSMUSG00000054733	Msra	2310045J23Rik|6530413P12Rik|MSR-A	methionine sulfoxide reductase A	protein-coding
chr19	17785524	17786110	+	0	NA	intron (NM_001190483, intron 2 of 37)	intron (NM_001190483, intron 2 of 37)	51815	NM_001163144	18552	Mm.3401	NM_001163144	ENSMUSG00000024713	Pcsk5	PC5|PC6|SPC6|b2b1549Clo|b2b585Clo	proprotein convertase subtilisin/kexin type 5	protein-coding
chr4	96075696	96076162	+	0	NA	intron (NM_001346539, intron 1 of 7)	intron (NM_001346539, intron 1 of 7)	1611	NM_145548	230459	Mm.268175	NM_145548	ENSMUSG00000028571	Cyp2j13	-	cytochrome P450, family 2, subfamily j, polypeptide 13	protein-coding
chr5	35042999	35043624	+	0	NA	intron (NM_019447, intron 4 of 13)	intron (NM_019447, intron 4 of 13)	1802	NM_019447	54426	Mm.27369	NM_019447	ENSMUSG00000029102	Hgfac	HGFA	hepatocyte growth factor activator	protein-coding
chr4	49946827	49947351	+	0	NA	Intergenic	Intergenic	-101320	NM_001033351	242443	Mm.440095	NM_001033351	ENSMUSG00000039579	Grin3a	6430537F04|A830097C19Rik|NMDAR-L|NR3A|mKIAA1973	glutamate receptor ionotropic, NMDA3A	protein-coding
chr11	77686828	77687648	+	0	NA	intron (NM_001024205, intron 1 of 3)	CpG	1099	NM_001024205	68564	Mm.428996	NM_001024205	ENSMUSG00000037857	Nufip2	1110001M19Rik|9530056D24Rik|AI256692|AI461731|PIG1|mKIAA1321	nuclear fragile X mental retardation protein interacting protein 2	protein-coding
chr13	56265488	56266693	+	0	NA	Intergenic	Intergenic	-13910	NM_010896	18014	Mm.266665	NM_010896	ENSMUSG00000048904	Neurog1	AKA|Math4C|Neurod3|bHLHa6|ngn1	neurogenin 1	protein-coding
chr14	81830259	81830639	+	0	NA	Intergenic	Intergenic	1830147	NM_001351947	380924	Mm.26456	NM_001030294	ENSMUSG00000022026	Olfm4	GC1|GW112|Gm296|Gm913|OlfD|pPD4	olfactomedin 4	protein-coding
chr5	127990685	127991340	+	0	NA	intron (NM_172885, intron 3 of 8)	(TG)n|Simple_repeat|Simple_repeat	358750	NM_177005	319804	Mm.237888	NM_177005	ENSMUSG00000049971	Glt1d1	5730455A04Rik	glycosyltransferase 1 domain containing 1	protein-coding
chr2	28068389	28069065	+	0	NA	Intergenic	Intergenic	16151	NM_010190	14134	Mm.182935	NM_010190	ENSMUSG00000026835	Fcnb	Fcn2	ficolin B	protein-coding
chr19	5815027	5815244	+	0	NA	Intergenic	Intergenic	-12463	NR_002847	72289	Mm.298256	NR_002847	ENSMUSG00000092341	Malat1	2210401K01Rik|9430072K23Rik|AI647968|Neat2	metastasis associated lung adenocarcinoma transcript 1 (non-coding RNA)	ncRNA
chr1	138751922	138752606	+	0	NA	Intergenic	Intergenic	-70189	NR_040304	545363	Mm.362817	NR_040304	ENSMUSG00000100459	Gm5833	-	predicted gene 5833	ncRNA
chr19	7108100	7108793	+	0	NA	intron (NM_134147, intron 3 of 10)	intron (NM_134147, intron 3 of 10)	-2717	NM_201411	396184	Mm.386930	NM_201411	ENSMUSG00000047787	Flrt1	AW742165|D630040I23Rik	fibronectin leucine rich transmembrane protein 1	protein-coding
chr17	26533819	26534105	+	0	NA	Intergenic	Intergenic	-25490	NM_013642	19252	Mm.239041	NM_013642	ENSMUSG00000024190	Dusp1	3CH134|MKP1|Ptpn16|U19515|erp|mkp-1	dual specificity phosphatase 1	protein-coding
chrX	133868548	133869291	+	0	NA	Intergenic	Intergenic	17911	NM_022322	64103	Mm.46221	NM_022322	ENSMUSG00000031250	Tnmd	1110017I01Rik|Bricd4|ChM1L|TeM	tenomodulin	protein-coding
chr1	91086113	91086939	+	0	NA	intron (NM_008515, intron 7 of 22)	intron (NM_008515, intron 7 of 22)	33082	NM_001111311	16978	Mm.45039	NM_008515	ENSMUSG00000026305	Lrrfip1	AU024550|Fliiap1	leucine rich repeat (in FLII) interacting protein 1	protein-coding
chr1	67021492	67022508	+	0	NA	intron (NM_001190985, intron 2 of 8)	intron (NM_001190985, intron 2 of 8)	16834	NM_001190984	14768	Mm.20522	NM_021295	ENSMUSG00000026000	Lancl1	AW124738|Gpr69|Gpr69a|p40	LanC (bacterial lantibiotic synthetase component C)-like 1	protein-coding
chr9	47761418	47762114	+	0	NA	intron (NM_001025600, intron 1 of 8)	intron (NM_001025600, intron 1 of 8)	56442	NR_046048	100038460	Mm.447649	NR_046048		Gm10677	-	predicted gene 10677	ncRNA
chr2	7530560	7530843	+	0	NA	Intergenic	Intergenic	-134503	NM_001110231	14007	Mm.398543	NM_010160	ENSMUSG00000002107	Celf2	B230218O03|B230345P09Rik|C88023|CELF-2|CUG-BP2|Cugbp2|D230046B21Rik|Etr-3|Napor|Napor-2|mETR-3	CUGBP, Elav-like family member 2	protein-coding
chr5	115666302	115666794	+	0	NA	intron (NR_151598, intron 5 of 11)	intron (NR_151598, intron 5 of 11)	-12962	NR_151601	75665	Mm.233914	NM_001080808	ENSMUSG00000041609	Bicdl1	2210403N09Rik|BICDR-1|Ccdc64	BICD family like cargo adaptor 1	protein-coding
chr4	155343679	155346069	+	0	NA	promoter-TSS (NM_001355178)	promoter-TSS (NM_001355178)	-125	NM_001355178	18762	Mm.28561	NM_008860	ENSMUSG00000029053	Prkcz	AI098070|C80388|Pkcz|R74924|aPKCzeta|nPKC-zeta|zetaPKC	protein kinase C, zeta	protein-coding
chr11	98846990	98847597	+	0	NA	exon (NM_001080925, exon 8 of 15)	exon (NM_001080925, exon 8 of 15)	10508	NM_001080925	268480	Mm.340766	NM_001080925	ENSMUSG00000038020	Rapgefl1	B230105J10	Rap guanine nucleotide exchange factor (GEF)-like 1	protein-coding
chr5	128800595	128801022	+	0	NA	intron (NM_001310733, intron 9 of 20)	intron (NM_001310733, intron 9 of 20)	64562	NM_021311	57749	Mm.272720	NM_021311	ENSMUSG00000029423	Piwil1	MIWI	piwi-like RNA-mediated gene silencing 1	protein-coding
chr11	19524906	19525381	+	0	NA	Intergenic	Intergenic	-399299	NM_033523	114716	Mm.266627	NM_033523	ENSMUSG00000045671	Spred2	C79158	sprouty-related EVH1 domain containing 2	protein-coding
chr9	62550556	62550897	+	0	NA	Intergenic	Intergenic	-13682	NM_175484	235431	Mm.335229	NM_175484	ENSMUSG00000041729	Coro2b	CLIPINC|E130012P22Rik	coronin, actin binding protein, 2B	protein-coding
chr2	32712287	32713942	+	0	NA	promoter-TSS (NR_037217)	promoter-TSS (NR_037217)	-142	NR_039536	100628606		NR_039536	ENSMUSG00000105841	Mir3960	mmu-mir-3960	microRNA 3960	ncRNA
chr9	113248567	113249349	+	0	NA	Intergenic	Intergenic	338194	NR_040760	102688	Mm.394901	NR_040760	ENSMUSG00000109890	AU023762	-	expressed sequence AU023762	ncRNA
chr6	35567617	35568009	+	0	NA	Intergenic	L2a|LINE|L2	-27925	NM_008098	14489	Mm.182746	NM_008098	ENSMUSG00000029840	Mtpn	5033418D15Rik|Gcdp|V1	myotrophin	protein-coding
chr11	116489780	116490902	+	0	NA	promoter-TSS (NM_026364)	promoter-TSS (NM_026364)	5	NM_026364	67763	Mm.25125	NM_026364	ENSMUSG00000015869	Prpsap1	5730409F23Rik|PAP39	phosphoribosyl pyrophosphate synthetase-associated protein 1	protein-coding
chr4	148448244	148448942	+	0	NA	promoter-TSS (NM_020009)	promoter-TSS (NM_020009)	11	NM_020009	56717	Mm.21158	NM_020009	ENSMUSG00000028991	Mtor	2610315D21Rik|AI327068|FRAP|FRAP2|Frap1|RAFT1|RAPT1|flat	mechanistic target of rapamycin kinase	protein-coding
chr11	77832453	77833070	+	0	NA	intron (NM_001291212, intron 20 of 40)	intron (NM_001291212, intron 20 of 40)	31463	NM_001291214	360013	Mm.341248	NM_011586	ENSMUSG00000000631	Myo18a	MAJN|MyoPDZ|MysPDZ|SP-R210	myosin XVIIIA	protein-coding
chr12	107142142	107142875	+	0	NA	Intergenic	Intergenic	-426184	NR_015512	71033	Mm.159404	NR_015512	ENSMUSG00000085820	4933406K04Rik	4930426M03Rik|4930485I22Rik|4933427G14Rik	RIKEN cDNA 4933406K04 gene	ncRNA
chr11	77507571	77508706	+	0	NA	TTS (NM_001024920)	TTS (NM_001024920)	5135	NM_001024920	216964	Mm.341211	NM_001024920	ENSMUSG00000044328	Trp53i13	2410019G02Rik|Tp53i13	transformation related protein 53 inducible protein 13	protein-coding
chr16	80397906	80398491	+	0	NA	Intergenic	Intergenic	398822	NM_030146	78654		NM_030146		1700066C05Rik	-	RIKEN cDNA 1700066C05 gene	protein-coding
chr2	157748043	157748423	+	0	NA	intron (NM_025680, intron 1 of 15)	intron (NM_025680, intron 1 of 15)	10832	NM_025680	66642	Mm.45193	NM_025680	ENSMUSG00000027649	Ctnnbl1	5730471K09Rik|NAP|NYD-SP19|P14L	catenin, beta like 1	protein-coding
chr10	63608648	63609604	+	0	NA	intron (NM_177612, intron 5 of 17)	intron (NM_177612, intron 5 of 17)	151615	NM_001164376	216033	Mm.444692	NM_177612	ENSMUSG00000060843	Ctnna3	4930429L08Rik|4933408A16|Catna3|Vr22	catenin (cadherin associated protein), alpha 3	protein-coding
chr16	6963366	6964007	+	0	NA	intron (NM_001359725, intron 5 of 16)	RMER15|LTR|ERVL	-75684	NM_001359729	268859	Mm.370334	NM_021477	ENSMUSG00000008658	Rbfox1	A2bp|A2bp1|Hrnbp1|fox-1	RNA binding protein, fox-1 homolog (C. elegans) 1	protein-coding
chr2	180256763	180257857	+	0	NA	promoter-TSS (NM_001355518)	promoter-TSS (NM_001355518)	-69	NM_001355520	66481	Mm.289669	NM_025587	ENSMUSG00000039001	Rps21	1810049N11Rik|2410030A14Rik	ribosomal protein S21	protein-coding
chr6	26931969	26932388	+	0	NA	Intergenic	Intergenic	1000752	NR_040771	626904	Mm.126787	NR_040771	ENSMUSG00000106799	Gm20756	-	predicted gene, 20756	ncRNA
chr8	70322407	70322733	+	0	NA	exon (NM_138647, exon 4 of 8)	exon (NM_138647, exon 4 of 8)	6795	NM_001163282	14559	Mm.258280	NM_008107	ENSMUSG00000087408	Gdf1	AI385651|Gdf-1	growth differentiation factor 1	protein-coding
chr4	152226748	152227630	+	0	NA	intron (NM_001369275, intron 4 of 8)	intron (NM_001369275, intron 4 of 8)	27345	NM_001146058	70025	Mm.296191	NM_133348	ENSMUSG00000028937	Acot7	2410041A17Rik|Ach1|Act|Bach|CTE-IIa|Cte-II|Lach1	acyl-CoA thioesterase 7	protein-coding
chr4	150568866	150570532	+	0	NA	intron (NM_001085492, intron 11 of 22)	CpG	82475	NM_173774	242773	Mm.29280	NM_173774	ENSMUSG00000039838	Slc45a1	C230078B22|Dnb5	solute carrier family 45, member 1	protein-coding
chr14	44742731	44743286	+	0	NA	Intergenic	Intergenic	-18021	NM_001162954	666744	Mm.387002	NM_001162954	ENSMUSG00000091923	Gm8267	EG666744	predicted gene 8267	protein-coding
chr2	154568945	154570316	+	0	NA	promoter-TSS (NM_001291105)	promoter-TSS (NM_001291105)	-204	NM_001291105	13555	Mm.18036	NM_007891	ENSMUSG00000027490	E2f1	E2F-1|Tg(Wnt1-cre)2Sor|mKIAA4009	E2F transcription factor 1	protein-coding
chr5	135077775	135078632	+	0	NA	promoter-TSS (NM_001199677)	promoter-TSS (NM_001199677)	63	NM_177574	194309	Mm.44356	NM_177574	ENSMUSG00000043614	Vps37d	Wbscr24	vacuolar protein sorting 37D	protein-coding
chr3	13945911	13947391	+	0	NA	intron (NM_001163329, intron 1 of 7)	intron (NM_001163329, intron 1 of 7)	346	NM_001163330	76897	Mm.422625	NM_178631	ENSMUSG00000039717	Ralyl	0710005M24Rik	RALY RNA binding protein-like	protein-coding
chr6	14408493	14409029	+	0	NA	Intergenic	Intergenic	346513	NM_080464	140491	Mm.209429	NM_080464	ENSMUSG00000042717	Ppp1r3a	GM|RG1|RGL	protein phosphatase 1, regulatory subunit 3A	protein-coding
chr3	73445629	73445995	+	0	NA	intron (NR_040547, intron 2 of 7)	Lx10|LINE|L1	35839	NR_040547	74693	Mm.292227	NR_040547	ENSMUSG00000102362	4930509J09Rik	-	RIKEN cDNA 4930509J09 gene	ncRNA
chr18	85012937	85013452	+	0	NA	Intergenic	Intergenic	61078	NM_001367965	50764	Mm.28369	NM_015798	ENSMUSG00000034391	Fbxo15	AU019763|Fbx15|ecat3	F-box protein 15	protein-coding
chrX	116796567	116797372	+	0	NA	Intergenic	L1_Mus3|LINE|L1	115791	NM_001281530	624153		NM_001281530	ENSMUSG00000082482	H2afb2	EG624153|H2A.Bbd4|H2afb2-ps	H2A histone family, member B2	protein-coding
chr7	131560036	131560879	+	0	NA	promoter-TSS (NM_001317350)	promoter-TSS (NM_001317350)	-37	NM_001317350	12237	Mm.927	NM_009774	ENSMUSG00000066979	Bub3	AU019800|AU021329|AU043350|AW146323|C78067	BUB3 mitotic checkpoint protein	protein-coding
chr19	6263958	6264791	+	0	NA	promoter-TSS (NR_029830)	promoter-TSS (NR_029830)	-269	NR_029830	723957		NR_029830	ENSMUSG00000065582	Mir194-2	Mirn194-2|mir-194-2	microRNA 194-2	ncRNA
chr5	112517404	112517848	+	0	NA	intron (NM_001253917, intron 1 of 15)	intron (NM_001253917, intron 1 of 15)	59572	NM_001253917	56747	Mm.143742	NM_019982	ENSMUSG00000058153	Sez6l	AI843918|AIG1|AW539724|Acig1|BSRP-B|mKIAA0927	seizure related 6 homolog like	protein-coding
chr4	123382999	123383737	+	0	NA	exon (NM_001199137, exon 66 of 93)	exon (NM_001199137, exon 66 of 93)	28543	NM_001167918	442834	Mm.483803	NM_001167918		D830031N03Rik	Kiaa0754|mKIAA0754	RIKEN cDNA D830031N03 gene	protein-coding
chr6	7660635	7661174	+	0	NA	Intergenic	Intergenic	32305	NM_012055	27053	Mm.2942	NM_012055	ENSMUSG00000029752	Asns	-	asparagine synthetase	protein-coding
chr11	50265909	50266383	+	0	NA	exon (NM_175334, exon 2 of 5)	exon (NM_175334, exon 2 of 5)	26190	NM_175334	103806	Mm.51116	NM_175334	ENSMUSG00000050567	Maml1	AI644666|AW743257|D930008C07Rik|Mam-1|Mam1|mKIAA0200	mastermind like transcriptional coactivator 1	protein-coding
chr4	155361070	155361862	+	0	NA	promoter-TSS (NM_008860)	promoter-TSS (NM_008860)	-38	NM_008860	18762	Mm.28561	NM_008860	ENSMUSG00000029053	Prkcz	AI098070|C80388|Pkcz|R74924|aPKCzeta|nPKC-zeta|zetaPKC	protein kinase C, zeta	protein-coding
chr9	80324224	80324568	+	0	NA	intron (NM_022016, intron 14 of 16)	intron (NM_022016, intron 14 of 16)	141042	NM_022016	63859	Mm.422780	NM_022016	ENSMUSG00000032343	Impg1	A930015H12Rik|IMP150|SPACR	interphotoreceptor matrix proteoglycan 1	protein-coding
chr15	73999760	74000097	+	0	NA	Intergenic	Intergenic	-160257	NM_001033365	268816	Mm.440635	NM_001033365	ENSMUSG00000072487	Mroh5	Gm628	maestro heat-like repeat family member 5	protein-coding
chr6	70240041	70241024	+	0	NA	Intergenic	Intergenic	551643	NM_009075	19895	Mm.17905	NM_009075	ENSMUSG00000053604	Rpia	RPI	ribose 5-phosphate isomerase A	protein-coding
chr2	164967337	164968883	+	0	NA	5' UTR (NM_020333, exon 1 of 26)	5' UTR (NM_020333, exon 1 of 26)	122	NM_020333	57138	Mm.252987	NM_020333	ENSMUSG00000017740	Slc12a5	KCC2|mKIAA1176	solute carrier family 12, member 5	protein-coding
chr1	18766328	18766781	+	0	NA	Intergenic	Intergenic	-336468	NM_153154	226896	Mm.244858	NM_153154	ENSMUSG00000042596	Tfap2d	Tcfap2d	transcription factor AP-2, delta	protein-coding
chr9	44334371	44335589	+	0	NA	exon (NM_010436, exon 1 of 1)	exon (NM_010436, exon 1 of 1)	265	NM_010436	15270	Mm.245931	NM_010436	ENSMUSG00000049932	H2afx	AW228881|H2A.X|H2ax|Hist5-2ax|gammaH2ax	H2A histone family, member X	protein-coding
chr7	4900214	4900681	+	0	NA	intron (NM_001370858, intron 1 of 1)	B3A|SINE|B2	7270	NM_001370858	102640043		NM_001370858	ENSMUSG00000110221	Gm36210	-	predicted gene, 36210	protein-coding
chr13	54331795	54332662	+	0	NA	intron (NM_001362218, intron 2 of 4)	intron (NM_001362218, intron 2 of 4)	29672	NM_001362218	12890	Mm.268902	NM_009946	ENSMUSG00000025867	Cplx2	921-L|AI413745|AW492120|Gm34843	complexin 2	protein-coding
chr18	39187498	39188564	+	0	NA	intron (NM_175164, intron 11 of 22)	intron (NM_175164, intron 11 of 22)	194886	NM_175164	71302	Mm.329396	NM_175164	ENSMUSG00000036452	Arhgap26	1810044B20Rik|2610010G17Rik|4933432P15Rik|AI853435|mKIAA0621	Rho GTPase activating protein 26	protein-coding
chr8	17602881	17603247	+	0	NA	Intergenic	Intergenic	-67679	NM_053171	94109	Mm.436988	NM_053171	ENSMUSG00000060924	Csmd1	B930082H09|mKIAA1890	CUB and Sushi multiple domains 1	protein-coding
chr11	13689099	13689602	+	0	NA	Intergenic	Intergenic	489691	NR_131011	75280	Mm.108492	NR_131011	ENSMUSG00000085452	4930554G24Rik	-	RIKEN cDNA 4930554G24 gene	ncRNA
chrX	129849979	129850560	+	0	NA	intron (NM_172493, intron 4 of 26)	intron (NM_172493, intron 4 of 26)	100527	NM_172493	54004	Mm.10763	NM_017398	ENSMUSG00000034480	Diaph2	Dia3|Diap2|Drf2|E430022I22Rik	diaphanous related formin 2	protein-coding
chr19	46374477	46375143	+	0	NA	3' UTR (NM_029186, exon 9 of 9)	3' UTR (NM_029186, exon 9 of 9)	17930	NM_029186	75146	Mm.159290	NM_029186	ENSMUSG00000025227	Mfsd13a	4930449A08Rik|4930538D17Rik|Tmem180	major facilitator superfamily domain containing 13a	protein-coding
chr9	59655990	59656928	+	0	NA	promoter-TSS (NM_001253883)	promoter-TSS (NM_001253883)	91	NM_011099	18746	Mm.326167	NM_011099	ENSMUSG00000032294	Pkm	AA414905|AL024370|AL024424|Pk-2|Pk-3|Pk3|Pkm2	pyruvate kinase, muscle	protein-coding
chr13	55099769	55100567	+	0	NA	intron (NR_121592, intron 1 of 13)	CpG	132	NM_001293660	20184	Mm.259301	NM_011307	ENSMUSG00000025878	Uimc1	9430016E08Rik|D330018D10Rik|D630032M02Rik|RIP110|Rxrip110	ubiquitin interaction motif containing 1	protein-coding
chr8	70315644	70317650	+	0	NA	intron (NM_138647, intron 1 of 7)	intron (NM_138647, intron 1 of 7)	872	NM_001163282	14559	Mm.258280	NM_008107	ENSMUSG00000087408	Gdf1	AI385651|Gdf-1	growth differentiation factor 1	protein-coding
chr13	5537813	5538252	+	0	NA	Intergenic	Intergenic	320060	NR_045891	71867	Mm.179181	NR_045891	ENSMUSG00000100625	1700016G22Rik	-	RIKEN cDNA 1700016G22 gene	ncRNA
chr11	79094522	79095225	+	0	NA	intron (NM_013571, intron 1 of 17)	intron (NM_013571, intron 1 of 17)	-35037	NM_001348207	16706	Mm.4745	NM_013571	ENSMUSG00000018334	Ksr1	AW492498|B-KSR1|D11Bhm183e|D11Bhm184e|Ksr|RSU2|hb|mKSR1	kinase suppressor of ras 1	protein-coding
chrX	132453071	132453460	+	0	NA	Intergenic	Intergenic	-1234515	NR_153117	102632590	Mm.403836	NR_153117	ENSMUSG00000096978	Gm26851	-	predicted gene, 26851	ncRNA
chrX	6551741	6552167	+	0	NA	intron (NR_045426, intron 1 of 2)	L1Md_F2|LINE|L1	22709	NR_045426	71422	Mm.490927	NR_045426		5430428K19Rik	-	RIKEN cDNA 5430428K19 gene	ncRNA
chr17	94040718	94041304	+	0	NA	Intergenic	L1MC3|LINE|L1	709008	NM_001357138	76781	Mm.139146	NM_176917	ENSMUSG00000055660	Mettl4	2410198H06Rik|A730091E08Rik|AV296509|HsT661	methyltransferase like 4	protein-coding
chr11	81418973	81419510	+	0	NA	intron (NM_001034013, intron 1 of 9)	intron (NM_001034013, intron 1 of 9)	154298	NM_001033765	237880	Mm.435528	NM_001033765		1700071K01Rik	-	RIKEN cDNA 1700071K01 gene	protein-coding
chr5	13627888	13629341	+	0	NA	Intergenic	Intergenic	-163005	NM_027650	71026	Mm.158536	NM_027650	ENSMUSG00000067855	Speer3	4933405P08Rik|SPEER-3	spermatogenesis associated glutamate (E)-rich protein 3	protein-coding
chr19	7153276	7153666	+	0	NA	intron (NM_134147, intron 3 of 10)	intron (NM_134147, intron 3 of 10)	-47742	NM_201411	396184	Mm.386930	NM_201411	ENSMUSG00000047787	Flrt1	AW742165|D630040I23Rik	fibronectin leucine rich transmembrane protein 1	protein-coding
chr8	56601278	56602351	+	0	NA	Intergenic	ORR1E-int|LTR|ERVL-MaLR	50660	NM_001368348	50753	Mm.251174	NM_015791	ENSMUSG00000038206	Fbxo8	Fbx8	F-box protein 8	protein-coding
chr10	80102433	80103095	+	0	NA	promoter-TSS (NM_001359637)	promoter-TSS (NM_001359637)	-62	NM_183426	216161	Mm.262102	NM_183426	ENSMUSG00000035673	Sbno2	BC019206|F730040C21|Sno|Stno	strawberry notch 2	protein-coding
chr3	141173914	141174592	+	0	NA	Intergenic	Intergenic	38102	NM_008811	18598	Mm.4223	NM_008811	ENSMUSG00000047674	Pdha2	Pdhal	pyruvate dehydrogenase E1 alpha 2	protein-coding
chr4	130878294	130878983	+	0	NA	Intergenic	Intergenic	-34678	NM_010686	16792	Mm.271868	NM_010686	ENSMUSG00000028581	Laptm5	E3|Stra13	lysosomal-associated protein transmembrane 5	protein-coding
chr13	77816045	77816780	+	0	NA	intron (NR_028109, intron 4 of 10)	intron (NR_028109, intron 4 of 10)	107722	NR_028109	68675	Mm.343005	NM_138312	ENSMUSG00000064138	Fam172a	1110033M05Rik|2610318O14Rik|53-E6|9430037D06Rik|AF064782|pEN87	family with sequence similarity 172, member A	protein-coding
chr5	83436338	83436991	+	0	NA	Intergenic	Intergenic	-81469	NM_153801	243078	Mm.126783	NM_153801	ENSMUSG00000049537	Tecrl	D330017N19Rik|Srd5a2l2	trans-2,3-enoyl-CoA reductase-like	protein-coding
chrX	79216827	79217403	+	0	NA	Intergenic	Intergenic	300236	NM_001368718	636104	Mm.459420	NM_001099307	ENSMUSG00000073077	Cfap47	100041373|Chdc2|Gm16462|Gm3297|Gm7173|Gm8787	cilia and flagella associated protein 47	protein-coding
chr8	105892471	105892773	+	0	NA	promoter-TSS (NM_001301174)	promoter-TSS (NM_001301174)	-945	NM_175024	234700	Mm.133990	NM_175024	ENSMUSG00000044287	Nrn1l	Cpg15-2|G630049C14Rik	neuritin 1-like	protein-coding
chr9	21243914	21245187	+	0	NA	exon (NM_053190, exon 3 of 3)	exon (NM_053190, exon 3 of 3)	3893	NM_053190	94226	Mm.190619	NM_053190	ENSMUSG00000045087	S1pr5	Edg8|S1P5|lpB4	sphingosine-1-phosphate receptor 5	protein-coding
chr10	103448390	103448628	+	0	NA	Intergenic	Intergenic	80701	NM_001252330	103098	Mm.458408	NM_175328	ENSMUSG00000019894	Slc6a15	AA536730|AI326450|AI326451|v7-3	solute carrier family 6 (neurotransmitter transporter), member 15	protein-coding
chr17	24454731	24455690	+	0	NA	exon (NM_001301784, exon 1 of 14)	exon (NM_001301784, exon 1 of 14)	182	NR_125990	13560	Mm.163132	NM_007893	ENSMUSG00000024137	E4f1	p120E4F|phi-AP3	E4F transcription factor 1	protein-coding
chr19	45308859	45309206	+	0	NA	Intergenic	Intergenic	-54702	NM_001360124	12234	Mm.119717	NM_009771	ENSMUSG00000025217	Btrc	Beta-Trcp1|E3RS-IkappaB|E3RSIkappaB|FWD1|Fbw1a|HOS|SCF b-TRCP|Slimb|b-TrCP|beta-TrCP	beta-transducin repeat containing protein	protein-coding
chr4	138746887	138747260	+	0	NA	Intergenic	Intergenic	-8635	NM_001285929	212190	Mm.292226	NM_178671	ENSMUSG00000043621	Ubxn10	5730509E04Rik|A830047D02|Ubxd3	UBX domain protein 10	protein-coding
chr7	123410793	123411695	+	0	NA	intron (NM_001355050, intron 2 of 6)	intron (NM_001355050, intron 2 of 6)	3427	NM_001355050	30949	Mm.260527	NM_025304	ENSMUSG00000030763	Lcmt1	AL033290|LCMT-1|Lcmt	leucine carboxyl methyltransferase 1	protein-coding
chr2	180920560	180921440	+	0	NA	promoter-TSS (NM_173761)	promoter-TSS (NM_173761)	-64	NM_173761	228994	Mm.30205	NM_173761	ENSMUSG00000038848	Ythdf1	2210410K23Rik|8030473O16	YTH N6-methyladenosine RNA binding protein 1	protein-coding
chr6	90974055	90975108	+	0	NA	Intergenic	Intergenic	142245	NM_018815	54563	Mm.28162	NM_018815	ENSMUSG00000030091	Nup210	9830001L10|AI836801|Pom210|gp190|gp210	nucleoporin 210	protein-coding
chr17	30977308	30977812	+	0	NA	intron (NM_177465, intron 6 of 21)	intron (NM_177465, intron 6 of 21)	22877	NM_177465	52020	Mm.25923	NM_177465	ENSMUSG00000054134	Umodl1	D17Ertd488e	uromodulin-like 1	protein-coding
chr19	57138547	57139630	+	0	NA	intron (NM_001362445, intron 4 of 20)	intron (NM_001362445, intron 4 of 20)	-20064	NM_001103178	226251	Mm.217161	NM_178688	ENSMUSG00000025085	Ablim1	2210411C18Rik|2610209L21Rik|4833406P10Rik|9330196J19Rik|AV079770|AW060987|AW215784|Limab1|mKIAA0059	actin-binding LIM protein 1	protein-coding
chrX	23284647	23285767	+	0	NA	exon (NM_001290476, exon 1 of 7)	exon (NM_001290476, exon 1 of 7)	352	NM_001290476	67455	Mm.224306	NM_026167	ENSMUSG00000036782	Klhl13	1200009K10Rik|AI451128|Bklhd2|D130072F20Rik	kelch-like 13	protein-coding
chr3	94170466	94171036	+	0	NA	Intergenic	Intergenic	7442	NM_001146107	100043188	Mm.304029	NM_001146107	ENSMUSG00000074424	Gm10696	-	predicted gene 10696	protein-coding
chr3	77354625	77355287	+	0	NA	Intergenic	Intergenic	1279373	NM_001253719	213262	Mm.379337	NM_178673	ENSMUSG00000034098	Fstl5	9130207J01Rik	follistatin-like 5	protein-coding
chr6	133205992	133206478	+	0	NA	Intergenic	IAPEY4_LTR|LTR|ERVK	-85981	NM_027784	232426	Mm.158689	NM_027784	ENSMUSG00000055594	5530400C23Rik	GRP	RIKEN cDNA 5530400C23 gene	protein-coding
chr11	103311749	103312538	+	0	NA	Intergenic	CpG	32559	NM_133715	544817	Mm.259113	NM_133715	ENSMUSG00000034255	Arhgap27	2310069I04Rik|5730442P18Rik|Gm21552|Sh3d20	Rho GTPase activating protein 27	protein-coding
chr4	139352039	139353004	+	0	NA	promoter-TSS (NM_023536)	promoter-TSS (NM_023536)	55	NM_001356476	69902	Mm.27871	NM_023536	ENSMUSG00000028741	Mrto4	2610012O22Rik|Mg684|Mrt4	mRNA turnover 4, ribosome maturation factor	protein-coding
chr9	42123275	42124642	+	0	NA	exon (NM_011436, exon 1 of 48)	exon (NM_011436, exon 1 of 48)	339	NM_011436	20660	Mm.121920	NM_011436	ENSMUSG00000049313	Sorl1	2900010L19Rik|AI596264|AW261561|LR11|SorLA|gp250|mSorLA	sortilin-related receptor, LDLR class A repeats-containing	protein-coding
chr6	60793371	60794166	+	0	NA	intron (NM_009221, intron 4 of 5)	intron (NM_009221, intron 4 of 5)	35236	NM_001042451	20617	Mm.17484	NM_009221	ENSMUSG00000025889	Snca	NACP|alpha-Syn|alphaSYN	synuclein, alpha	protein-coding
chr14	89402667	89403181	+	0	NA	Intergenic	Intergenic	-493300	NR_002862	328451	Mm.320571	NR_002862		Gm5088	EG328451|Pabpc4l	poly(A)-binding protein, cytoplasmic pseudogene	pseudo
chr4	135623008	135623629	+	0	NA	Intergenic	Intergenic	-3337	NR_015613	73937	Mm.292326	NM_028688	ENSMUSG00000086788	1700029M20Rik	4930406E24Rik	RIKEN cDNA 1700029M20 gene	ncRNA
chr1	68914777	68915090	+	0	NA	intron (NM_010154, intron 1 of 26)	intron (NM_010154, intron 1 of 26)	193126	NM_010154	13869	Mm.442420	NM_010154	ENSMUSG00000062209	Erbb4	Her4|c-erbB-4	erb-b2 receptor tyrosine kinase 4	protein-coding
chr4	138461341	138461977	+	0	NA	Intergenic	MTC|LTR|ERVL-MaLR	6511	NM_025451	66259	Mm.41603	NM_025451	ENSMUSG00000046447	Camk2n1	1810006K23Rik|AI848599|AI891706	calcium/calmodulin-dependent protein kinase II inhibitor 1	protein-coding
chr7	123367353	123367664	+	0	NA	intron (NM_001122642, intron 1 of 19)	intron (NM_001122642, intron 1 of 19)	2407	NM_144529	70497	Mm.403318	NM_144529	ENSMUSG00000030766	Arhgap17	5730403H17Rik|Nadrin|Nadrin2|Rich1|Wbp15	Rho GTPase activating protein 17	protein-coding
chr4	123152869	123153554	+	0	NA	Intergenic	Intergenic	-13260	NM_019489	56031	Mm.126873	NM_019489	ENSMUSG00000028651	Ppie	2010010D16Rik|Cyp33	peptidylprolyl isomerase E (cyclophilin E)	protein-coding
chr14	43278300	43279416	+	0	NA	intron (NR_154584, intron 1 of 3)	intron (NR_154584, intron 1 of 3)	3822	NR_154584	108168154	Mm.57578	NM_028535		Gm9732	100041143|73415|Gm3161	predicted gene 9732	ncRNA
chr11	98354006	98354736	+	0	NA	intron (NR_045477, intron 2 of 2)	ID_B1|SINE|B4	3912	NR_045477	69338	Mm.398308	NR_045477	ENSMUSG00000085944	1700003D09Rik	-	RIKEN cDNA 1700003D09 gene	ncRNA
chr9	121555587	121556225	+	0	NA	Intergenic	Intergenic	-31114	NR_040740	75384	Mm.445955	NR_040740	ENSMUSG00000084995	Lyzl4os	4930589B17Rik|4930596M17Rik	lysozyme-like 4, opposite strand	ncRNA
chr1	53627625	53628351	+	0	NA	intron (NM_001252070, intron 15 of 65)	intron (NM_001252070, intron 15 of 65)	78796	NM_001252070	627872	Mm.184692	NM_001252070	ENSMUSG00000096141	Dnah7a	Dnahc7|Dnahc7a|Gm992	dynein, axonemal, heavy chain 7A	protein-coding
chr4	133756655	133757737	+	0	NA	promoter-TSS (NM_001363070)	promoter-TSS (NM_001363070)	-427	NM_001363070	93760	Mm.22478	NM_001080819	ENSMUSG00000007880	Arid1a	1110030E03Rik|BAF250a|Osa1|Smarcf1	AT rich interactive domain 1A (SWI-like)	protein-coding
chr4	133240824	133241907	+	0	NA	exon (NM_016693, exon 1 of 29)	exon (NM_016693, exon 1 of 29)	547	NM_016693	53608	Mm.36640	NM_016693	ENSMUSG00000028862	Map3k6	Ask2|MAPKKK6|MEKK6	mitogen-activated protein kinase kinase kinase 6	protein-coding
chr11	26161613	26161902	+	0	NA	intron (NR_027973, intron 1 of 5)	intron (NR_027973, intron 1 of 5)	-40483	NR_105791	102466154		NR_105791	ENSMUSG00000099015	Mir6372	Gm27358|mmu-mir-6372	microRNA 6372	ncRNA
chr2	30619008	30619434	+	0	NA	Intergenic	Intergenic	24177	NM_030137	78617	Mm.40413	NM_030137	ENSMUSG00000047363	Cstad	9530039B02Rik	CSA-conditional, T cell activation-dependent protein	protein-coding
chr11	116412365	116413693	+	0	NA	promoter-TSS (NM_027258)	promoter-TSS (NM_027258)	3	NM_027258	217340	Mm.426344	NM_027258	ENSMUSG00000052949	Rnf157	2610036E23Rik|A130073L17Rik|mKIAA1917	ring finger protein 157	protein-coding
chr18	35840165	35841018	+	0	NA	intron (NM_001357458, intron 1 of 2)	intron (NM_001357458, intron 1 of 2)	10277	NM_001357458	67393	Mm.94560	NM_133687	ENSMUSG00000046668	Cxxc5	4930415K17Rik	CXXC finger 5	protein-coding
chr15	98792524	98793019	+	0	NA	exon (NM_021279, exon 4 of 4)	exon (NM_021279, exon 4 of 4)	2914	NM_021279	22408	Mm.1123	NM_021279	ENSMUSG00000022997	Wnt1	Int-1|Wnt-1|sw|swaying	wingless-type MMTV integration site family, member 1	protein-coding
[truncated: 22,496 more rows]

## Sheet: DAR_Promoter-TSS
Chr	Start	End	Strand	Peak Score	Focus Ratio/Region Size	Annotation	Detailed Annotation	Distance to TSS	Nearest PromoterID	Entrez ID	Nearest Unigene	Nearest Refseq	Nearest Ensembl	Gene Name	Gene Alias	Gene Description	Gene Type
[truncated: 2,578 more rows]
