# Supplementary material for: INTACT vs. FANS for Cell-Type-Specific Nuclei Sorting: A Comprehensive Qualitative and Quantitative Comparison
Source: Int J Mol Sci. 2021 May 19;22(10):5335. doi: 10.3390/ijms22105335 (PMC8159132; doi:10.3390/ijms22105335)
Supplement: Supplementary file 1 [file ijms-22-05335-s001.zip › Supplementary Table S4 Motifs.xlsx]

## Sheet: Gained_accessibility_peak_motif
Motif Name	Consensus	P-value	Log P-value	q-value (Benjamini)	# of Target Sequences with Motif(of 180)	% of Target Sequences with Motif	# of Background Sequences with Motif(of 29720)	% of Background Sequences with Motif
Pbx3(Homeobox)/GM12878-PBX3-ChIP-Seq(GSE32465)/Homer	SCTGTCAMTCAN	1e-06	-14.83	0.0002	26	0.1444	1379	0.0464
Pknox1(Homeobox)/ES-Prep1-ChIP-Seq(GSE63282)/Homer	SCTGTCAVTCAV	1e-05	-13.59	0.0003	25	0.1389	1379.6	0.0465
Six2(Homeobox)/NephronProgenitor-Six2-ChIP-Seq(GSE39837)/Homer	GWAAYHTGAKMC	0.01	-6.381	0.2483	40	0.2222	4127.5	0.139
NFkB-p65-Rel(RHD)/ThioMac-LPS-Expression(GSE23622)/Homer	GGAAATTCCC	0.01	-5.899	0.3016	7	0.0389	301.5	0.0102
TATA-Box(TBP)/Promoter/Homer	CCTTTTAWAGSC	0.01	-5.702	0.3016	54	0.3	6275.8	0.2113
PAX5(Paired,Homeobox),condensed/GM12878-PAX5-ChIP-Seq(GSE32465)/Homer	GTCACGCTCSCTGM	0.01	-5.63	0.3016	9	0.05	494.8	0.0167
PBX2(Homeobox)/K562-PBX2-ChIP-Seq(Encode)/Homer	RTGATTKATRGN	0.01	-5.103	0.3819	28	0.1556	2800.7	0.0943
bZIP:IRF(bZIP,IRF)/Th17-BatF-ChIP-Seq(GSE39756)/Homer	NAGTTTCABTHTGACTNW	0.01	-4.949	0.3898	18	0.1	1559.2	0.0525
IRF2(IRF)/Erythroblas-IRF2-ChIP-Seq(GSE36985)/Homer	GAAASYGAAASY	0.01	-4.784	0.4089	11	0.0611	775.1	0.0261
GATA:SCL(Zf,bHLH)/Ter119-SCL-ChIP-Seq(GSE18720)/Homer	CRGCTGBNGNSNNSAGATAA	0.01	-4.721	0.4089	8	0.0444	472.3	0.0159

## Sheet: Reducedaccessibility_peak_motif
Motif Name	Consensus	P-value	Log P-value	q-value (Benjamini)	# of Target Sequences with Motif(of 2199)	% of Target Sequences with Motif	# of Background Sequences with Motif(of 25694)	% of Background Sequences with Motif
Elk4(ETS)/Hela-Elk4-ChIP-Seq(GSE31477)/Homer	NRYTTCCGGY	1e-12	-29.63	0	794	0.3611	7340.9	0.2857
NRF1(NRF)/MCF7-NRF1-ChIP-Seq(Unpublished)/Homer	CTGCGCATGCGC	1e-12	-29.22	0	474	0.2156	3960.4	0.1541
NRF(NRF)/Promoter/Homer	STGCGCATGCGC	1e-10	-23.65	0	464	0.211	4016.4	0.1563
ETS(ETS)/Promoter/Homer	AACCGGAAGT	1e-09	-22.37	0	533	0.2424	4779.1	0.186
Elk1(ETS)/Hela-Elk1-ChIP-Seq(GSE31477)/Homer	HACTTCCGGY	1e-08	-20.65	0	760	0.3456	7301.2	0.2841
YY1(Zf)/Promoter/Homer	CAAGATGGCGGC	1e-08	-18.55	0	159	0.0723	1130.9	0.044
ELF1(ETS)/Jurkat-ELF1-ChIP-Seq(SRA014231)/Homer	AVCCGGAAGT	1e-08	-18.49	0	699	0.3179	6719.9	0.2615
Sp1(Zf)/Promoter/Homer	GGCCCCGCCCCC	1e-07	-17.07	0	911	0.4143	9153	0.3562
KLF1(Zf)/HUDEP2-KLF1-CutnRun(GSE136251)/Homer	VDGGGYGGGGCY	1e-06	-16.01	0	1277	0.5807	13443.9	0.5232
NFY(CCAAT)/Promoter/Homer	RGCCAATSRG	1e-05	-12.88	0.0001	650	0.2956	6439.3	0.2506
Rfx2(HTH)/LoVo-RFX2-ChIP-Seq(GSE49402)/Homer	GTTGCCATGGCAACM	1e-05	-12.85	0.0001	127	0.0578	947.2	0.0369
ETV1(ETS)/GIST48-ETV1-ChIP-Seq(GSE22441)/Homer	AACCGGAAGT	1e-05	-12.26	0.0002	872	0.3965	8966.2	0.3489
RFX(HTH)/K562-RFX3-ChIP-Seq(SRA012198)/Homer	CGGTTGCCATGGCAAC	1e-05	-12.23	0.0002	124	0.0564	932.7	0.0363
EWS:FLI1-fusion(ETS)/SK_N_MC-EWS:FLI1-ChIP-Seq(SRA014231)/Homer	VACAGGAAAT	0.0001	-11.13	0.0005	430	0.1955	4118.3	0.1603
GABPA(ETS)/Jurkat-GABPa-ChIP-Seq(GSE17954)/Homer	RACCGGAAGT	0.0001	-10.81	0.0006	714	0.3247	7266.3	0.2828
ETV4(ETS)/HepG2-ETV4-ChIP-Seq(ENCODE)/Homer	ACCGGAAGTG	0.0001	-10.43	0.0008	886	0.4029	9237.4	0.3595
Sp2(Zf)/HEK293-Sp2.eGFP-ChIP-Seq(Encode)/Homer	YGGCCCCGCCCC	0.0001	-10.38	0.0008	1553	0.7062	17073.1	0.6645
KLF5(Zf)/LoVo-KLF5-ChIP-Seq(GSE49402)/Homer	DGGGYGKGGC	0.0001	-10.33	0.0008	1377	0.6262	14966.5	0.5825
Rfx1(HTH)/NPC-H3K4me1-ChIP-Seq(GSE16256)/Homer	KGTTGCCATGGCAA	0.0001	-10.15	0.0009	155	0.0705	1284.9	0.05
KLF3(Zf)/MEF-Klf3-ChIP-Seq(GSE44748)/Homer	NRGCCCCRCCCHBNN	0.0001	-9.982	0.001	888	0.4038	9289.5	0.3615
ETS1(ETS)/Jurkat-ETS1-ChIP-Seq(GSE17954)/Homer	ACAGGAAGTG	0.001	-9.125	0.0023	687	0.3124	7066.1	0.275
Fli1(ETS)/CD8-FLI-ChIP-Seq(GSE20898)/Homer	NRYTTCCGGH	0.001	-8.875	0.0028	855	0.3888	8987.2	0.3498
X-box(HTH)/NPC-H3K4me1-ChIP-Seq(GSE16256)/Homer	GGTTGCCATGGCAA	0.001	-8.746	0.003	94	0.0427	726.1	0.0283
KLF6(Zf)/PDAC-KLF6-ChIP-Seq(GSE64557)/Homer	MKGGGYGTGGCC	0.001	-8.292	0.0046	1169	0.5316	12660.6	0.4927
Klf4(Zf)/mES-Klf4-ChIP-Seq(GSE11431)/Homer	GCCACACCCA	0.001	-8.032	0.0057	513	0.2333	5192.4	0.2021
Foxh1(Forkhead)/hESC-FOXH1-ChIP-Seq(GSE29422)/Homer	NNTGTGGATTSS	0.001	-7.872	0.0064	134	0.0609	1142.8	0.0445
Elf4(ETS)/BMDM-Elf4-ChIP-Seq(GSE88699)/Homer	ACTTCCKGKT	0.001	-7.202	0.0121	668	0.3038	6983.9	0.2718
KLF14(Zf)/HEK293-KLF14.GFP-ChIP-Seq(GSE58341)/Homer	RGKGGGCGKGGC	0.001	-7.144	0.0124	1586	0.7212	17699.9	0.6888
Etv2(ETS)/ES-ER71-ChIP-Seq(GSE59402)/Homer	NNAYTTCCTGHN	0.001	-6.915	0.0151	550	0.2501	5677.4	0.221
GFY-Staf(?,Zf)/Promoter/Homer	RACTACAATTCCCAGAAKGC	0.01	-6.285	0.0273	140	0.0637	1257.7	0.0489
ZNF692(Zf)/HEK293-ZNF692.GFP-ChIP-Seq(GSE58341)/Homer	GTGGGCCCCA	0.01	-6.255	0.0273	97	0.0441	821.8	0.032
LHX9(Homeobox)/Hct116-LHX9.V5-ChIP-Seq(GSE116822)/Homer	NGCTAATTAG	0.01	-5.823	0.0407	300	0.1364	2984.6	0.1162
Brn2(POU,Homeobox)/NPC-Brn2-ChIP-Seq(GSE35496)/Homer	ATGAATATTC	0.01	-5.282	0.0677	17	0.0077	92.5	0.0036
ZNF143|STAF(Zf)/CUTLL-ZNF143-ChIP-Seq(GSE29600)/Homer	ATTTCCCAGVAKSCY	0.01	-5.258	0.0677	223	0.1014	2181.5	0.0849
SPDEF(ETS)/VCaP-SPDEF-ChIP-Seq(SRA014231)/Homer	ASWTCCTGBT	0.01	-5.186	0.0704	496	0.2256	5200.3	0.2024
Ronin(THAP)/ES-Thap11-ChIP-Seq(GSE51522)/Homer	RACTACAACTCCCAGVAKGC	0.01	-5.108	0.0739	127	0.0578	1168.8	0.0455
c-Myc(bHLH)/LNCAP-cMyc-ChIP-Seq(Unpublished)/Homer	VCCACGTG	0.01	-4.91	0.0876	380	0.1728	3925.7	0.1528
